# Supplementary material for: Synthesis of aminoalcohols from substituted alkenes via tungstenooxaziridine catalysis
Source: Royal Society of Chemistry journal article supplement (doi:10.1039/d4ob00022f), 2024-01-01

## Synthesis of Aminoalcohols from Substituted Alkenes via Tungstenoxaziridine Catalysis

Rufai Madiu, Brandon Dellosso, Erin L. Doran, Jenna M. Doran, Ali A. Pinarci, Tyler M. TenHoeve, Amari M. Howard, James L. Stroud, Dominic A. Rivera, Dylan A. Moskovitz, Steven J. Finneran, Alyssa N. Singer, Morgan E. Rossi and Gustavo Moura-Letts\*

*moura-letts@rowan.edu*

*Department of Chemistry and Biochemistry, College of Science and Mathematics  
Rowan University  
201 Mullica Hill Rd, Glassboro, NJ, 08028*

### Supporting Information

|                                                      |     |
|------------------------------------------------------|-----|
| A. Materials and Methods                             | S1  |
| B. Synthesis of Tungstenoxaziridine <b>1</b>         | S11 |
| C. Synthesis of aminoalcohols from <b>Table 2-4</b>  | S12 |
| D. <sup>1</sup> H-NMR and <sup>13</sup> C-MR spectra | S28 |

## **A. MATERIALS AND METHODS**

Reagents were obtained from Aldrich Chemical ([www.sigma-aldrich.com](http://www.sigma-aldrich.com)), Acros Organics ([www.us.vwr.com](http://www.us.vwr.com)) or Alfa Aesar ([www.us.vwr.com](http://www.us.vwr.com)) and used without further purification. Solvents were obtained from EMD Miliphore DrySol ([www.us.vwr.com](http://www.us.vwr.com)) and degassed with N<sub>2</sub>. Solution phase reactions were performed in glass vials or round bottom flasks with inert atmosphere and magnetic stirring. Cold baths were generated as follows: 0 °C, wet ice/water; –10 °C, ice/acetone; –20 °C, dry ice/isopropanol monitored with a thermometer; –44 °C, dry ice/CH<sub>3</sub>CN; –63 °C, dry ice/chloroform; –78 °C, dry ice/acetone; –100 °C, liquid nitrogen in hexanes/Et<sub>2</sub>O. Heated reactions were performed using IKA heating blocks. TLC was performed on 0.25 mm E. Merck silica gel 60 F254 plates and visualized under UV light and/or the following stain solutions: cerium ammonium molybdate (CAM), phosphomolybdic acid (PMA), iodine (I<sub>2</sub>), or *p*-anisaldehyde. Silica flash chromatography was performed on E. Merck 230–400 mesh silica gel 60. Automated chromatography was performed on a ISOLERA Prime instrument with 10 g. SNAP silica gel normal phase cartridges using a flow rate of 12.0 mL/min and a gradient of 0–100% EtOAc in heptanes over 20 min with UV detection at 254 nm. NMR spectra were recorded on a Bruker Avance Neo 400 MHz Spectrometer at 24 °C in CDCl<sub>3</sub> unless otherwise indicated. Chemical shifts are expressed in ppm relative to TMS (<sup>1</sup>H, 0 ppm) or solvent signals: CDCl<sub>3</sub> (<sup>1</sup>H, 7.23 ppm; <sup>13</sup>C, 77.0 ppm); coupling constants are expressed in Hz. Low and high resolution mass spectroscopy was performed on a Agilent 6230 Accurate-Mass Time-of-Flight 1290 Infinity UHPLC/MS. Elemental analysis was performed on a Perkin Elmer CHN 2400 analyzer.

### **General method for the synthesis of aminoalcohol 3:**

In a 16 mL vial packed with a magnetic stirrer, sulfonamide (0.75 mmol, 1.5 equiv.) and TCCA (0.25 mmol, 0.5 equiv.) were mixed in CH<sub>2</sub>Cl<sub>2</sub> (4 mL) at 0 °C for 30 min. The solvent was then removed under vacuum and the residue was reconstituted with CH<sub>3</sub>CN/H<sub>2</sub>O (4 mL, 10:1) and then WO<sub>2</sub>Dipic(H<sub>2</sub>O) (0.005 mmol, 1 mol%), TBAI (0.0375 mmol, 7.5 mol%) and alkene **2** (0.5 mmol, 1 equiv.) were added and the resulting mixture was allowed to stir for 16h or until disappearance of alkene by TLC. The crude was then filtered by a 1:1 silica gel/celite pad and the resulting crude was then purified by silica gel chromatography to provide the corresponding aminoalcohol **3**.

### **Mechanism and kinetic experiments:**

Based on our previous efforts on studying the kinetics of metalloxaziridine catalysis. We anticipate [Ts-chloramine] having saturation kinetics, thus WO<sub>2</sub>Dipic(H<sub>2</sub>O) would undergo fast reaction with Ts-chloramine to form complex **1** prior to alkene coordination. Moreover, if the hydrolytic step is the rate-determining-step, the rate constant for tungstenooxaziridine addition to form intermediate **A** must be much larger than the rate constant for the hydrolytic step. Given the fact that H<sub>2</sub>O is in high excess relative to the substrate, we anticipate pseudo-first-order kinetics for this reaction. We tested pseudo-first order kinetics for styrene and four other para-substituted styrenes (Figure S1).

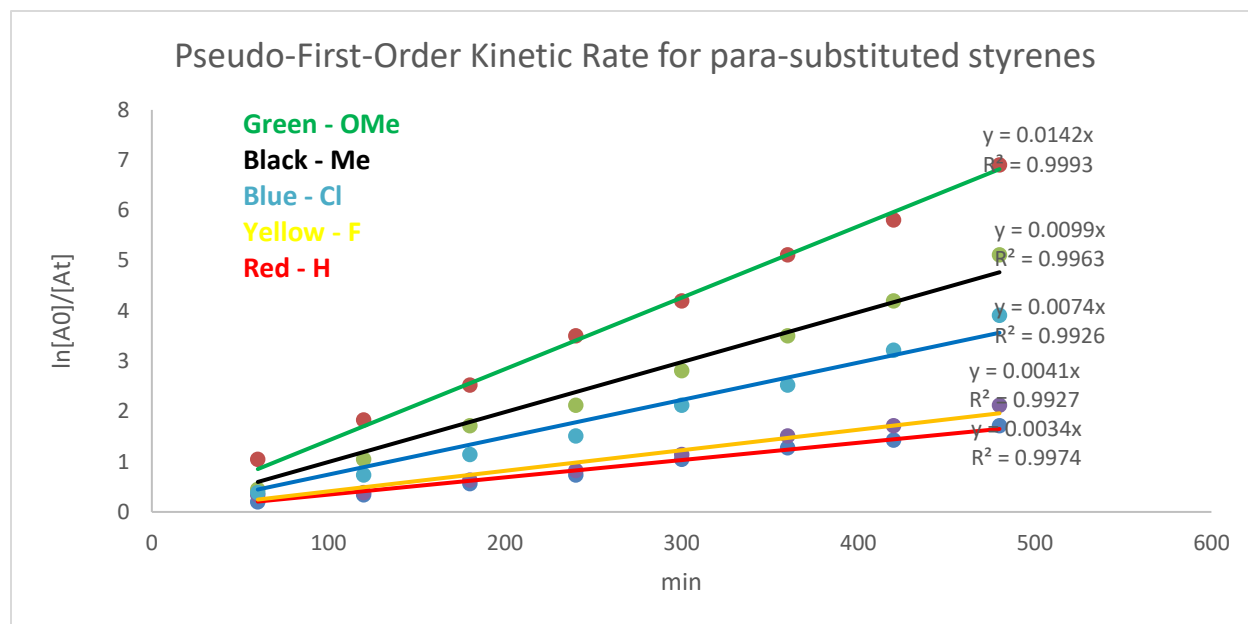

**Figure S1.** Pseudo-first order kinetic rate plots for different para-substituted styrenes.

Reaction rates in kinetic experiments were monitored every hour up to full conversion to aminoalcohol **3j**, **3k**, **3p**, **3s**, and **3t**. The observed pseudo-first order kinetic plots for para-substituted styrenes are in agreement with fast addition of tungstenooxaziridine across alkene and slow, rate-determining-step, hydrolytic step.

**General procedure for pseudo-first-order kinetic plots:** In a 16 mL vial packed with a magnetic stirrer, toluenesulfonamide (1.5 mmol, 3 equiv.) and TCCA (0.5 mmol, 1 equiv.) were mixed in  $\text{CH}_2\text{Cl}_2$  (12 mL) at 0 °C for 30 min. The solvent was then removed under vacuum and the residue was reconstituted with  $\text{CH}_3\text{CN}/\text{H}_2\text{O}$  (12 mL, 10:1) and then  $\text{WO}_2\text{Dipic}(\text{H}_2\text{O})$  (0.005 mmol, 1 mol%), TBAI (0.0375 mmol, 7.5 mol%) and alkene **2j** (1.5 mmol, 3 equiv.) were added. Aliquots (200  $\mu\text{L}$ ) were removed periodically over a period of 12 hours, filtered by a 1:1 silica gel/celite pad, washed with EtOAc and the resulting mixture was then analyzed by  $^1\text{H-NMR}$  to quantify the formation of aminoalcohol **3j**.

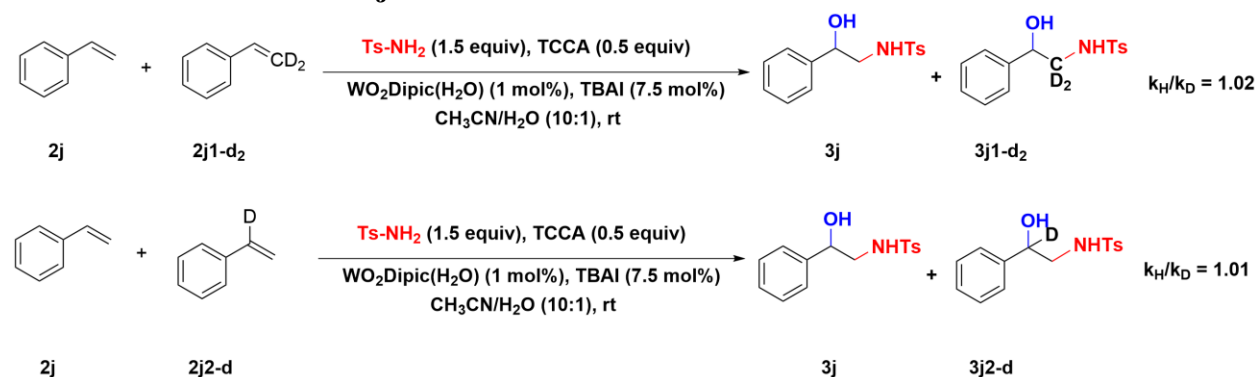

**Scheme S1.** Deuterium-labeling competition experiments.

**Competition experiments:** These experiments were designed using deuterated  $\alpha$ -*d* styrene **2j2-d** and  $\beta$ -*d* styrene **2j1-d<sub>2</sub>** were designed to address the nature of the proposed catalytic cycle (Scheme S1). A competition experiment between **2j** versus **2j1-d<sub>2</sub>** and **2j** versus **2j2-d** would provide secondary kinetic isotope effect data. Thus, both mixtures (1:1, 4 equiv. each) of **2j/2j1-d<sub>2</sub>** and **2j/2j2-d** were reacted under general method to provide the respective aminoalcohols **3j**, **3j1-d<sub>2</sub>**, and **3j2-d**. After correcting for **2j1-d<sub>2</sub>** deuterium purity (96%-*d*) and

2j2-*d* deuterium purity (95%-*d*), we obtained  $k_H/k_D$  of 1.02 and 1.01 respectively. The lack of secondary kinetic isotope effect confirms that tungstenoxaziridine addition across the alkene is rather fast. This is also in agreement with a highly concerted tungstenoxazolidine (intermediate **A**) formation step, thus supporting the formation of a biradical species in the transition state.

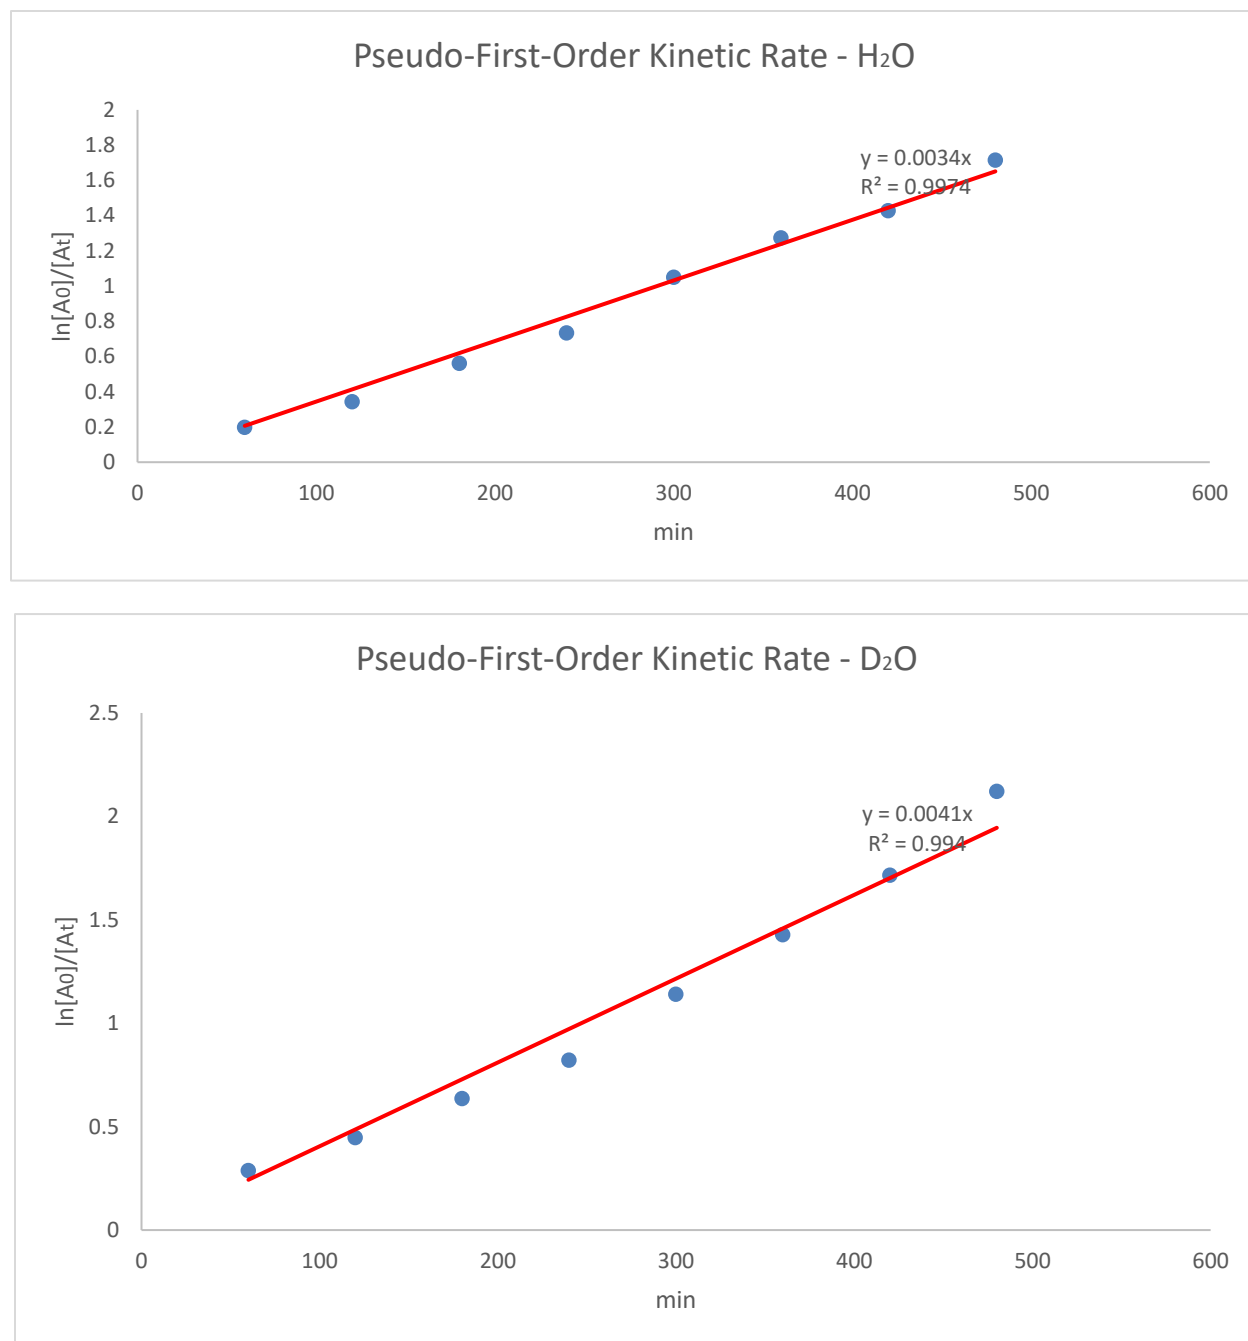

**Figure S2.** Pseudo-first-order kinetic plots for KSIE.

Kinetic solvent isotope effect (KSIE) studies were also performed using **2j** in CH<sub>3</sub>CN/H<sub>2</sub>O and CH<sub>3</sub>CN/D<sub>2</sub>O. Pseudo-first order kinetic plots were determined for both conditions and the rate constants determined (Figure S2). The results indicate a clear rate acceleration from CH<sub>3</sub>CN/H<sub>2</sub>O

to CH<sub>3</sub>CN/D<sub>2</sub>O, with a  $K_{H_2O}/K_{D_2O} = 0.83$ . The inverse KSIE corroborates that hydrolysis is the rate-determining-step and that a second molecule of H<sub>2</sub>O participates during the hydrolytic rate-determining-step.

**General Procedure for competition experiments with deuterated-alkenes:** In a 16 mL vial packed with a magnetic stirrer, toluenesulfonamide (0.75 mmol, 1.5 equiv.) and TCCA (0.25 mmol, 0.5 equiv.) were mixed in CH<sub>2</sub>Cl<sub>2</sub> (4 mL) at 0 °C for 30 min. The solvent was then removed under vacuum and the residue was reconstituted with CH<sub>3</sub>CN/H<sub>2</sub>O (4 mL, 10:1) and then WO<sub>2</sub>Dipic(H<sub>2</sub>O) (0.005 mmol, 1 mol%), TBAI (0.0375 mmol, 7.5 mol%) and alkene **2j** (0.25 mmol, 0.5 equiv.), and alkene **2j1-d<sub>2</sub>** (0.25 mmol, 0.5 equiv.) were added. The reaction was then quickly flashed with nitrogen and allowed to stir at rt for 8 hours. The crude was then filtered by a 1:1 silica gel/celite pad and the resulting mixture was then purified by silica gel chromatography and the ratio of aminoalcohols **3j** and **3j1-d<sub>2</sub>** was calculated from the resulting <sup>1</sup>H-NMR spectra.

**General procedure for KSIE under pseudo-first-order rate constants:** In a 16 mL vial packed with a magnetic stirrer, toluenesulfonamide (1.5 mmol, 3 equiv.) and TCCA (0.5 mmol, 1 equiv.) were mixed in CH<sub>2</sub>Cl<sub>2</sub> (12 mL) at 0 °C for 30 min. The solvent was then removed under vacuum and the residue was reconstituted with CH<sub>3</sub>CN/D<sub>2</sub>O (12 mL, 10:1) and then WO<sub>2</sub>Dipic(H<sub>2</sub>O) (0.005 mmol, 1 mol%), TBAI (0.0375 mmol, 7.5 mol%) and alkene **2j** (1.5 mmol, 3 equiv.) were added. Aliquots (200 μL) were removed periodically over a period of 12 hours, filtered by a 1:1 silica gel/celite pad, washed with EtOAc and the resulting mixture was then analyzed by <sup>1</sup>H-NMR to quantify the formation of aminoalcohol **3j**.

### Hammett experiments:

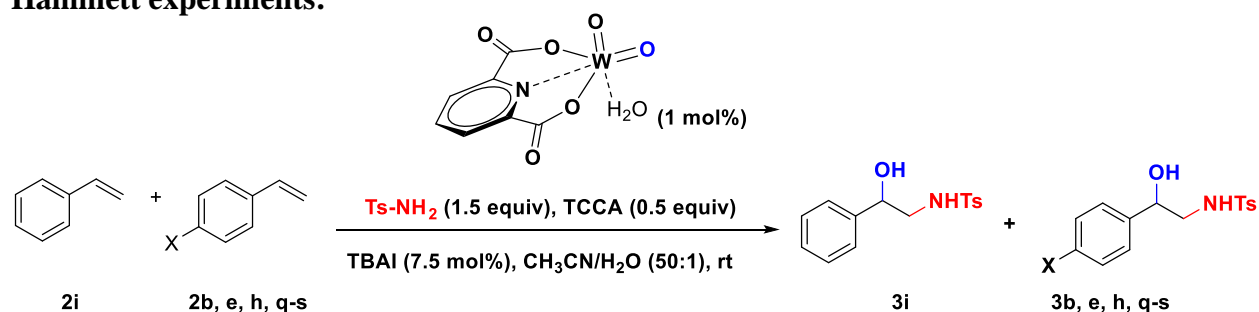

**General Procedure for competition experiments for Hammett plot:** In a 16 mL vial packed with a magnetic stirrer, toluenesulfonamide (0.75 mmol, 1.5 equiv.) and TCCA (0.25 mmol, 0.5 equiv.) were mixed in CH<sub>2</sub>Cl<sub>2</sub> (8 mL) at 0 °C for 30 min. The solvent was then removed under vacuum and the residue was reconstituted with CH<sub>3</sub>CN/H<sub>2</sub>O (8 mL, 10:1) and then WO<sub>2</sub>Dipic(H<sub>2</sub>O) (0.005 mmol, 1 mol%), TBAI (0.0375 mmol, 7.5 mol%) and alkene **2j** (1 mmol, 2 equiv.), and alkene **2k** (1 mmol, 2 equiv.) were added. The reaction was then quickly flashed with nitrogen and allowed to stir at rt for 12 hours. The crude was then filtered by a 1:1 silica gel/celite pad and the resulting mixture was then purified by silica gel chromatography and the ratio of aminoalcohols **3j** and **3k** was calculated from the resulting <sup>1</sup>H-NMR spectra. The same procedure was performed separately for alkenes **2n**, **2p**, **2s-u**.

| Entry | X    | $K_X/K_H$ | $\text{Log}(K_X/K_H)$ | constant |
|-------|------|-----------|-----------------------|----------|
| 1     | H    | 1         | 0                     | 0        |
| 2     | Me   | 1.93      | 0.2855                | -0.17    |
| 3     | t-Bu | 2.48      | 0.3944                | -0.20    |
| 4     | MeO  | 3.18      | 0.5024                | -0.27    |
| 5     | Cl   | 1.52      | 0.1818                | 0.23     |

|   |   |      |        |      |
|---|---|------|--------|------|
| 6 | I | 1.34 | 0.1271 | 0.18 |
| 7 | F | 1.12 | 0.0492 | 0.06 |
|   |   |      |        |      |

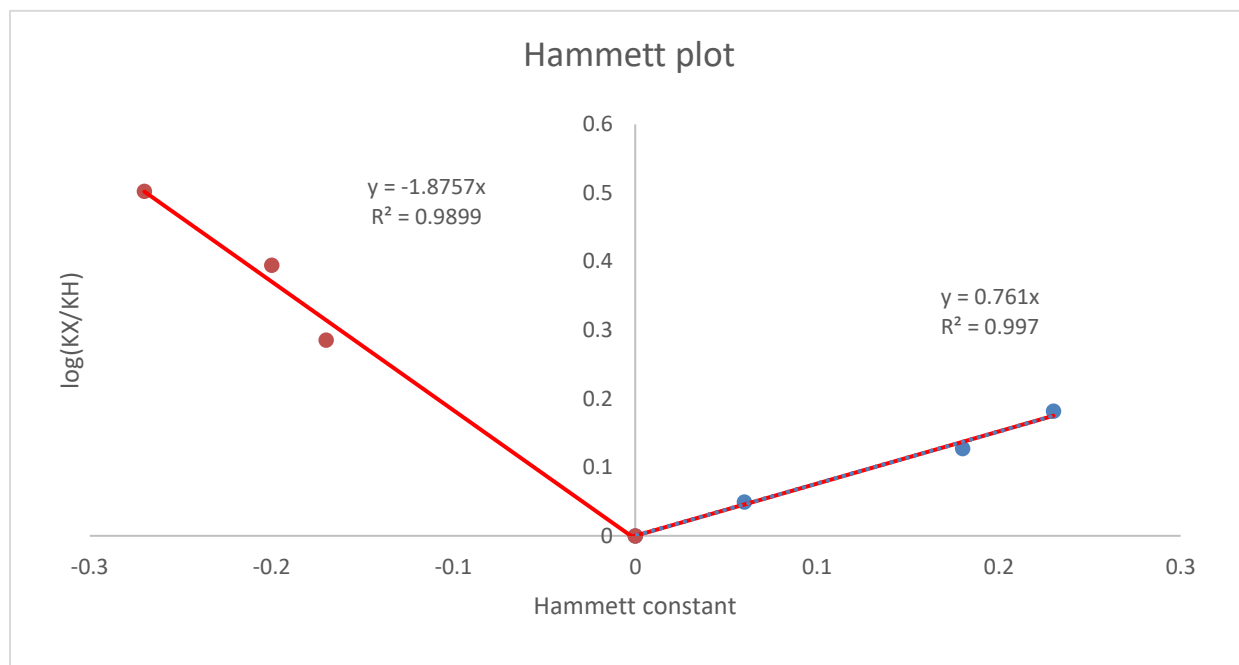

Figure S3. Hammett plot.

The Hammett experiments provided a  $\rho = -1.87$  for EDGs and  $0.75$  for EWGs, indicating that both groups lead to increase rates of oxyamination. This result is in agreement with a fast and highly concerted *syn*-addition of tungstenoxaziridine **1** across **2**. This is also in agreement with the development of a biradical character through *N-O* bond homolytic cleavage in the transition state. The observed acceleration in the hydrolytic rate-determining-step can be rationalized for EDG as a positive charge develops on the tungstenoxazolidine *O* in **TS-A**. On the other hand, the observed small acceleration in the hydrolytic step for EWG is rationalized as a small negative charge develops in the tungstenoxazolidine *N* in **TS-B**. In **TS-A** the  $\text{H}_2\text{O}$  low-field ligand does not engage in proton transfer, thus allowing for the *O* to develop a strong positive charge. While, in **TS-B** the  $\text{H}_2\text{O}$  low-field ligand participates in intramolecular proton transfer to accelerate the hydrolysis as the weakly negative charges develop on *N* (Figure S4).

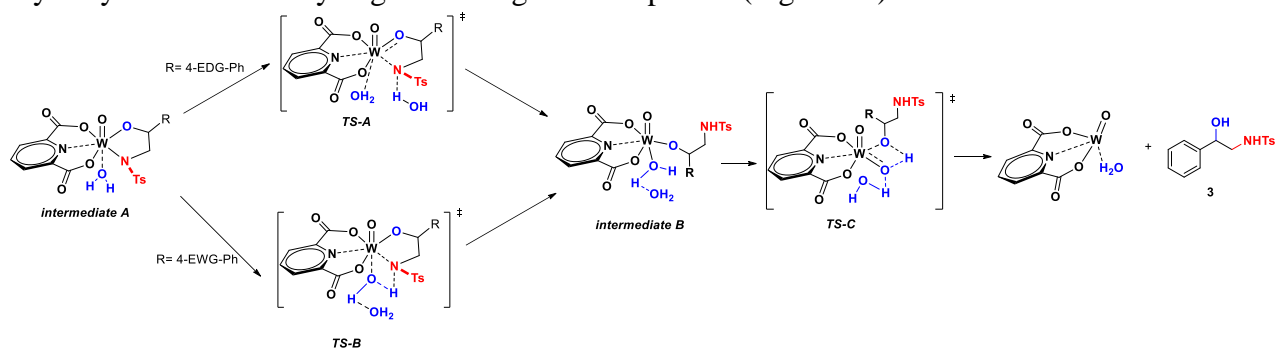

Figure S4. Proposed mechanistic rationales for oxyamination catalytic cycle.

**Intermediate A characterization:**

We prepared a stoichiometric reaction (1 equiv. of **1** + 1 equiv. 4-methoxystyrene) in  $\text{CH}_3\text{CN}$  under anhydrous conditions, and we were able to observe intermediate **A** by mass spectrometry (ESI  $m/z$ :  $\text{M}+\text{H} = 703.3$ , characteristic isotopic pattern for **W** was observed) and by  $^1\text{H-NMR}$ . It is clear by this experiment that in complete absence of exogenous water, intermediate **A** does not undergo hydrolysis to eventually form the aminohydroxylation product. This mixture was then reacted with 20 equiv. of  $\text{H}_2\text{O}$  and the expected aminohydroxylation **3p** was then observed. These results prove the formation of intermediate **A**, but also demonstrate that a second molecule of water is needed to trigger the hydrolysis step and thus be included in the mechanism.

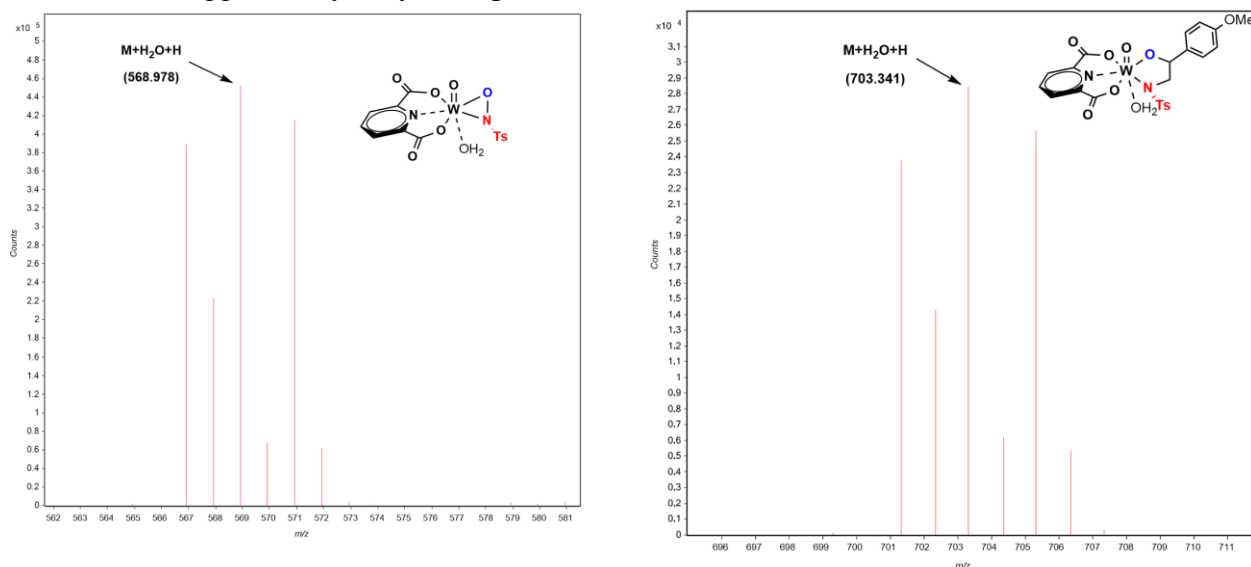

Figure S6. MS for tungstenoxaziridine **1** and intermediate **A**.

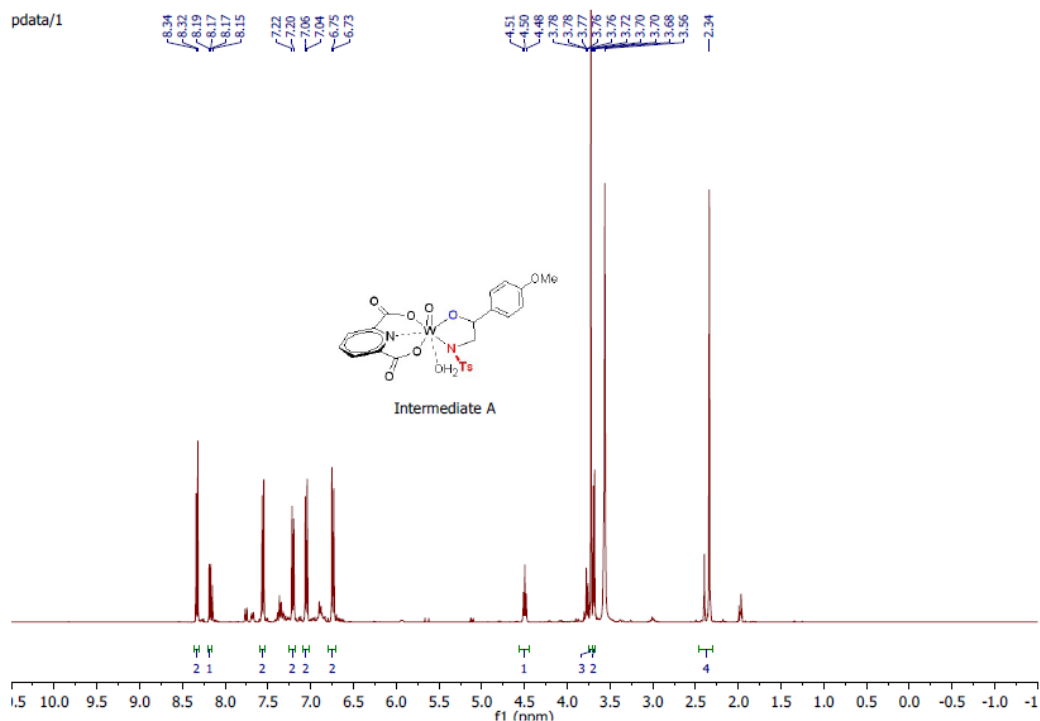

Figure S7.  $^1\text{H-NMR}$  for intermediate **A** in  $\text{CD}_3\text{CN}$ .

**Control experiments:** Experiments in the absence of  $\text{WO}_2\text{Dipic}(\text{H}_2\text{O})$  did not provide any product **3j**. Moreover, no combination of sulfonamide/TCAA and PTC were able to produce aminoalcohol **3j**. The reaction under catalytic conditions in the absence of PTC achieves moderate conversion for **3j** (35%) after 96h.

Below there is a list of some other control experiments that further validate the proposed mechanism:

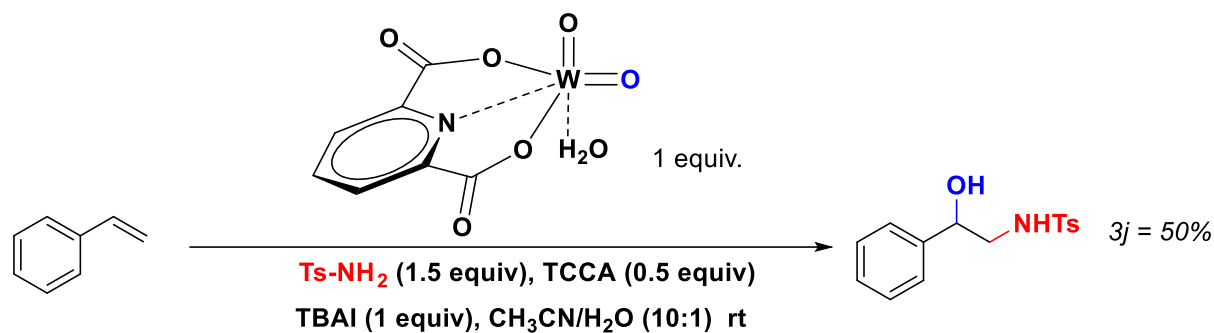

The reaction with stoichiometric amounts of  $\text{WO}_2\text{Dipic}(\text{H}_2\text{O})$  proved to work in moderate yield.  $\text{WO}_2\text{Dipic}(\text{H}_2\text{O})$  is a light green solid and tungstenoxaziridine **1** (active catalyst) is a slightly darker green solid, thus upon mixing  $\text{WO}_2\text{Dipic}(\text{H}_2\text{O})$  with sulfonamide/TCCA we did observe a subtle change in color. However, the liquid/solid interface was greatly disturbed, and the increased heterogeneity hurt the reaction conversion. The conversion to **3j** validates the required formation of active catalyst **1** to promote the observed reaction. Moreover, MS proves the formation of **1** and that it can be measured spectroscopically.

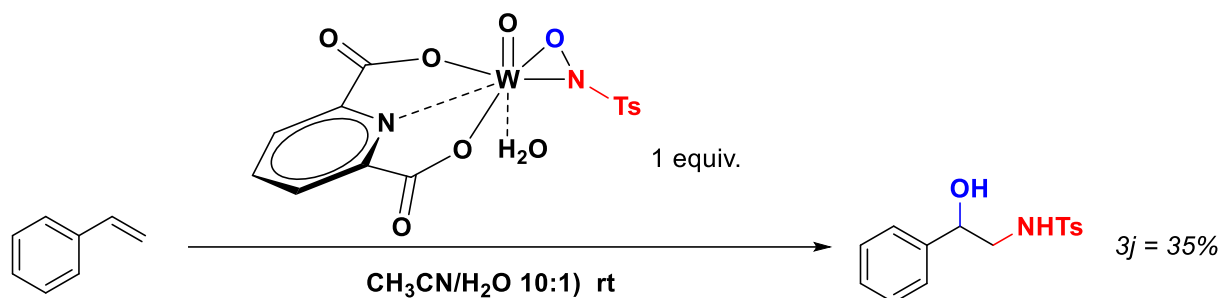

The reaction with stoichiometric amounts of **1** provided the expected product in low yield. Despite the increased solubility of **1**, the reaction was cloudy and after 3 h the reaction was completely heterogeneous. Despite the low conversion due to decomposition pathways, this experiment further proves that the reaction does not go through a LA-activated pathway neither PTC plays a role in the actual transformation. Thus, providing further evidence for the proposed pathway and the first report of a metalloxaziridine-mediated oxyamination reaction.

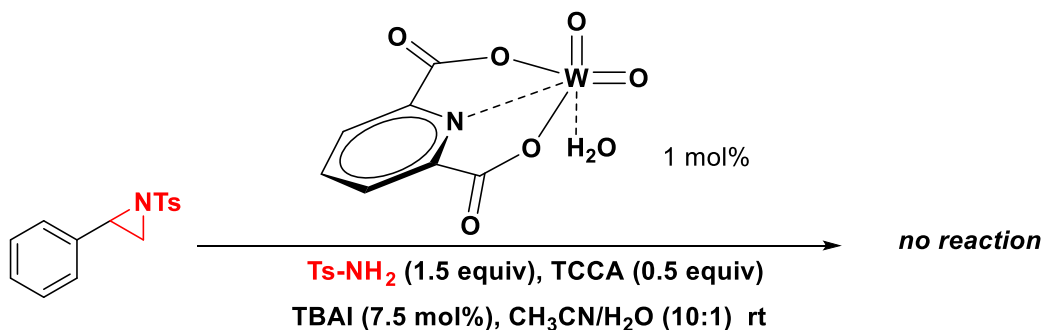



Under the reaction conditions, 2-phenyl-1-tosylaziridine does not react and no traces of the respective aminoalcohol are observed in the crude reaction mixture. This clearly indicated that aziridine is not an intermediate for this oxyamination reaction.

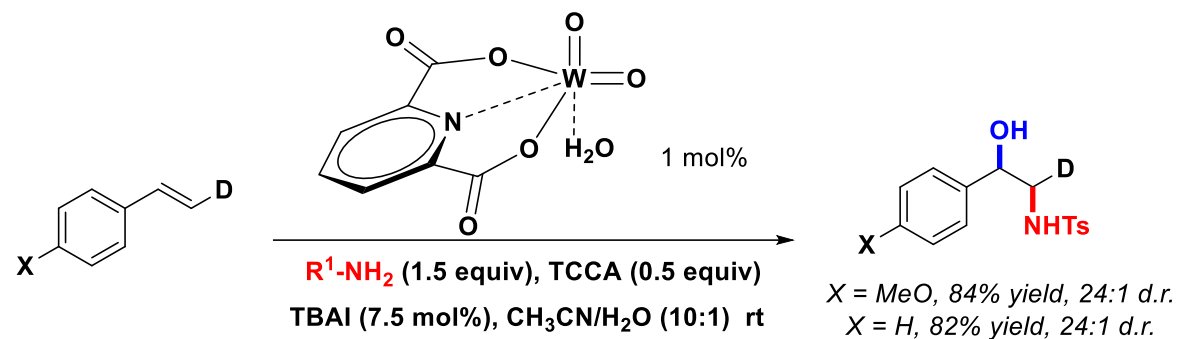

The reaction with  $\beta$ -D styrenes provided further evidence that the reaction is highly stereospecific and that a highly concerted pathway is likely due to the lack of observable 1,2-H/D exchange. These ratios were measured by analysis of the crude  $^1\text{H-NMR}$  spectra.

#### List of other substrates that failed to react in comparable yields:

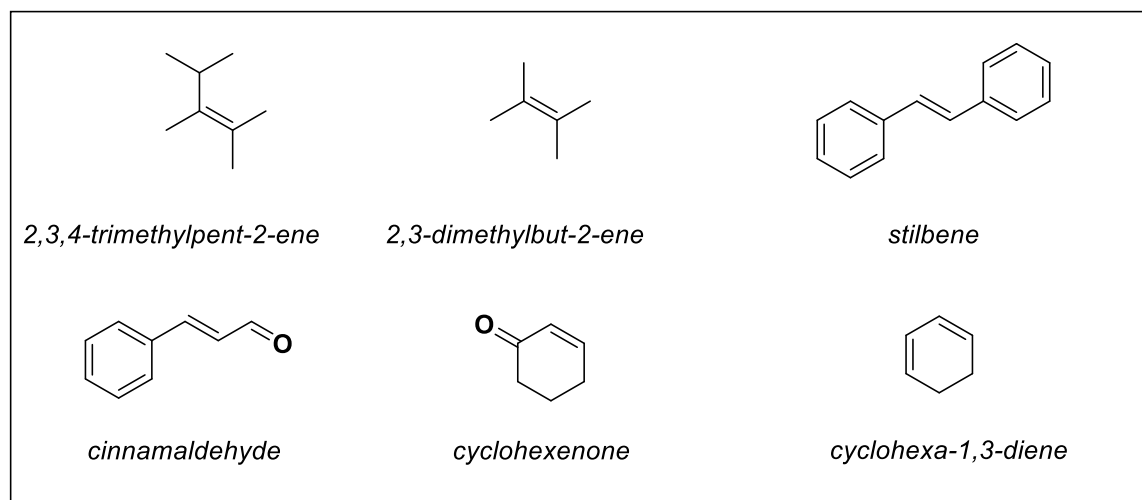

**B. SYNTHESIS OF TUNGSTENOOXAZIRIDINE 1:**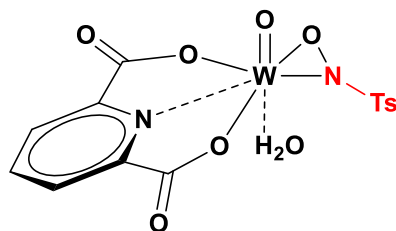

**N-tosyl-Dipic(H<sub>2</sub>O)Tungstenoxaziridine (1):** WO<sub>2</sub>Cl<sub>2</sub> (10 mmol, 1 equiv.) is mixed in CH<sub>2</sub>Cl<sub>2</sub> (0.1M, 100 mL) with Dipic (10 mmol, 1 equiv.) and H<sub>2</sub>O (10 mmol, 1 equiv.) and the resulting heterogeneous mixture allowed to react at rt for 2 hours. The filtrate was then washed with CH<sub>2</sub>Cl<sub>2</sub> and dried under vacuum to obtain residue. Toluenesulfonamide (10 mmol, 1 equiv.) and TCCA (3.35 mmol, 0.33 equiv) were dissolved in CH<sub>2</sub>Cl<sub>2</sub> (0.1M, 100 mL) at 0 °C for 30 min. The resulting crude is then dried under vacuum and then reconstituted in MeOH (0.1M, 100 mL) and then added to the residue **A** and the resulting heterogeneous mixture is then stirred vigorously at rt for 8h. The reaction is then allowed to settle, and the supernatant is removed and another portion of MeOH (100 mL) is added, and the reaction is then stirred at rt for another hour. This step was repeated two more times to provide pure tungstenoxaziridine **1** as green crystals (3.280 g, 6.4 mmol, 64% yield). **MP:** 251-253°C. **<sup>1</sup>H-NMR** (400 MHz, CD<sub>3</sub>OD): δ 8.26-8.24 (m, 2H), 8.10 (t, *J* = 9.3 Hz, 1H), 7.68 (d, *J* = 8.4 Hz, 2H), 7.25 (d, *J* = 8.4, 2H), 2.32 (s, 3H). **<sup>13</sup>C-NMR** (100 MHz, CD<sub>3</sub>OD): δ 165.7, 164.9, 148.2, 147.5, 139.5, 138.9, 127.9, 127.7, 34.1 ppm. **ESI-MS** *m/z* (rel int): (pos) 590.5 ([M+Na]<sup>+</sup>, 100). **Anal.** Calculated for: C<sub>14</sub>H<sub>12</sub>N<sub>2</sub>O<sub>9</sub>SW: C, 29.60; H, 2.13; N, 4.93. Found: C, 29.64; H, 2.24; N, 4.97.

### C. SYNTHESIS OF AMINOALCOHOLS FROM TABLES 2, 3 AND 4:

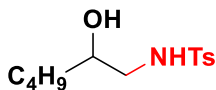

**N-(2-hydroxyhexyl)-4-methylbenzenesulfonamide (3a):** Alkene **2a** (0.1 mmol) reacted under the general method to produce aminoalcohol **3b** as a white solid (24 mg, 0.088 mmol, 88%). **TLC:**  $R_f$ : 0.28 (2:1 heptanes/EtOAc).<sup>2</sup> **IR** (thin film):  $\nu$  3850, 3230, 2950, 1700, 1503, 1340, 1160, 970  $\text{cm}^{-1}$ .  **$^1\text{H-NMR}$**  (400 MHz,  $\text{CDCl}_3$ ):  $\delta$  7.69 (d,  $J = 8.0$  Hz, 2H), 7.24 (d,  $J = 8.0$  Hz, 2H), 5.12 (bs, 1H), 3.63-3.60 (m, 1H), 2.99 (dd,  $J = 8.8, 3.5$  Hz, 1H), 2.71 (dd,  $J = 8.8, 5.3$  Hz, 1H), 2.35 (s 3H), 2.06 (bs, 1H), 1.33-1.33 (m, 2H), 1.23-1.16 (m, 4H), 0.80 (t,  $J = 7.5$  Hz, 3H).  **$^{13}\text{C-NMR}$**  (100 MHz,  $\text{CDCl}_3$ ):  $\delta$  143.6, 136.6, 129.9, 127.2, 70.5, 48.7, 34.3, 27.5, 22.6, 21.6, 14.0 ppm. **ESI-MS**  $m/z$  (rel int): (pos) 272.1 ( $[\text{M}+\text{H}]^+$ , 100); (neg) 270.1 ( $[\text{M}-\text{H}]^-$ , 100). **HRMS** (ESI):  $[\text{M}+\text{H}]^+$  Calculated for:  $\text{C}_{13}\text{H}_{22}\text{NO}_3\text{S}^+$ : 272.13149, found: 272.13158. Absolute difference (ppm): 0.31.

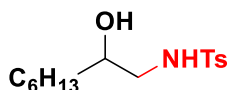

**N-(2-hydroxyoctyl)-4-methylbenzenesulfonamide (3b):** Alkene **2b** (0.1 mmol) reacted under the general method to produce aminoalcohol **3b** as a white solid (27 mg, 0.091 mmol, 91%).<sup>3</sup> **TLC:**  $R_f$ : 0.28 (2:1 heptanes/EtOAc).<sup>3</sup> **IR** (thin film):  $\nu$  3805, 3203, 2932, 1717, 1512, 1331, 1151, 961  $\text{cm}^{-1}$ .  **$^1\text{H-NMR}$**  (400 MHz,  $\text{CDCl}_3$ ):  $\delta$  7.67 (d,  $J = 8.2$  Hz, 2H), 7.21 (d,  $J = 8.2$  Hz, 2H), 5.36 (bs, 1H), 3.62-3.58 (m, 1H), 2.98 (dd,  $J = 8.8, 2.6$  Hz, 1H), 2.71 (dd,  $J = 8.8, 4.8$  Hz, 1H), 2.43 (bs, 1H), 234 (s 3H), 1.29-1.28 (m, 2H), 1.19-1.16 (m, 8H), 0.78 (t,  $J = 7.5$  Hz, 3H).  **$^{13}\text{C-NMR}$**  (100 MHz,  $\text{CDCl}_3$ ):  $\delta$  143.5, 136.6, 129.8, 127.1, 70.5, 48.7, 34.6, 31.7, 29.2, 25.4, 22.6, 21.6, 14.1 ppm. **ESI-MS**  $m/z$  (rel int): (pos) 300.2 ( $[\text{M}+\text{H}]^+$ , 100); (neg) 298.2 ( $[\text{M}-\text{H}]^-$ , 100). **HRMS** (ESI):  $[\text{M}+\text{H}]^+$  Calculated for:  $\text{C}_{15}\text{H}_{26}\text{NO}_3\text{S}^+$ : 300.16279, found: 300.16248. Absolute difference (ppm): 1.03.

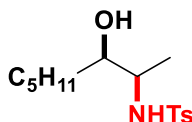

**N-((2R\*,3R\*)-3-hydroxy-2-octyl)-4-methylbenzenesulfonamide (3c):** Alkene **2c** (0.1 mmol) reacted under the general method to produce aminoalcohol **3c** as a white solid (24 mg, 0.082 mmol, 82%). **TLC:**  $R_f$ : 0.26 (2:1 heptanes/EtOAc).<sup>4</sup> **IR** (thin film):  $\nu$  3832, 3212, 2923, 1726, 1521, 1322, 1142, 952  $\text{cm}^{-1}$ .  **$^1\text{H-NMR}$**  (400 MHz,  $\text{CDCl}_3$ ):  $\delta$  7.72 (d,  $J = 8.2$  Hz, 2H), 7.34 (d,  $J = 8.2$  Hz, 2H), 3.61 (dq,  $J = 8.8, 7.1$  Hz, 1H), 3.37 (ddd,  $J = 8.8, 6.4, 4.3$  Hz, 1H), 2.44 (s 3H), 1.38 (d,  $J = 7.1$  Hz, 3H), 1.34-1.32 (m, 1H), 1.16-1.07 (m, 7H), 0.88 (t,  $J = 7.5$  Hz, 3H).  **$^{13}\text{C-NMR}$**  (100 MHz,  $\text{CDCl}_3$ ):  $\delta$  144.4, 135.9, 129.9, 127.2, 72.5, 61.2, 35.7, 24.8, 22.6, 22.4, 21.6, 17.6, 14.1 ppm. **ESI-MS**  $m/z$  (rel int): (pos) 300.2 ( $[\text{M}+\text{H}]^+$ , 100); (neg) 298.2 ( $[\text{M}-\text{H}]^-$ , 100). **HRMS** (ESI):  $[\text{M}+\text{H}]^+$  Calculated for:  $\text{C}_{15}\text{H}_{26}\text{NO}_3\text{S}^+$ : 300.16279, found: 300.16224. Absolute difference (ppm): 1.83.

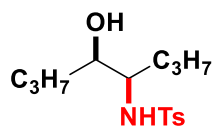

**N-((4R\*,5R\*)-5-hydroxy-4-octyl)-4-methylbenzenesulfonamide (3d):** Alkene **2d** (0.1 mmol) reacted under the general method to produce aminoalcohol **3d** as a white solid (25 mg, 0.084 mmol, 84%). **TLC:**  $R_f$ : 0.32 (2:1 heptanes/EtOAc).<sup>5</sup> **IR** (thin film):  $\nu$  3841, 3221, 2914, 1735, 1503, 1304, 1133, 934  $\text{cm}^{-1}$ .  **$^1\text{H-NMR}$**  (400 MHz,  $\text{CDCl}_3$ ):  $\delta$  7.68 (d,  $J = 8.0$  Hz, 2H), 7.17 (d,  $J = 8.0$  Hz, 2H), 5.59 (d,  $J = 6.4$ , 1H), 3.46-3.43 (m, 1H), 3.05 (ddt,  $J = 6.8, 6.4, 4.8$  Hz, 1H), 2.94 (bs, 1H), 2.30 (s 3H), 1.41-1.37 (m, 2H), 1.27-1.18 (m, 4H), 1.10-1.03 (m, 2H), 0.69 (t,  $J = 7.5$  Hz, 3H), 0.62 (t,  $J = 7.5$  Hz, 3H).  **$^{13}\text{C-NMR}$**  (100 MHz,  $\text{CDCl}_3$ ):  $\delta$  143.0, 138.6, 129.5, 126.9, 72.1, 57.5, 36.0, 34.5, 21.4, 18.9, 13.9, 13.8 ppm. **ESI-MS**  $m/z$  (rel int): (pos) 300.2 ( $[\text{M}+\text{H}]^+$ , 100); (neg) 298.2 ( $[\text{M}-\text{H}]^-$ , 100). **HRMS** (ESI):  $[\text{M}+\text{H}]^+$  Calculated for:  $\text{C}_{15}\text{H}_{26}\text{NO}_3\text{S}^+$ : 300.16279, found: 300.16305. Absolute difference (ppm): 2.35.

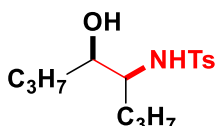

**N-((4S\*,5R\*)-5-hydroxy-4-octyl)-4-methylbenzenesulfonamide (3e):** Alkene **2e** (0.1 mmol) reacted under the general method to produce aminoalcohol **3e** as a white solid (26 mg, 0.088 mmol, 88%). **TLC:**  $R_f$ : 0.32 (2:1 heptanes/EtOAc).<sup>5</sup> **IR** (thin film):  $\nu$  3850, 3203, 2905, 1744, 1512, 1313, 1124, 943  $\text{cm}^{-1}$ .  **$^1\text{H-NMR}$**  (400 MHz,  $\text{CDCl}_3$ ):  $\delta$  7.72 (d,  $J = 8.0$  Hz, 2H), 7.21 (d,  $J = 8.0$  Hz, 2H), 5.46 (d,  $J = 6.4$ , 1H), 3.47-3.43 (m, 1H), 3.10 (dt,  $J = 7.1, 5.3$  Hz, 1H), 2.33 (s 3H), 1.38-1.34 (m, 3H), 1.27-1.19 (m, 4H), 0.92-0.88 (m, 1H), 0.77 (t,  $J = 7.5$  Hz, 3H), 0.62 (t,  $J = 7.5$  Hz, 3H).  **$^{13}\text{C-NMR}$**  (100 MHz,  $\text{CDCl}_3$ ):  $\delta$  143.3, 137.8, 129.6, 127.1, 73.4, 58.1, 34.9, 30.8, 21.5, 19.2, 18.9, 13.9, 13.7 ppm. **ESI-MS**  $m/z$  (rel int): (pos) 300.2 ( $[\text{M}+\text{H}]^+$ , 100); (neg) 298.2 ( $[\text{M}-\text{H}]^-$ , 100). **HRMS** (ESI):  $[\text{M}+\text{H}]^+$  Calculated for:  $\text{C}_{15}\text{H}_{26}\text{NO}_2\text{S}^+$ : 300.16279, found: 300.16233. Absolute difference (ppm): 1.52.

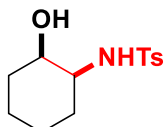

**N-((1S\*,2R\*)-2-hydroxycyclohexyl)-4-methylbenzenesulfonamide (3f):** Alkene **2f** (0.1 mmol) reacted under the general method to produce aminoalcohol **3f** as a white solid (25 mg, 0.093 mmol, 93%). **TLC:**  $R_f$ : 0.035 (2:1 heptanes/EtOAc).<sup>2</sup> **IR** (thin film):  $\nu$  3832, 3230, 2950, 1708, 1503, 1313, 1124, 971  $\text{cm}^{-1}$ .  **$^1\text{H-NMR}$**  (400 MHz,  $\text{CDCl}_3$ ):  $\delta$  7.72 (d,  $J = 8.0$  Hz, 2H), 7.25 (d,  $J = 8.0$  Hz, 2H), 4.77 (d,  $J = 4.8$  Hz, 1H), 3.72 (dt,  $J = 6.8, 3.5$  Hz, 1H), 3.15 (dt,  $J = 5.8, 3.5$  Hz, 1H), 2.36 (s 3H), 1.61-1.52 (m, 6H), 1.34-1.25 (m, 2H).  **$^{13}\text{C-NMR}$**  (100 MHz,  $\text{CDCl}_3$ ):  $\delta$  143.1, 137.5, 129.8, 127.1, 68.8, 55.1, 31.5, 28.0, 23.6, 21.6, 19.8 ppm. **ESI-MS**  $m/z$  (rel int): (pos) 270.1

( $[M+H]^+$ , 100); (neg) 268.1 ( $[M-H]^-$ , 100). **HRMS** (ESI):  $[M+H]^+$  Calculated for:  $C_{13}H_{20}NO_3S^+$ : 270.11584, found: 270.11564. Absolute difference (ppm): 0.74.

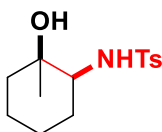

**N-((1S\*,2S\*)-2-hydroxy-2-methylcyclohexyl)-4-methylbenzenesulfonamide (3g)**: Alkene **2g** (0.1 mmol) reacted under the general method to produce aminoalcohol **3g** as a white solid (26 mg, 0.091 mmol, 91%). **TLC**:  $R_f$ : 0.35 (2:1 heptanes/EtOAc).<sup>6</sup> **IR** (thin film):  $\nu$  3823, 3212, 2941, 1717, 1521, 1331, 1142, 962  $cm^{-1}$ . **<sup>1</sup>H-NMR** (400 MHz,  $CDCl_3$ ):  $\delta$  7.69 (d,  $J = 8.2$  Hz, 2H), 7.21 (d,  $J = 8.2$  Hz, 2H), 5.03 (d,  $J = 3.5$ , 1H), 2.94 (ddd,  $J = 8.2, 4.0, 3.5$  Hz, 1H), 2.34 (s 3H), 1.70 (bs, 1H), 1.64-1.61 (m, 1H), 1.52-1.47 (m, 1H), 1.36-1.32 (m, 6H), 1.07 (s, 3H). **<sup>13</sup>C-NMR** (100 MHz,  $CDCl_3$ ):  $\delta$  143.1, 138.6, 129.6, 126.9, 71.4, 59.2, 38.9, 29.6, 27.8, 24.6, 21.6, 20.9 ppm. **ESI-MS**  $m/z$  (rel int): (pos) 284.1 ( $[M+H]^+$ , 100); (neg) 282.1 ( $[M-H]^-$ , 100). **HRMS** (ESI):  $[M+H]^+$  Calculated for:  $C_{14}H_{22}NO_3S^+$ : 284.13149, found: 284.13161. Absolute difference (ppm): 0.42.

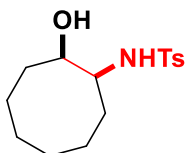

**N-((1S\*,2R\*)-2-hydroxycyclooctyl)-4-methylbenzenesulfonamide (3h)**: Alkene **2h** (0.1 mmol) reacted under the general method to produce aminoalcohol **3h** as a white solid (28 mg, 0.095 mmol, 95%). **TLC**:  $R_f$ : 0.36 (2:1 heptanes/EtOAc). **IR** (thin film):  $\nu$  3841, 3230, 2914, 1771, 1530, 1340, 1160, 926  $cm^{-1}$ . **<sup>1</sup>H-NMR** (400 MHz,  $CDCl_3$ ):  $\delta$  7.78 (d,  $J = 8.2$  Hz, 2H), 7.30 (d,  $J = 8.2$  Hz, 2H), 5.03 (d,  $J = 2.8$ , 1H), 3.96 (td,  $J = 5.3, 3.3$  Hz, 1H), 3.41 (td,  $J = 5.1, 3.3$  Hz, 1H), 2.40 (s 3H), 2.18-1.96 (m, 3H), 1.85-1.75 (m, 5H), 1.76-1.72 (m, 2H), 1.52-1.47 (m, 2H). **<sup>13</sup>C-NMR** (100 MHz,  $CDCl_3$ ):  $\delta$  143.5, 136.7, 129.6, 127.6, 65.7, 60.6, 31.9, 31.3, 25.6, 25.4, 25.3, 23.9, 21.6 ppm. **ESI-MS**  $m/z$  (rel int): (pos) 298.2 ( $[M+H]^+$ , 100); (neg) 296.2 ( $[M-H]^-$ , 100). **HRMS** (ESI):  $[M+H]^+$  Calculated for:  $C_{15}H_{24}NO_3S^+$ : 298.14714, found: 298.14727. Absolute difference (ppm): 0.44.

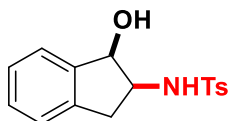

**N-((1R\*,2S\*)-1-hydroxy-2,3-dihydro-1H-inden-2-yl)-4-methylbenzenesulfonamide (3i)**: Alkene **2i** (0.1 mmol) reacted under the general method to produce aminoalcohol **3i** as a pale yellow solid (28 mg, 0.092 mmol, 92%). **TLC**:  $R_f$ : 0.42 (2:1 heptanes/EtOAc).<sup>6</sup> **IR** (thin film):  $\nu$  3804, 3207, 2925, 1780, 1520, 1348, 1160, 962  $cm^{-1}$ . **<sup>1</sup>H-NMR** (400 MHz,  $CDCl_3$ ):  $\delta$  7.88 (d,  $J = 8.2$  Hz, 2H), 7.36 (d,  $J = 8.2$  Hz, 2H), 7.24-7.21 (m, 4H), 5.36 (d,  $J = 6.2$  Hz, 1H), 5.03 (dd,  $J = 6.2, 3.5$  Hz, 1H), 4.46 (td,  $J = 4.4, 3.5$  Hz, 1H), 3.29 (dd,  $J = 16.1, 6.4$  Hz, 1H), 3.14 (dd,  $J = 16.1, 2.4$  Hz, 1H) 2.46 (s, 3H). **<sup>13</sup>C-NMR** (100 MHz,  $CDCl_3$ ):  $\delta$  143.9, 138.7, 137.9, 137.8, 130.0, 128.7, 127.6, 127.3, 125.2, 124.4, 65.3, 61.4, 40.6, 21.5 ppm. **ESI-MS**  $m/z$  (rel int): (pos) 304.1 ( $[M+H]^+$ ,

100); (neg) 302.1 ( $[M-H]^-$ , 100). **HRMS** (ESI):  $[M+H]^+$  Calculated for:  $C_{16}H_{18}NO_3S^+$ : 304.10019, found: 304.10044. Absolute difference (ppm): 0.82.

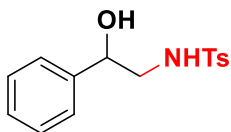

**N-(2-hydroxy-2-phenylethyl)-4-methylbenzenesulfonamide (3j)**: Alkene **2j** (0.1 mmol) reacted under the general method to produce aminoalcohol **3j** as a white solid (26 mg, 0.091 mmol, 91%). **TLC**:  $R_f$ : 0.40 (2:1 heptanes/EtOAc).<sup>2</sup> **IR** (thin film):  $\nu$  3841, 3221, 2941, 1762, 1521, 1344, 1142, 961  $cm^{-1}$ .  **$^1H$ -NMR** (400 MHz,  $CDCl_3$ ):  $\delta$  7.63 (d,  $J$  = 8.2 Hz, 2H), 7.25-7.19 (m, 7H), 5.03 (bs, 1H), 4.73 (dd,  $J$  = 6.4, 4.8 Hz, 1H), 3.18-3.15 (m, 1H), 2.95 (ddd,  $J$  = 6.4, 5.8, 4.8 Hz, 1H), 2.35 (s, 3H).  **$^{13}C$ -NMR** (100 MHz,  $CDCl_3$ ):  $\delta$  143.7, 140.8, 136.6, 129.9, 128.7, 128.3, 127.1, 125.8, 72.8, 50.2, 21.6 ppm. **ESI-MS**  $m/z$  (rel int): (pos) 292.1 ( $[M+H]^+$ , 100); (neg) 290.1 ( $[M-H]^-$ , 100). **HRMS** (ESI):  $[M+H]^+$  Calculated for:  $C_{15}H_{18}NO_3S^+$ : 292.10019, found: 292.10026. Absolute difference (ppm): 1.24.

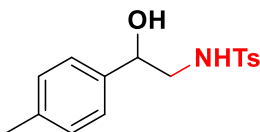

**N-(2-hydroxy-2-(p-tolyl)ethyl)-4-methylbenzenesulfonamide (3k)**: Alkene **2k** (0.1 mmol) reacted under the general method to produce aminoalcohol **3k** as a white solid (27 mg, 0.088 mmol, 88%). **TLC**:  $R_f$ : 0.53 (2:1 heptanes/EtOAc).<sup>7</sup> **IR** (thin film):  $\nu$  3850, 3230, 2981, 1755, 1555, 1304, 1124, 943  $cm^{-1}$ .  **$^1H$ -NMR** (400 MHz,  $CDCl_3$ ):  $\delta$  7.63 (d,  $J$  = 8.0 Hz, 2H), 7.21 (d,  $J$  = 8.0 Hz, 2H), 7.08-7.06 (m, 4H), 5.03 (dd,  $J$  = 3.5, 3.2, 1H), 4.69 (dd,  $J$  = 8.2, 6.2 Hz, 1H), 3.16 (ddd,  $J$  = 8.2, 7.1, 3.5 Hz, 1H), 2.93 (ddd,  $J$  = 7.1, 6.2, 3.2 Hz, 1H), 2.36 (s, 3H), 2.25 (s, 3H).  **$^{13}C$ -NMR** (100 MHz,  $CDCl_3$ ):  $\delta$  143.6, 138.1, 137.8, 136.7, 129.8, 129.4, 127.1, 126.5, 72.6, 50.2, 21.6, 21.1 ppm. **ESI-MS**  $m/z$  (rel int): (pos) 306.1 ( $[M+H]^+$ , 100); (neg) 304.1 ( $[M-H]^-$ , 100). **HRMS** (ESI):  $[M+H]^+$  Calculated for:  $C_{16}H_{20}NO_3S^+$ : 306.11584, found: 306.11562. Absolute difference (ppm): 0.69.

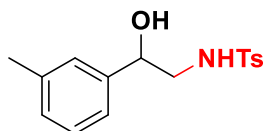

**N-(2-hydroxy-2-(m-tolyl)ethyl)-4-methylbenzenesulfonamide (3l)**: Alkene **2l** (0.1 mmol) reacted under the general method to produce aminoalcohol **3l** as a white solid (27 mg, 0.089 mmol, 89%). **TLC**:  $R_f$ : 0.53 (2:1 heptanes/EtOAc).<sup>7</sup> **IR** (thin film):  $\nu$  3841, 3203, 2981, 1753, 1555, 1322, 1140, 952  $cm^{-1}$ .  **$^1H$ -NMR** (400 MHz,  $CDCl_3$ ):  $\delta$  7.64 (d,  $J$  = 8.0 Hz, 2H), 7.18 (d,  $J$  = 8.0

Hz, 2H), 7.10-7.08 (m, 1H), 6.99-6.96 (m, 3H), 5.36 (dd,  $J = 3.5, 3.2$ , 1H), 4.66 (dd,  $J = 8.2, 6.2$  Hz, 1H), 3.14 (ddd,  $J = 8.2, 7.1, 3.5$  Hz, 1H), 2.91 (ddd,  $J = 7.1, 6.2, 3.2$  Hz, 1H), 2.32 (s, 3H), 2.22 (s, 3H).  $^{13}\text{C-NMR}$  (100 MHz,  $\text{CDCl}_3$ ):  $\delta$  143.6, 140.8, 138.4, 136.7, 129.8, 128.9, 128.5, 127.1, 126.6, 122.9, 72.8, 50.3, 21.6, 21.4 ppm. **ESI-MS**  $m/z$  (rel int): (pos) 306.1 ( $[\text{M}+\text{H}]^+$ , 100); (neg) 304.1 ( $[\text{M}-\text{H}]^-$ , 100). **HRMS** (ESI):  $[\text{M}+\text{H}]^+$  Calculated for:  $\text{C}_{16}\text{H}_{20}\text{NO}_3\text{S}^+$ : 306.11584, found: 306.11553. Absolute difference (ppm): 1.01.

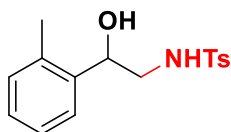

**N-(2-hydroxy-2-(o-tolyl)ethyl)-4-methylbenzenesulfonamide (3m)**: Alkene **2m** (0.1 mmol) reacted under the general method to produce aminoalcohol **3m** as a white solid (26 mg, 0.086 mmol, 86%). **TLC**:  $R_f$ : 0.53 (2:1 heptanes/EtOAc).<sup>7</sup> **IR** (thin film):  $\nu$  3839, 3230, 2918, 1735, 1551, 1322, 1142, 953  $\text{cm}^{-1}$ .  $^1\text{H-NMR}$  (400 MHz,  $\text{CDCl}_3$ ):  $\delta$  7.66 (d,  $J = 8.0$  Hz, 2H), 7.32-7.30 (m, 1H), 7.21 (d,  $J = 8.0$  Hz, 2H), 7.08-7.06 (m, 2H), 7.01-6.99 (m, 1H), 5.51 (dd,  $J = 3.5, 3.2$ , 1H), 4.93 (dd,  $J = 8.2, 6.2$  Hz, 1H), 3.09 (ddd,  $J = 8.2, 7.1, 3.5$  Hz, 1H), 2.84 (ddd,  $J = 7.1, 6.2, 3.2$  Hz, 1H), 2.33 (s, 3H), 2.15 (s, 3H).  $^{13}\text{C-NMR}$  (100 MHz,  $\text{CDCl}_3$ ):  $\delta$  143.6, 139.0, 136.8, 134.6, 130.5, 129.8, 127.9, 127.1, 126.4, 125.4, 69.6, 49.2, 21.6, 18.9 ppm. **ESI-MS**  $m/z$  (rel int): (pos) 306.1 ( $[\text{M}+\text{H}]^+$ , 100); (neg) 304.1 ( $[\text{M}-\text{H}]^-$ , 100). **HRMS** (ESI):  $[\text{M}+\text{H}]^+$  Calculated for:  $\text{C}_{16}\text{H}_{20}\text{NO}_3\text{S}^+$ : 306.11584, found: 306.11535. Absolute difference (ppm): 1.6.

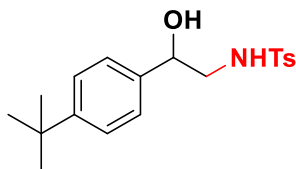

**N-(2-(4-(tert-butyl)phenyl)-2-hydroxyethyl)-4-methylbenzenesulfonamide (3n)**: Alkene **2n** (0.1 mmol) reacted under the general method to produce aminoalcohol **3n** as a white solid (31 mg, 0.090 mmol, 90%). **TLC**:  $R_f$ : 0.58 (2:1 heptanes/EtOAc). **IR** (thin film):  $\nu$  3850, 3234, 2983, 1748, 1555, 1322, 1142, 934  $\text{cm}^{-1}$ .  $^1\text{H-NMR}$  (400 MHz,  $\text{CDCl}_3$ ):  $\delta$  7.66 (d,  $J = 8.0$  Hz, 2H), 7.28 (d,  $J = 8.0$  Hz, 2H), 7.22 (d,  $J = 8.0$  Hz, 2H), 7.12 (d,  $J = 8.0$  Hz, 2H), 5.13 (bs, 1H), 4.69 (d,  $J = 6.4, 3.2$  Hz, 1H), 3.14 (ddd,  $J = 7.1, 6.4, 4.0$  Hz, 1H), 2.93 (ddd,  $J = 7.1, 4.0, 3.2$  Hz, 2H), 2.34 (s, 3H), 1.22 (s, 9H).  $^{13}\text{C-NMR}$  (100 MHz,  $\text{CDCl}_3$ ):  $\delta$  151.3, 143.6, 137.8, 136.7, 129.8, 127.2, 125.7, 125.6, 72.6, 50.1, 34.6, 31.3, 21.6 ppm. **ESI-MS**  $m/z$  (rel int): (pos) 348.2 ( $[\text{M}+\text{H}]^+$ , 100); (neg) 346.2 ( $[\text{M}-\text{H}]^-$ , 100). **HRMS** (ESI):  $[\text{M}+\text{H}]^+$  Calculated for:  $\text{C}_{19}\text{H}_{26}\text{NO}_3\text{S}^+$ : 348.16279, found: 348.16288. Absolute difference (ppm): 0.26.

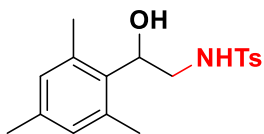

**N-(2-hydroxy-2-mesitylethyl)-4-methylbenzenesulfonamide (3o)**: Alkene **2o** (0.1 mmol) reacted under the general method to produce aminoalcohol **3o** as a white solid (29 mg, 0.086 mmol,

86%). **TLC**:  $R_f$ : 0.56 (2:1 heptanes/EtOAc). **IR** (thin film):  $\nu$  3805, 3230, 2981, 1744, 1551, 1322, 1133, 970  $\text{cm}^{-1}$ .  **$^1\text{H-NMR}$**  (400 MHz,  $\text{CDCl}_3$ ):  $\delta$  7.55 (d,  $J = 8.0$  Hz, 2H), 7.16 (d,  $J = 8.0$  Hz, 2H), 6.68 (s, 2H), 5.21 (bs, 1H), 4.88 (dt,  $J = 6.8, 6.4$  Hz, 1H), 3.92 (dd,  $J = 6.8, 6.2$  Hz, 1H), 3.72 (dd,  $J = 6.8, 6.4$  Hz, 1H), 2.37 (s, 3H), 2.19 (s, 9H).  **$^{13}\text{C-NMR}$**  (100 MHz,  $\text{CDCl}_3$ ):  $\delta$  143.5, 137.9, 136.4, 129.9, 129.3, 127.2, 55.2, 45.1, 21.5, 20.7 ppm. **ESI-MS**  $m/z$  (rel int): (pos) 334.2 ( $[\text{M}+\text{H}]^+$ , 100); (neg) 332.2 ( $[\text{M}-\text{H}]^-$ , 100). **HRMS** (ESI):  $[\text{M}+\text{H}]^+$  Calculated for:  $\text{C}_{18}\text{H}_{24}\text{NO}_3\text{S}^+$ : 334.14714, found: 334.14744. Absolute difference (ppm): 0.89.

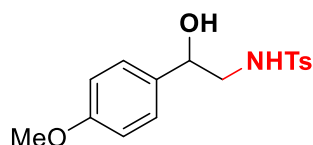

**N-(2-hydroxy-2-(4-methoxyphenyl)ethyl)-4-methylbenzenesulfonamide (3p)**: Alkene **2p** (0.1 mmol) reacted under the general method to produce aminoalcohol **3p** as a white solid (26 mg, 0.088 mmol, 88%). **TLC**:  $R_f$ : 0.24 (2:1 heptanes/EtOAc).<sup>6</sup> **IR** (thin film):  $\nu$  3832, 3212, 2983, 1751, 1551, 1322, 1142, 952  $\text{cm}^{-1}$ .  **$^1\text{H-NMR}$**  (400 MHz,  $\text{CDCl}_3$ ):  $\delta$  7.74 (d,  $J = 8.0$  Hz, 2H), 7.30 (d,  $J = 8.0$  Hz, 2H), 7.21 (d,  $J = 8.0$  Hz, 2H), 6.86 (d,  $J = 8.0$  Hz, 2H), 5.47 (dd,  $J = 4.8, 4.4$  Hz, 1H), 4.75 (dd,  $J = 6.8, 6.2$  Hz, 1H), 3.79 (s, 3H), 3.18 (ddd,  $J = 7.1, 6.8, 4.8$  Hz, 1H), 3.01 (ddd,  $J = 7.1, 6.2, 4.4$  Hz, 1H), 2.43 (s, 3H).  **$^{13}\text{C-NMR}$**  (100 MHz,  $\text{CDCl}_3$ ):  $\delta$  159.5, 143.6, 136.6, 132.9, 129.8, 127.2, 127.1, 114.0, 72.4, 55.3, 50.2, 21.6 ppm. **ESI-MS**  $m/z$  (rel int): (pos) 322.1 ( $[\text{M}+\text{H}]^+$ , 100); (neg) 320.1 ( $[\text{M}-\text{H}]^-$ , 100). **HRMS** (ESI):  $[\text{M}+\text{H}]^+$  Calculated for:  $\text{C}_{16}\text{H}_{20}\text{NO}_4\text{S}^+$ : 322.11076, found: 322.11088. Absolute difference (ppm): 0.37.

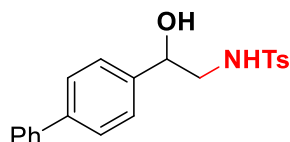

**N-(2-([1,1'-biphenyl]-4-yl)-2-hydroxyethyl)-4-methylbenzenesulfonamide (3q)**: Alkene **2q** (0.1 mmol) reacted under the general method to produce aminoalcohol **3q** as a white solid (31 mg, 0.084 mmol, 84%).<sup>6</sup> **TLC**:  $R_f$ : 0.57 (2:1 heptanes/EtOAc). **IR** (thin film):  $\nu$  3841, 3232, 2974, 1744, 1555, 1340, 1124, 961  $\text{cm}^{-1}$ .  **$^1\text{H-NMR}$**  (400 MHz,  $\text{CDCl}_3$ ):  $\delta$  7.63 (d,  $J = 8.0$  Hz, 2H), 7.53-7.51 (m, 2H), 7.46-7.41 (m, 4H), 7.36-7.34 (m, 1H), 7.21 (d,  $J = 8.0$  Hz, 4H), 5.21 (d,  $J = 4.8$  Hz, 1H), 4.64 (dt,  $J = 6.4, 4.8$  Hz, 1H), 3.76 (d,  $J = 6.4$  Hz, 2H), 2.37 (s, 3H).  **$^{13}\text{C-NMR}$**  (100 MHz,  $\text{CDCl}_3$ ):  $\delta$  143.7, 143.6, 141.4, 140.4, 136.9, 136.1, 129.6, 128.9, 127.6, 127.4, 127.1, 127.0, 58.1, 47.9, 21.5 ppm. **ESI-MS**  $m/z$  (rel int): (pos) 368.1 ( $[\text{M}+\text{H}]^+$ , 100); (neg) 366.1 ( $[\text{M}-\text{H}]^-$ , 100). **HRMS** (ESI):  $[\text{M}+\text{H}]^+$  Calculated for:  $\text{C}_{21}\text{H}_{22}\text{NO}_3\text{S}^+$ : 368.13149, found: 368.13171. Absolute difference (ppm): 0.59.

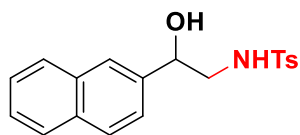

**N-(2-hydroxy-2-(naphthalen-2-yl)ethyl)-4-methylbenzenesulfonamide (3r)**: Alkene **2r** (0.1 mmol) reacted under the general method to produce aminoalcohol **3r** as a white solid (27 mg,



0.080 mmol, 80%). **TLC**:  $R_f$ : 0.55 (2:1 heptanes/EtOAc).<sup>8</sup> **IR** (thin film):  $\nu$  3850, 3234, 2972, 1748, 1555, 1340, 1142, 952  $\text{cm}^{-1}$ .  **$^1\text{H-NMR}$**  (400 MHz,  $\text{CDCl}_3$ ):  $\delta$  7.78-7.75 (m, 1H), 7.71-7.67 (m, 2H), 7.58 (d,  $J = 8.2$  Hz, 2H), 7.53 (s, 1H), 7.47-7.43 (m, 2H), 7.21 (d,  $J = 8.0$  Hz, 1H), 7.07 (d,  $J = 8.2$  Hz, 2H), 4.91 (dd,  $J = 6.4, 5.3$  Hz, 2H), 3.28 (dd,  $J = 6.4, 6.2$  Hz, 1H), 3.05 (dd,  $J = 6.2, 5.3$  Hz, 1H), 2.33 (s, 3H).  **$^{13}\text{C-NMR}$**  (100 MHz,  $\text{CDCl}_3$ ):  $\delta$  143.6, 133.1, 129.8, 129.7, 128.5, 128.0, 127.7, 127.1, 126.4, 126.2, 124.9, 123.7, 72.8, 50.1, 21.5 ppm. **ESI-MS**  $m/z$  (rel int): (pos) 342.1 ( $[\text{M}+\text{H}]^+$ , 100); (neg) 340.1 ( $[\text{M}-\text{H}]^-$ , 100). **HRMS** (ESI):  $[\text{M}+\text{H}]^+$  Calculated for:  $\text{C}_{19}\text{H}_{20}\text{NO}_3\text{S}^+$ : 342.11584, found: 342.11531. Absolute difference (ppm): 1.55.

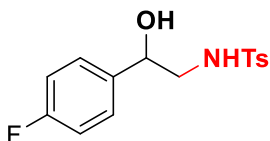

**N-(2-(4-fluorophenyl)-2-hydroxyethyl)-4-methylbenzenesulfonamide (3s)**: Alkene **2s** (0.1 mmol) reacted under the general method to produce aminoalcohol **3s** as a white solid (25 mg, 0.082 mmol, 82%). **TLC**:  $R_f$ : 0.42 (2:1 heptanes/EtOAc).<sup>6</sup> **IR** (thin film):  $\nu$  3841, 3221, 2941, 1704, 1506, 1344, 1164, 972  $\text{cm}^{-1}$ .  **$^1\text{H-NMR}$**  (400 MHz,  $\text{CDCl}_3$ ):  $\delta$  7.66 (d,  $J = 8.0$  Hz, 2H), 7.24-7.17 (m, 4H), 6.94 (t,  $J = 8.0$  Hz, 2H), 4.97 (dd,  $J = 4.8, 4.4$  Hz, 1H), 4.75 (dd,  $J = 6.8, 6.2$  Hz, 1H), 3.16 (ddd,  $J = 7.1, 6.8, 4.8$  Hz, 1H), 2.91 (ddd,  $J = 7.1, 6.2, 4.4$  Hz, 1H), 2.36 (s, 3H).  **$^{13}\text{C-NMR}$**  (100 MHz,  $\text{CDCl}_3$ ):  $\delta$  162.2 (d,  $J = 251$  Hz), 143.8, 136.6, 130.1, 129.5, 127.7 (d,  $J = 3.5$  Hz), 126.5, 115.5 (d,  $J = 22.4$  Hz), 72.2, 50.2, 21.5 ppm. **ESI-MS**  $m/z$  (rel int): (pos) 310.1 ( $[\text{M}+\text{H}]^+$ , 100); (neg) 308.1 ( $[\text{M}-\text{H}]^-$ , 100). **HRMS** (ESI):  $[\text{M}+\text{H}]^+$  Calculated for:  $\text{C}_{15}\text{H}_{17}\text{FNO}_3\text{S}^+$ : 310.09077, found: 310.09088. Absolute difference (ppm): 0.35.

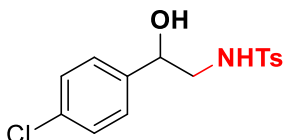

**N-(2-(4-chlorophenyl)-2-hydroxyethyl)-4-methylbenzenesulfonamide (3t)**: Alkene **2t** (0.1 mmol) reacted under the general method to produce aminoalcohol **3t** as a white solid (26 mg, 0.080 mmol, 80%). **TLC**:  $R_f$ : 0.44 (2:1 heptanes/EtOAc).<sup>6</sup> **IR** (thin film):  $\nu$  3848, 3212, 2988, 1704, 1560, 1344, 1146, 952  $\text{cm}^{-1}$ .  **$^1\text{H-NMR}$**  (400 MHz,  $\text{CDCl}_3$ ):  $\delta$  7.63 (d,  $J = 8.0$  Hz, 2H), 7.21-7.13 (m, 6H), 5.36 (dd,  $J = 4.8, 4.4$  Hz, 1H), 4.71 (dd,  $J = 6.8, 6.2$  Hz, 1H), 3.14 (ddd,  $J = 7.1, 6.8, 4.8$  Hz, 1H), 2.88 (ddd,  $J = 7.1, 6.2, 4.4$  Hz, 1H), 2.33 (s, 3H).  **$^{13}\text{C-NMR}$**  (100 MHz,  $\text{CDCl}_3$ ):  $\delta$  143.8, 139.3, 136.4, 133.9, 129.9, 128.7, 127.3, 127.0, 72.1, 50.2, 21.6 ppm. **ESI-MS**  $m/z$  (rel int): (pos) 326.1 ( $[\text{M}+\text{H}]^+$ , 100); (neg) 324.1 ( $[\text{M}-\text{H}]^-$ , 100). **HRMS** (ESI):  $[\text{M}+\text{H}]^+$  Calculated for:  $\text{C}_{15}\text{H}_{17}\text{ClNO}_3\text{S}^+$ : 326.06122, found: 326.06153. Absolute difference (ppm): 0.95.

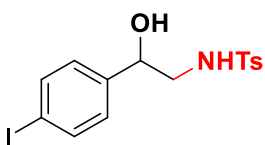

**N-(2-hydroxy-2-(4-iodophenyl)ethyl)-4-methylbenzenesulfonamide (3u):** Alkene **2u** (0.1 mmol) reacted under the general method to produce aminoalcohol **3u** as a white solid (29 mg, 0.086 mmol, 86%). **TLC:**  $R_f$ : 0.46 (2:1 heptanes/EtOAc). **IR** (thin film):  $\nu$  3814, 3226, 2944, 1708, 1560, 1308, 1164, 953  $\text{cm}^{-1}$ .  **$^1\text{H-NMR}$**  (400 MHz,  $\text{CDCl}_3$ ):  $\delta$  7.63 (d,  $J = 8.0$  Hz, 2H), 7.35 (d,  $J = 8.0$  Hz, 2H), 7.21 (d,  $J = 8.0$  Hz, 2H), 7.07 (d,  $J = 8.0$  Hz, 2H), 5.29 (dd,  $J = 4.8, 4.4$  Hz, 1H), 4.71 (dd,  $J = 6.8, 6.2$  Hz, 1H), 3.12 (ddd,  $J = 7.1, 6.8, 4.8$  Hz, 1H), 2.88 (ddd,  $J = 7.1, 6.2, 4.4$  Hz, 1H), 2.35 (s, 3H).  **$^{13}\text{C-NMR}$**  (100 MHz,  $\text{CDCl}_3$ ):  $\delta$  143.8, 139.8, 136.5, 131.7, 129.2, 127.6, 127.1, 122.1, 72.2, 50.0, 21.6 ppm. **ESI-MS**  $m/z$  (rel int): (pos) 418.0 ( $[\text{M}+\text{H}]^+$ , 100); (neg) 416.0 ( $[\text{M}-\text{H}]^-$ , 100). **HRMS** (ESI):  $[\text{M}+\text{H}]^+$  Calculated for:  $\text{C}_{15}\text{H}_{17}\text{INO}_3\text{S}^+$ : 417.99683, found: 417.99602. Absolute difference (ppm): 1.93.

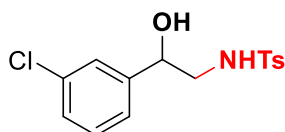

**N-(2-(3-chlorophenyl)-2-hydroxyethyl)-4-methylbenzenesulfonamide (3v):** Alkene **2v** (0.1 mmol) reacted under the general method to produce aminoalcohol **3v** as a white solid (29 mg, 0.089 mmol, 89%). **TLC:**  $R_f$ : 0.41 (2:1 heptanes/EtOAc). **IR** (thin film):  $\nu$  3841, 3234, 2932, 1744, 1513, 1340, 1124, 952  $\text{cm}^{-1}$ .  **$^1\text{H-NMR}$**  (400 MHz,  $\text{CDCl}_3$ ):  $\delta$  7.64 (d,  $J = 8.0$  Hz, 2H), 7.20-7.18 (m, 3H), 7.14 (d,  $J = 8.0$  Hz, 2H), 7.08-7.07 (m, 1H), 5.85 (bs, 1H), 4.68 (dd,  $J = 6.8, 6.2$  Hz, 1H), 3.41 (bs, 1H), 3.08 (ddd,  $J = 7.1, 6.8, 4.6$  Hz, 1H), 2.88 (ddd,  $J = 7.1, 6.2, 4.2$  Hz, 1H), 2.29 (s, 3H).  **$^{13}\text{C-NMR}$**  (100 MHz,  $\text{CDCl}_3$ ):  $\delta$  143.8, 132.9, 136.4, 134.5, 129.9, 129.0, 128.2, 127.1, 126.1, 124.1, 72.2, 50.2, 21.6 ppm. **ESI-MS**  $m/z$  (rel int): (pos) 326.1 ( $[\text{M}+\text{H}]^+$ , 100); (neg) 324.1 ( $[\text{M}-\text{H}]^-$ , 100). **HRMS** (ESI):  $[\text{M}+\text{H}]^+$  Calculated for:  $\text{C}_{15}\text{H}_{17}\text{ClNO}_3\text{S}^+$ : 326.06122, found: 326.06134. Absolute difference (ppm): 0.37.

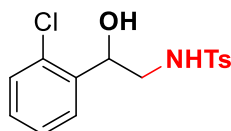

**N-(2-(2-chlorophenyl)-2-hydroxyethyl)-4-methylbenzenesulfonamide (3w):** Alkene **2w** (0.1 mmol) reacted under the general method to produce aminoalcohol **3w** as a white solid (27 mg, 0.084 mmol, 84%). **TLC:**  $R_f$ : 0.41 (2:1 heptanes/EtOAc).<sup>7</sup> **IR** (thin film):  $\nu$  3850, 3230, 2970, 1708, 1531, 1344, 1142, 961  $\text{cm}^{-1}$ .  **$^1\text{H-NMR}$**  (400 MHz,  $\text{CDCl}_3$ ):  $\delta$  7.76 (d,  $J = 8.2$  Hz, 2H), 7.59-

7.55 (m, 1H), 7.28-7.21 (m, 5H), 5.17 (dd,  $J = 8.2, 6.4$  Hz, 1H), 3.41 (dd,  $J = 8.2, 4.0$  Hz, 1H), 2.97 (dd,  $J = 6.4, 4.0$  Hz, 1H), 2.42 (s, 3H).  **$^{13}\text{C-NMR}$**  (100 MHz,  $\text{CDCl}_3$ ):  $\delta$  143.7, 138.2, 136.6, 131.4, 129.8, 129.4, 129.1, 127.5, 127.2, 69.5, 48.4, 21.5 ppm. **ESI-MS**  $m/z$  (rel int): (pos) 326.1 ( $[\text{M}+\text{H}]^+$ , 100); (neg) 324.1 ( $[\text{M}-\text{H}]^-$ , 100). **HRMS** (ESI):  $[\text{M}+\text{H}]^+$  Calculated for:  $\text{C}_{15}\text{H}_{17}\text{ClNO}_3\text{S}^+$ : 326.06122, found: 326.06143. Absolute difference (ppm): 0.64.

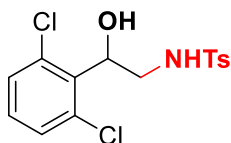

**N-(2-(2,6-dichlorophenyl)-2-hydroxyethyl)-4-methylbenzenesulfonamide (3x):** Alkene **2x** (0.1 mmol) reacted under the general method to produce aminoalcohol **3x** as a white solid (33 mg, 0.091 mmol, 91%). **TLC:**  $R_f$ : 0.42 (2:1 heptanes/EtOAc). **IR** (thin film):  $\nu$  3843, 3236, 2934, 1742, 1511, 1322, 1126, 943  $\text{cm}^{-1}$ .  **$^1\text{H-NMR}$**  (400 MHz,  $\text{CDCl}_3$ ):  $\delta$  7.72 (d,  $J = 8.2$  Hz, 2H), 7.30-7.25 (m, 4H), 7.16 (t,  $J = 8.0$  Hz, 1H), 5.78 (dd,  $J = 6.4, 6.2$  Hz, 1H), 5.16-5.12 (m, 1H), 3.87 (ddd,  $J = 8.6, 6.4, 6.2$  Hz, 1H), 3.81 (ddd,  $J = 8.0, 6.4, 6.2$  Hz, 1H), 2.42 (s, 3H).  **$^{13}\text{C-NMR}$**  (100 MHz,  $\text{CDCl}_3$ ):  $\delta$  143.7, 136.9, 135.9, 135.6, 132.2, 130.6, 130.3, 129.8, 129.7, 126.9, 126.8, 56.3, 46.1, 21.5 ppm. **ESI-MS**  $m/z$  (rel int): (pos) 360.0 ( $[\text{M}+\text{H}]^+$ , 100); (neg) 358.0 ( $[\text{M}-\text{H}]^-$ , 100). **HRMS** (ESI):  $[\text{M}+\text{H}]^+$  Calculated for:  $\text{C}_{15}\text{H}_{16}\text{Cl}_2\text{NO}_3\text{S}^+$ : 360.02225, found: 360.02244. Absolute difference (ppm): 0.53.

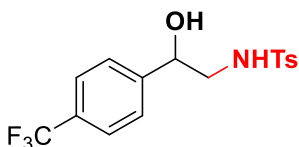

**N-(2-hydroxy-2-(4-(trifluoromethyl)phenyl)ethyl)-4-methylbenzenesulfonamide (3y):** Alkene **2y** (0.1 mmol) reacted under the general method to produce aminoalcohol **3y** as a white solid (31 mg, 0.086 mmol, 86%). **TLC:**  $R_f$ : 0.44 (2:1 heptanes/EtOAc). **IR** (thin film):  $\nu$  3850, 3250, 2985, 1744, 1555, 1322, 1126, 970  $\text{cm}^{-1}$ .  **$^1\text{H-NMR}$**  (400 MHz,  $\text{CDCl}_3$ ):  $\delta$  7.70 (d,  $J = 8.4$  Hz, 2H), 7.58 (d,  $J = 8.4$  Hz, 2H), 7.43 (d,  $J = 8.2$  Hz, 2H), 7.30 (d,  $J = 8.2$  Hz, 2H), 5.08 (t,  $J = 5.3$  Hz, 1H), 4.95 (t,  $J = 6.8$  Hz, 1H), 3.47-3.41 (m, 2H), 2.42 (s, 3H).  **$^{13}\text{C-NMR}$**  (100 MHz,  $\text{CDCl}_3$ ):  $\delta$  144.1, 141.8, 136.7, 130.4 (q,  $J = 32$  Hz), 129.8, 129.7, 127.8, 127.0, 125.8 (q,  $J = 4$  Hz), 125.0 (q,  $J = 273$  Hz), 60.6, 50.3, 21.5 ppm. **ESI-MS**  $m/z$  (rel int): (pos) 360.1 ( $[\text{M}+\text{H}]^+$ , 100); (neg) 358.1 ( $[\text{M}-\text{H}]^-$ , 100). **HRMS** (ESI):  $[\text{M}+\text{H}]^+$  Calculated for:  $\text{C}_{16}\text{H}_{17}\text{F}_3\text{NO}_3\text{S}^+$ : 360.08758, found: 360.08824. Absolute difference (ppm): 1.83.

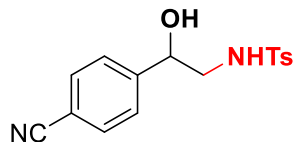

**N-(2-(4-cyanophenyl)-2-hydroxyethyl)-4-methylbenzenesulfonamide (3z):** Alkene **2z** (0.1 mmol) reacted under the general method to produce aminoalcohol **3z** as a white solid (25 mg, 0.080 mmol, 80%). **TLC:**  $R_f$ : 0.46 (2:1 heptanes/EtOAc). **IR** (thin film):  $\nu$  3850, 3232, 2950, 2240, 1753, 1322, 1124, 970  $\text{cm}^{-1}$ .  **$^1\text{H-NMR}$**  (400 MHz,  $\text{CDCl}_3$ ):  $\delta$  7.64 (d,  $J = 8.0$  Hz, 2H), 7.53 (d,  $J = 8.0$  Hz, 2H), 7.36 (d,  $J = 8.0$  Hz, 2H), 7.23 (d,  $J = 8.0$  Hz, 2H), 5.26 (t,  $J = 4.6$  Hz, 1H), 4.84 (dd,  $J = 6.8, 6.2$  Hz, 1H), 3.20-3.14 (m, 2H), 2.93 (dd,  $J = 6.8, 4.6$  Hz, 1H), 2.36 (s, 3H).  **$^{13}\text{C-NMR}$**  (100 MHz,  $\text{CDCl}_3$ ):  $\delta$  146.1, 144.1, 136.3, 132.4, 129.9, 127.0, 126.7, 118.6, 111.8, 72.2, 50.0, 21.6 ppm. **ESI-MS**  $m/z$  (rel int): (pos) 317.1 ( $[\text{M}+\text{H}]^+$ , 100); (neg) 315.1 ( $[\text{M}-\text{H}]^-$ , 100). **HRMS** (ESI):  $[\text{M}+\text{H}]^+$  Calculated for:  $\text{C}_{16}\text{H}_{17}\text{N}_2\text{O}_3\text{S}^+$ : 317.09544, found: 317.09553. Absolute difference (ppm): 0.28.

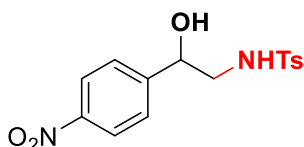

**N-(2-hydroxy-2-(4-nitrophenyl)ethyl)-4-methylbenzenesulfonamide (3aa):** Alkene **2aa** (0.1 mmol) reacted under the general method to produce aminoalcohol **3aa** as a white solid (28 mg, 0.082 mmol, 82%). **TLC:**  $R_f$ : 0.48 (2:1 heptanes/EtOAc). **IR** (thin film):  $\nu$  3850, 3221, 2985, 1753, 1555, 1322, 1142, 970  $\text{cm}^{-1}$ .  **$^1\text{H-NMR}$**  (400 MHz,  $\text{CDCl}_3$ ):  $\delta$  8.15 (d,  $J = 8.2$  Hz, 2H), 7.68 (d,  $J = 8.2$  Hz, 2H), 7.46 (d,  $J = 8.2$  Hz, 2H), 7.27 (d,  $J = 8.2$  Hz, 2H), 4.99 (bs, 1H), 4.96 (dd,  $J = 6.4, 6.2$  Hz, 1H), 3.28 (dd,  $J = 6.2, 5.8$  Hz, 1H), 2.99 (dd,  $J = 6.4, 5.3$  Hz, 1H), 2.39 (s, 3H).  **$^{13}\text{C-NMR}$**  (100 MHz,  $\text{CDCl}_3$ ):  $\delta$  147.9, 147.7, 144.1, 136.4, 129.9, 127.1, 126.8, 123.8, 72.1, 50.0, 21.6 ppm. **ESI-MS**  $m/z$  (rel int): (pos) 337.1 ( $[\text{M}+\text{H}]^+$ , 100); (neg) 335.1 ( $[\text{M}-\text{H}]^-$ , 100). **HRMS** (ESI):  $[\text{M}+\text{H}]^+$  Calculated for:  $\text{C}_{15}\text{H}_{17}\text{N}_2\text{O}_5\text{S}^+$ : 337.08527, found: 337.08566. Absolute difference (ppm): 1.16.

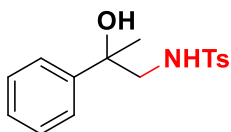

**N-(2-hydroxy-2-phenylpropyl)-4-methylbenzenesulfonamide (3ab):** Alkene **2ab** (0.1 mmol) reacted under the general method to produce aminoalcohol **3ab** as a white solid (28 mg, 0.091 mmol, 91%). **TLC:**  $R_f$ : 0.51 (2:1 heptanes/EtOAc). **IR** (thin film):  $\nu$  3850, 3232, 2983, 1748, 1551, 1340, 1133, 961  $\text{cm}^{-1}$ .  **$^1\text{H-NMR}$**  (400 MHz,  $\text{CDCl}_3$ ):  $\delta$  7.58 (d,  $J = 8.0$  Hz, 2H), 7.28-7.26 (m, 2H), 7.23-7.21 (m, 2H), 7.18-7.16 (m, 3H), 5.03 (t,  $J = 6.4$  Hz, 1H), 3.10 (dd,  $J = 6.4, 6.2$  Hz, 1H), 3.01 (dd,  $J = 6.8, 6.2$  Hz, 1H), 2.54 (bs, 1H), 2.33 (s, 3H), 1.45 (s, 3H).  **$^{13}\text{C-NMR}$**  (100 MHz,  $\text{CDCl}_3$ ):  $\delta$  144.9, 143.6, 136.5, 129.8, 128.5, 127.4, 127.1, 124.9, 73.7, 53.8, 27.4, 21.6 ppm. **ESI-MS**  $m/z$  (rel int): (pos) 306.1 ( $[\text{M}+\text{H}]^+$ , 100); (neg) 304.1 ( $[\text{M}-\text{H}]^-$ , 100). **HRMS** (ESI):  $[\text{M}+\text{H}]^+$  Calculated for:  $\text{C}_{16}\text{H}_{20}\text{NO}_3\text{S}^+$ : 306.11584, found: 306.11566. Absolute difference (ppm): 0.59.

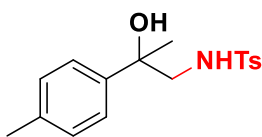

**N-(2-hydroxy-2-(p-tolyl)propyl)-4-methylbenzenesulfonamide (3ac):** Alkene **2ac** (0.1 mmol) reacted under the general method to produce aminoalcohol **3ac** as an oil (28 mg, 0.088 mmol, 88%). **TLC:**  $R_f$ : 0.53 (2:1 heptanes/EtOAc). **IR** (thin film):  $\nu$  3841, 3252, 2992, 1753, 1551, 1348, 1137, 970  $\text{cm}^{-1}$ .  **$^1\text{H-NMR}$**  (400 MHz,  $\text{CDCl}_3$ ):  $\delta$  7.69 (d,  $J = 8.0$  Hz, 2H), 7.27 (d,  $J = 8.2$  Hz, 4H), 7.14 (d,  $J = 8.0$  Hz, 2H), 4.91 (dd,  $J = 6.4, 4.8$  Hz, 1H), 3.23 (dd,  $J = 8.2, 6.4$  Hz, 1H), 3.10 (dd,  $J = 8.2, 4.8$  Hz, 1H), 2.42 (s, 3H), 2.33 (s, 3H), 1.56 (s, 3H).  **$^{13}\text{C-NMR}$**  (100 MHz,  $\text{CDCl}_3$ ):  $\delta$  143.5, 141.6, 137.1, 136.6, 129.8, 129.1, 127.1, 124.9, 73.6, 53.9, 27.5, 21.5, 20.9 ppm. **ESI-MS**  $m/z$  (rel int): (pos) 320.1 ( $[\text{M}+\text{H}]^+$ , 100); (neg) 318.1 ( $[\text{M}-\text{H}]^-$ , 100). **HRMS** (ESI):  $[\text{M}+\text{H}]^+$  Calculated for:  $\text{C}_{17}\text{H}_{22}\text{NO}_3\text{S}^+$ : 320.13149, found: 320.13117. Absolute difference (ppm): 0.99.

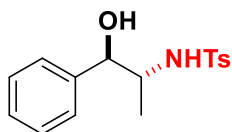

**N-((1R\*,2R\*)-1-hydroxy-1-phenyl-2-propyl)-4-methylbenzenesulfonamide (3ad):** Alkene **2ad** (0.1 mmol) reacted under the general method to produce aminoalcohol **3ad** as a white solid (26 mg, 0.084 mmol, 84%). **TLC:**  $R_f$ : 0.48 (2:1 heptanes/EtOAc). **IR** (thin film):  $\nu$  3850, 3252, 2987, 1740, 1555, 1340, 1142, 952  $\text{cm}^{-1}$ .  **$^1\text{H-NMR}$**  (400 MHz,  $\text{CDCl}_3$ ):  $\delta$  7.59 (d,  $J = 8.0$  Hz, 2H), 7.18-7.14 (m, 7H), 5.11 (d,  $J = 6.8$  Hz, 1H), 4.37 (d,  $J = 6.4$  Hz, 1H), 3.33 (dq,  $J = 6.4, 6.2$  Hz, 1H), 2.33 (s, 3H), 0.84 (d,  $J = 6.2$  Hz, 3H).  **$^{13}\text{C-NMR}$**  (100 MHz,  $\text{CDCl}_3$ ):  $\delta$  143.4, 140.4, 137.3, 129.7, 128.4, 128.1, 127.1, 126.8, 69.9, 55.7, 21.6, 12.9 ppm. **ESI-MS**  $m/z$  (rel int): (pos) 306.1 ( $[\text{M}+\text{H}]^+$ , 100); (neg) 304.1 ( $[\text{M}-\text{H}]^-$ , 100). **HRMS** (ESI):  $[\text{M}+\text{H}]^+$  Calculated for:  $\text{C}_{16}\text{H}_{20}\text{NO}_3\text{S}^+$ : 306.11584, found: 306.11564. Absolute difference (ppm): 0.22.

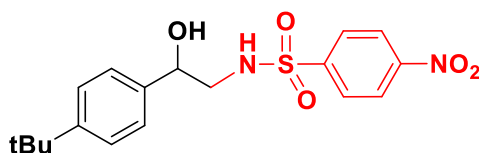

**N-(2-(4-(tert-butyl)phenyl)-2-hydroxyethyl)-4-nitrobenzenesulfonamide (3ae):** Alkene **2n** (0.1 mmol) reacted under the general method to produce aminoalcohol **3ae** as a white solid (35 mg, 0.093 mmol, 93%). **TLC:**  $R_f$ : 0.35 (2:1 heptanes/EtOAc). **IR** (thin film):  $\nu$  3807, 3203, 2992, 1757, 1553, 1362, 1106, 977  $\text{cm}^{-1}$ .  **$^1\text{H-NMR}$**  (400 MHz,  $\text{CDCl}_3$ ):  $\delta$  8.11 (d,  $J = 8.0$  Hz, 2H), 7.78 (d,  $J = 8.0$  Hz, 2H), 7.16 (d,  $J = 8.0$  Hz, 2H), 6.97 (d,  $J = 8.0$  Hz, 2H), 5.56 (d,  $J = 4.4$  Hz, 1H), 4.72 (dt,  $J = 6.2, 4.4$  Hz, 1H), 3.78 (dd,  $J = 11.6, 6.2$  Hz, 1H), 3.68 (dd,  $J = 11.6, 6.2$  Hz, 2H), 1.25 (s, 9H).  **$^{13}\text{C-NMR}$**  (100 MHz,  $\text{CDCl}_3$ ):  $\delta$  152.2, 149.8, 145.9, 133.1, 132.9, 128.5, 128.3, 126.9, 126.8, 126.7, 125.6, 125.5, 123.8, 58.6, 47.9, 34.5, 21.2 ppm. **ESI-MS**  $m/z$  (rel int): (pos) 379.1 ( $[\text{M}+\text{H}]^+$ , 100); (neg) 377.1 ( $[\text{M}-\text{H}]^-$ , 100). **HRMS** (ESI):  $[\text{M}+\text{H}]^+$  Calculated for:  $\text{C}_{18}\text{H}_{23}\text{N}_2\text{O}_5\text{S}^+$ : 379.13222, found: 379.13253. Absolute difference (ppm): 0.82.

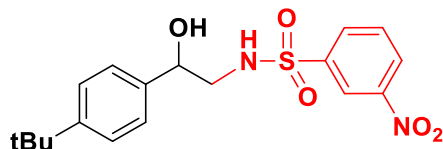

**N-(2-(4-(tert-butyl)phenyl)-2-hydroxyethyl)-3-nitrobenzenesulfonamide (3af):** Alkene **2n** (0.1 mmol) reacted under the general method to produce aminoalcohol **3af** as a white solid (33 mg, 0.089 mmol, 89%). **TLC:**  $R_f$ : 0.35 (2:1 heptanes/EtOAc). **IR** (thin film):  $\nu$  3843, 3225, 2983, 1759, 1559, 1324, 1148, 975  $\text{cm}^{-1}$ .  **$^1\text{H-NMR}$**  (400 MHz,  $\text{CDCl}_3$ ):  $\delta$  8.39 (t,  $J = 2.2$  Hz, 1H), 8.24 (dd,  $J = 7.3, 2.2$  Hz, 1H), 7.96 (dd,  $J = 7.3, 2.2$  Hz, 1H), 7.52 (t,  $J = 8.2$  Hz, 1H), 7.16 (d,  $J = 8.0$  Hz, 2H), 6.97 (d,  $J = 8.0$  Hz, 2H), 5.30 (d,  $J = 4.8$  Hz, 1H), 4.75 (dt,  $J = 6.4, 4.8$  Hz, 1H), 3.81 (dd,  $J = 11.2, 6.4$  Hz, 1H), 3.70 (dd,  $J = 11.2, 6.4$  Hz, 2H), 1.25 (s, 9H).  **$^{13}\text{C-NMR}$**  (100 MHz,  $\text{CDCl}_3$ ):  $\delta$  151.9, 142.4, 132.9, 132.6, 132.5, 130.0, 129.9, 126.9, 126.8, 126.7, 125.7, 125.6, 122.7, 58.6, 48.0, 34.5, 31.1 ppm. **ESI-MS**  $m/z$  (rel int): (pos) 379.1 ( $[\text{M}+\text{H}]^+$ , 100); (neg) 377.1 ( $[\text{M}-\text{H}]^-$ , 100). **HRMS** (ESI):  $[\text{M}+\text{H}]^+$  Calculated for:  $\text{C}_{18}\text{H}_{23}\text{N}_2\text{O}_5\text{S}^+$ : 379.13222, found: 379.13264. Absolute difference (ppm): 1.11.

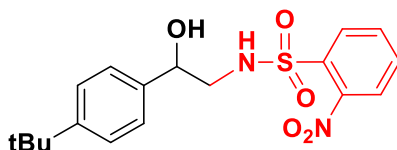

**N-(2-(4-(tert-butyl)phenyl)-2-hydroxyethyl)-2-nitrobenzenesulfonamide (3ag):** Alkene **2n** (0.1 mmol) reacted under the general method to produce aminoalcohol **3ag** as a white solid (32 mg, 0.084 mmol, 84%). **TLC:**  $R_f$ : 0.35 (2:1 heptanes/EtOAc). **IR** (thin film):  $\nu$  3881, 3252, 2934, 1755, 1557, 1328, 1124, 970  $\text{cm}^{-1}$ .  **$^1\text{H-NMR}$**  (400 MHz,  $\text{CDCl}_3$ ):  $\delta$  7.78 (d,  $J = 6.4$  Hz, 1H), 7.72 (d,  $J = 5.4$  Hz, 1H), 7.56 (t,  $J = 7.1$  Hz, 1H), 7.43 (t,  $J = 7.1$  Hz, 1H), 7.16 (d,  $J = 8.0$  Hz, 2H), 7.03 (d,  $J = 8.0$  Hz, 2H), 6.20 (d,  $J = 4.8$  Hz, 1H), 4.82 (dt,  $J = 6.4, 4.8$  Hz, 1H), 3.83 (dd,  $J = 10.7, 6.4$  Hz, 1H), 3.76 (dd,  $J = 10.7, 6.4$  Hz, 2H), 1.23 (s, 9H).  **$^{13}\text{C-NMR}$**  (100 MHz,  $\text{CDCl}_3$ ):  $\delta$  151.6, 147.4, 134.3, 133.7, 133.1, 132.5, 132.4, 130.8, 126.6, 126.5, 125.5, 125.1, 125.0, 59.3, 48.0, 34.5, 31.2 ppm. **ESI-MS**  $m/z$  (rel int): (pos) 379.1 ( $[\text{M}+\text{H}]^+$ , 100); (neg) 377.1 ( $[\text{M}-\text{H}]^-$ , 100). **HRMS** (ESI):  $[\text{M}+\text{H}]^+$  Calculated for:  $\text{C}_{18}\text{H}_{23}\text{N}_2\text{O}_5\text{S}^+$ : 379.13222, found: 379.13288. Absolute difference (ppm): 1.74.

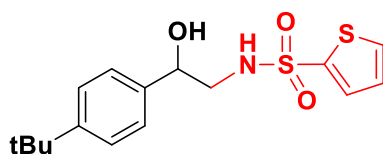

**N-(2-(4-(tert-butyl)phenyl)-2-hydroxyethyl)thiophene-2-sulfonamide (3ah):** Alkene **2n** (0.1 mmol) reacted under the general method to produce aminoalcohol **3ah** as a clear liquid (28 mg, 0.082 mmol, 82%). **TLC:**  $R_f$ : 0.64 (2:1 heptanes/EtOAc). **IR** (thin film):  $\nu$  3821, 3289, 2992, 1748, 1508, 1308, 1164, 943  $\text{cm}^{-1}$ .  **$^1\text{H-NMR}$**  (400 MHz,  $\text{CDCl}_3$ ):  $\delta$  7.49 (d,  $J = 7.1$  Hz, 1H), 7.43 (dd,  $J = 7.1, 3.5$  Hz, 1H), 7.27 (d,  $J = 8.0$  Hz, 2H), 7.09 (d,  $J = 8.0$  Hz, 2H), 6.93 (d,  $J = 7.1$  Hz,

1H), 5.40 (bs, 1H), 4.66 (dt,  $J = 6.2, 4.2$  Hz, 1H), 3.78 (d,  $J = 6.2$  Hz, 2H), 1.27 (s, 9H).  $^{13}\text{C-NMR}$  (100 MHz,  $\text{CDCl}_3$ ):  $\delta$  151.5, 140.9, 133.9, 132.7, 132.2, 127.2, 126.5, 125.7, 125.6, 58.5, 47.7, 34.6, 31.2 ppm. **ESI-MS**  $m/z$  (rel int): (pos) 340.1 ( $[\text{M}+\text{H}]^+$ , 100); (neg) 338.1 ( $[\text{M}-\text{H}]^-$ , 100). **HRMS** (ESI):  $[\text{M}+\text{H}]^+$  Calculated for:  $\text{C}_{16}\text{H}_{22}\text{NO}_3\text{S}_2^+$ : 340.10356, found: 340.10316. Absolute difference (ppm): 1.18.

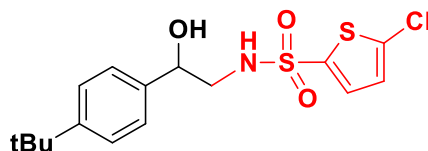

**N-(2-(4-(tert-butyl)phenyl)-2-hydroxyethyl)-5-chlorothiophene-2-sulfonamide (3ai)**: Alkene **2n** (0.1 mmol) reacted under the general method to produce aminoalcohol **3ai** as a clear oil (32 mg, 0.086 mmol, 86%). **TLC**:  $R_f$ : 0.64 (2:1 heptanes/EtOAc). **IR** (thin film):  $\nu$  3838, 3253, 2998, 1753, 1502, 1304, 1124, 947  $\text{cm}^{-1}$ .  $^1\text{H-NMR}$  (400 MHz,  $\text{CDCl}_3$ ):  $\delta$  7.29 (d,  $J = 8.0$  Hz, 2H), 7.14 (d,  $J = 4.4$  Hz, 1H), 7.10 (d,  $J = 8.0$  Hz, 2H), 6.70 (d,  $J = 4.4$  Hz, 1H), 5.49 (d,  $J = 4.4$  Hz, 1H), 4.66 (dt,  $J = 6.2, 4.2$  Hz, 1H), 3.79-3.74 (m, 2H), 1.29 (s, 9H).  $^{13}\text{C-NMR}$  (100 MHz,  $\text{CDCl}_3$ ):  $\delta$  151.9, 138.9, 137.6, 133.5, 132.2, 132.1, 126.9, 126.8, 126.6, 126.4, 125.7, 125.5, 58.5, 47.9, 34.6, 31.2 ppm. **ESI-MS**  $m/z$  (rel int): (pos) 374.1 ( $[\text{M}+\text{H}]^+$ , 100); (neg) 372.1 ( $[\text{M}-\text{H}]^-$ , 100). **HRMS** (ESI):  $[\text{M}+\text{H}]^+$  Calculated for:  $\text{C}_{16}\text{H}_{21}\text{ClNO}_3\text{S}_2^+$ : 374.06459, found: 374.06435. Absolute difference (ppm): 0.64.

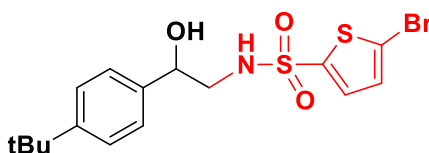

**5-bromo-N-(2-(4-(tert-butyl)phenyl)-2-hydroxyethyl)thiophene-2-sulfonamide (3aj)**: Alkene **2n** (0.1 mmol) reacted under the general method to produce aminoalcohol **3aj** as a thick clear oil (35 mg, 0.088 mmol, 88%). **TLC**:  $R_f$ : 0.64 (2:1 heptanes/EtOAc). **IR** (thin film):  $\nu$  3898, 3203, 2996, 1744, 1520, 1340, 1106, 941  $\text{cm}^{-1}$ .  $^1\text{H-NMR}$  (400 MHz,  $\text{CDCl}_3$ ):  $\delta$  7.29 (d,  $J = 8.0$  Hz, 2H), 7.12-7.09 (m, 3H), 6.82 (d,  $J = 3.5$  Hz, 1H), 5.63 (d,  $J = 2.8$  Hz, 1H), 4.66 (dt,  $J = 6.2, 2.8$  Hz, 1H), 3.79-3.74 (m, 2H), 1.29 (s, 9H).  $^{13}\text{C-NMR}$  (100 MHz,  $\text{CDCl}_3$ ):  $\delta$  151.7, 141.8, 133.6, 132.8, 130.0, 126.9, 126.6, 126.5, 125.7, 125.6, 120.1, 58.6, 47.8, 34.5, 31.2 ppm. **ESI-MS**  $m/z$  (rel int): (pos) 418.0 ( $[\text{M}+\text{H}]^+$ , 100); (neg) 416.0 ( $[\text{M}-\text{H}]^-$ , 100). **HRMS** (ESI):  $[\text{M}+\text{H}]^+$  Calculated for:  $\text{C}_{16}\text{H}_{21}\text{BrNO}_3\text{S}_2^+$ : 418.01407, found: 418.01448. Absolute difference (ppm): 0.98.

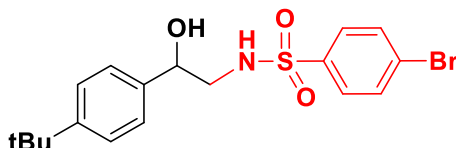

**4-bromo-N-(2-(4-(tert-butyl)phenyl)-2-hydroxyethyl)benzenesulfonamide (3ak):** Alkene **2n** (0.1 mmol) reacted under the general method to produce aminoalcohol **3ak** as a yellow oil (35 mg, 0.080 mmol, 80%). **TLC:**  $R_f$ : 0.42 (2:1 heptanes/EtOAc). **IR** (thin film):  $\nu$  3892, 3199, 2989, 1735, 1503, 1322, 1098, 934  $\text{cm}^{-1}$ .  **$^1\text{H-NMR}$**  (400 MHz,  $\text{CDCl}_3$ ):  $\delta$  7.59 (d,  $J$  = 8.0 Hz, 2H), 7.41 (d,  $J$  = 8.0 Hz, 2H), 7.16 (d,  $J$  = 8.0 Hz, 2H), 6.97 (d,  $J$  = 8.0 Hz, 2H), 5.61 (d,  $J$  = 3.5 Hz, 1H), 4.62 (dt,  $J$  = 6.2, 3.5 Hz, 1H), 3.73-3.69 (m, 2H), 1.27 (s, 9H).  **$^{13}\text{C-NMR}$**  (100 MHz,  $\text{CDCl}_3$ ):  $\delta$  151.7, 139.2, 133.5, 132.6, 132.0, 131.9, 128.7, 127.4, 126.9, 126.7, 126.6, 125.9, 125.6, 125.5, 58.5, 47.9, 34.5, 31.2 ppm. **ESI-MS**  $m/z$  (rel int): (pos) 412.1 ( $[\text{M}+\text{H}]^+$ , 100); (neg) 410.1 ( $[\text{M}-\text{H}]^-$ , 100). **HRMS** (ESI):  $[\text{M}+\text{H}]^+$  Calculated for:  $\text{C}_{18}\text{H}_{23}\text{BrNO}_3\text{S}^+$ : 412.05765, found: 412.05724. Absolute difference (ppm): 0.99.

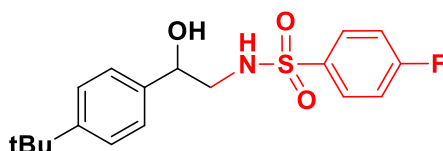

**N-(2-(4-(tert-butyl)phenyl)-2-hydroxyethyl)-4-fluorobenzenesulfonamide (3al):** Alkene **2n** (0.1 mmol) reacted under the general method to produce aminoalcohol **3al** as an oil (29 mg, 0.084 mmol, 84%). **TLC:**  $R_f$ : 0.42 (2:1 heptanes/EtOAc). **IR** (thin film):  $\nu$  3881, 3164, 2993, 1724, 1524, 1340, 1096, 950  $\text{cm}^{-1}$ .  **$^1\text{H-NMR}$**  (400 MHz,  $\text{CDCl}_3$ ):  $\delta$  7.66 (d,  $J$  = 8.2 Hz, 2H), 7.17 (d,  $J$  = 8.0 Hz, 2H), 6.99-6.93 (m, 4H), 5.62 (d,  $J$  = 4.0 Hz, 1H), 4.62 (dt,  $J$  = 6.2, 4.0 Hz, 1H), 3.73-3.70 (m, 2H), 1.25 (s, 9H).  **$^{13}\text{C-NMR}$**  (100 MHz,  $\text{CDCl}_3$ ):  $\delta$  165.1 (d,  $J$  = 250 Hz, 1C), 151.5, 136.2, 136.1, 129.8, 129.7, 125.6, 125.5, 116.0 (d,  $J$  = 77 Hz, 2C), 58.5, 47.9, 34.5, 31.2 ppm. **ESI-MS**  $m/z$  (rel int): (pos) 352.1 ( $[\text{M}+\text{H}]^+$ , 100); (neg) 350.1 ( $[\text{M}-\text{H}]^-$ , 100). **HRMS** (ESI):  $[\text{M}+\text{H}]^+$  Calculated for:  $\text{C}_{18}\text{H}_{23}\text{FNO}_3\text{S}^+$ : 352.13772, found: 352.13724. Absolute difference (ppm): 1.36.

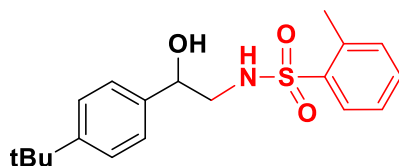

**N-(2-(4-(tert-butyl)phenyl)-2-hydroxyethyl)-2-methylbenzenesulfonamide (3am):** Alkene **2n** (0.1 mmol) reacted under the general method to produce aziridine **3am** as an oil (32 mg, 0.091 mmol, 91%). **TLC:**  $R_f$ : 0.62 (2:1 heptanes/EtOAc).<sup>6</sup> **IR** (thin film):  $\nu$  3825, 3155, 2995, 1722, 1528, 1324, 1106, 952  $\text{cm}^{-1}$ .  **$^1\text{H-NMR}$**  (400 MHz,  $\text{CDCl}_3$ ):  $\delta$  7.76 (d,  $J$  = 6.4 Hz, 1H), 7.72 (t,  $J$  = 5.3 Hz, 1H), 7.25 (t,  $J$  = 5.3 Hz, 1H), 7.19-7.14 (m, 3H), 6.98 (d,  $J$  = 8.0 Hz, 2H), 5.43 (d,  $J$  = 3.5 Hz, 1H), 4.53 (dt,  $J$  = 6.4, 3.5 Hz, 1H), 3.74-3.69 (m, 2H), 2.57 (s, 3H), 1.25 (s, 9H).  **$^{13}\text{C-NMR}$**  (100 MHz,  $\text{CDCl}_3$ ):  $\delta$  151.6, 147.4, 134.3, 133.7, 133.1, 132.5, 132.4, 130.8, 126.6, 126.5, 125.5, 125.1, 125.0, 59.3, 48.0, 34.5, 31.2 ppm. **ESI-MS**  $m/z$  (rel int): (pos) 348.2 ( $[\text{M}+\text{H}]^+$ , 100); (neg)



346.2 ( $[M-H]^-$ , 100). **HRMS** (ESI):  $[M+H]^+$  Calculated for:  $C_{19}H_{26}NO_3S^+$ : 348.16279, found: 348.16232. Absolute difference (ppm): 1.34.

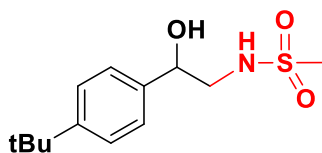

**N-(2-(4-(tert-butyl)phenyl)-2-hydroxyethyl)methanesulfonamide (3an)**: Alkene **2n** (0.1 mmol) reacted under the general method to produce aziridine **3an** as a yellow oil (22 mg, 0.084 mmol, 84%). **TLC**:  $R_f$ : 0.64 (2:1 heptanes/EtOAc).<sup>3</sup> **IR** (thin film):  $\nu$  3881, 3175, 2998, 1744, 1526, 1317, 1104, 950  $cm^{-1}$ .  **$^1H$ -NMR** (400 MHz,  $CDCl_3$ ):  $\delta$  7.42 (d,  $J$  = 8.0 Hz, 2H), 7.27 (d,  $J$  = 8.0 Hz, 2H), 5.25 (bs, 1H), 4.77 (dt,  $J$  = 4.8, 3.2 Hz, 1H), 3.87 (dd,  $J$  = 11.2, 4.8 Hz, 1H), 3.74 (dd,  $J$  = 11.2, 4.8 Hz, 1H), 2.79 (s, 3H), 1.32 (s, 9H).  **$^{13}C$ -NMR** (100 MHz,  $CDCl_3$ ):  $\delta$  151.9, 134.7, 126.6, 58.4, 48.4, 42.0, 34.6, 31.2 ppm. **ESI-MS**  $m/z$  (rel int): (pos) 272.1 ( $[M+H]^+$ , 100); (neg) 270.1 ( $[M-H]^-$ , 100). **HRMS** (ESI):  $[M+H]^+$  Calculated for:  $C_{13}H_{22}NO_3S^+$ : 272.13149, found: 272.13162. Absolute difference (ppm): 0.48.

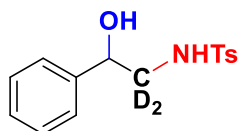

**N-(2-hydroxy-2-phenylethyl-1,1-d<sub>2</sub>)-4-methylbenzenesulfonamide (3j1-d<sub>2</sub>)**: Obtained through general procedure for competition experiments with deuterated-alkenes as a white solid. **TLC**:  $R_f$ : 0.48 (2:1 heptanes/EtOAc).  **$^1H$ -NMR** (400 MHz,  $CDCl_3$ ):  $\delta$  7.68 (d,  $J$  = 8.2 Hz, 2H), 7.29-7.19 (m, 7H), 5.12 (bs, 1H), 4.80 (d,  $J$  = 4.8 Hz, 1H), 2.33 (s, 3H).  **$^{13}C$ -NMR** (100 MHz,  $CDCl_3$ ):  $\delta$  143.4, 140.3, 136.6, 129.4, 128.5, 128.1, 127.2, 125.8, 72.3, 50.3, 21.5 ppm. **ESI-MS**  $m/z$  (rel int): (pos) 294.1 ( $[M+H]^+$ , 100); (neg) 292.1 ( $[M-H]^-$ , 100). **HRMS** (ESI):  $[M+H]^+$  Calculated for:  $C_{15}H_{16}D_2NO_3S^+$ : 294.11274, found: 294.11224. Absolute difference (ppm): 1.70.

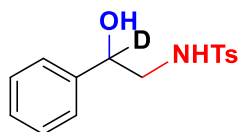

**N-(2-hydroxy-2-phenylethyl-2-d)-4-methylbenzenesulfonamide (3j2-d)**: Obtained through general procedure for competition experiments with deuterated-alkenes as a white solid. **TLC**:  $R_f$ : 0.48 (2:1 heptanes/EtOAc).  **$^1H$ -NMR** (400 MHz,  $CDCl_3$ ):  $\delta$  7.72 (d,  $J$  = 8.2 Hz, 2H), 7.29-7.23 (m, 7H), 5.01 (bs, 1H), 3.50 (dd,  $J$  = 6.4, 4.8 Hz, 1H), 3.32 (dd,  $J$  = 6.4, 4.8 Hz, 1H), 2.37 (s, 3H).  **$^{13}C$ -NMR** (100 MHz,  $CDCl_3$ ):  $\delta$  143.8, 140.7, 136.8, 129.8, 128.5, 128.1, 127.2, 125.4, 72.2, 50.3, 21.3 ppm. **ESI-MS**  $m/z$  (rel int): (pos) 293.1 ( $[M+H]^+$ , 100); (neg) 291.1 ( $[M-H]^-$ , 100). **HRMS** (ESI):  $[M+H]^+$  Calculated for:  $C_{15}H_{17}DNO_3S^+$ : 293.10647, found: 293.10693. Absolute difference (ppm): 1.57.

**References:**

1. Liebeskind, L. S.; Sharpless, K. B.; Wilson, R. D.; Ibers, J. A. The First d0 Metallooxaziridines. Amination of Olefins. *J. Am. Chem. Soc.* **1978**, *100*, 7061–7063.
  2. Wang, Z.; Cui, Y.-T.; Xu, Z.-B.; Qu, J. Hot Water Ring-opening of Epoxides and Aziridines by Water and Other Nucleophiles. *J. Org. Chem.* **2008**, *6*, 2270.
  3. Teng, Y.-Q.; Liu, Y.; Lu, X.-B. Simple Trivalent Cobalt Complex Mediated Copolymerization of Epoxides with Isocyanate: Combining High Activity and Selectivity. *Macromolecules*, **2022**, *20*, 9074.
  4. Ibuka, T.; Nakai, K.; Habashita, H.; Hotta, Y.; Otaka, A.; Tamamura, H.; Fujii, N. Aza-Payne Rearrangement of Activated 2-Aziridinemethanols and 2,3-Epoxy Amines under Basic Conditions. *J. Org. Chem.* **1995**, *60*, 2044.
  5. Sugimoto, H.; Mikami, A.; Kai, K.; Sajith, P. K.; Shiota, Y.; Yoshizawa, K.; Asano, K.; Suzuki, T.; Itoh, S. *cis*-1,2-Aminohydroxylation of Alkenes Involving a Catalytic Cycle of Osmium(III) and Osmium(V) Centers: Os<sup>V</sup>(O)(NHTs) Active Oxidant with a Macrocyclic Tetradentate Ligand *Inorg. Chem.* **2015**, *54*, 7073.
  6. Miyazawa, K.; Koike, T.; Akita, M. Regiospecific Intermolecular Aminohydroxylation of Olefins by Photoredox Catalysis *Chem. Eur. J.* **2015**, *21*, 11677.
  7. Li, X.; Bin, N.; Chang, H.-H.; Wei, W.-L. NaHSO<sub>3</sub>-Promoted Ring Opening of Aziridines and Epoxides with H<sub>2</sub>O. *Heterocycles*, **2014**, *4*, 1009.
  8. Fan, R.-H.; Hou, X.-L. Tetrabutylammonium bisulfate: a new effective catalyst for the hydrolysis of aziridines or epoxides *Org. Biomol. Chem.* **2003**, *1*, 1565.
  9. Lee, J.; Radomkit, S.; Torker, S.; del Pozo, J.; Hoveyda, A. H. Mechanism-based Enhancement of Scope and Enantioselectivity for Reactions Involving a Copper-Substituted Stereogenic Carbon Centre. *Nature Chemistry*, **2018**, *10*, 99-108.
-

**E.  $^1\text{H}$ -NMR AND  $^{13}\text{C}$ -NMR SPECTRA**

brd-74-7x.10

8.21  
8.11  
8.10  
8.08  
7.69  
7.68  
7.67  
7.66  
7.26  
7.24

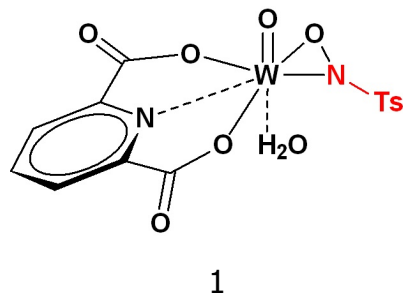

2.31

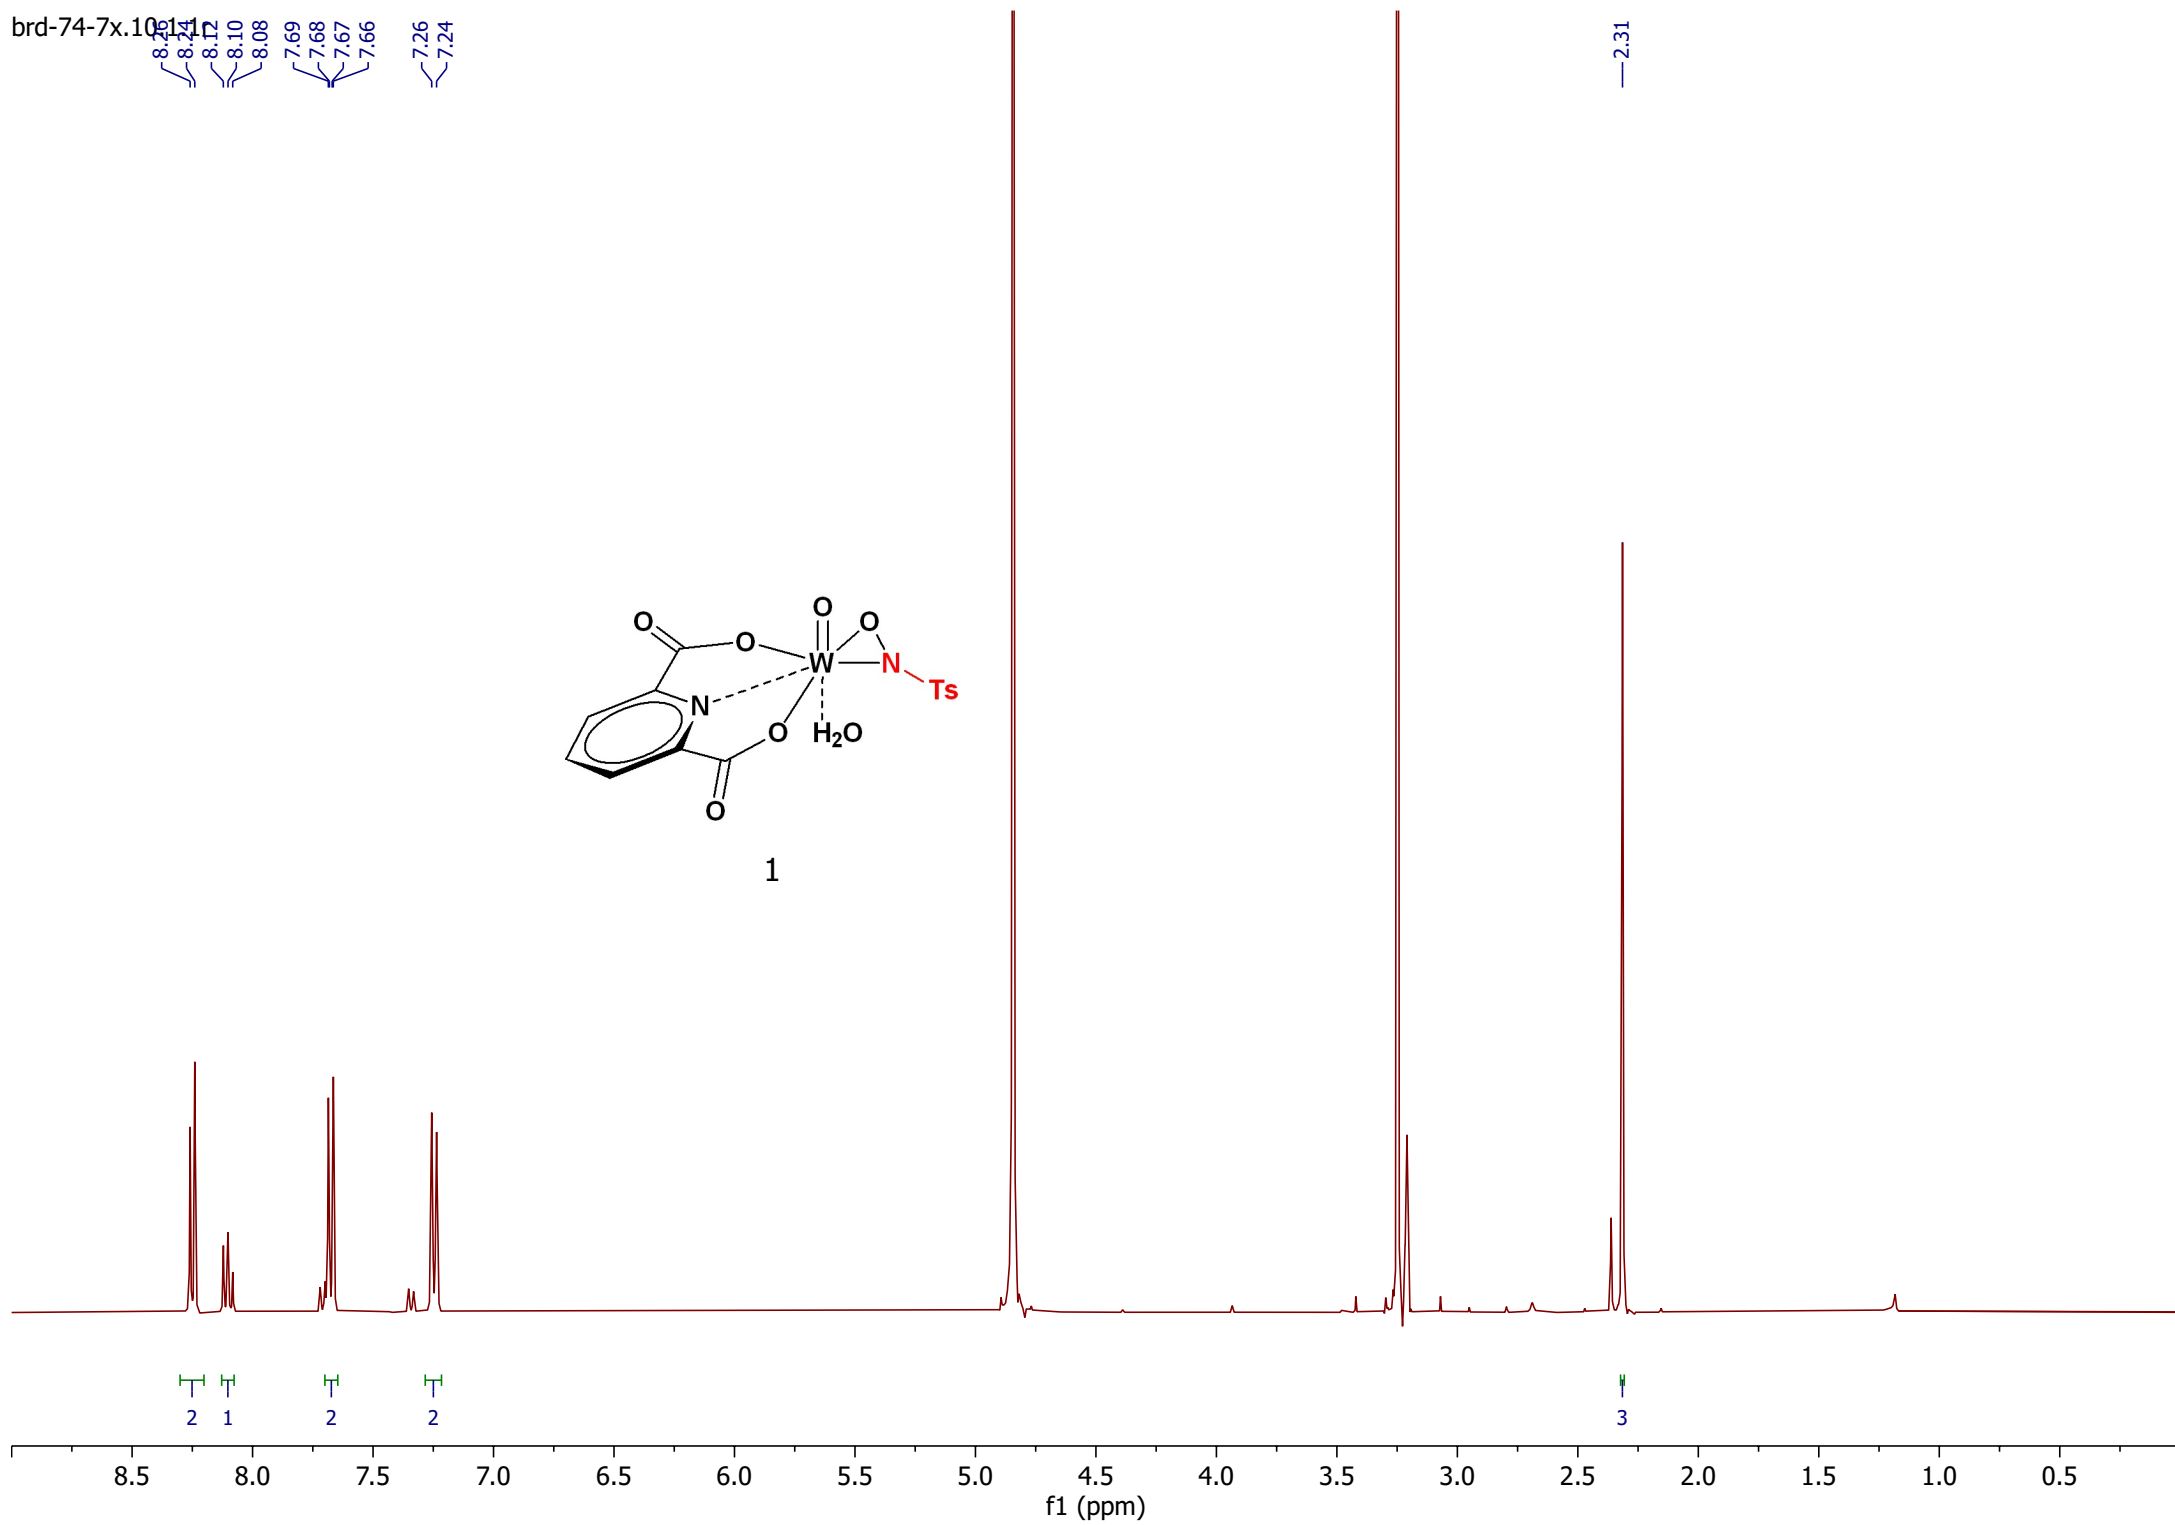

pdata/1

165.74  
164.86

148.22  
148.10  
147.44  
147.37  
139.54  
139.17  
138.86

127.82  
127.76  
127.65

48.31  
48.24  
48.10  
48.03  
47.88  
47.81  
47.67  
47.60  
47.39  
47.32  
47.18  
47.14  
46.96  
34.00

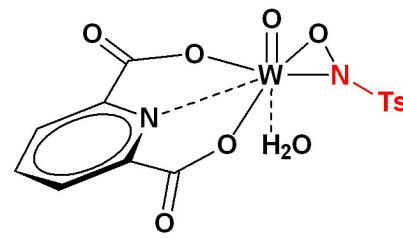

1

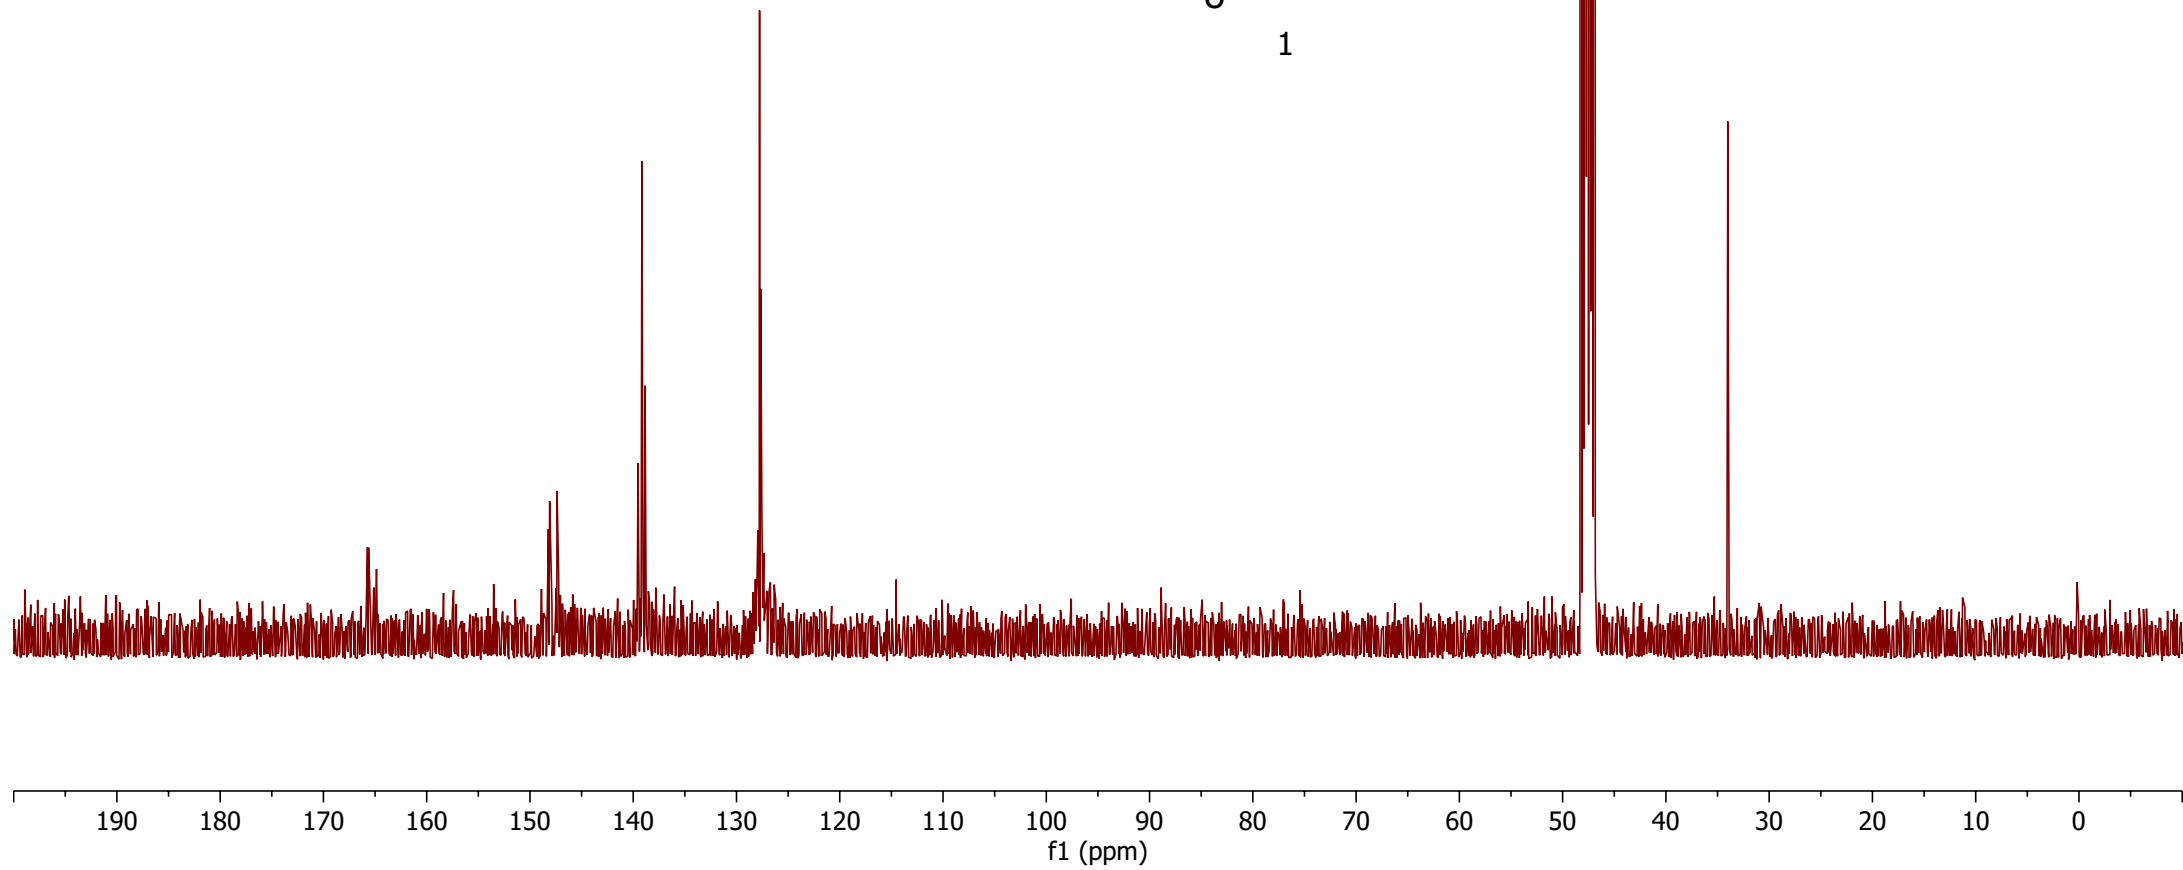

pdata/1

8.34  
8.32  
8.19  
8.17  
8.17  
8.15

7.22  
7.20  
7.06  
7.04  
6.75  
6.73

4.51  
4.50  
4.48  
3.78  
3.78  
3.77  
3.76  
3.76  
3.72  
3.70  
3.70  
3.68  
3.56  
2.34

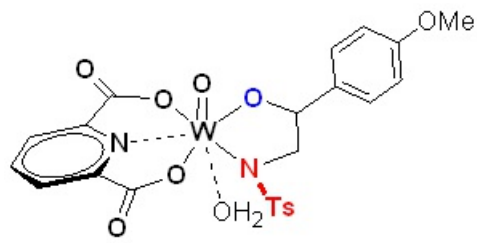

Intermediate A

2 1

2

2 2

2

1

3 2

4

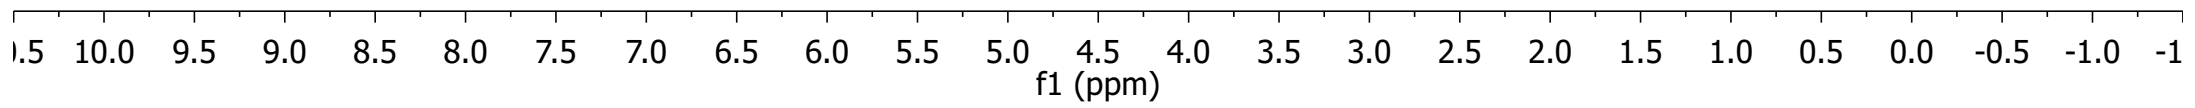

pdata/

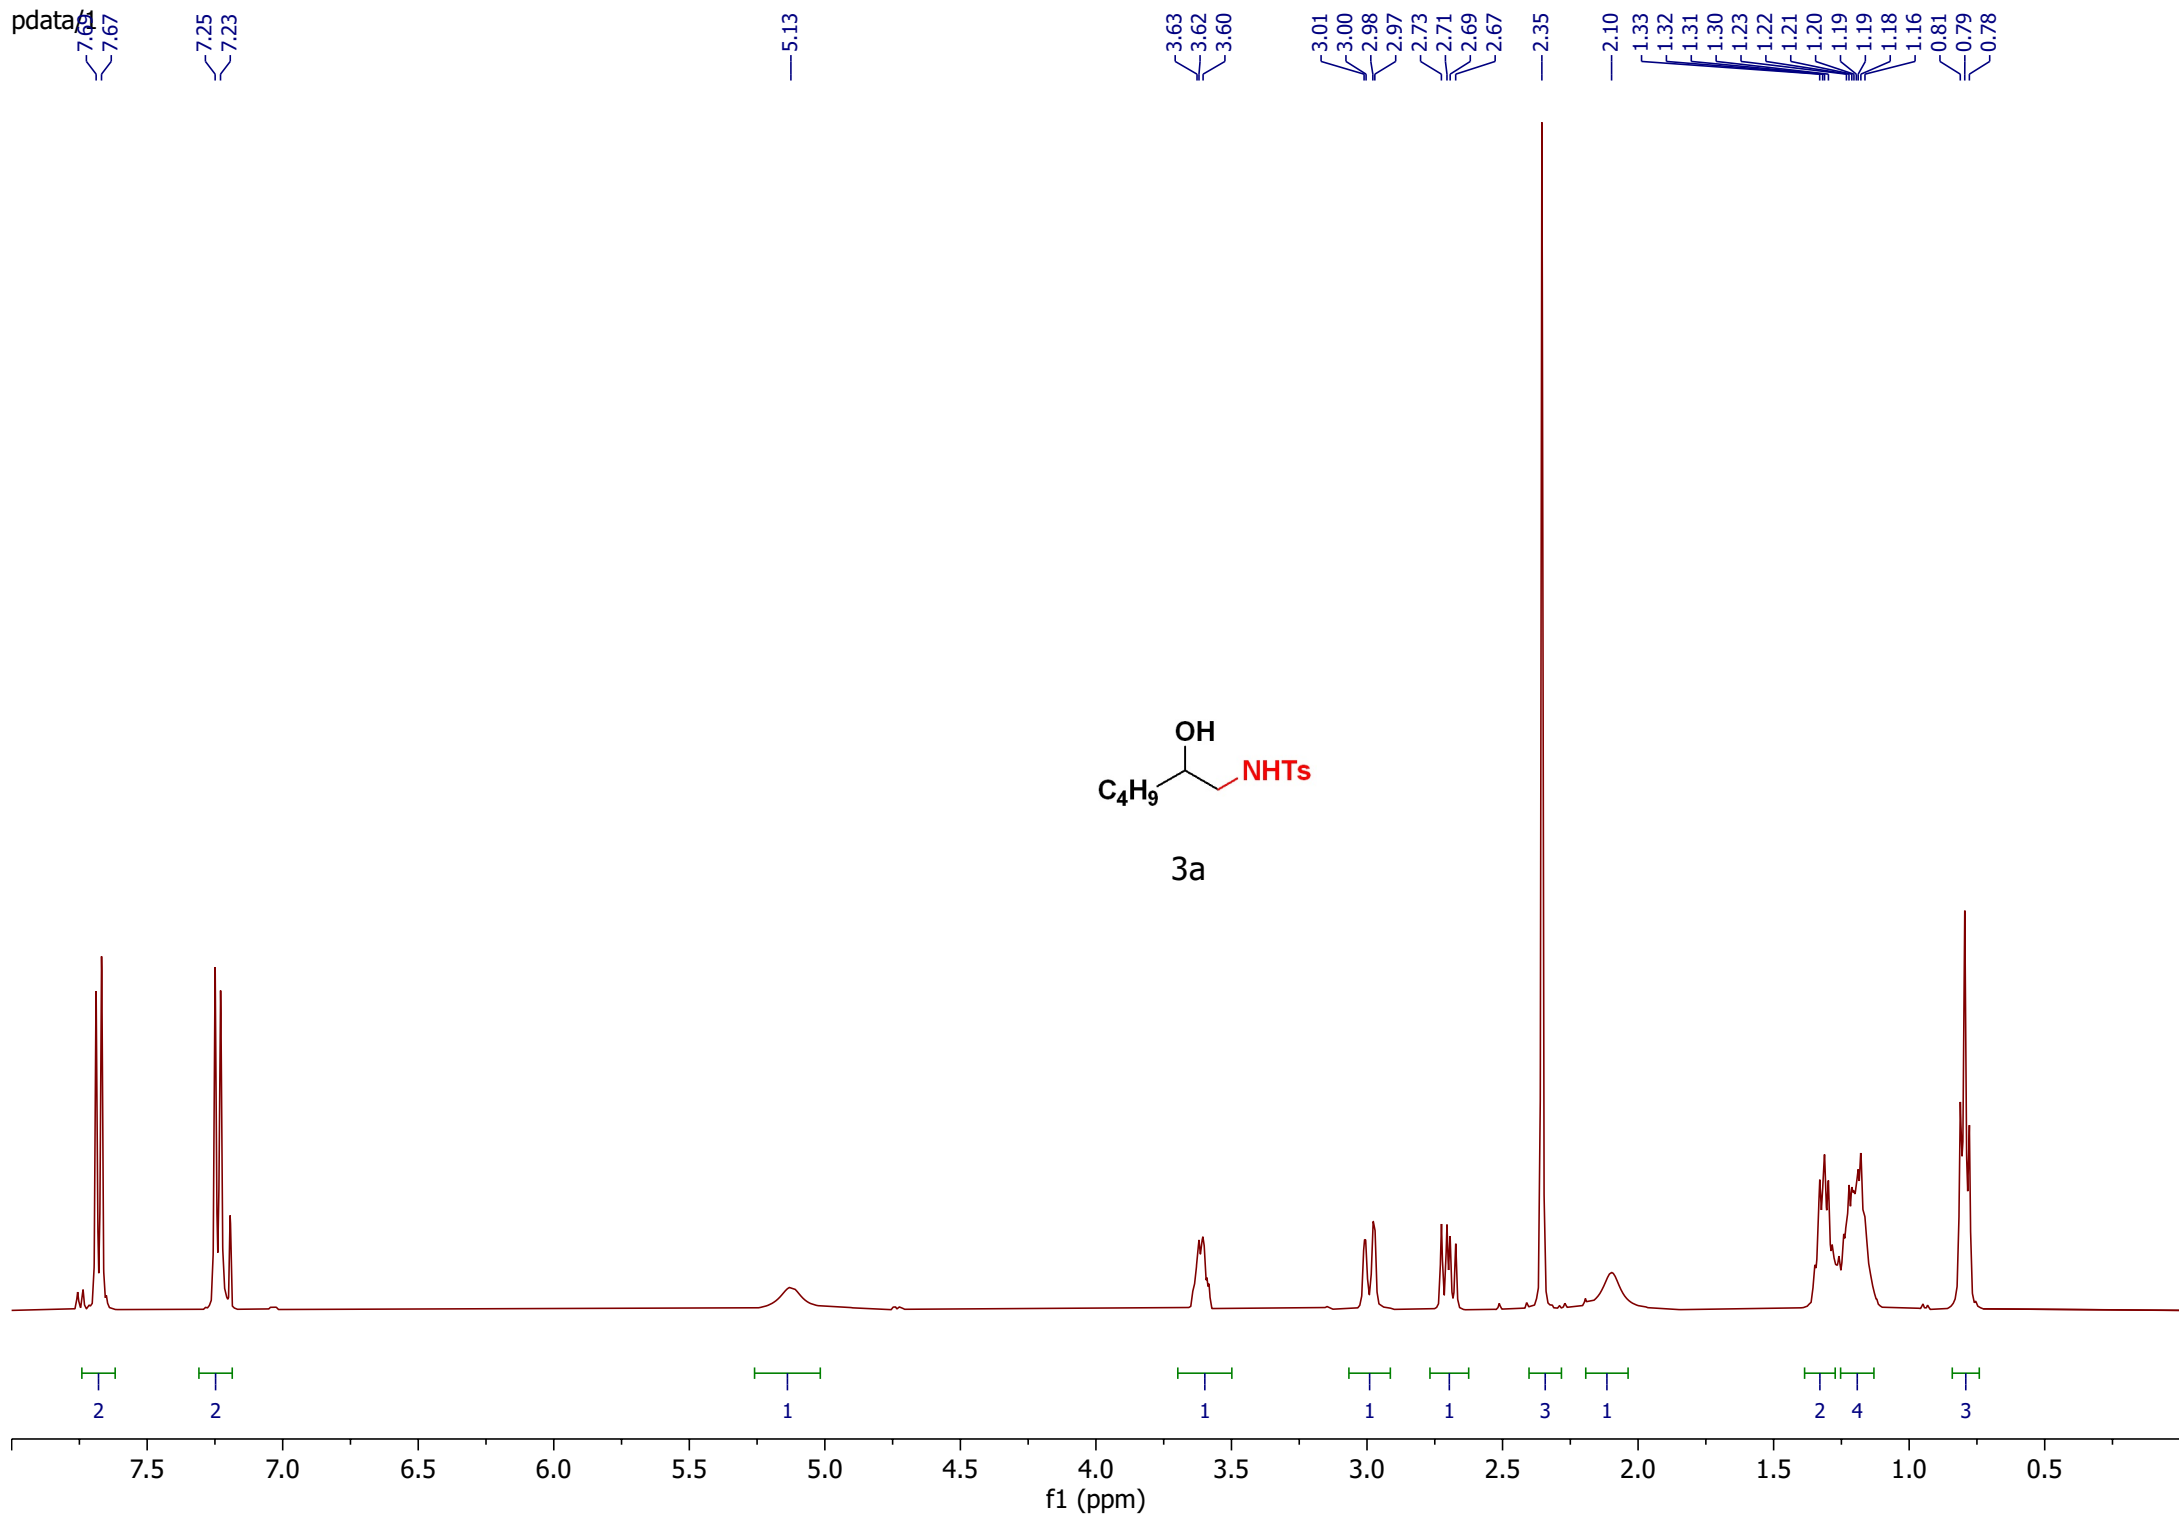

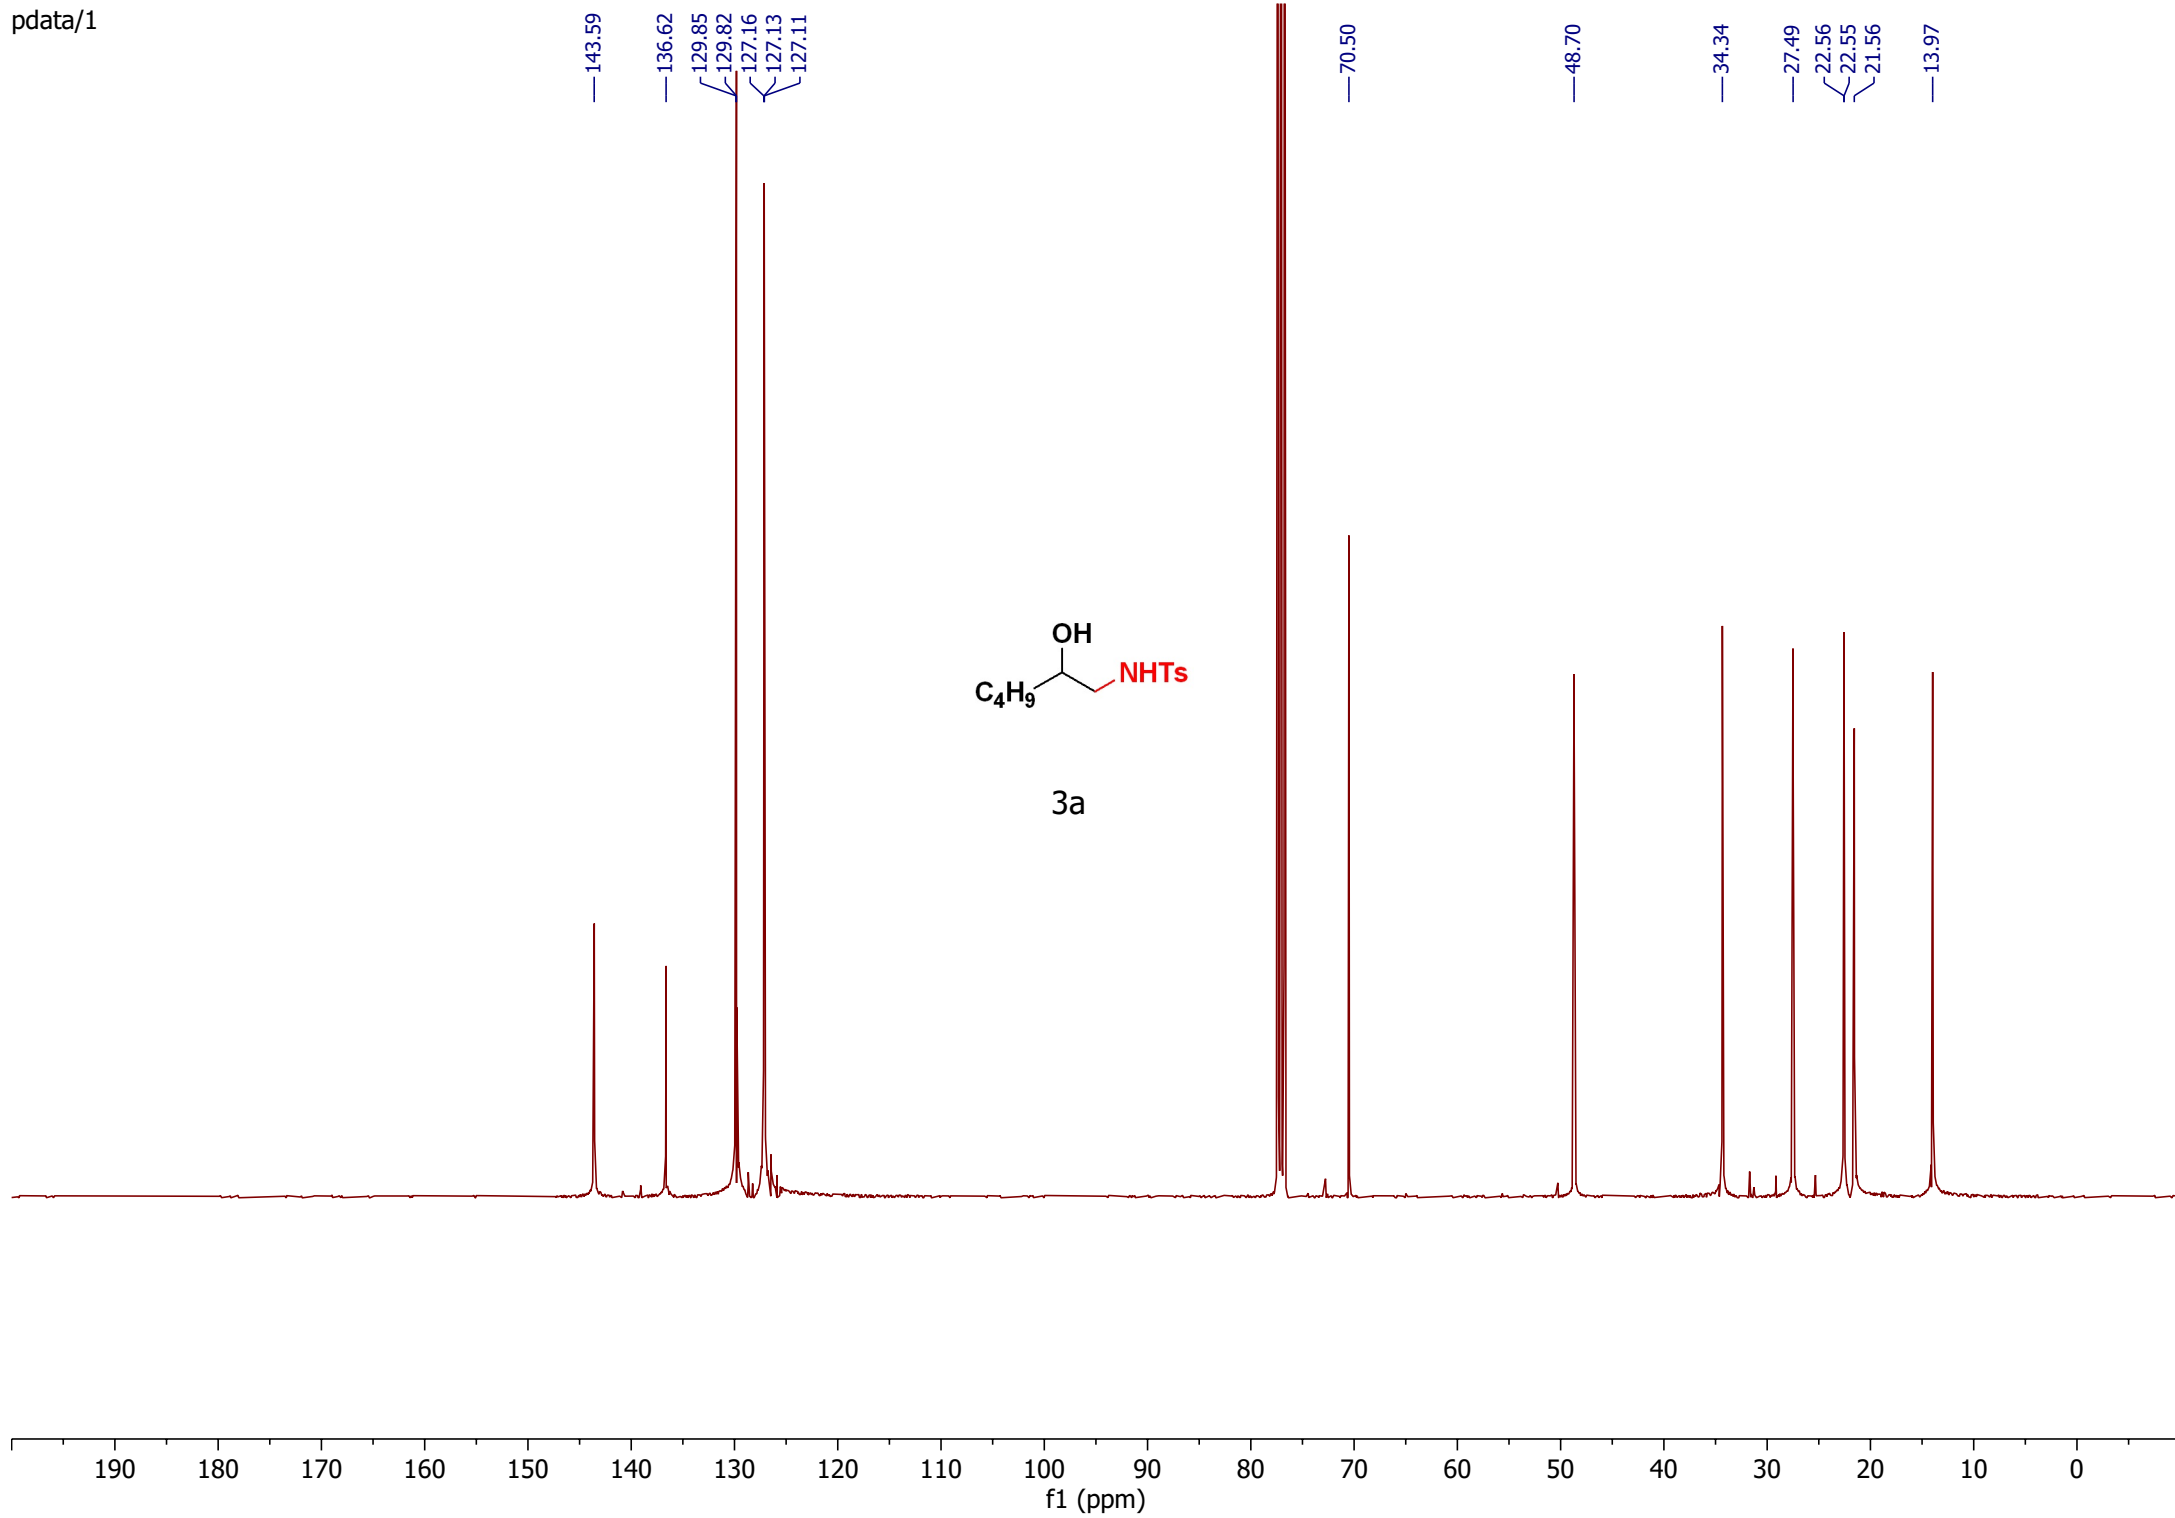



pdata

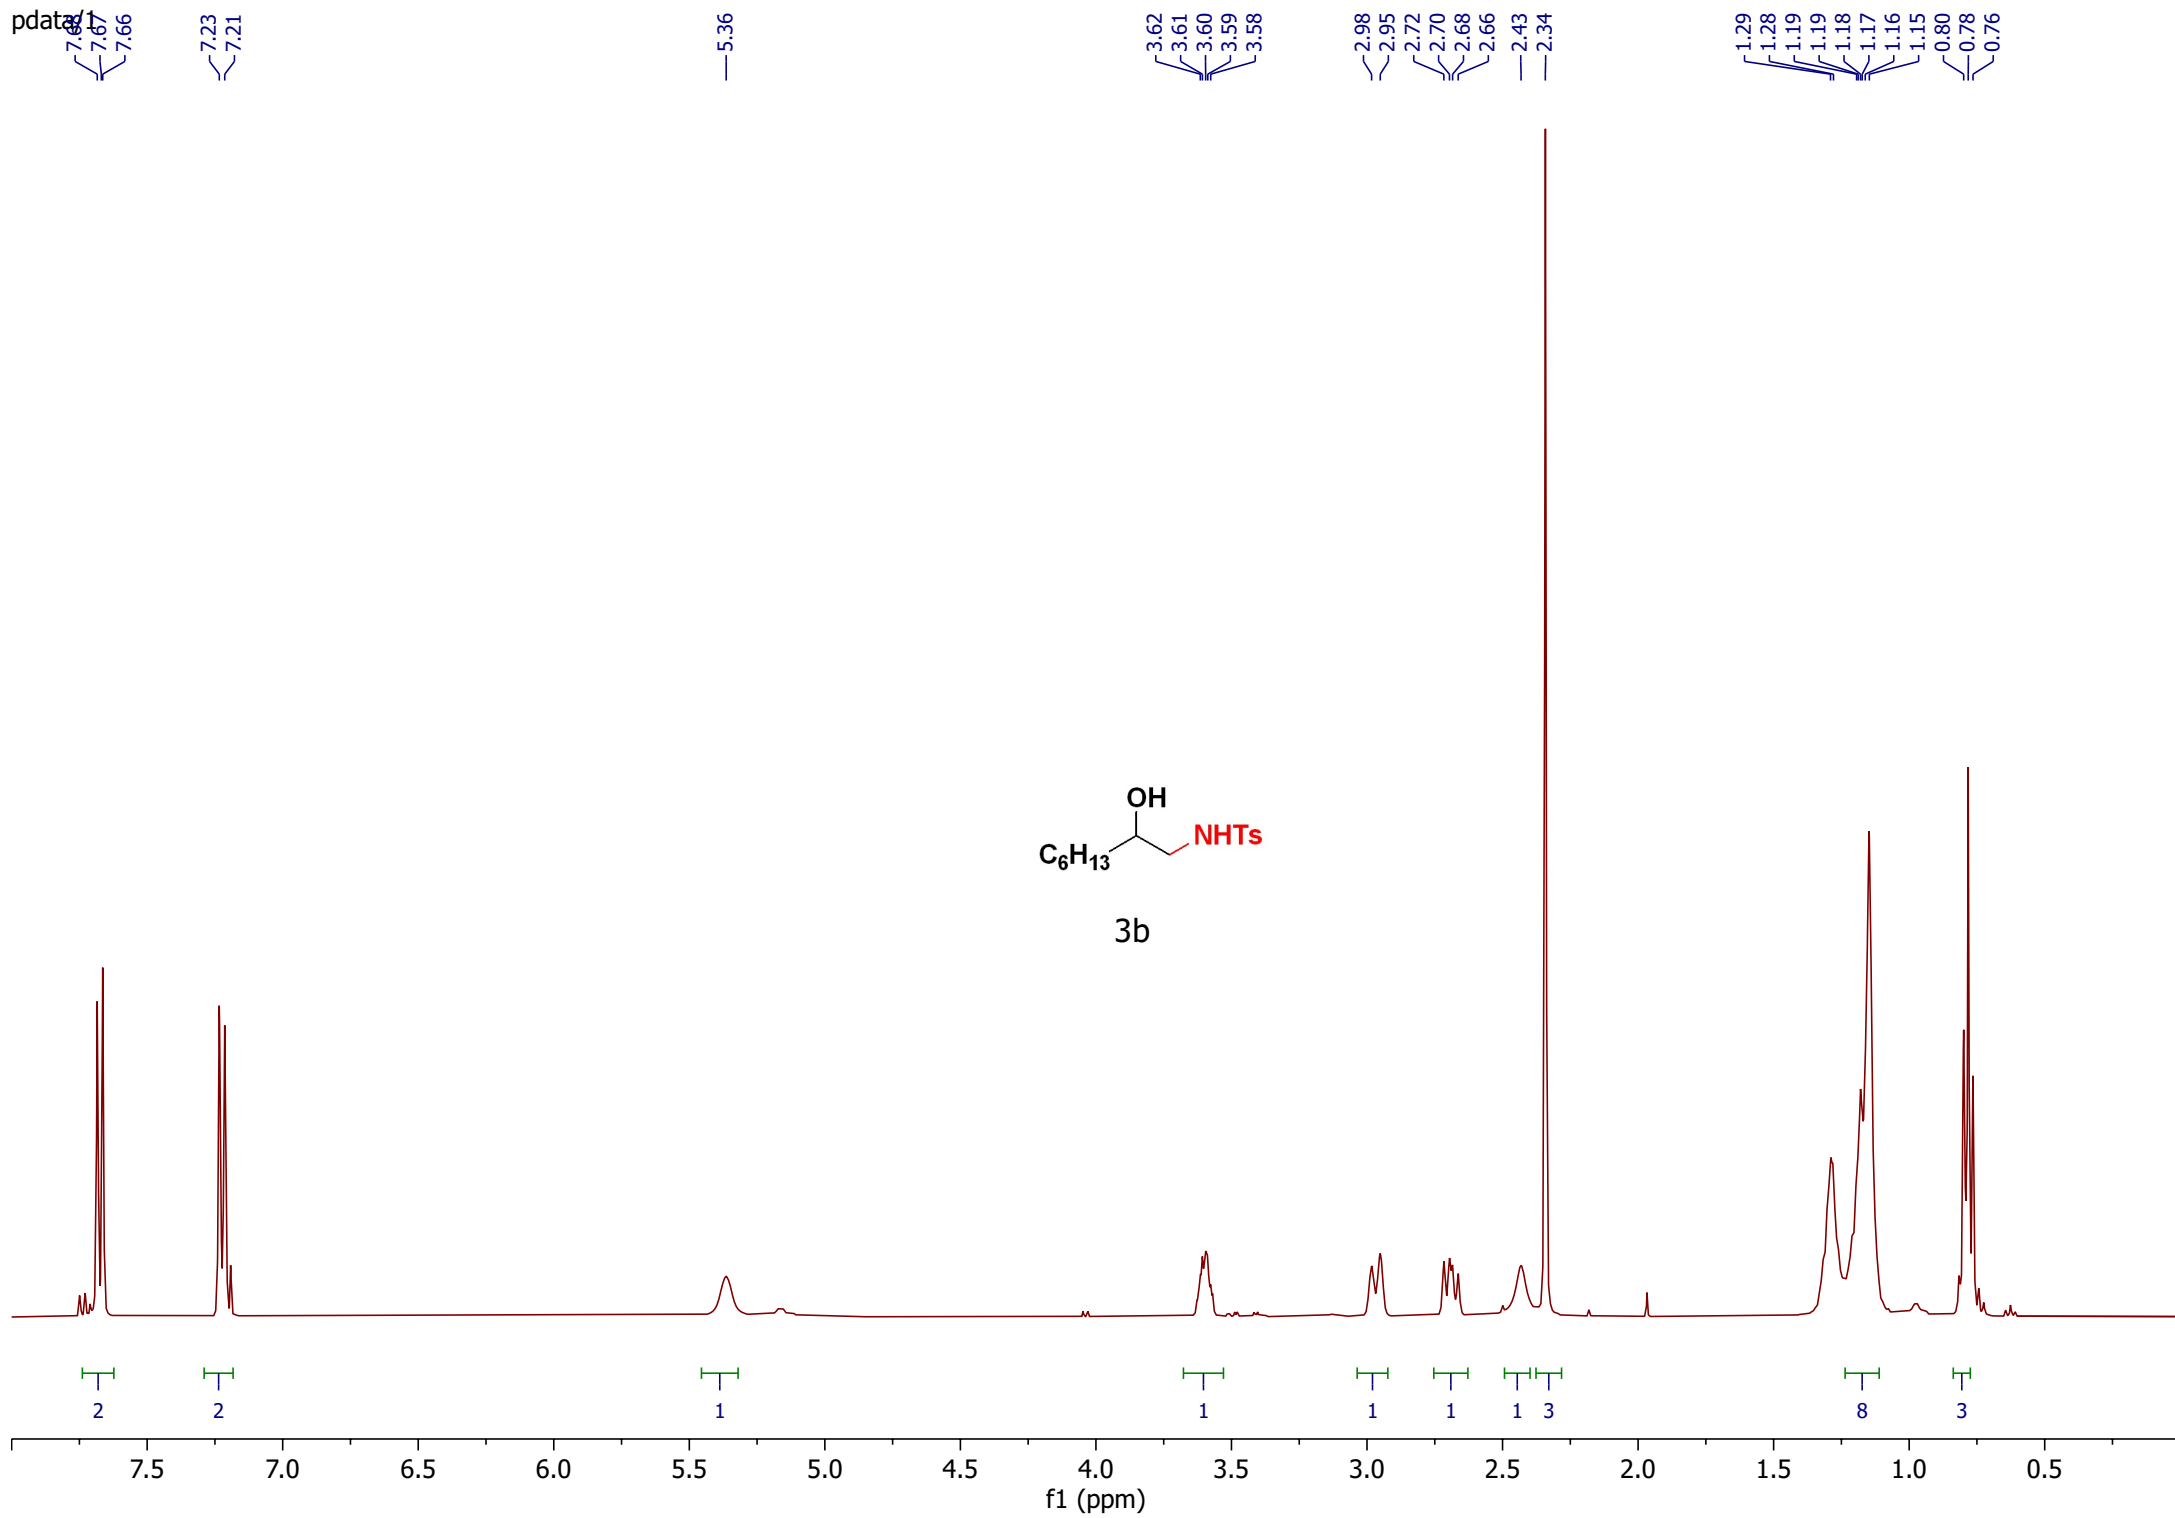

— 143.52 — 136.64 — 129.79 — 127.12 — 70.51 — 48.72 — 34.59 — 31.72 — 29.17 — 25.35 — 22.60 — 21.56 — 14.10

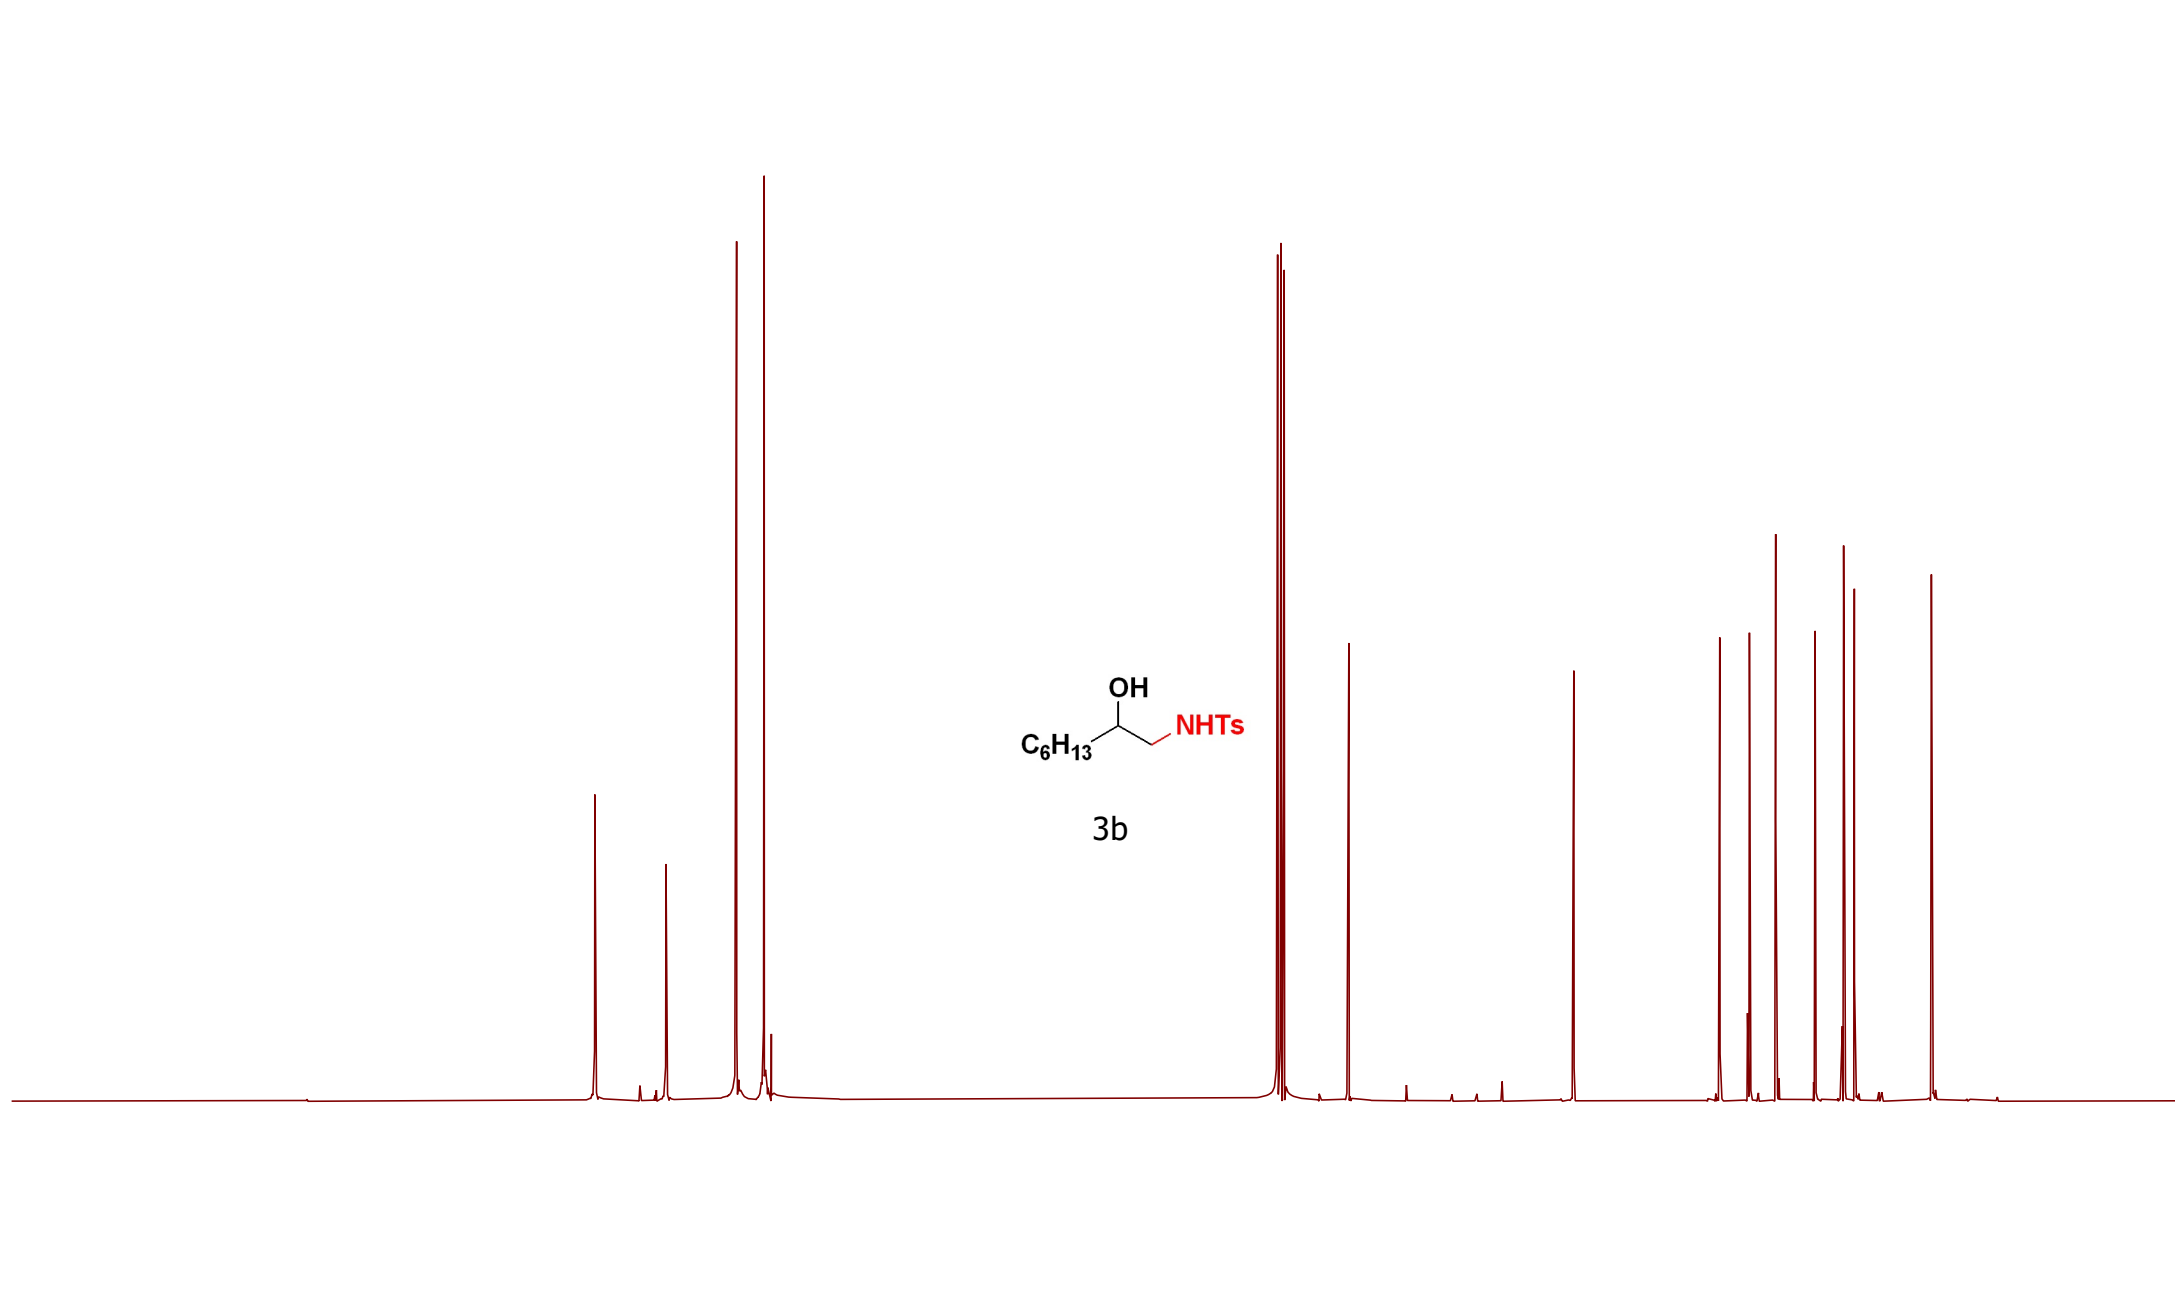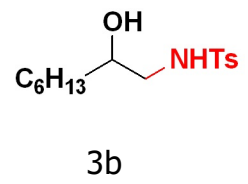

190 180 170 160 150 140 130 120 110 100 90 80 70 60 50 40 30 20 10 0

f1 (ppm)

pdata/1

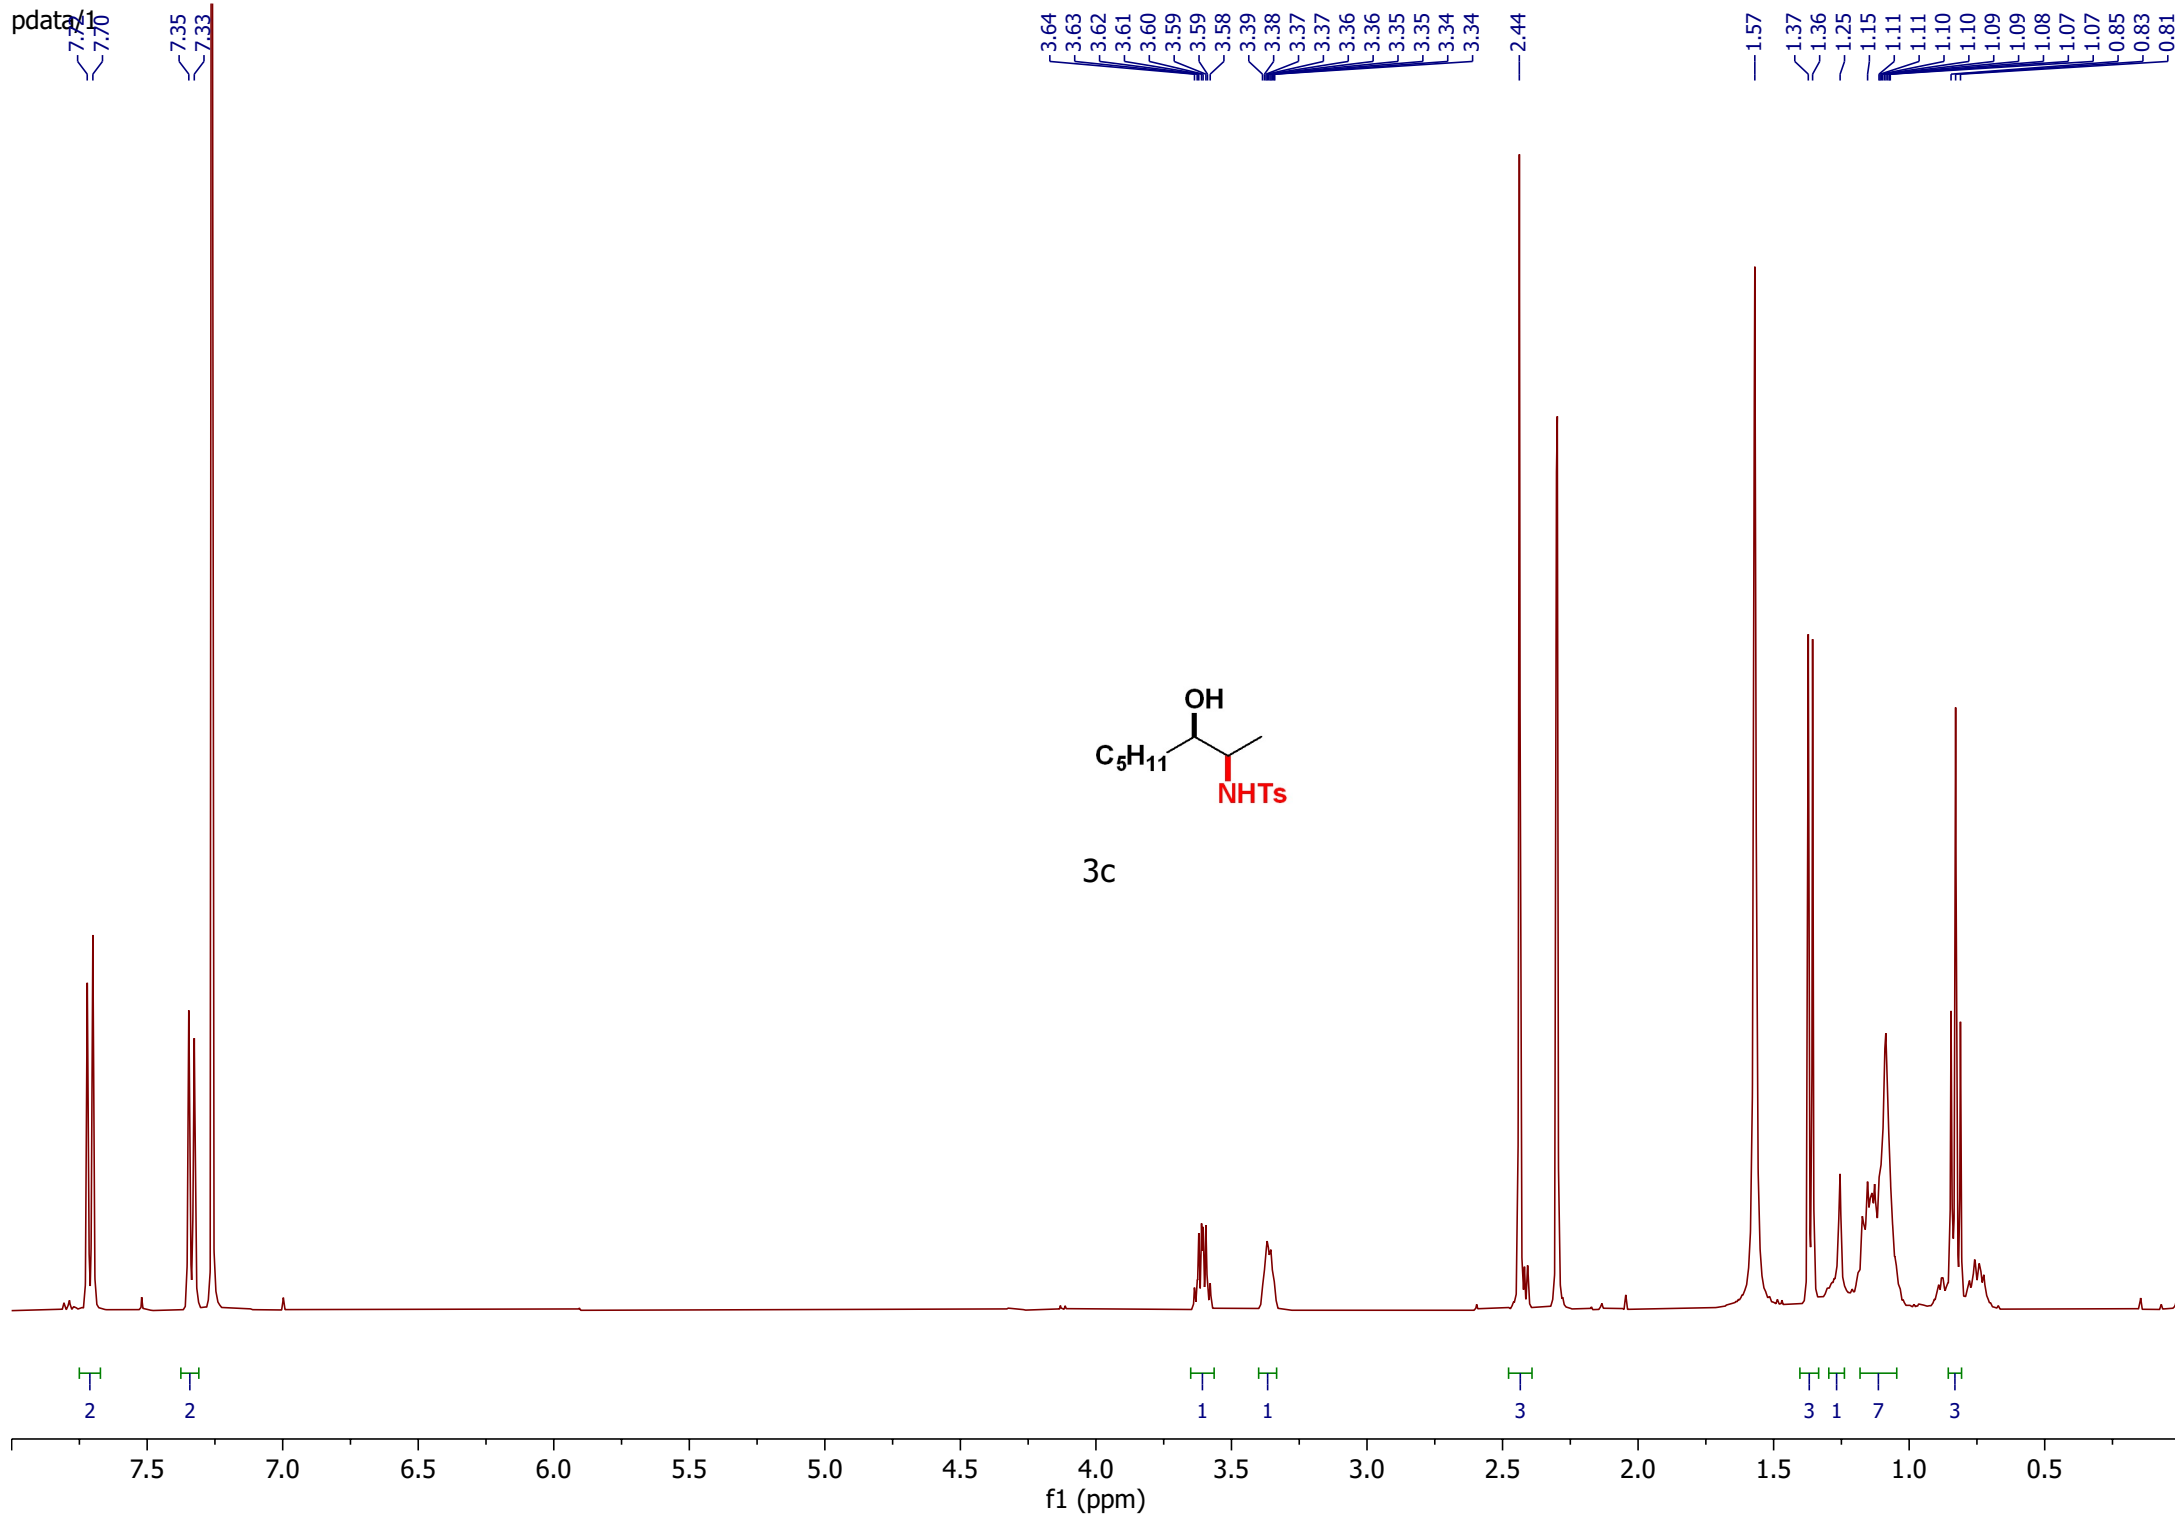

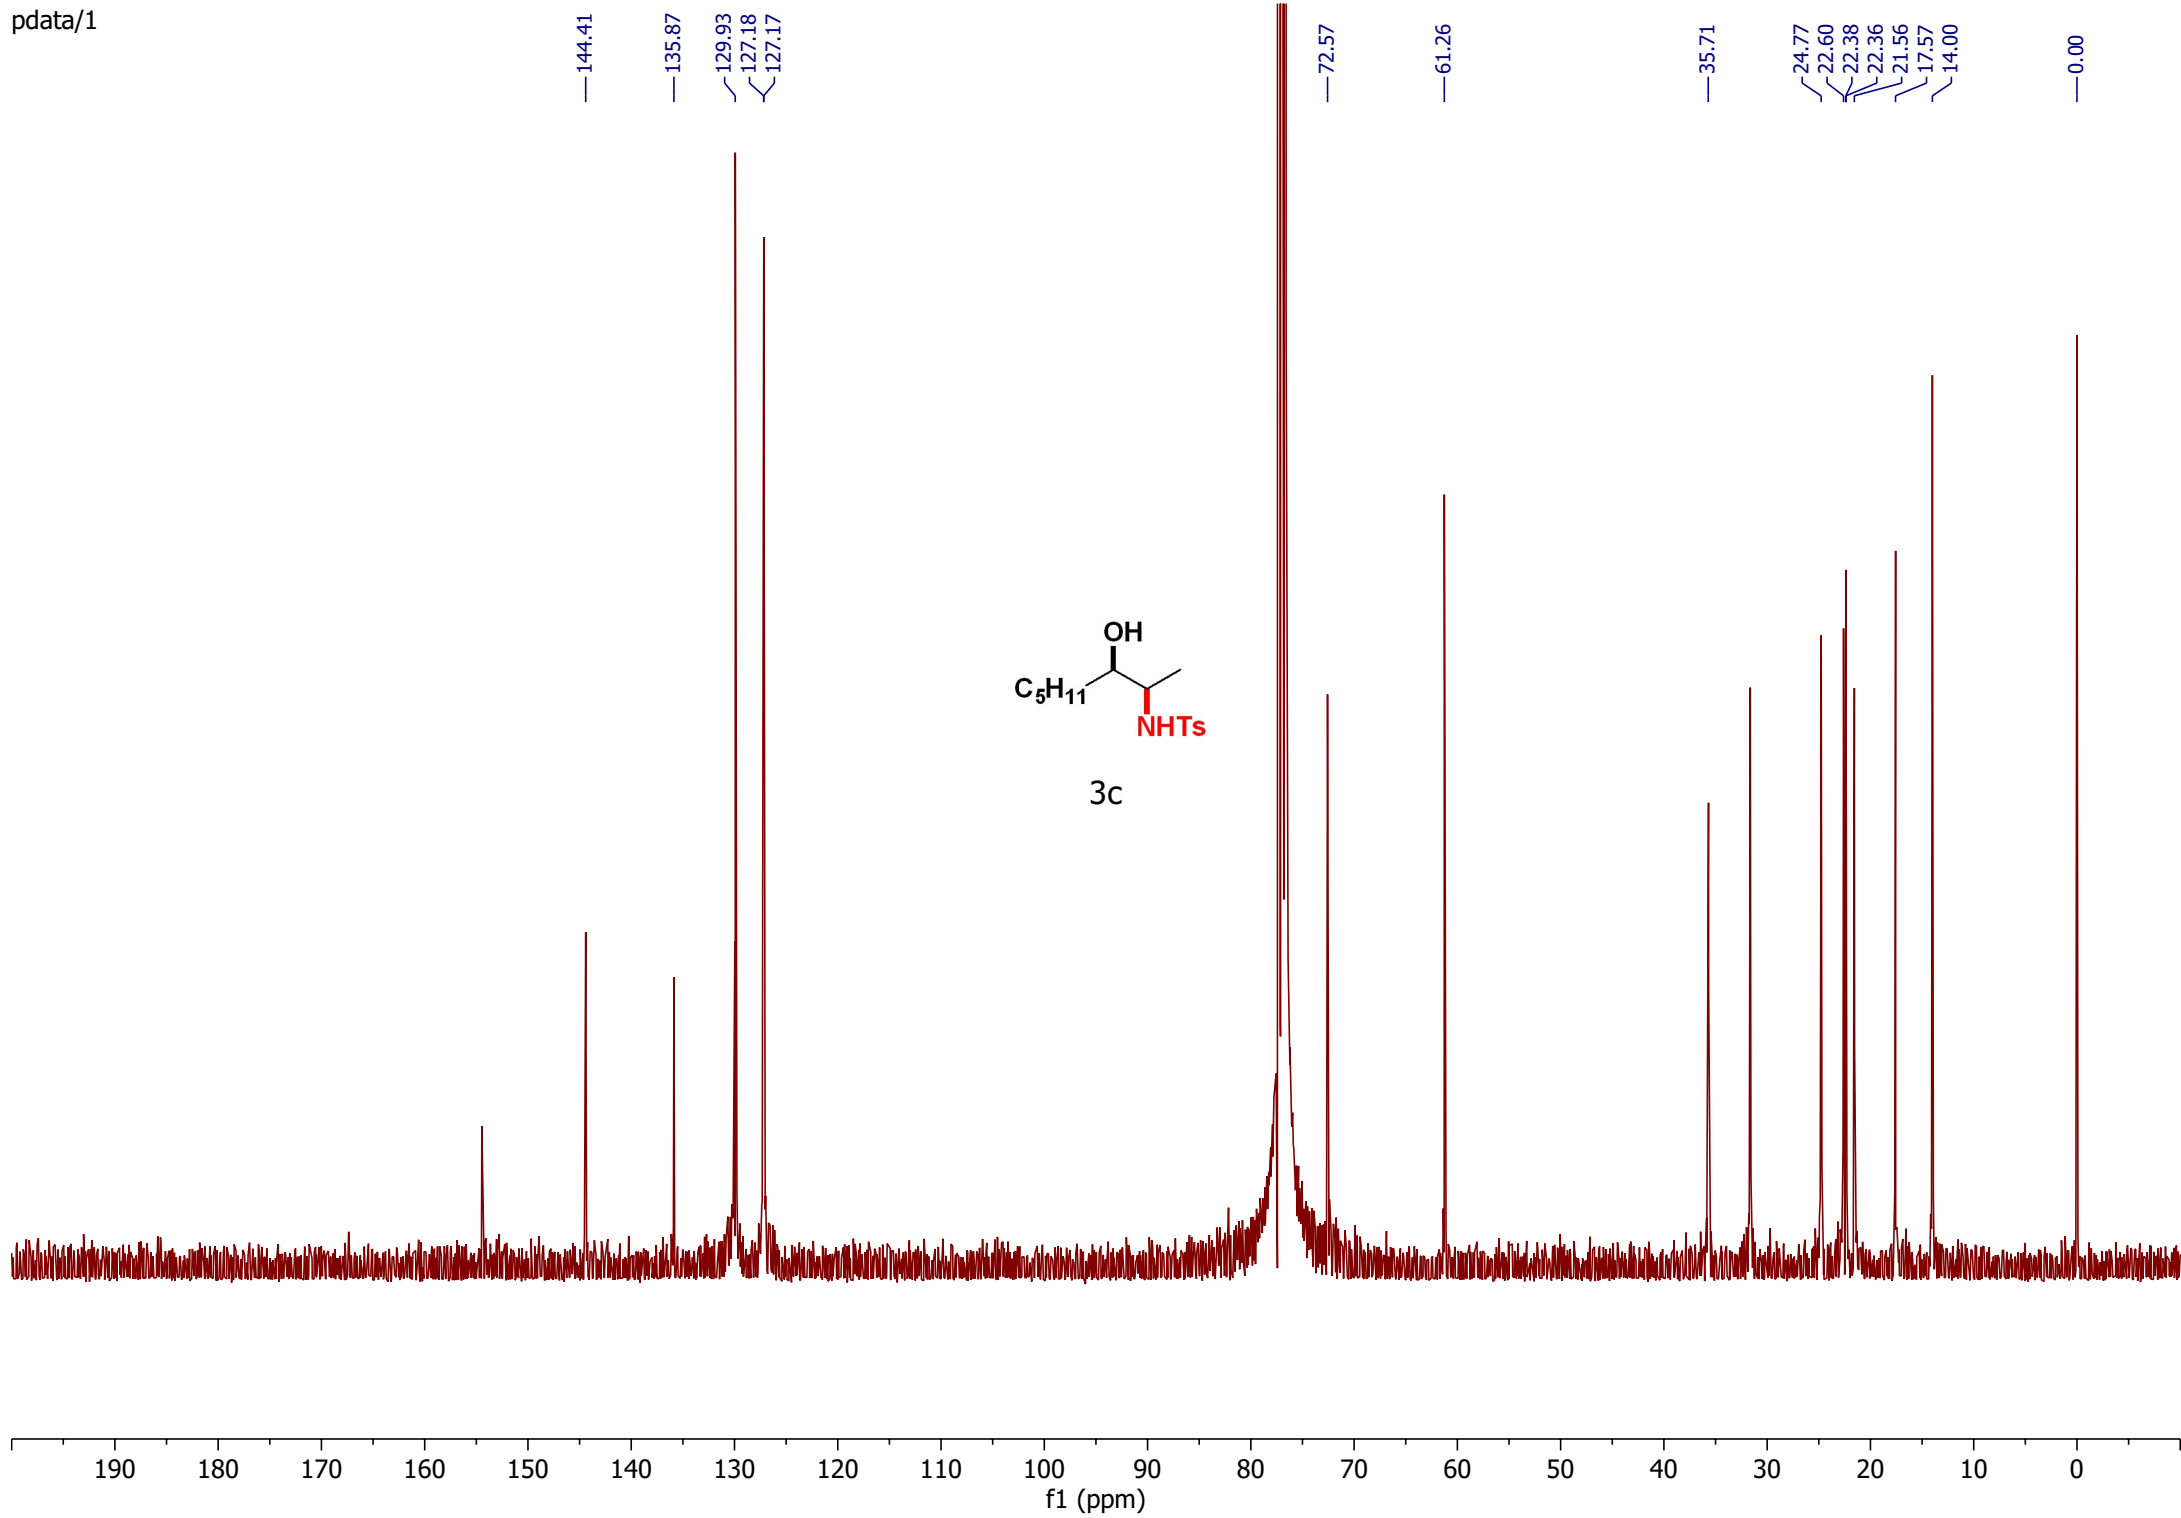

pdata/4

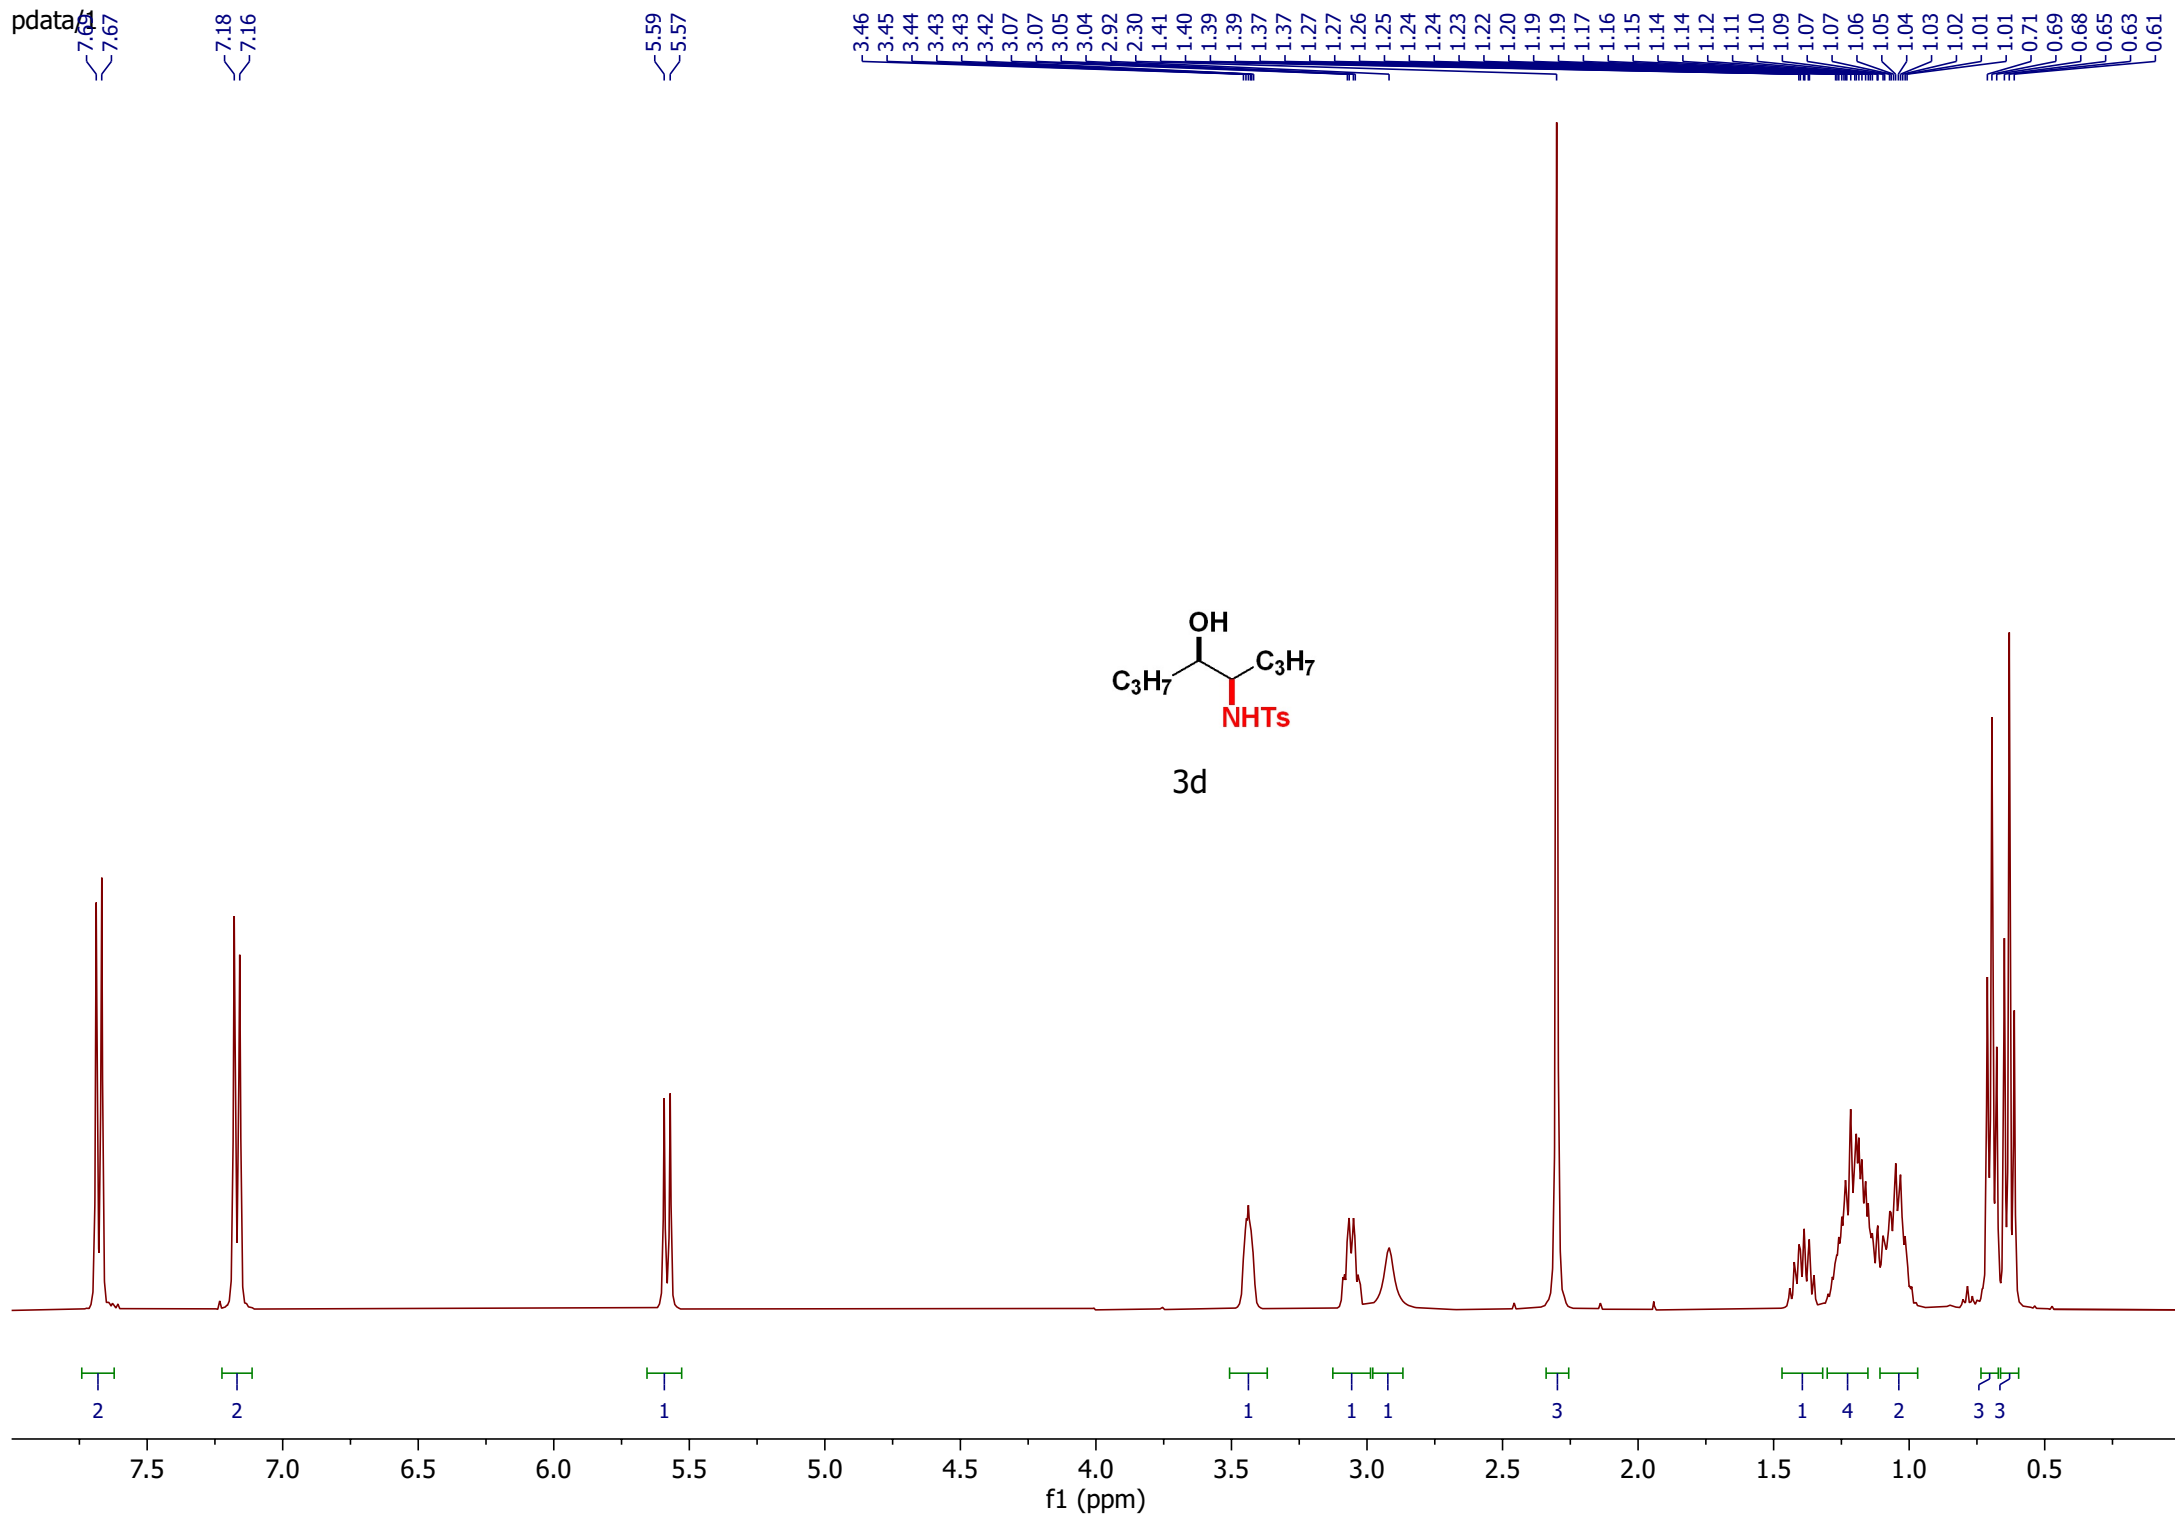

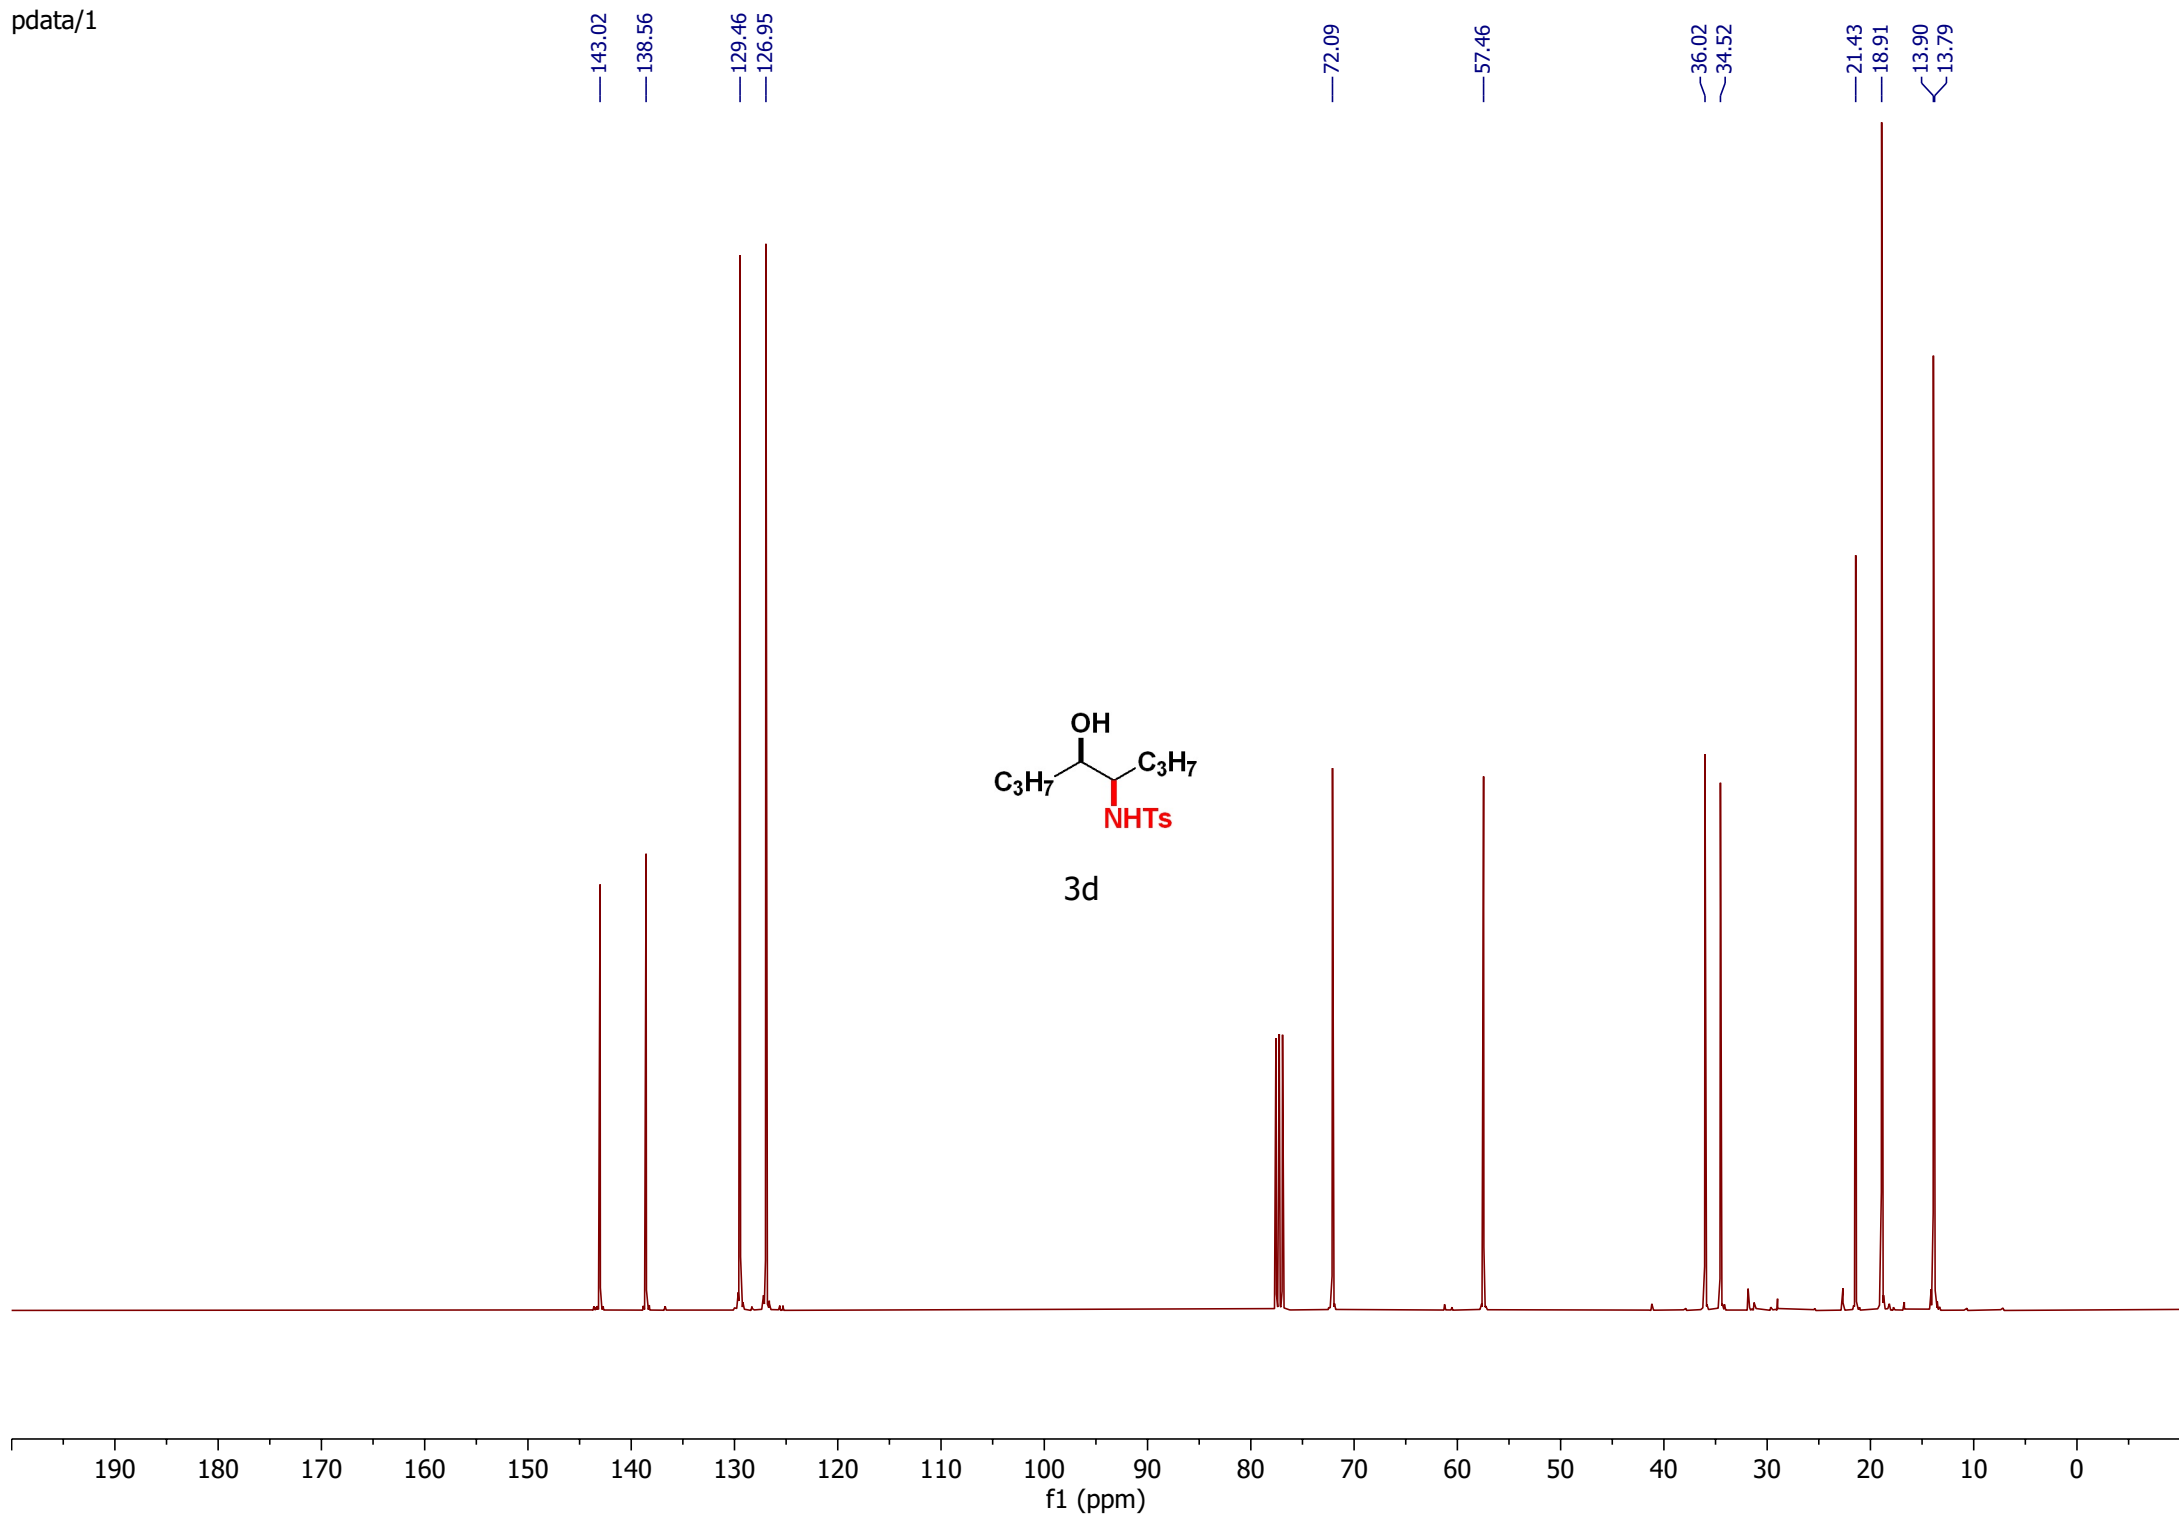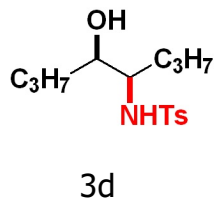

pdata/1

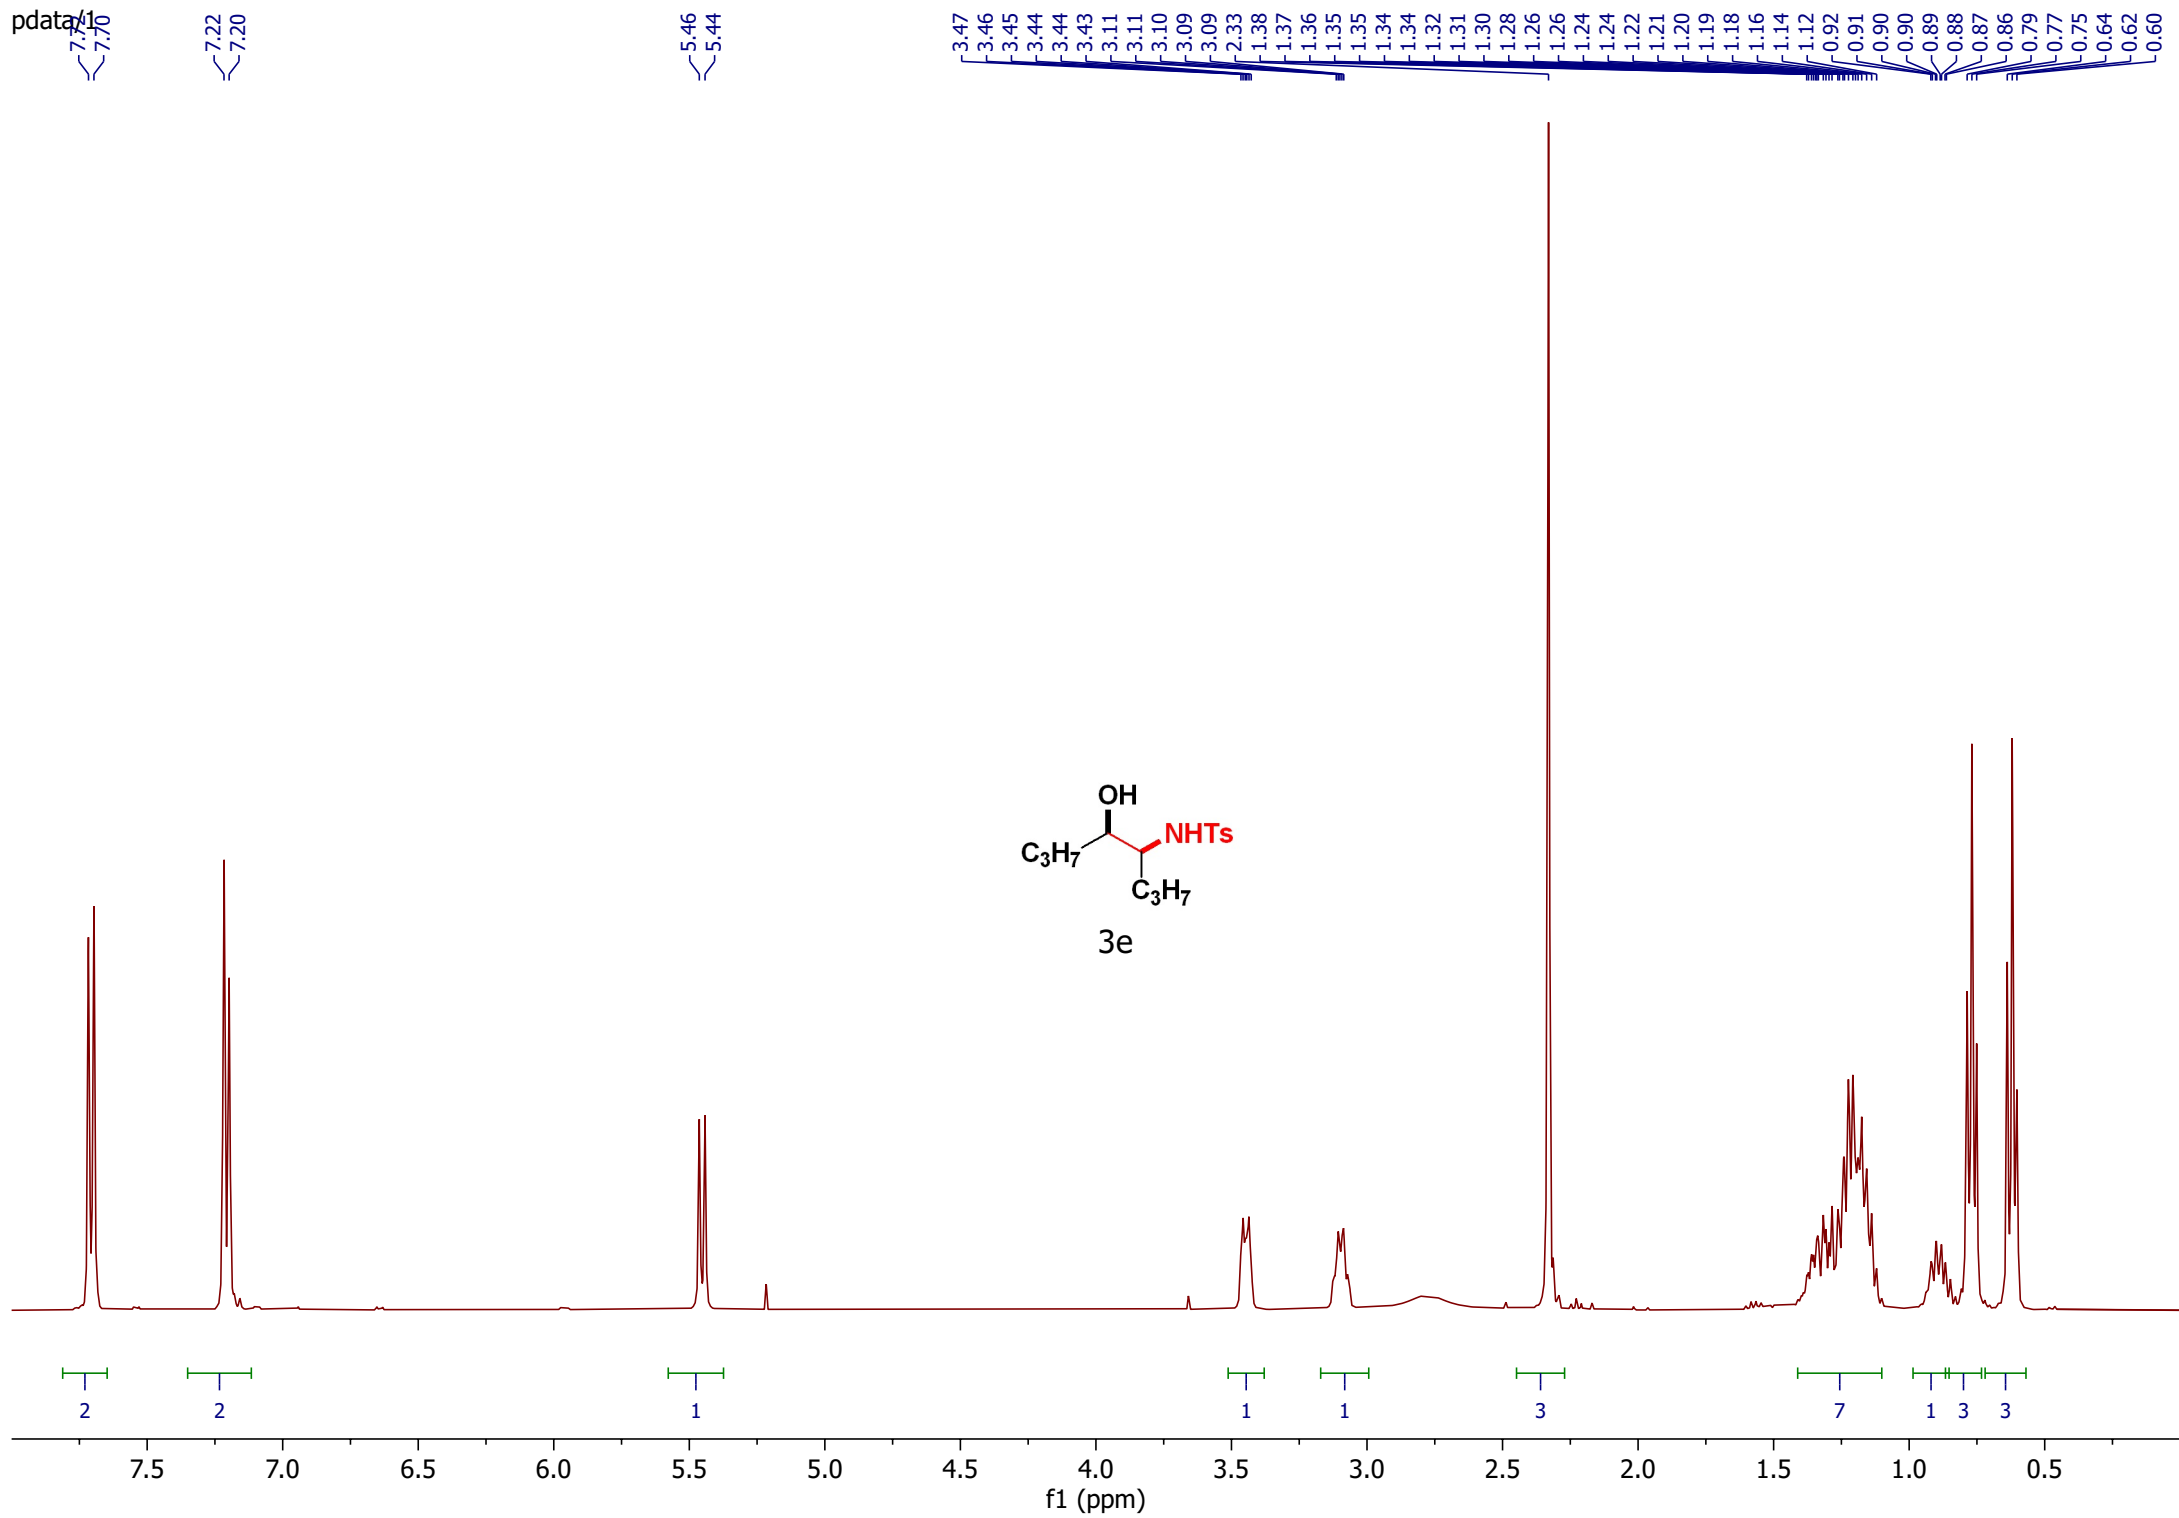

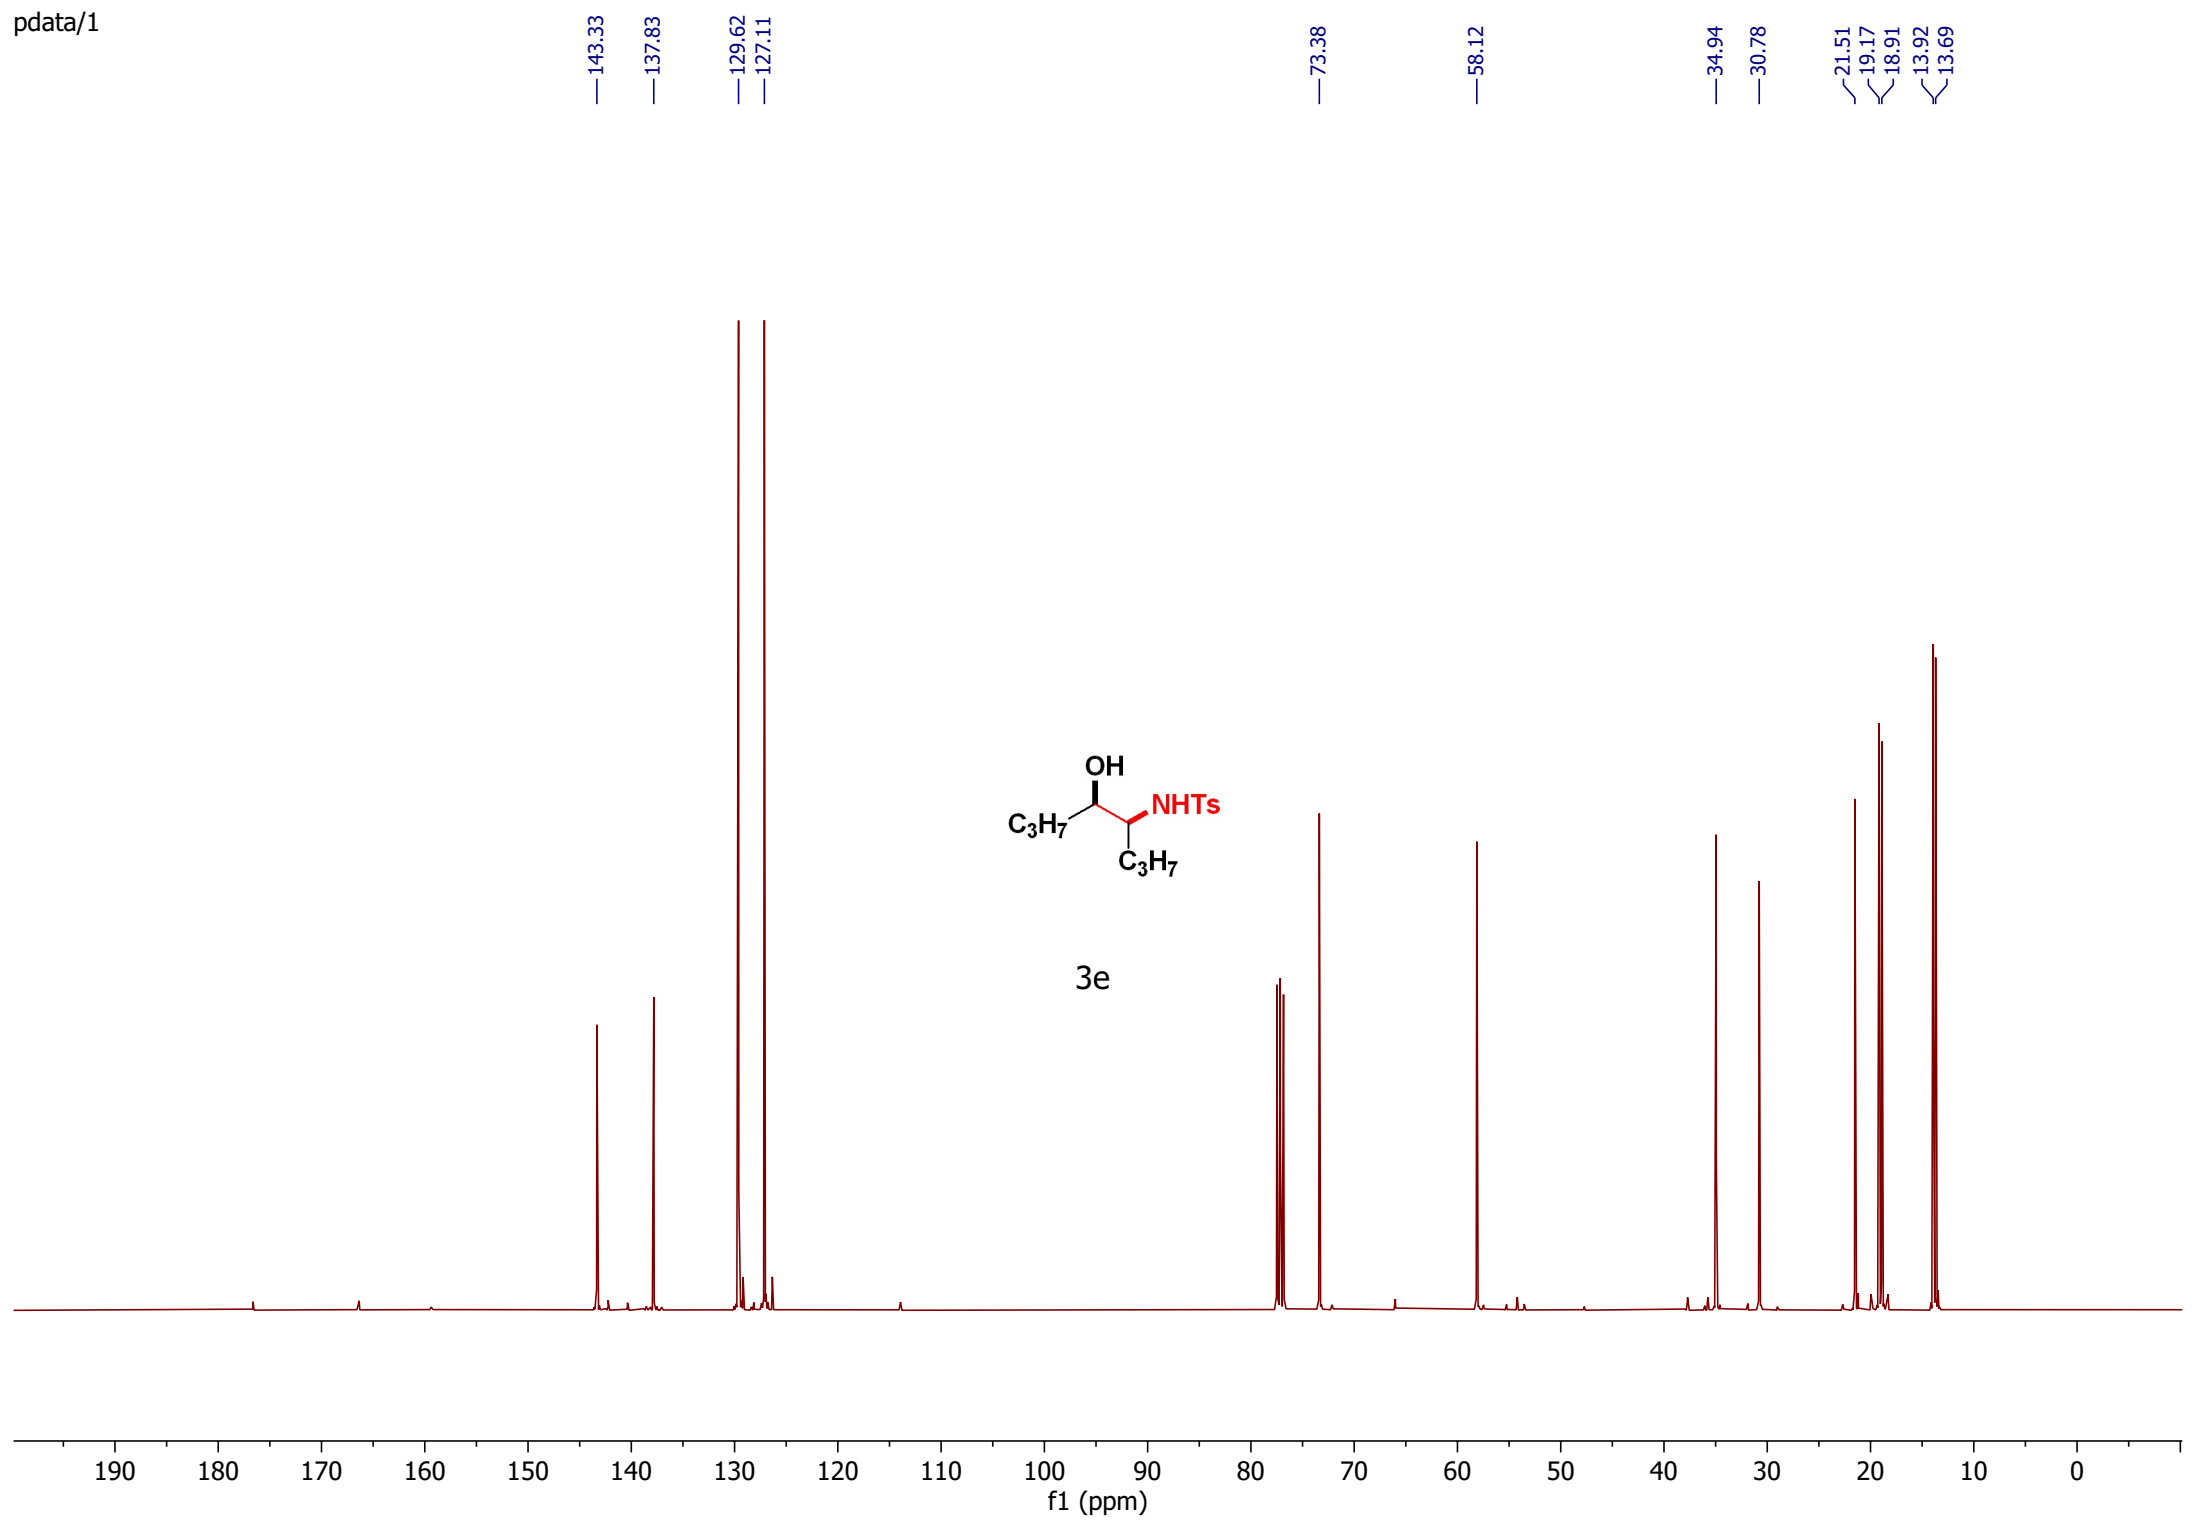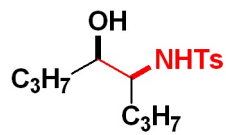

3e



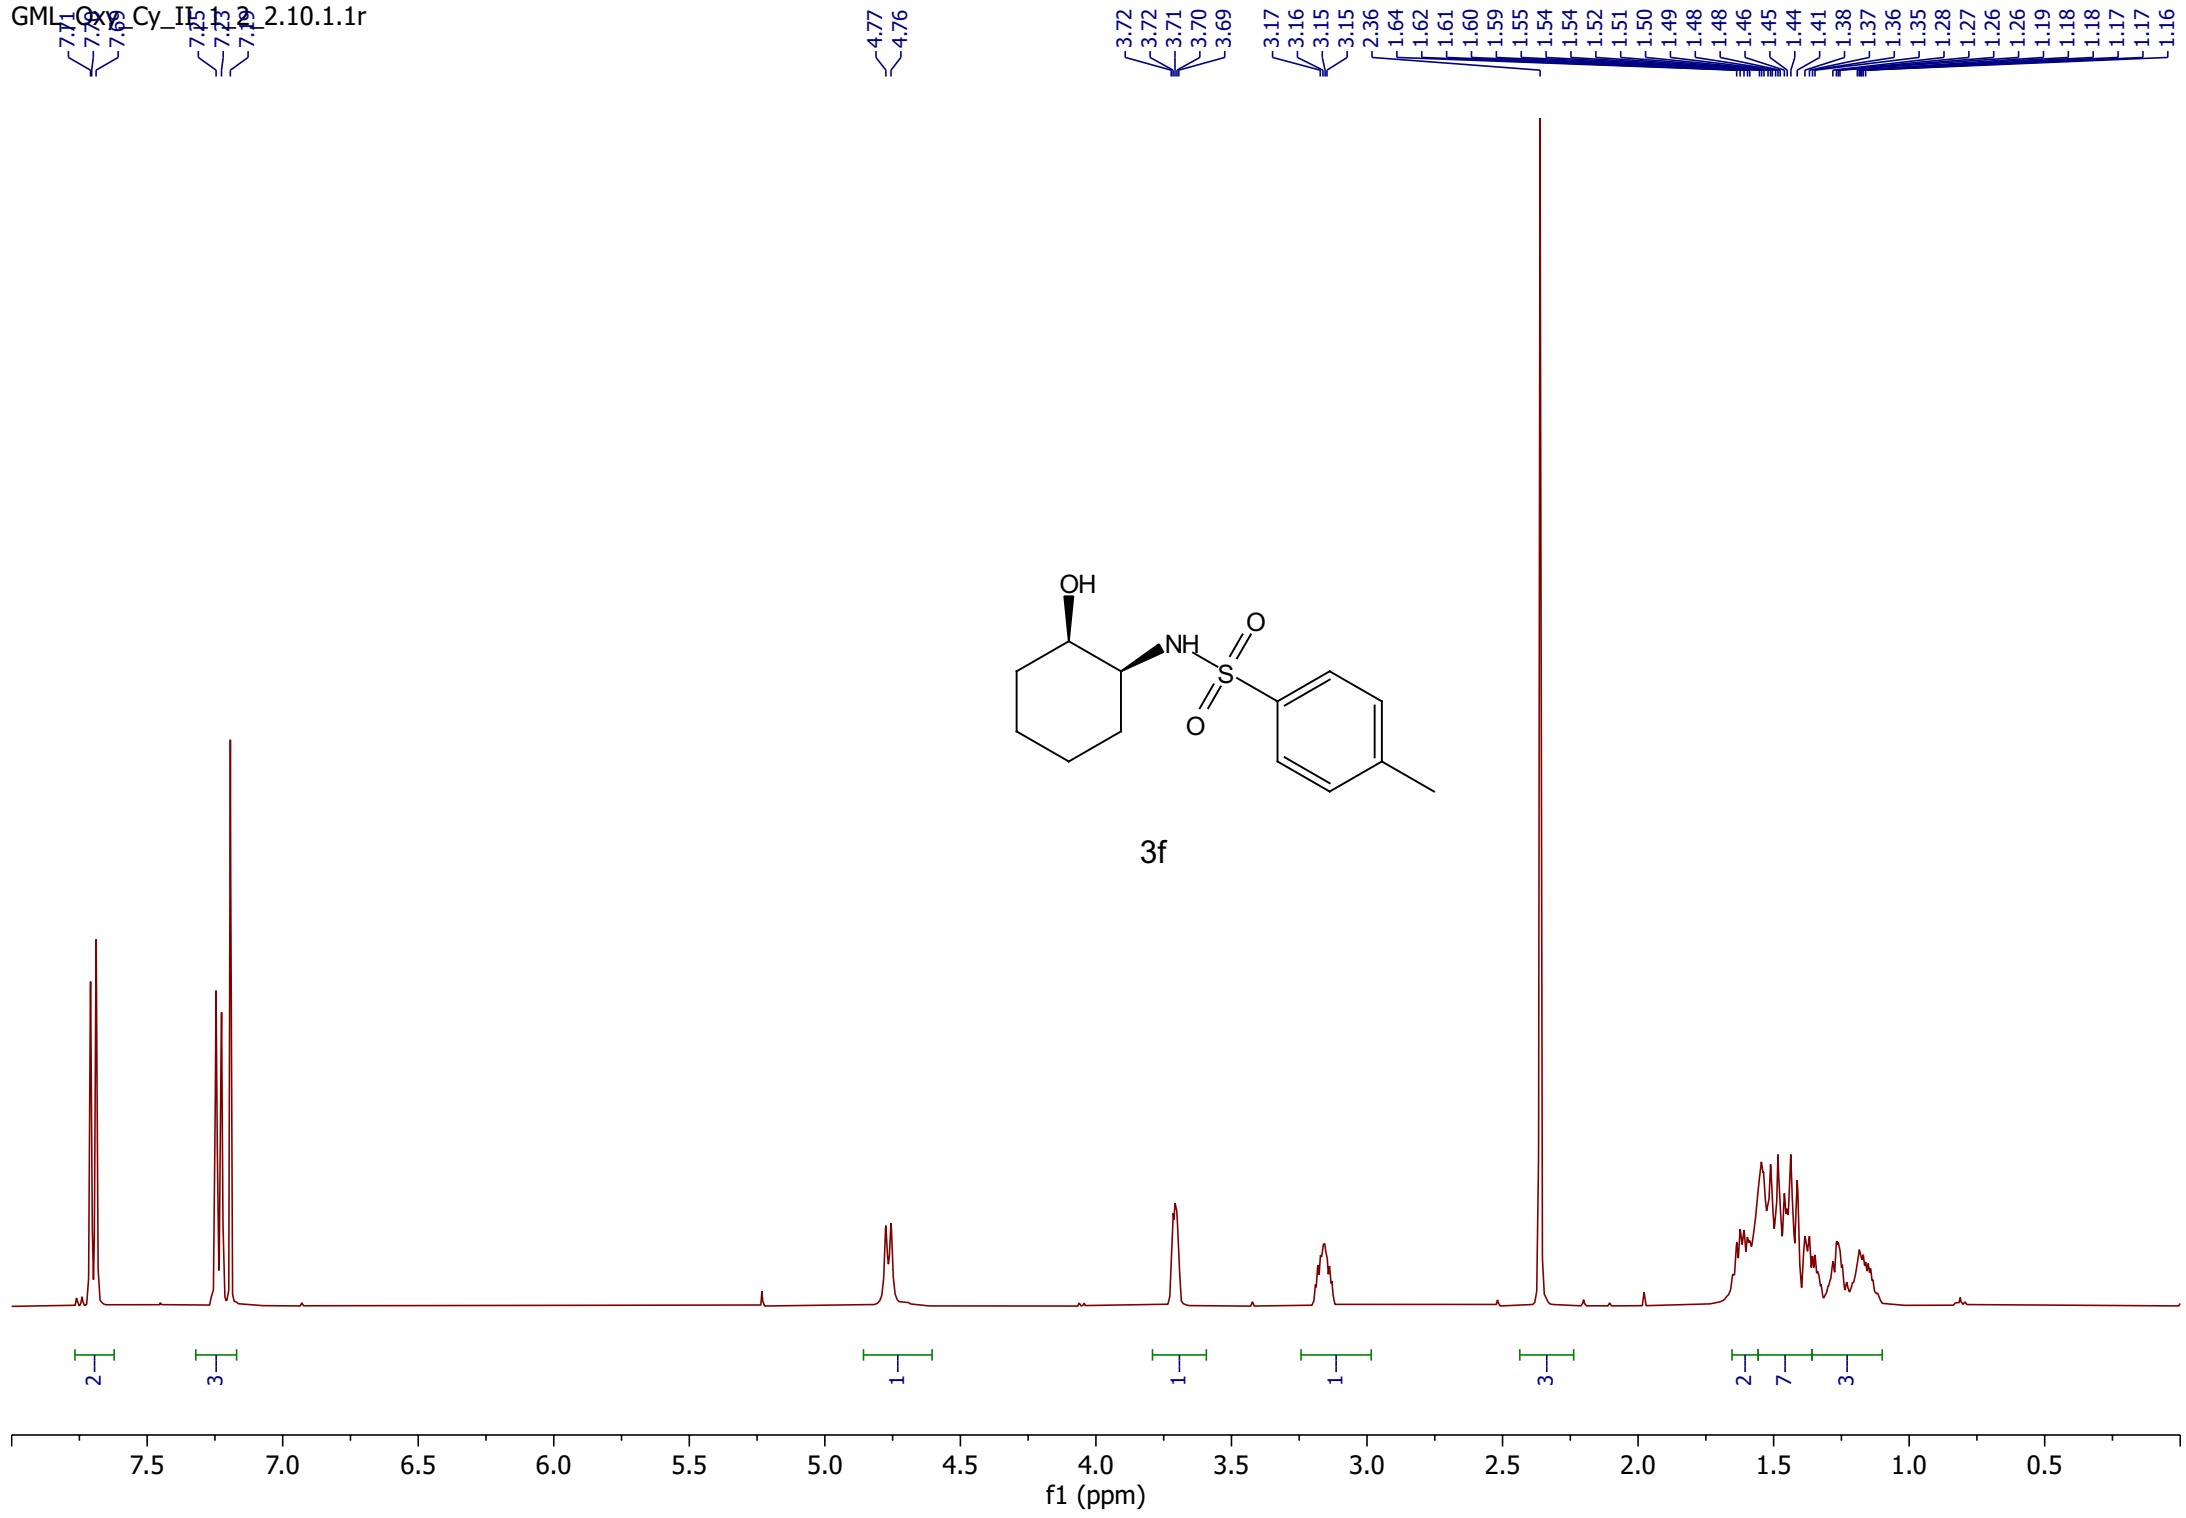

143.42  
137.98  
137.96  
129.79  
129.76  
126.99  
77.35  
77.24  
77.04  
76.72  
68.77  
55.10  
31.49  
31.45  
28.01  
27.98  
23.34  
21.58  
21.56  
19.79

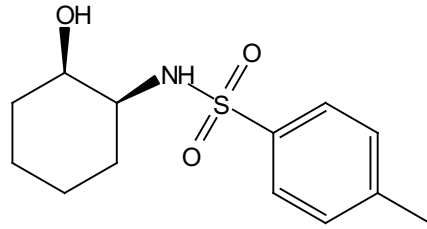

3f

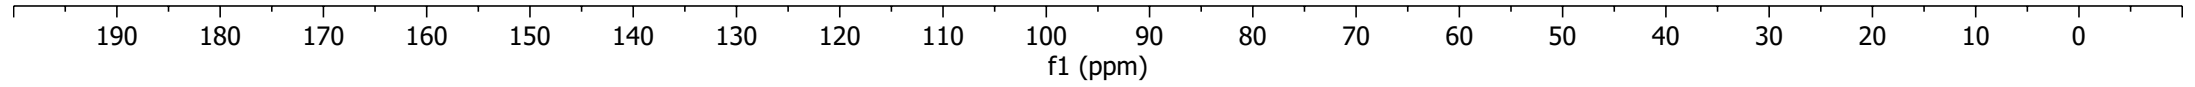

pdata/

7.67  
7.67

7.22  
7.20

5.03  
5.01

2.96  
2.94  
2.92  
2.90

2.34  
1.64  
1.63  
1.61  
1.60  
1.52  
1.51  
1.49  
1.48  
1.48  
1.36  
1.35  
1.34  
1.32

1.07

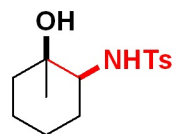

3g

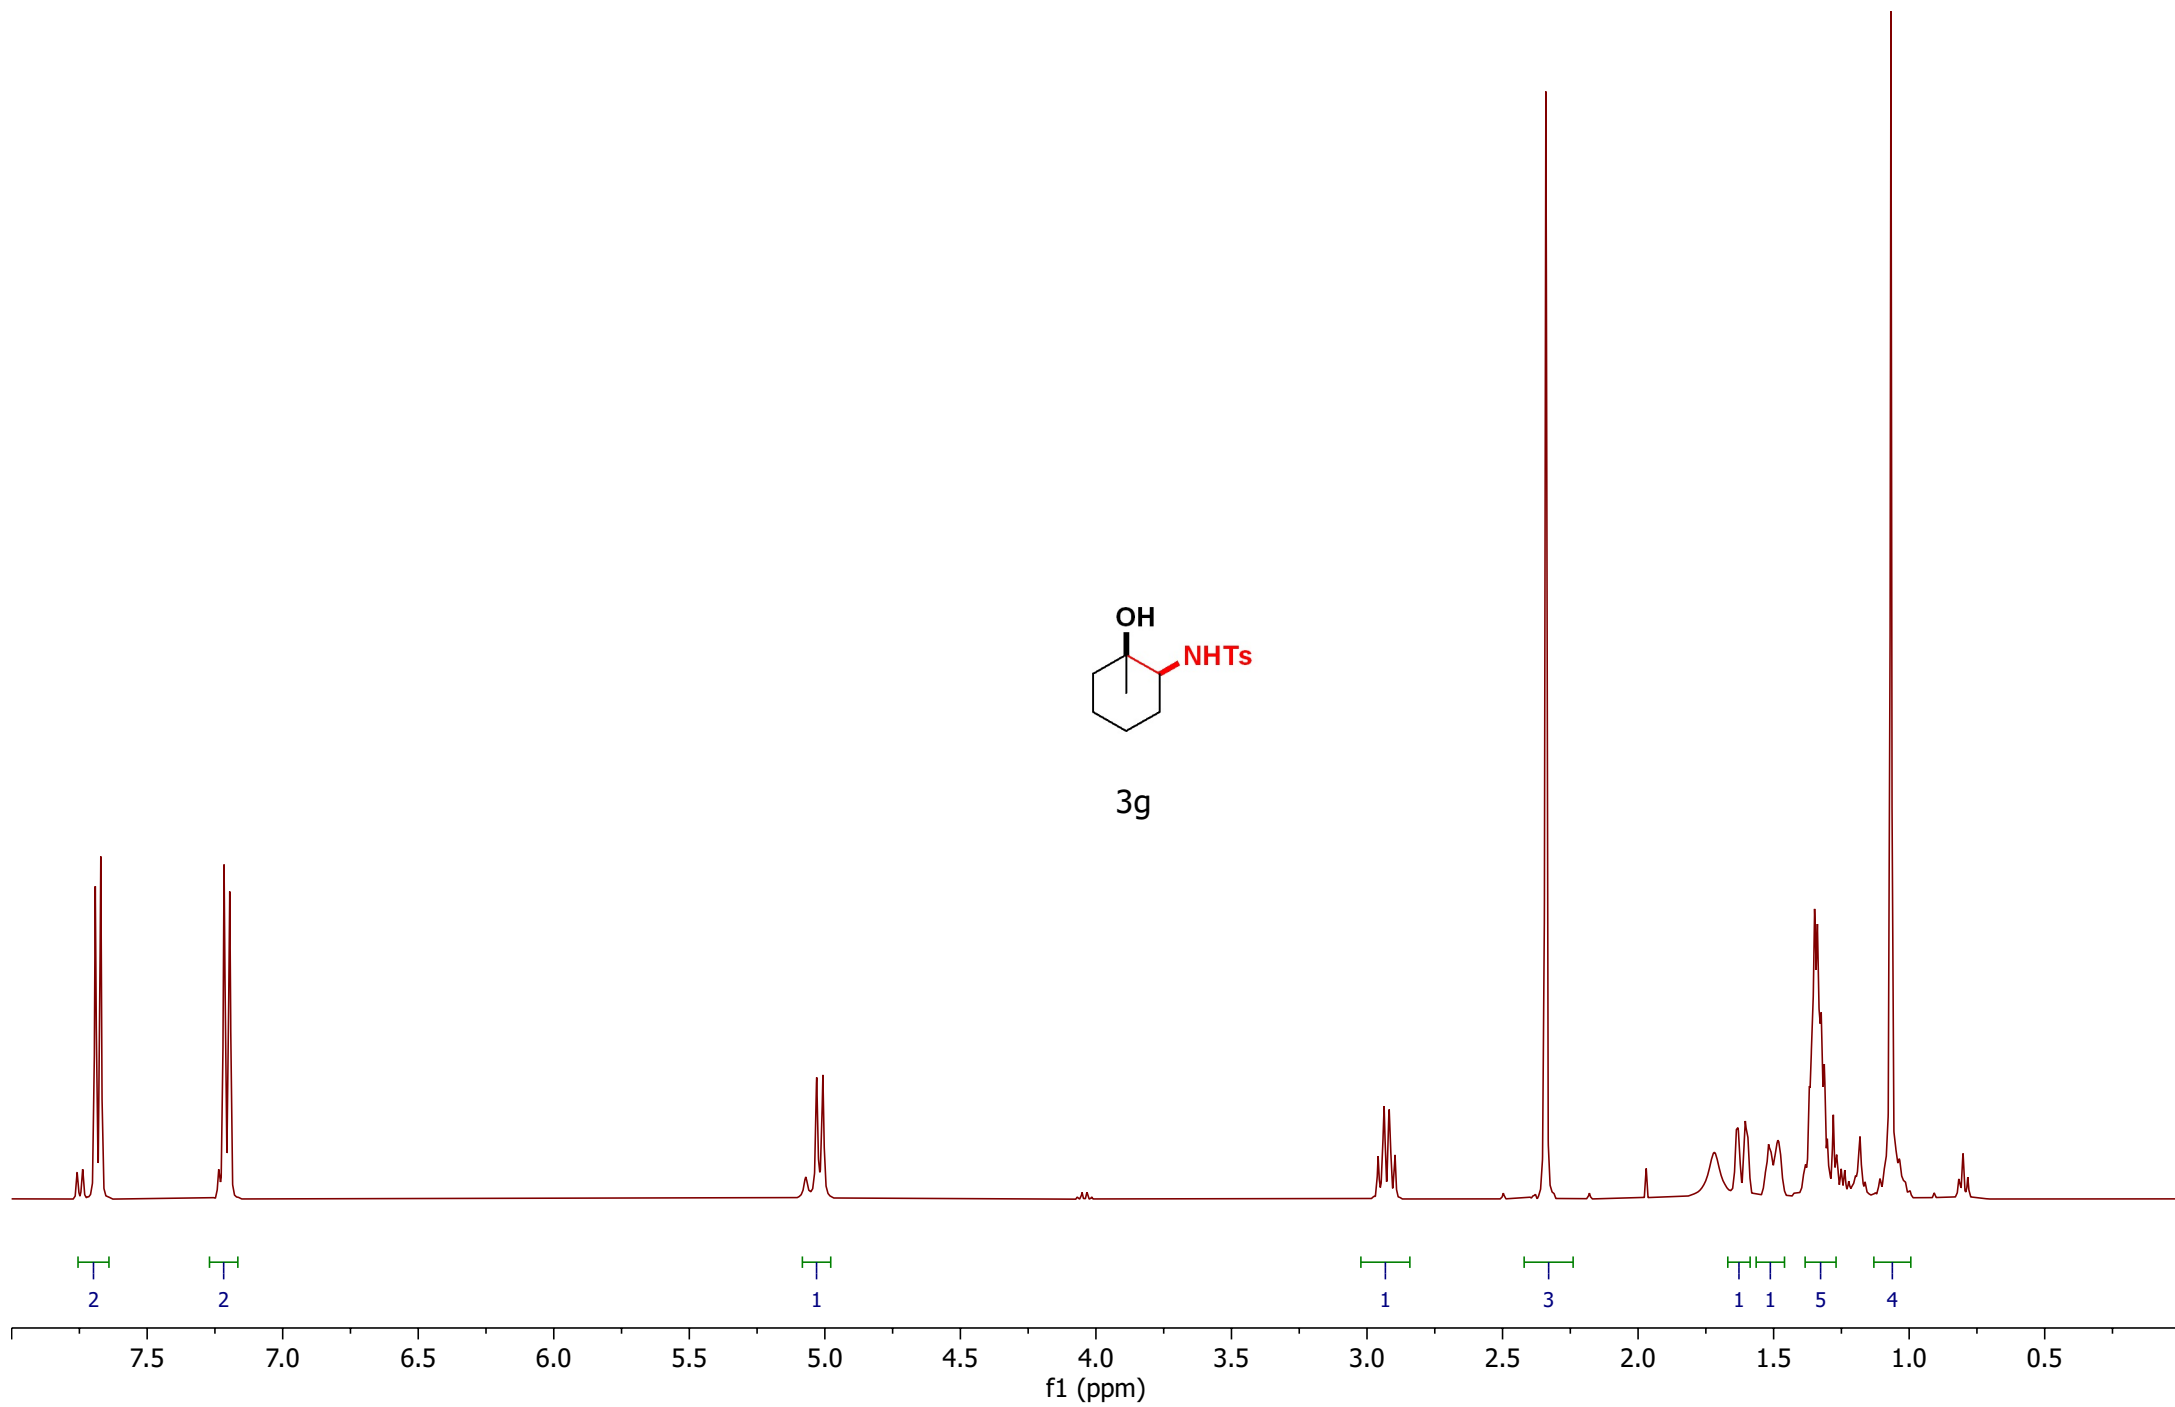

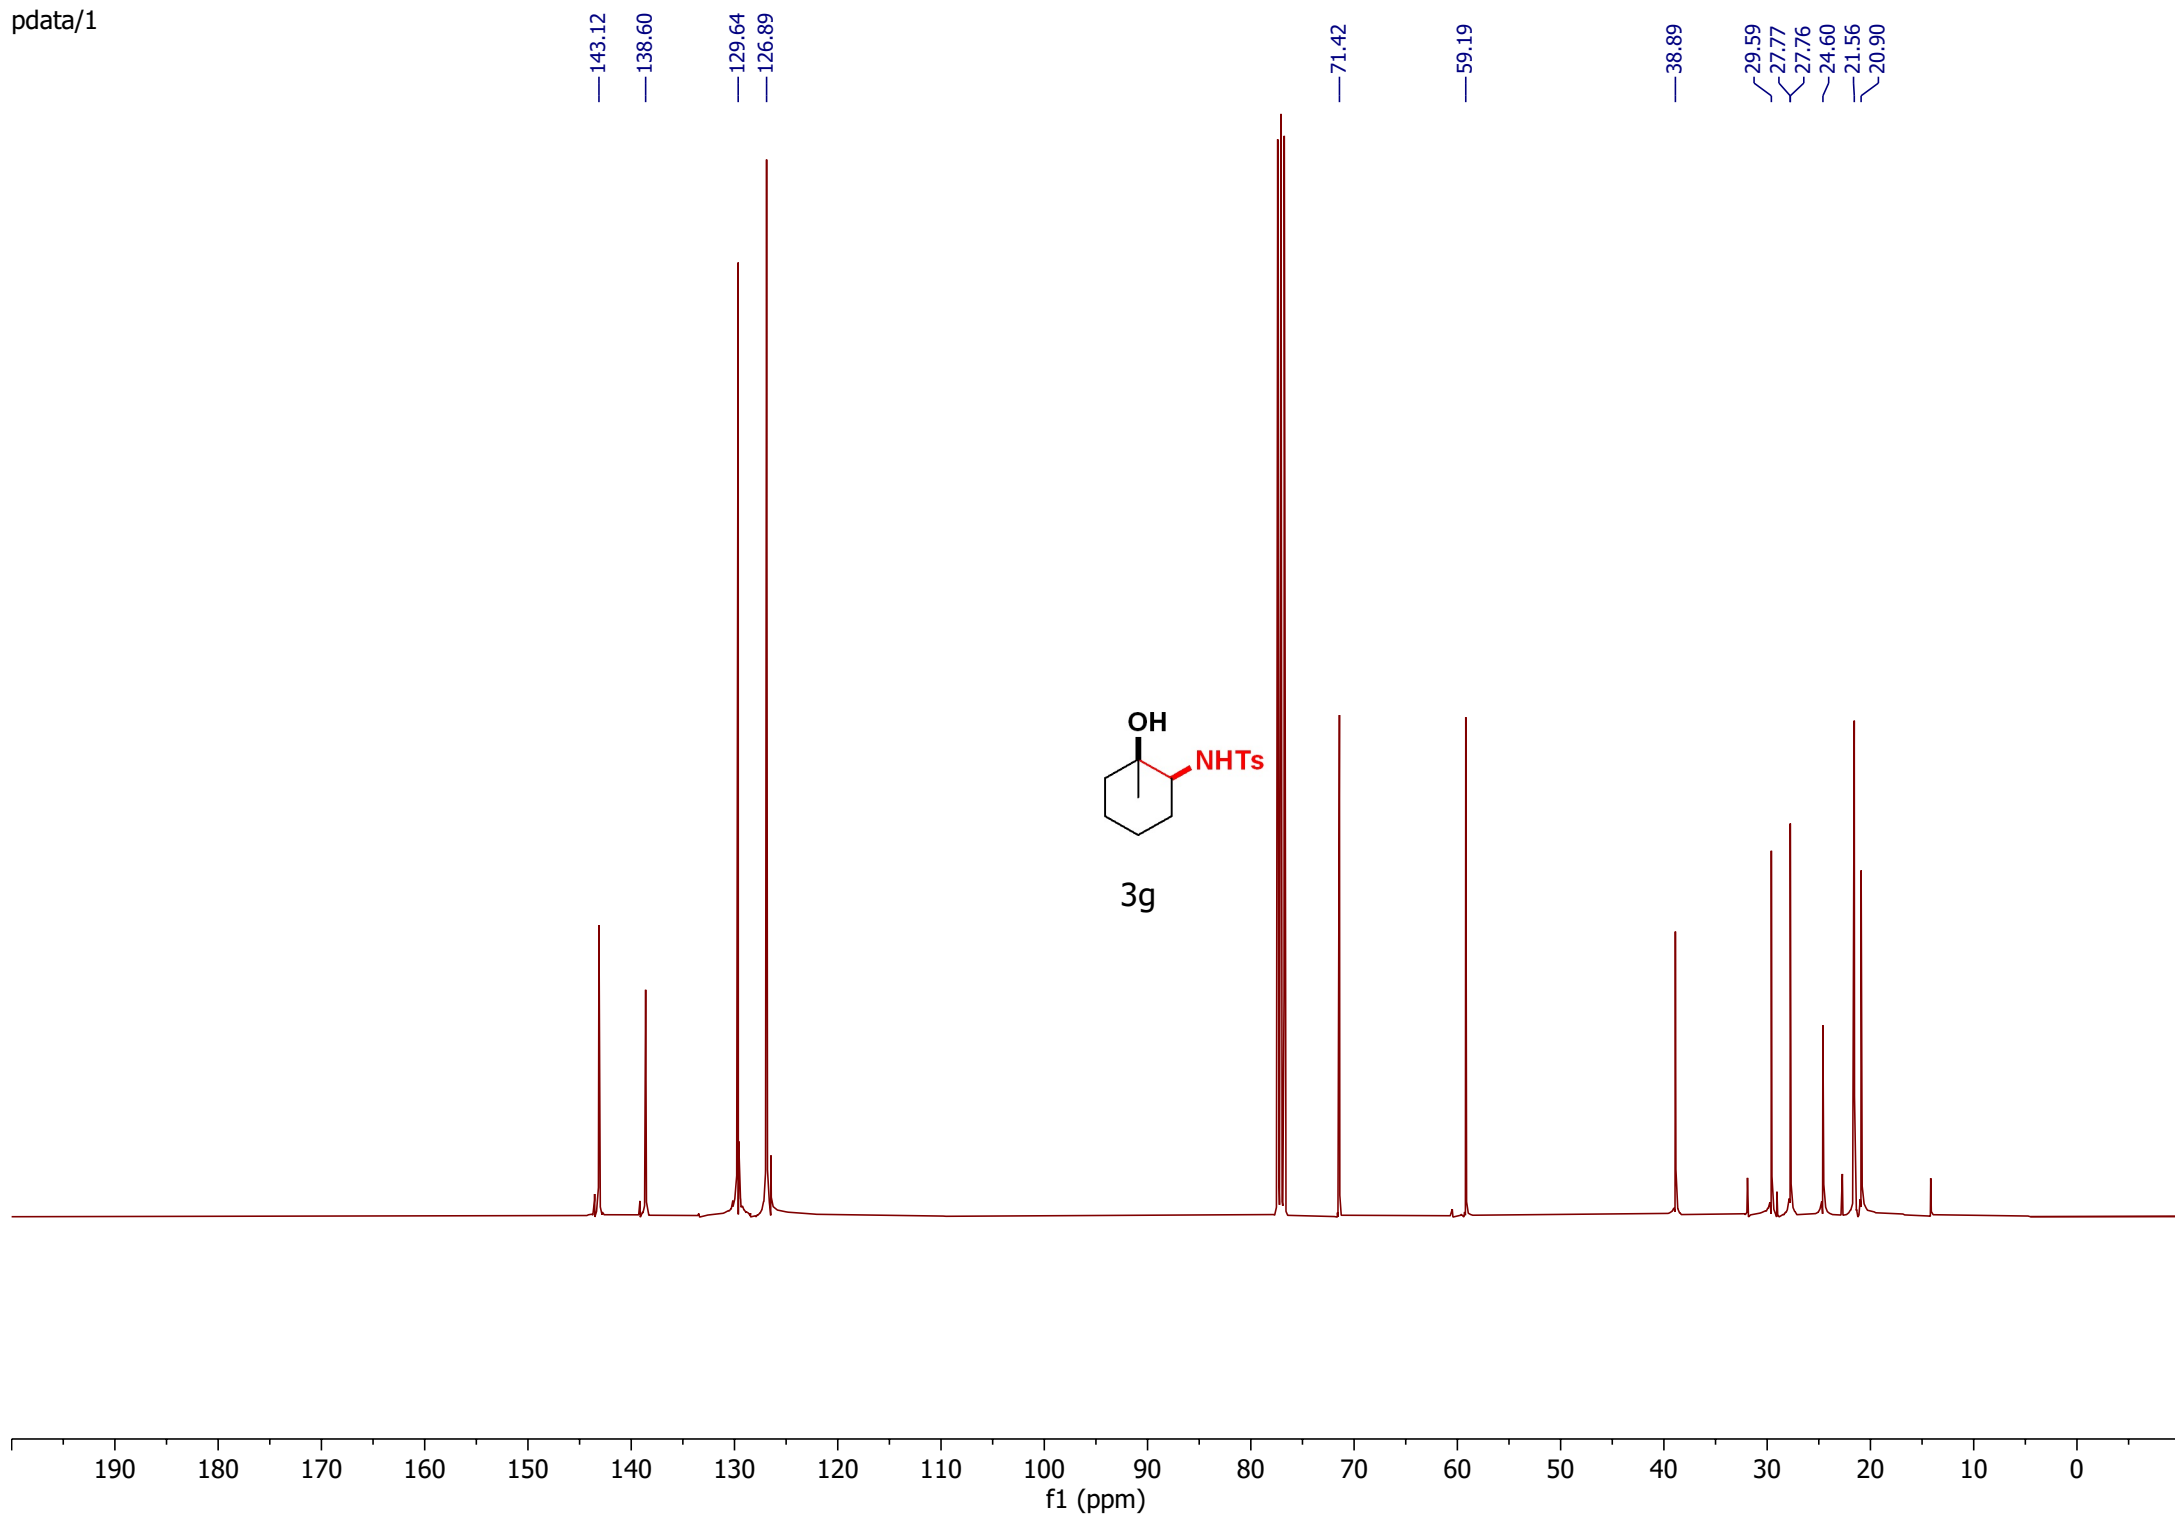

pdata/1  
ELD-73-P-TT16

7.31  
7.29  
5.02  
5.00  
3.96  
3.96  
3.94  
3.94  
3.93  
3.92  
3.91  
3.41  
3.40  
3.39  
3.39  
3.38  
3.37  
3.36  
2.43  
2.17  
2.16  
2.15  
2.15  
2.14  
2.13  
2.12  
2.11  
2.11  
2.10  
2.07  
2.06  
2.05  
2.04  
2.02  
2.02  
2.00  
2.00  
1.96  
1.95  
1.94  
1.94  
1.92  
1.92  
1.90  
1.90  
1.89  
1.88  
1.77  
1.76  
1.75  
1.74  
1.73  
1.72  
1.71  
1.69  
1.68  
1.67  
1.65  
1.64  
1.62  
1.62  
1.61  
1.60  
1.59  
1.53  
1.52  
1.51  
1.50  
1.49  
1.48  
1.47  
1.46  
1.45  
1.43  
1.37  
1.36  
1.34  
1.33  
1.33  
1.31

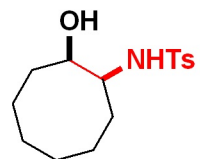

3h

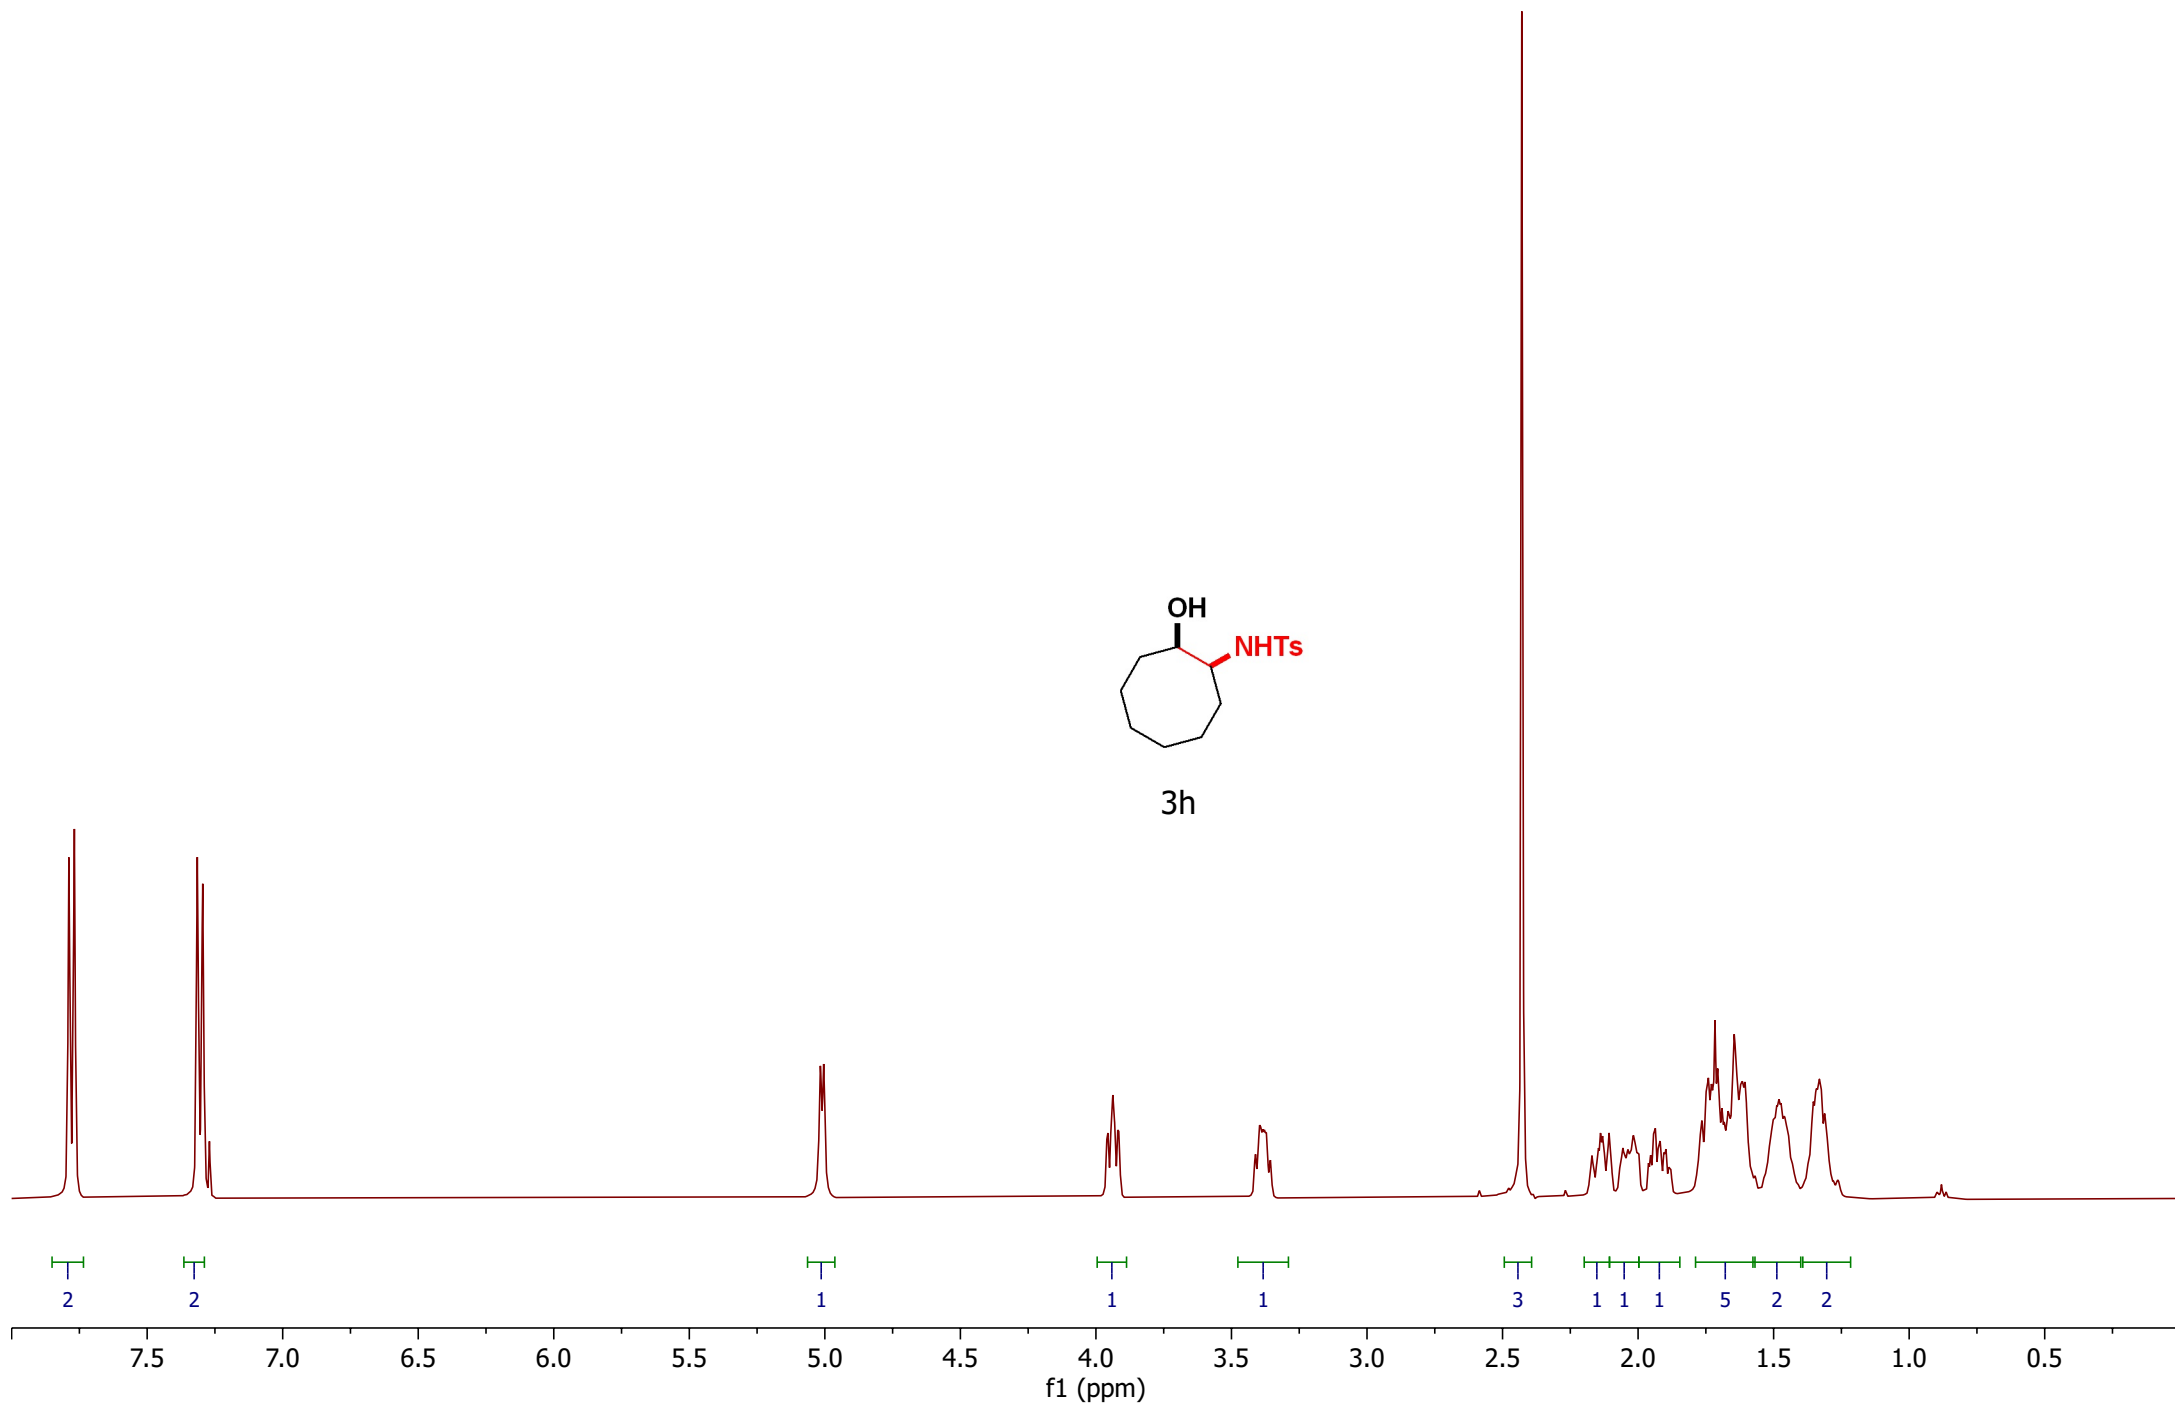

pdata/1  
ELD-73-P-TT16-CARBON

— 143.49 — 136.71 — 129.64 — 129.54 — 127.57 — 127.51 — 77.39 — 77.07 — 76.75 — 65.67 — 60.55 — 31.87 — 31.26 — 25.61 — 25.40 — 25.36 — 23.93 — 21.58

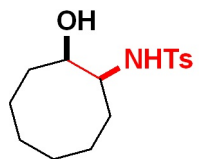

3h

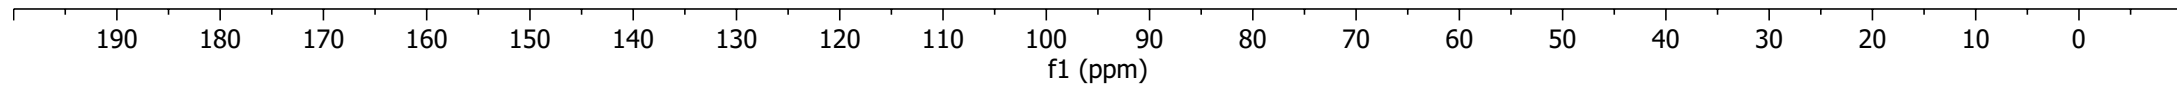

pdata/1  
RAM-11-48-11-19

5.36  
5.33  
5.03  
5.01  
5.00  
4.99  
4.46  
4.45  
4.44  
3.29  
3.28  
3.25  
3.24  
3.17  
3.13  
2.46

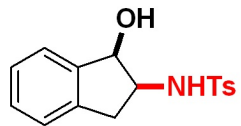

3i

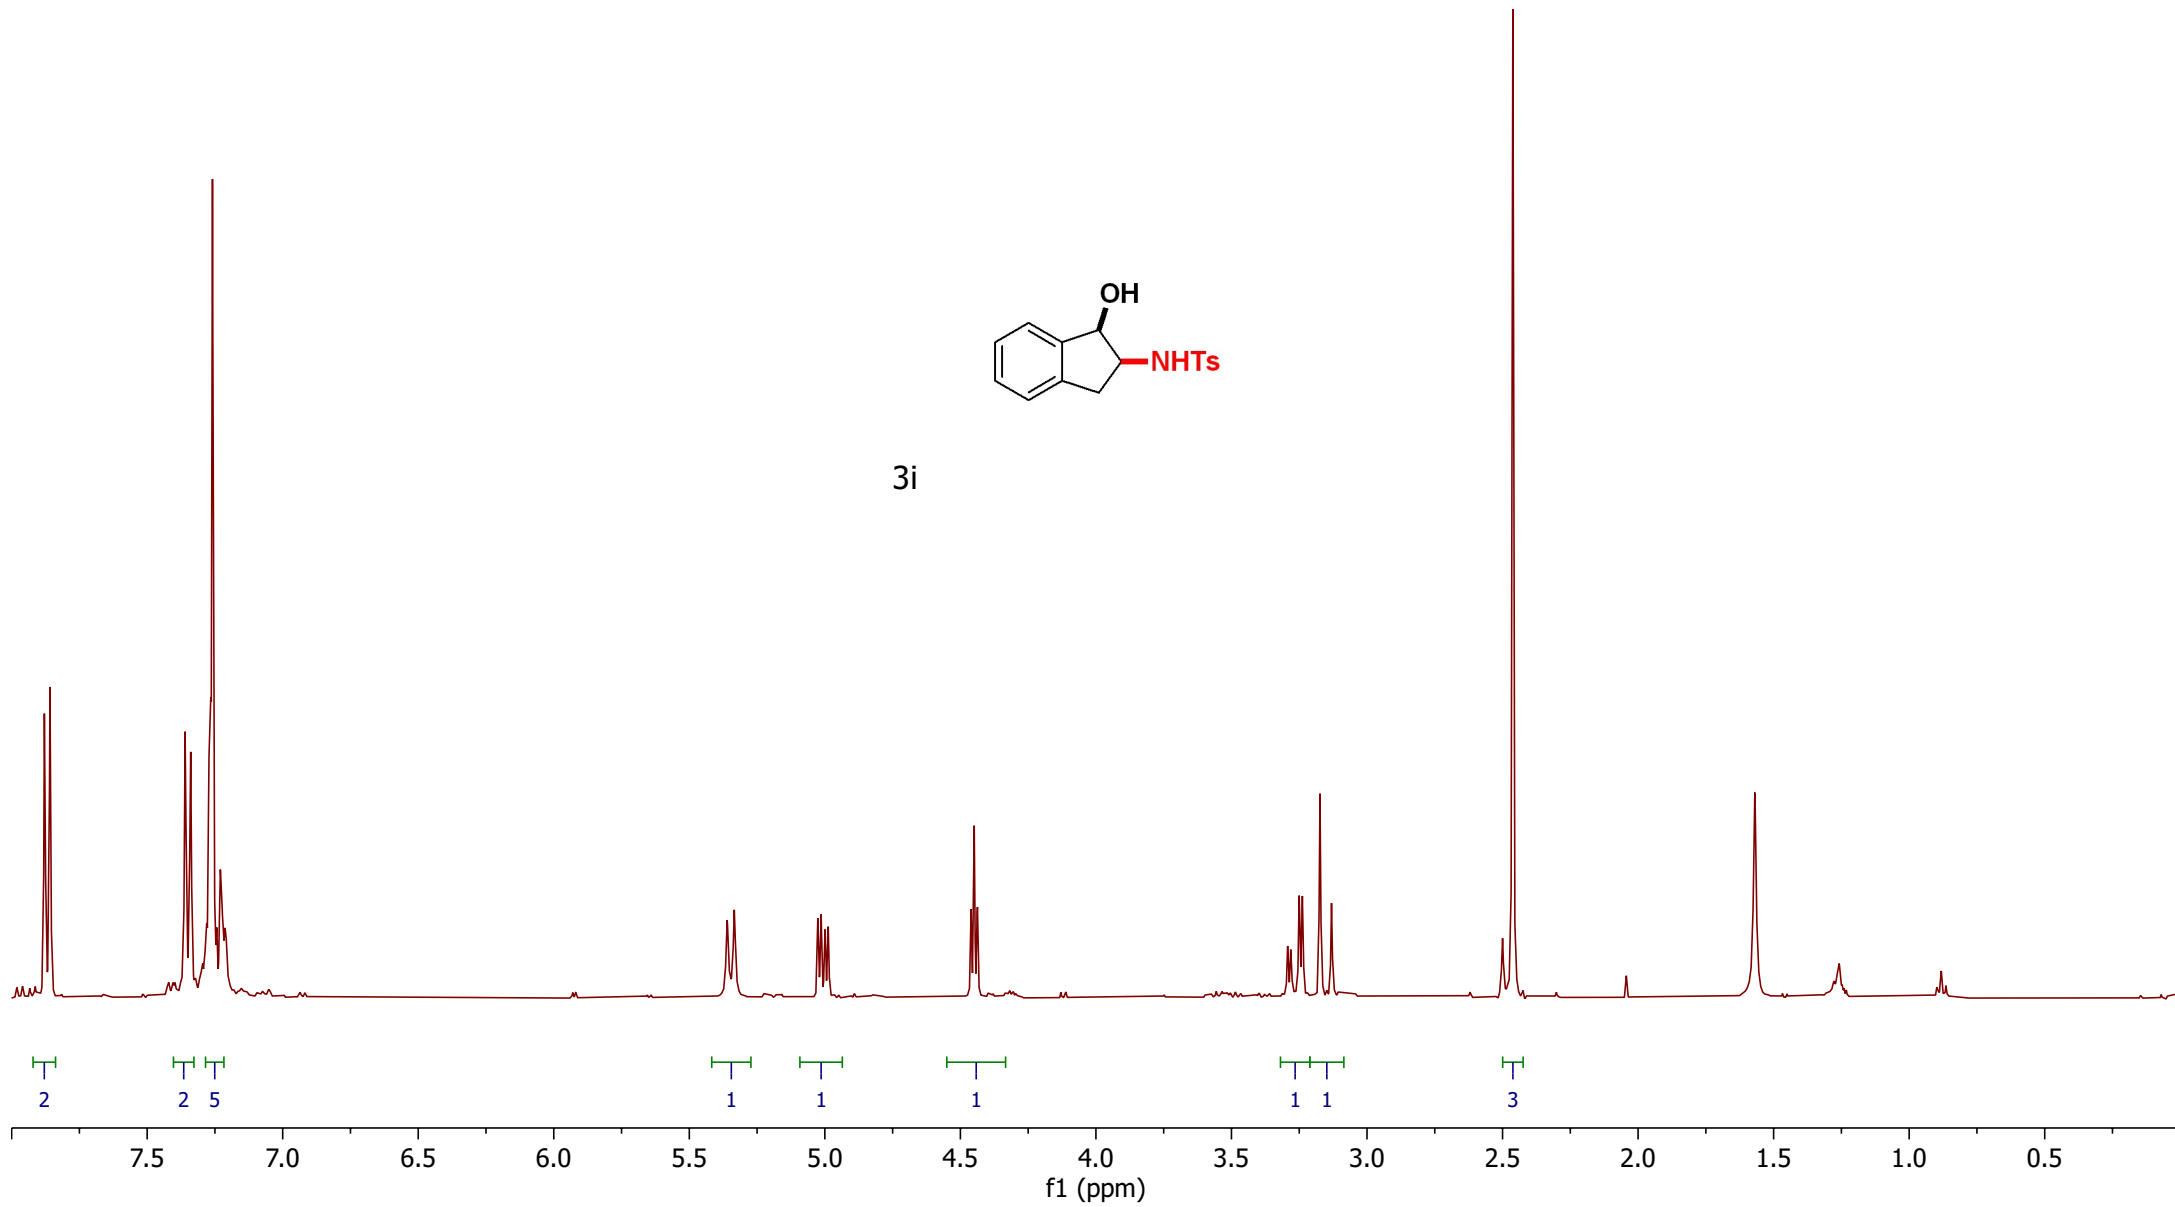

pdata/1  
RAM-48F-TT19 PROTON AND CARBON

143.93  
138.69  
137.95  
137.76  
129.86  
128.68  
127.58  
127.26  
125.20  
124.38

77.34  
77.22  
77.17  
77.02  
76.70

65.29  
61.37

40.64

21.63

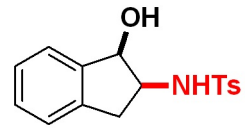

3i

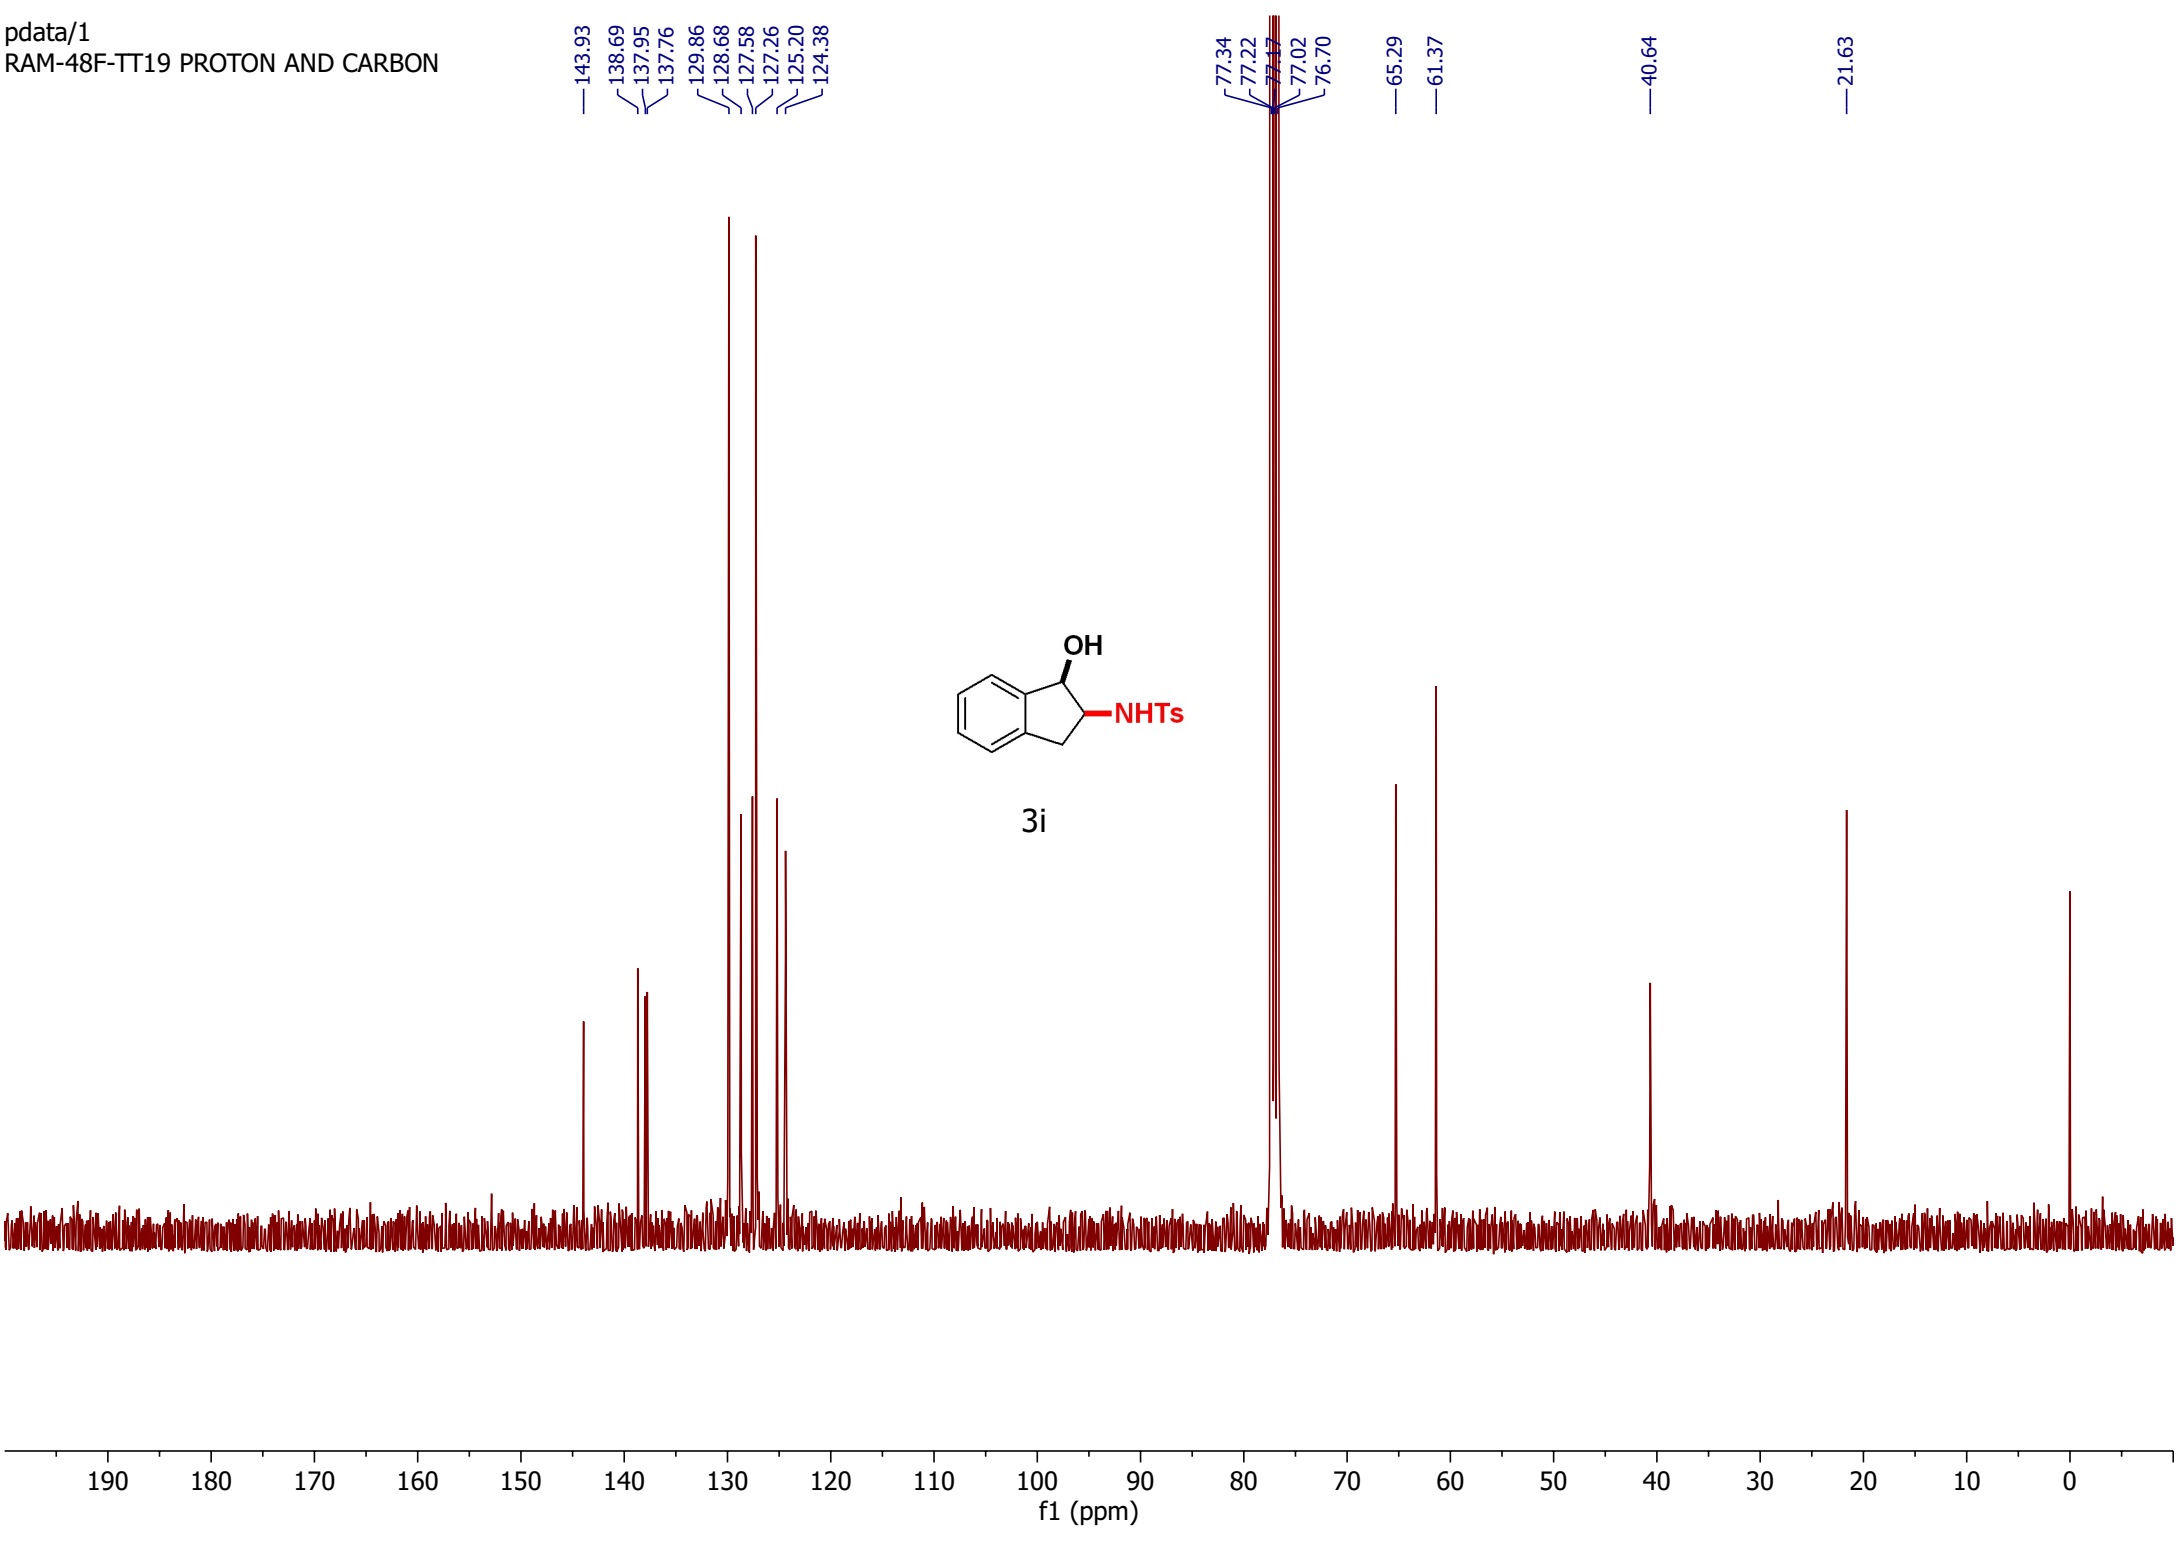



pdata/t

7.66  
7.64  
7.26  
7.25  
7.24  
7.23  
7.23  
7.22  
7.21  
7.20  
7.19

5.03  
4.74  
4.73  
4.72  
4.71

3.18  
3.16  
3.15  
2.97  
2.95  
2.94  
2.92

2.36  
2.35

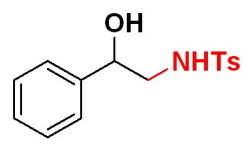

3j

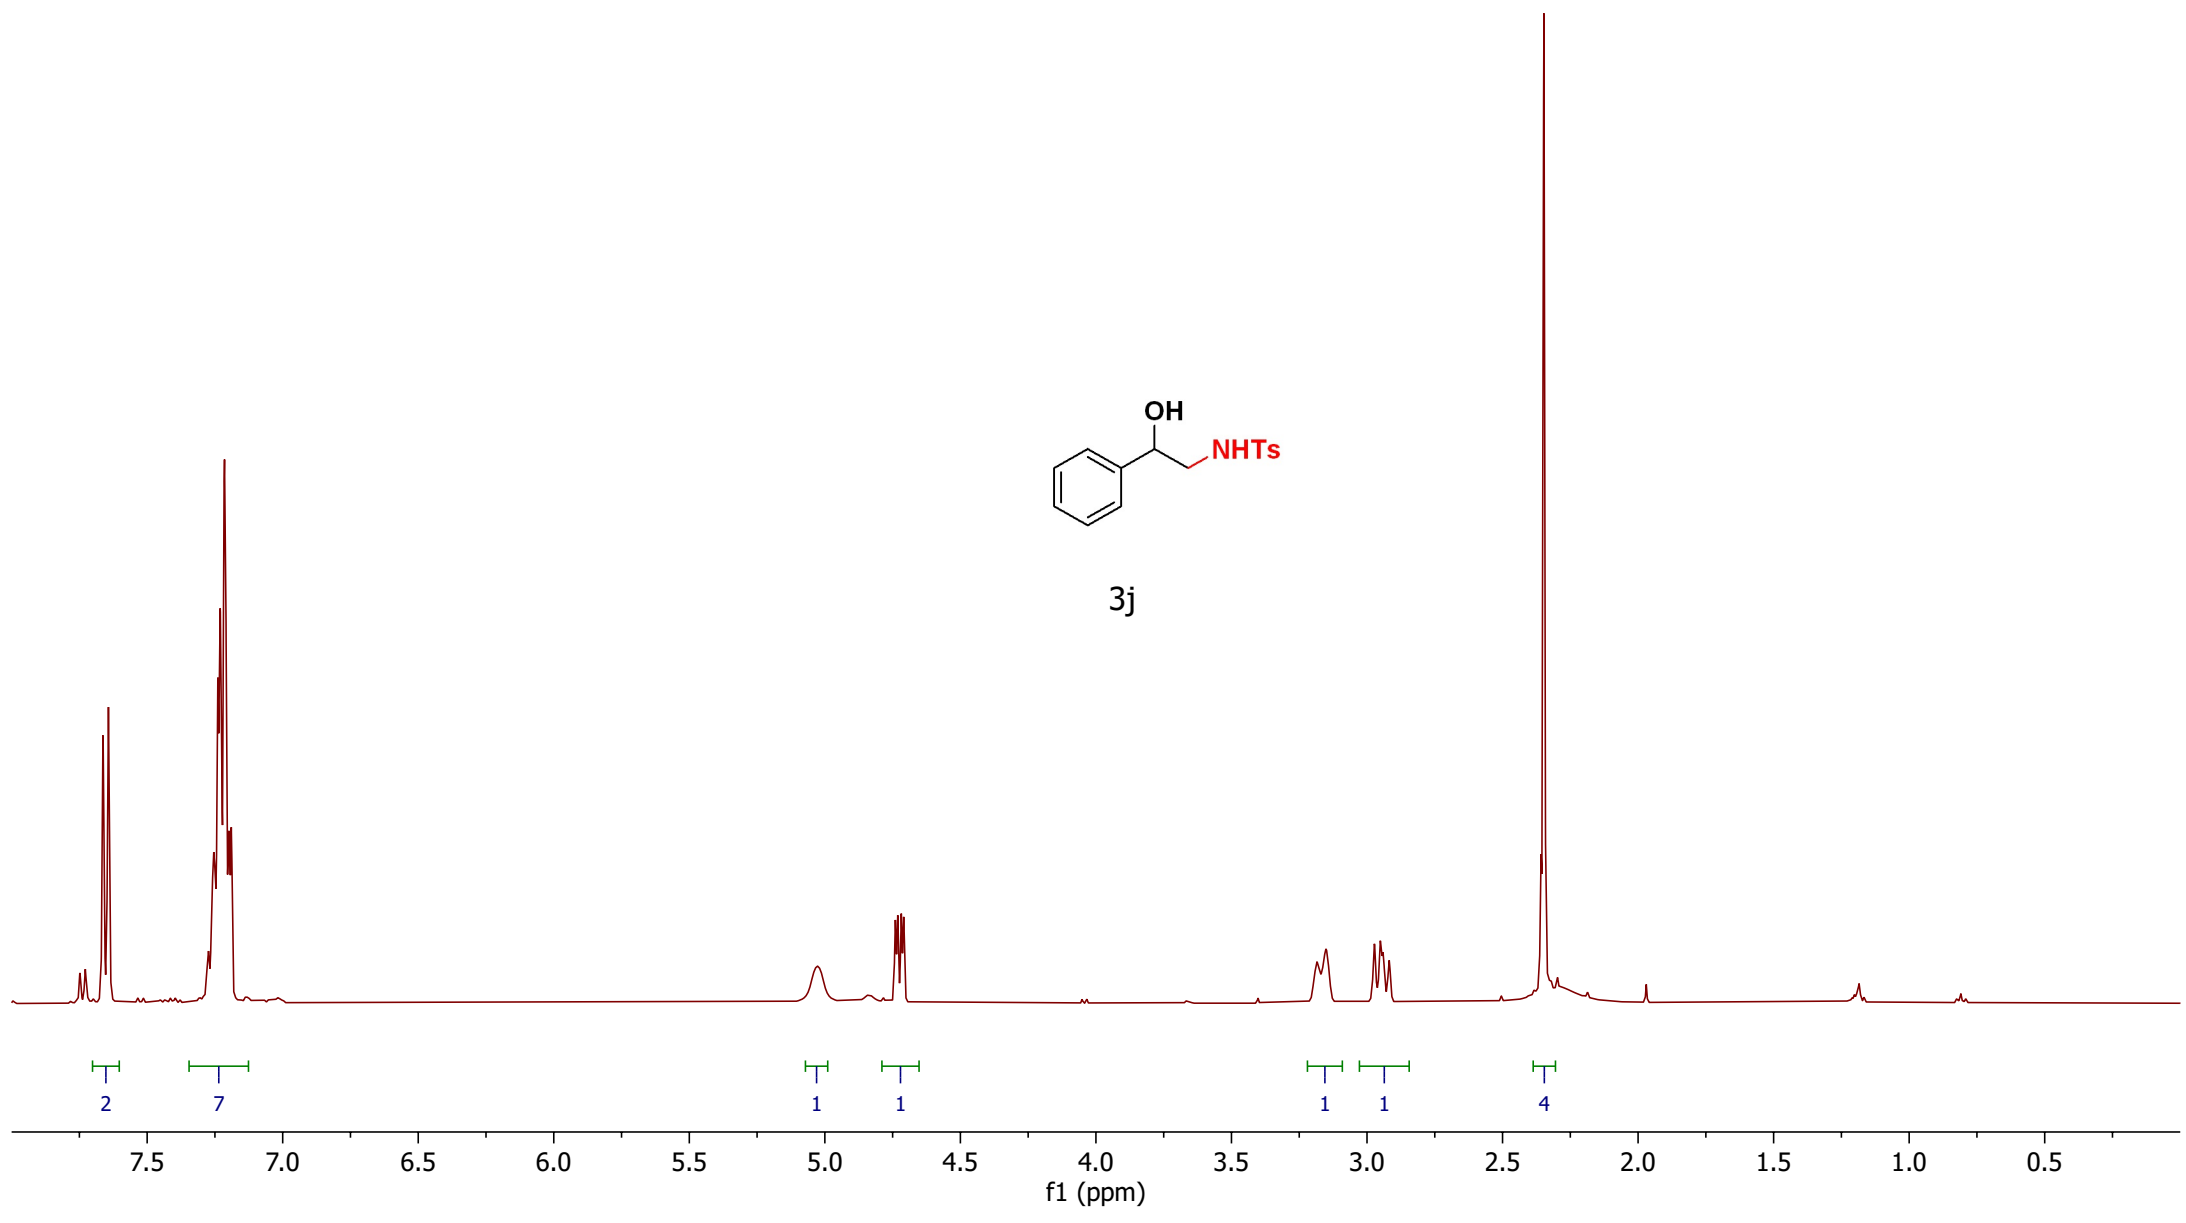

143.67  
143.66  
140.78  
136.64  
129.85  
129.82  
128.71  
128.70  
128.31  
128.28  
127.12  
127.11  
125.87  
125.85

72.80

50.22

21.56

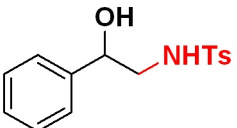

3j

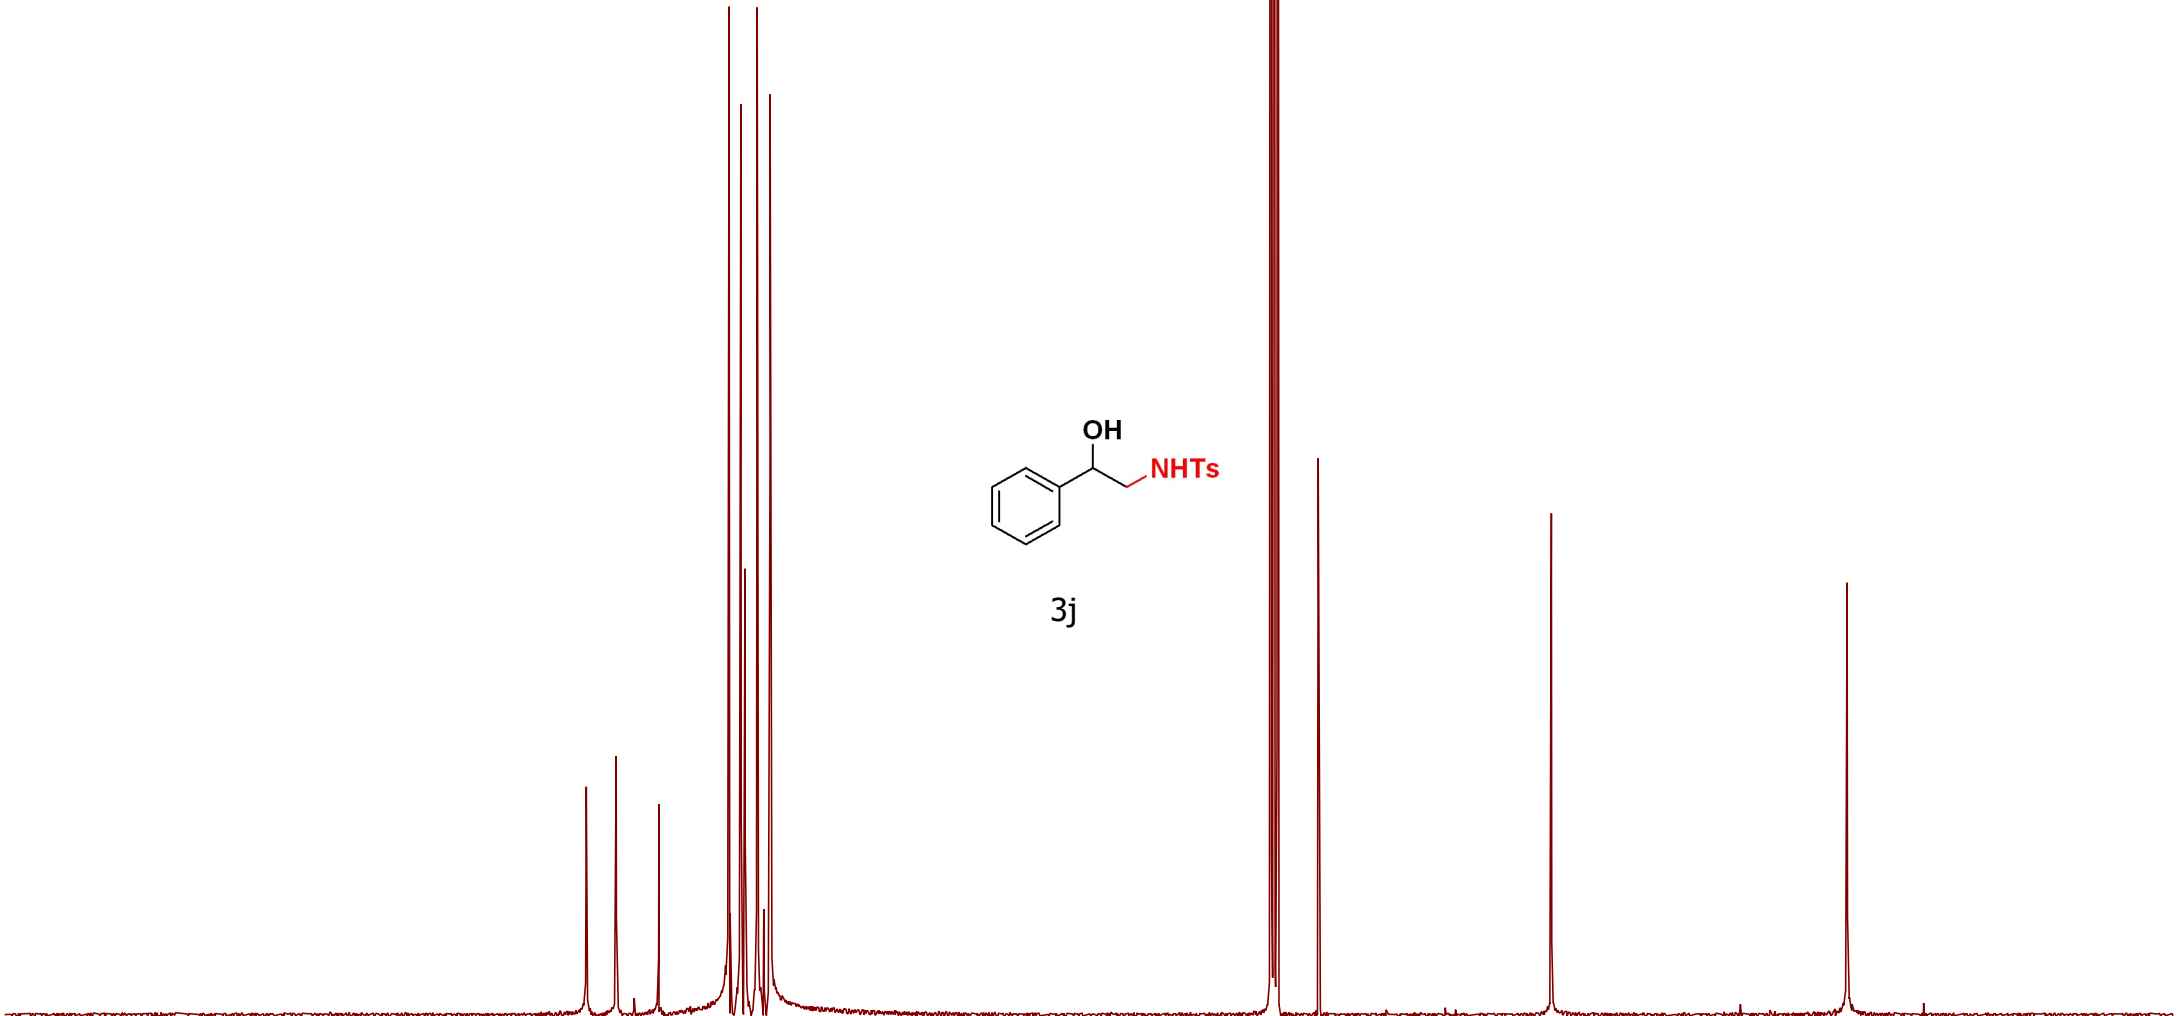

190 180 170 160 150 140 130 120 110 100 90 80 70 60 50 40 30 20 10 0

f1 (ppm)

pdata/1

7.65  
7.63

7.22  
7.20

7.08  
7.06

5.02  
5.01  
5.00  
4.99  
4.69  
4.69  
4.67  
4.66

3.17  
3.16  
3.15  
3.14  
3.14  
3.13  
3.12  
3.11  
2.96  
2.95  
2.94  
2.93  
2.92  
2.91  
2.90  
2.36  
2.35  
2.25

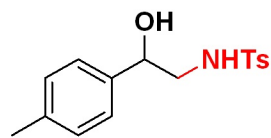

3k

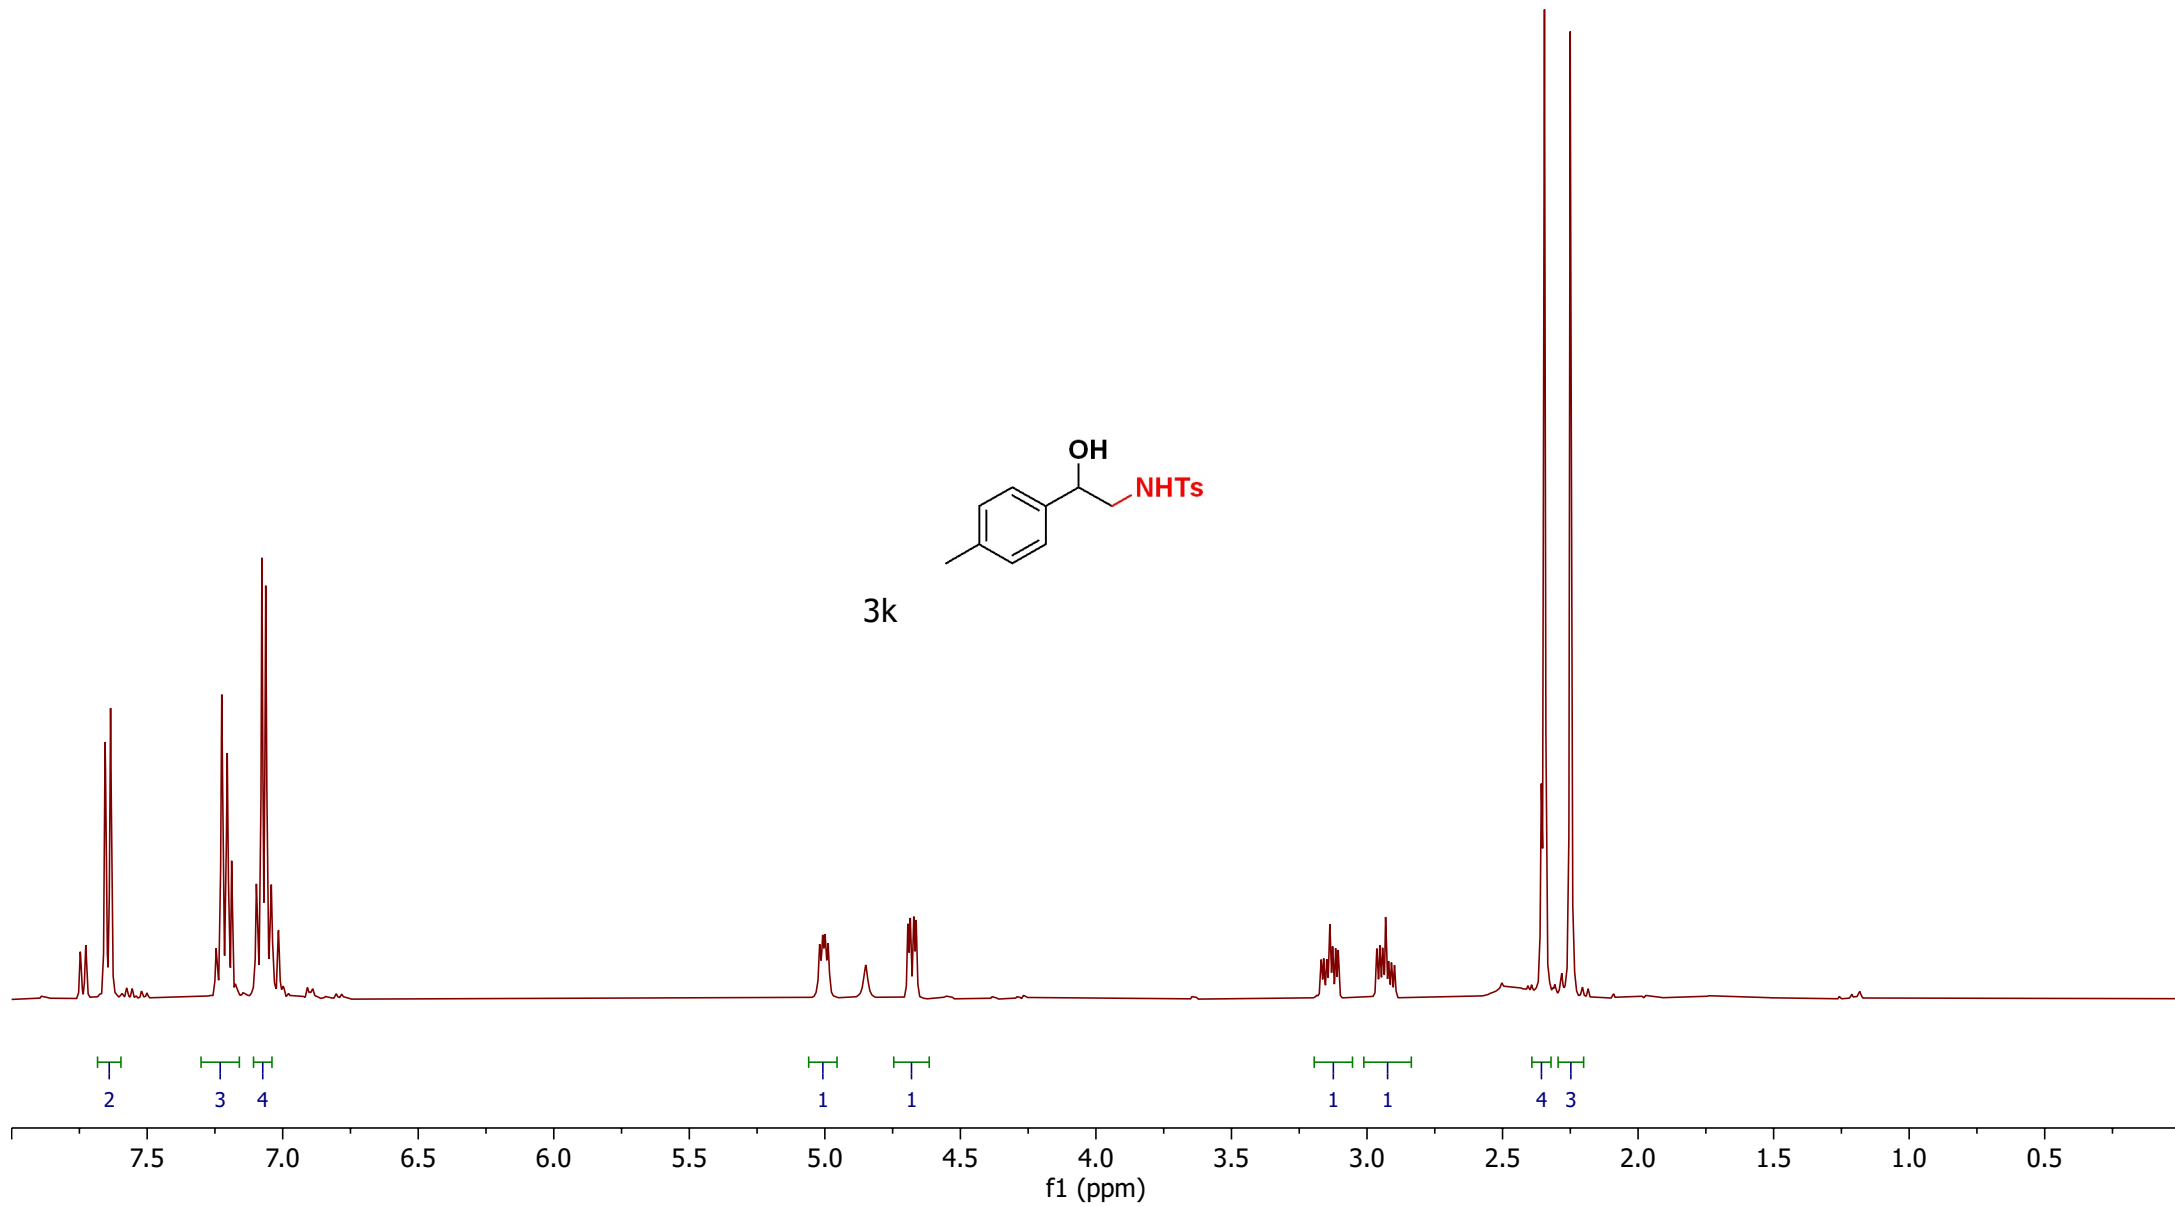

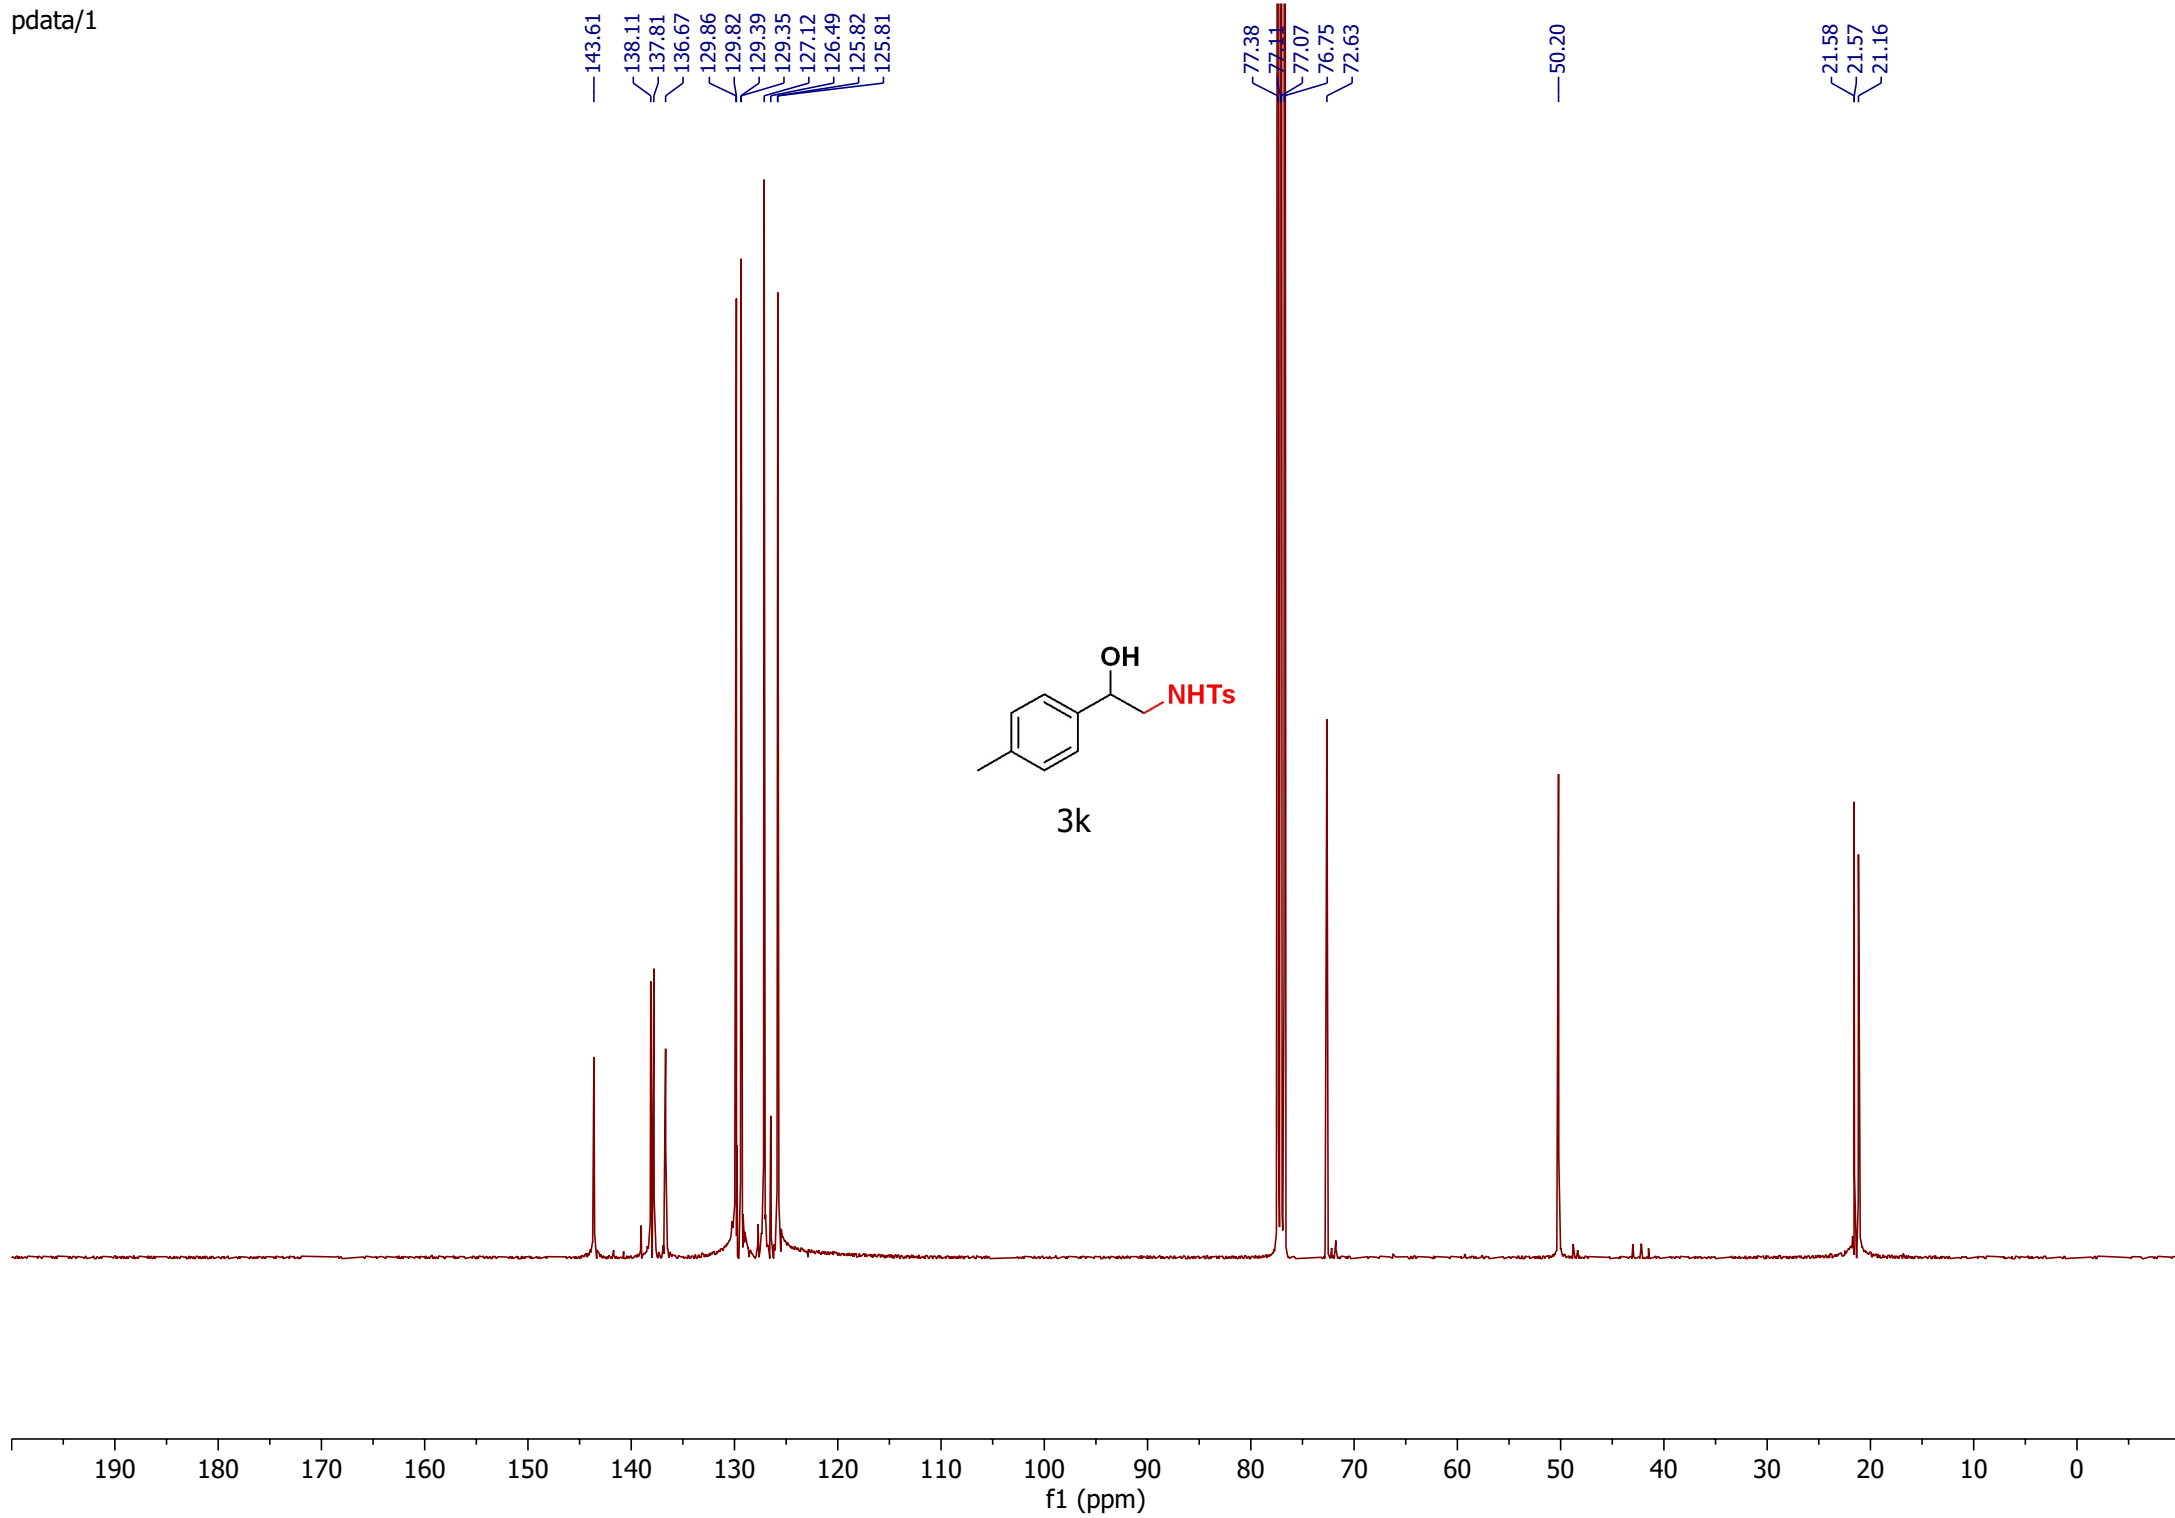

pdata/1  
7.64  
7.62  
7.20  
7.18  
7.10  
7.08  
7.00  
6.99  
6.98  
6.96

5.38  
5.36  
5.36  
5.34

4.68  
4.67  
4.66  
4.65

3.15  
3.14  
3.13  
3.12  
3.11  
3.11  
3.09  
3.09  
2.95  
2.93  
2.92  
2.91  
2.90  
2.89  
2.88  
2.32  
2.22

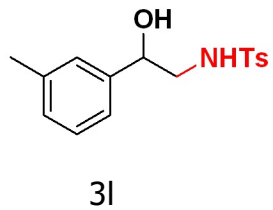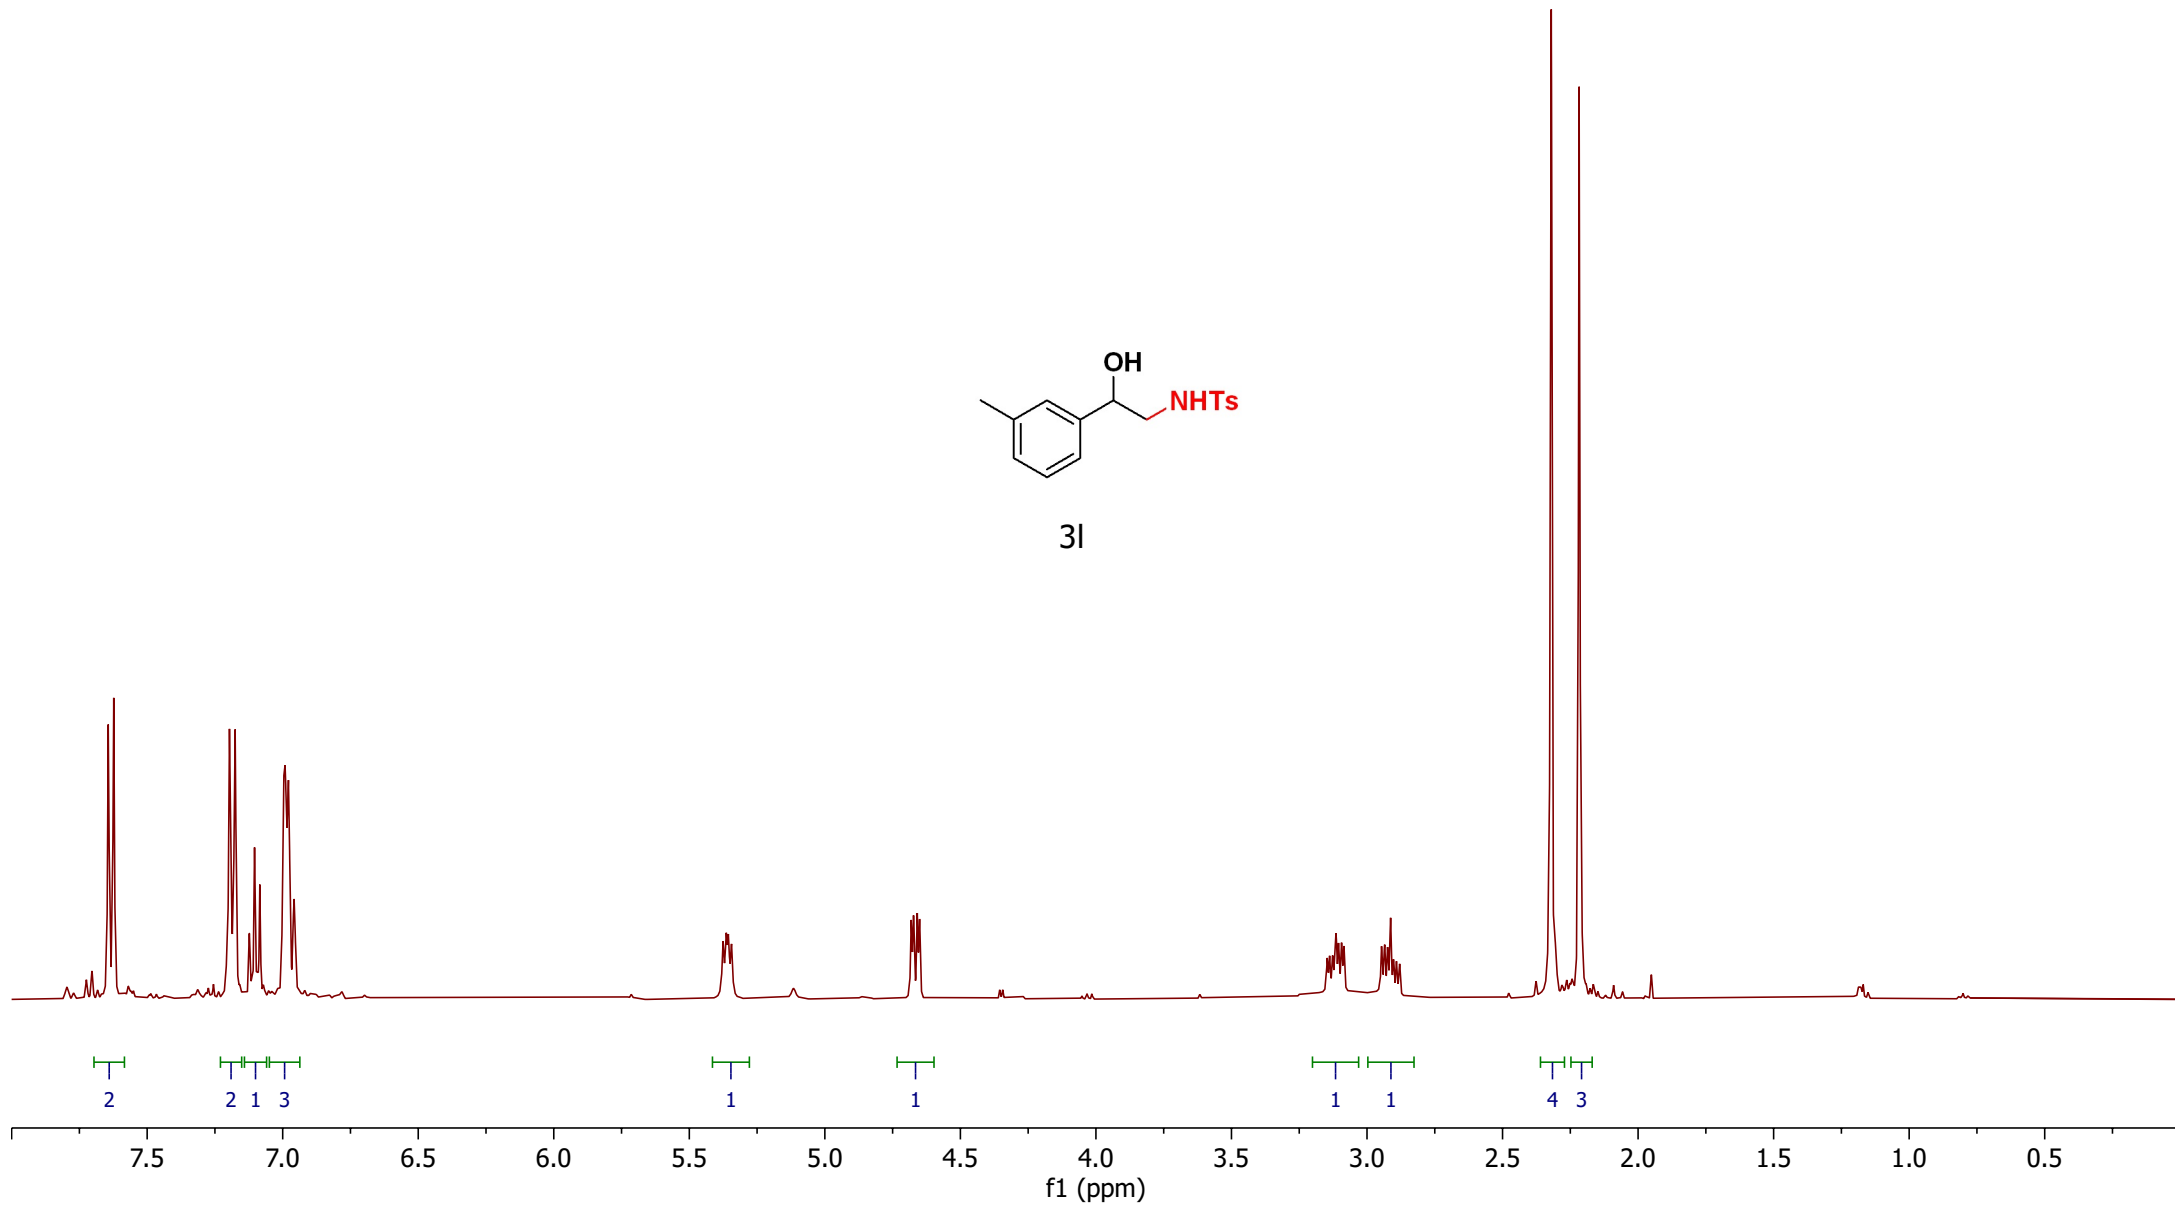

143.58  
140.81  
138.34  
136.65  
129.82  
128.91  
128.53  
127.12  
126.57  
122.94

77.44  
77.12  
76.81  
72.81

50.32

21.57  
21.43

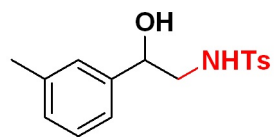

3I

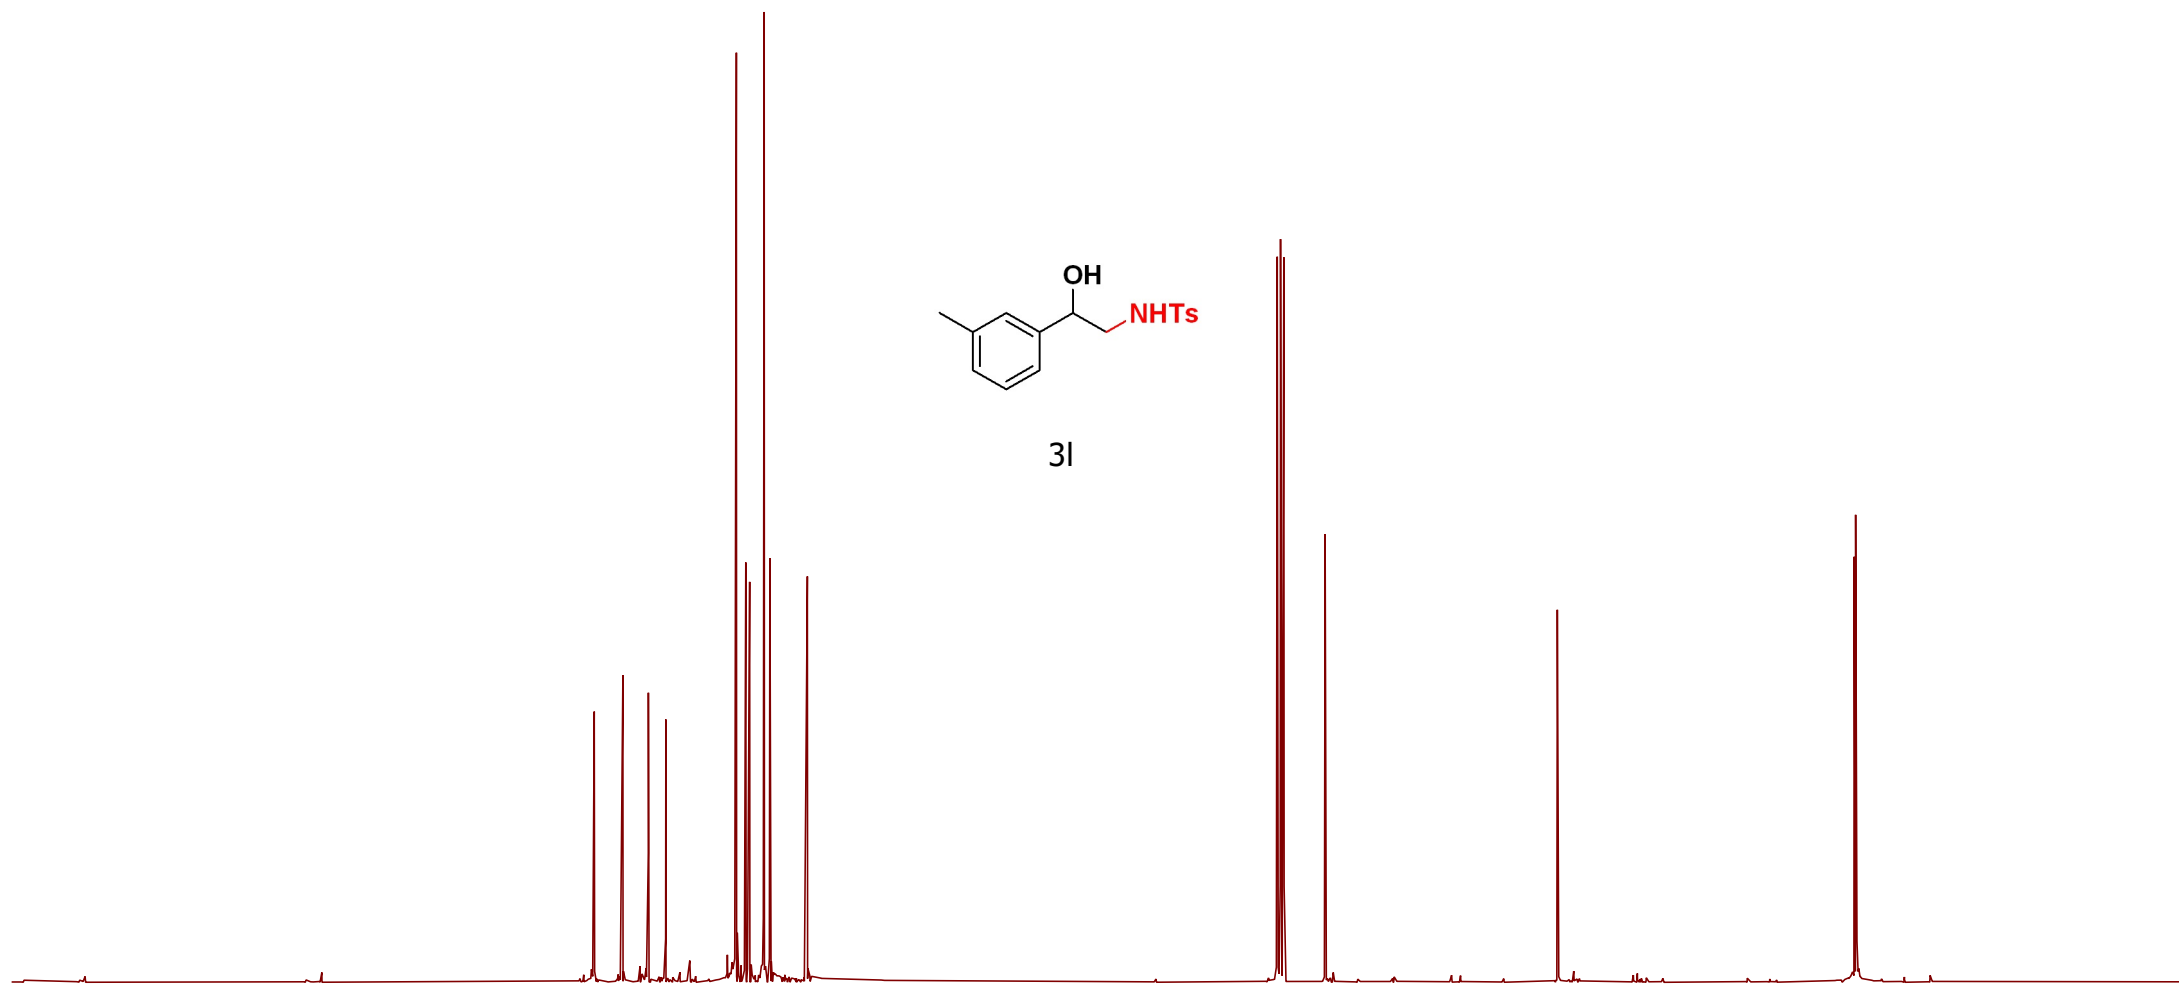

190 180 170 160 150 140 130 120 110 100 90 80 70 60 50 40 30 20 10 0

f1 (ppm)

pdata/s

7.64  
7.64  
7.64  
7.32  
7.31  
7.30  
7.30  
7.29  
7.21  
7.20  
7.18  
7.18  
7.09  
7.08  
7.08  
7.07  
7.06  
7.01  
7.00  
6.99

5.52  
5.51  
5.50  
5.49

4.95  
4.94  
4.93  
4.92

3.11  
3.09  
3.08  
3.07  
3.06  
3.05  
2.87  
2.86  
2.84  
2.83

2.33  
2.32  
2.15

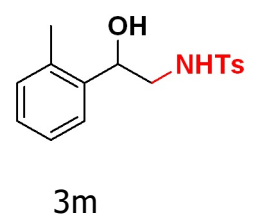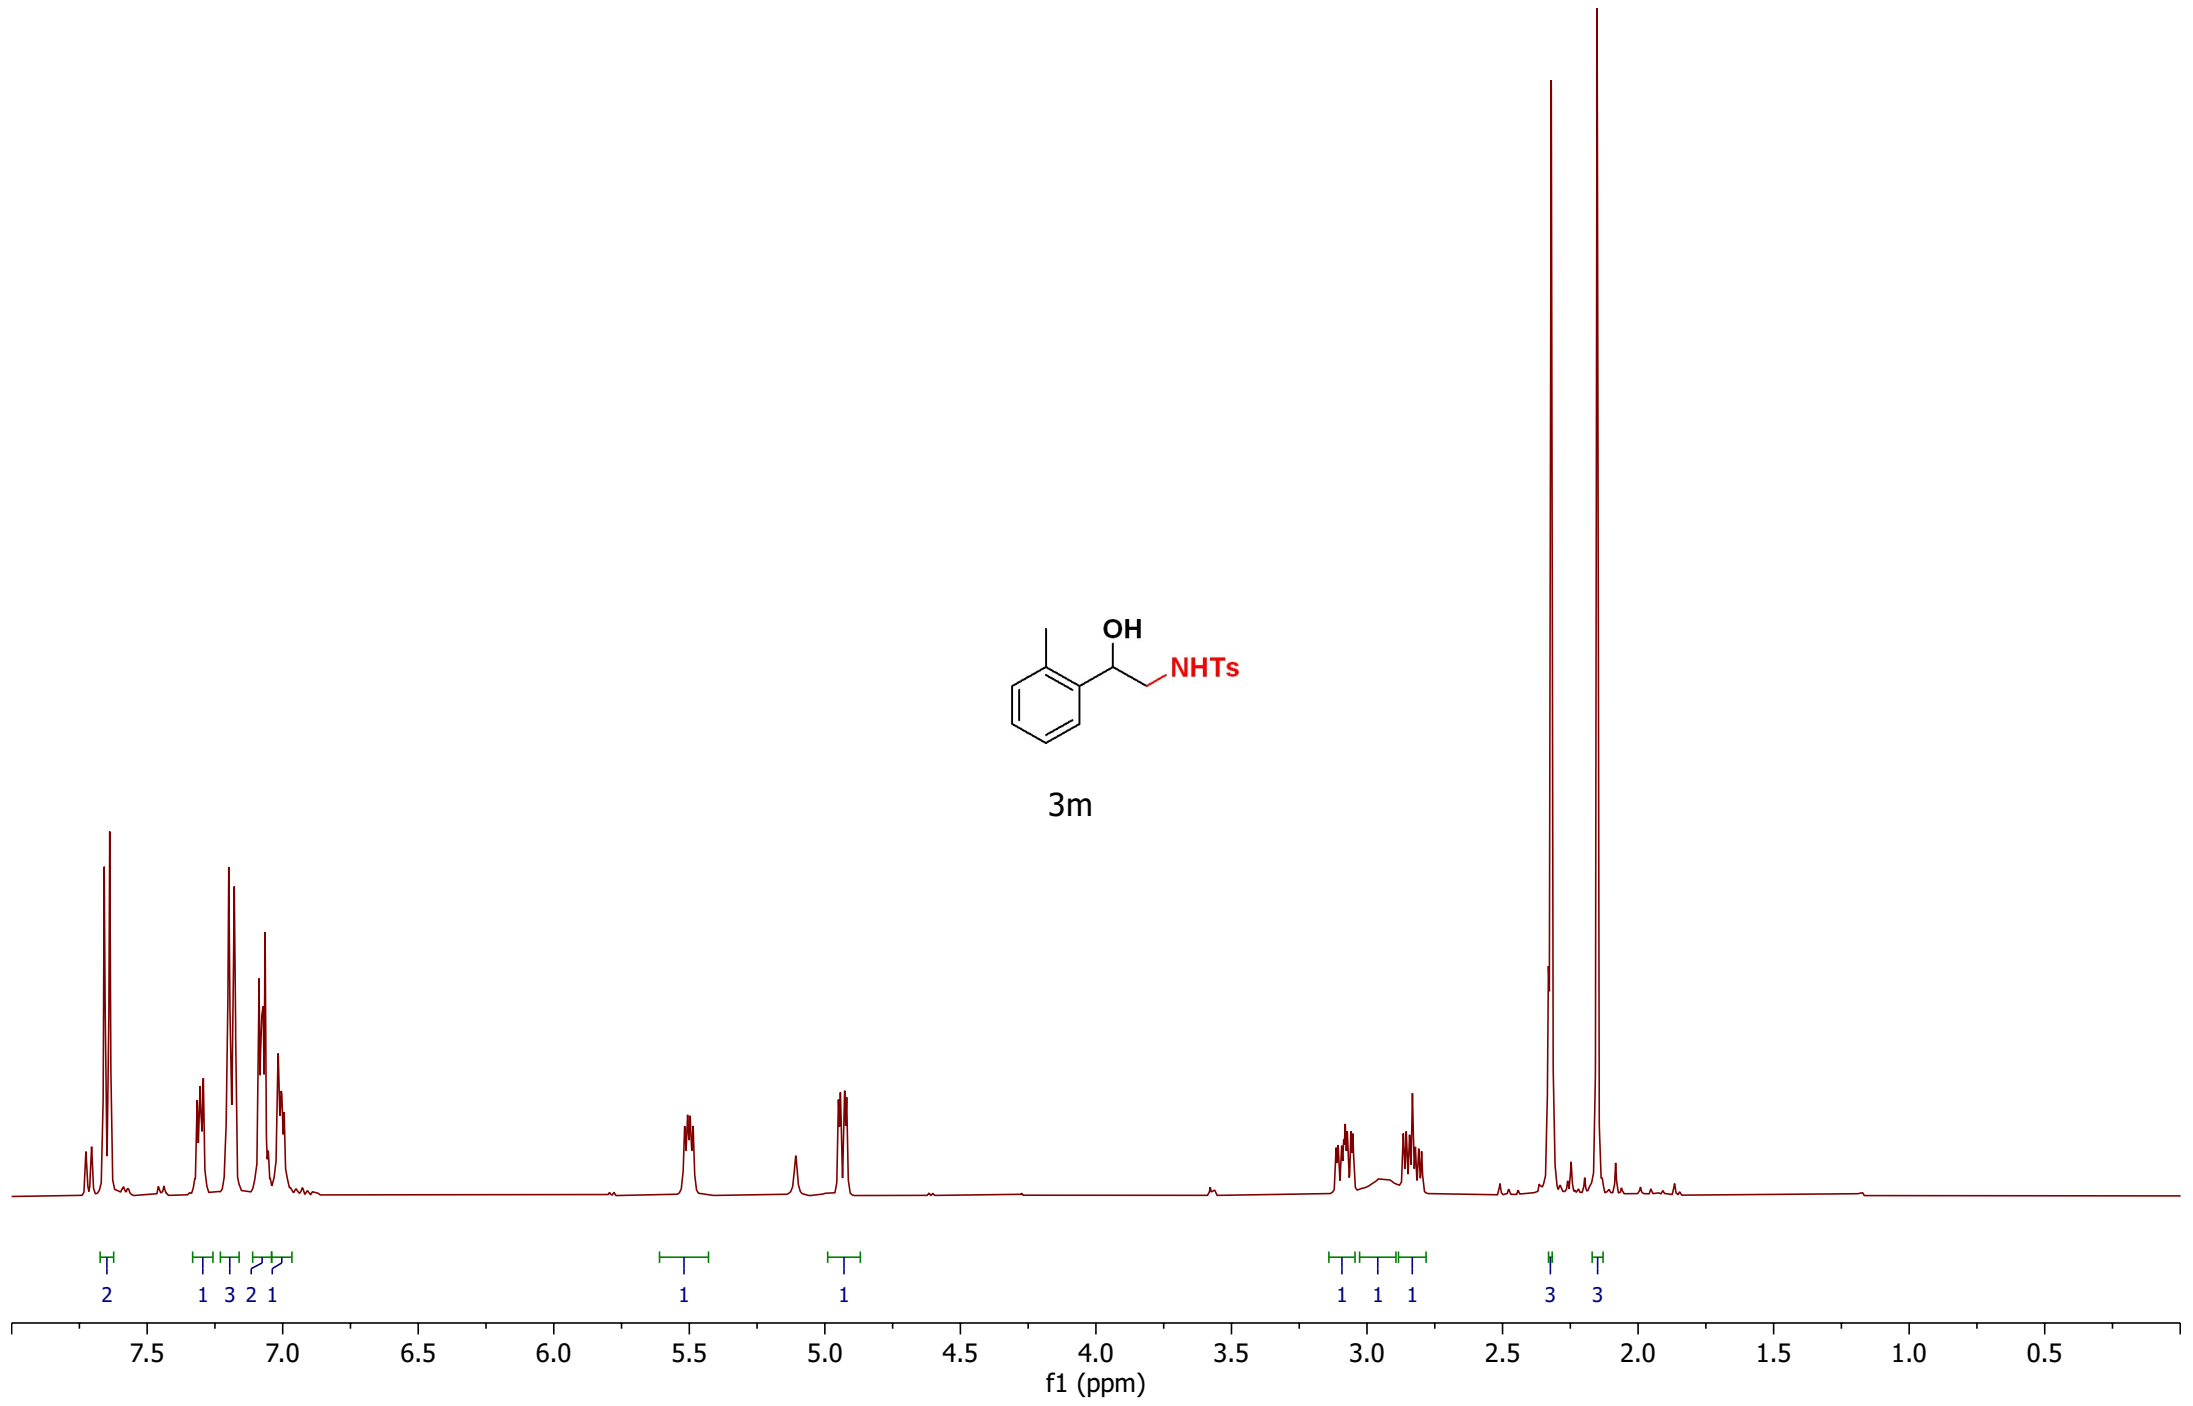

143.62  
138.98  
136.75  
136.75  
134.60  
130.49  
129.82  
127.87  
127.13  
126.44  
126.37  
125.35

77.43  
77.12  
76.80  
69.64

49.16

21.57  
18.94

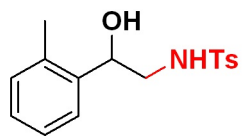

3m

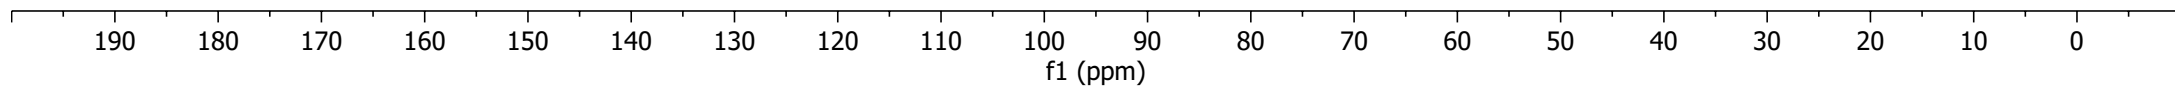



pdata/

5.13  
5.12  
5.12  
5.11  
5.11  
5.10  
5.10  
5.09  
4.70  
4.69  
4.68  
4.67

3.18  
3.17  
3.16  
3.14  
3.13  
3.12  
3.11  
2.98  
2.96  
2.95  
2.94  
2.93  
2.92  
2.91  
2.94

1.22

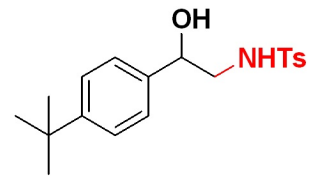

3n

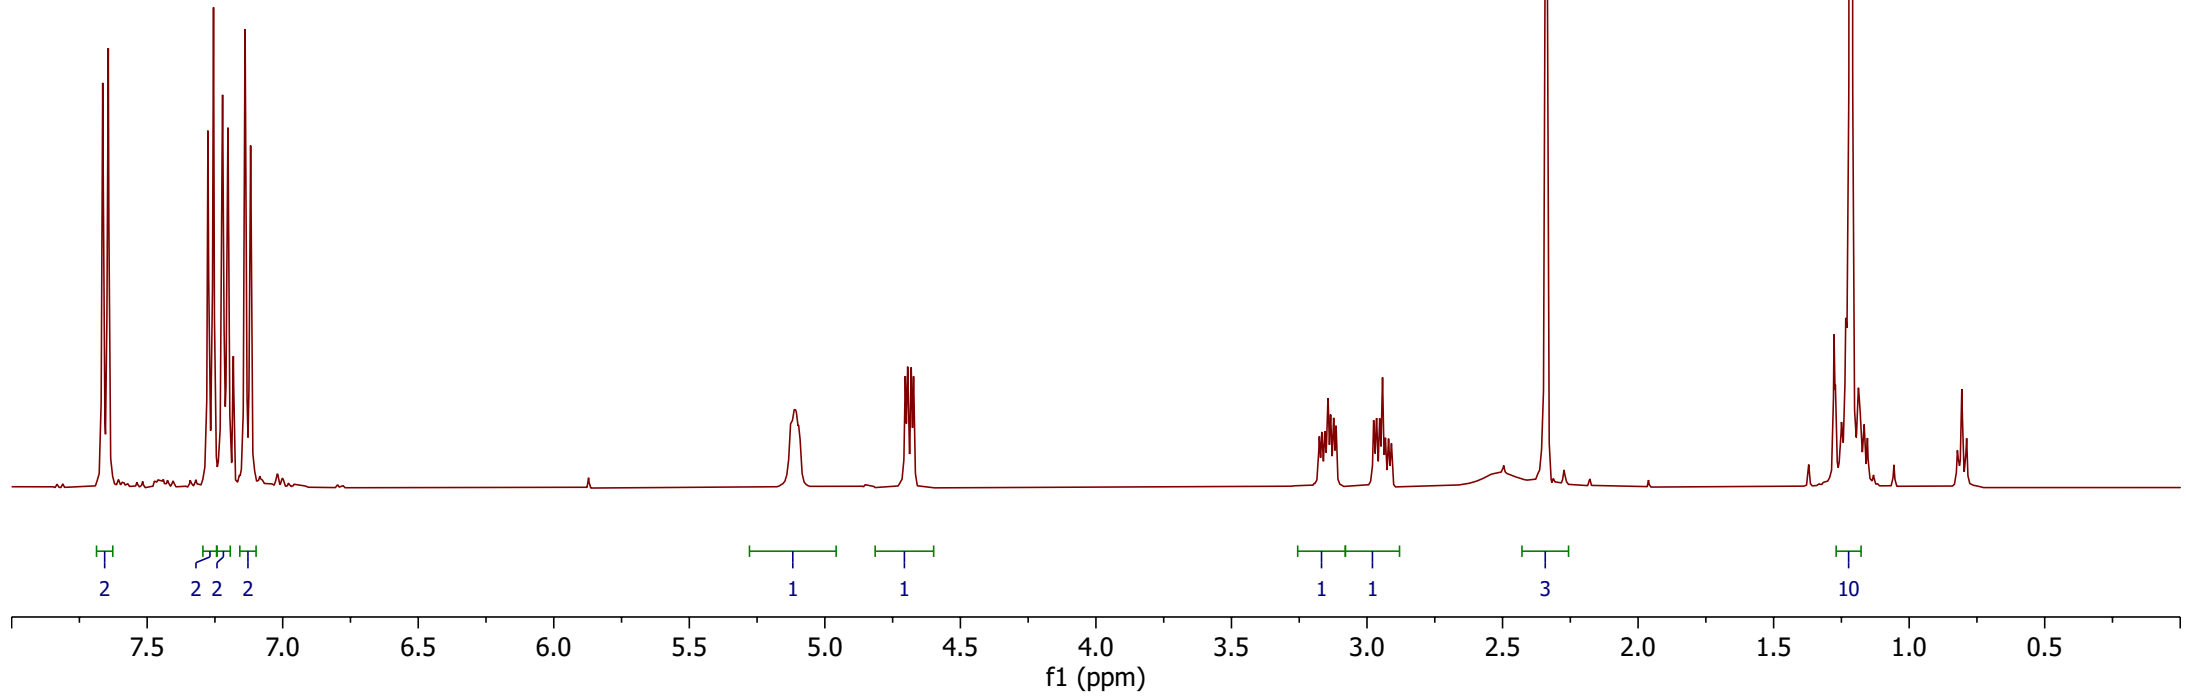

— 151.33  
— 143.60  
— 137.80  
— 136.68  
— 129.82  
— 127.20  
— 127.16  
— 125.70  
— 125.65  
— 125.61

— 72.60

— 50.15

— 34.59

— 31.32

— 31.30

— 21.58

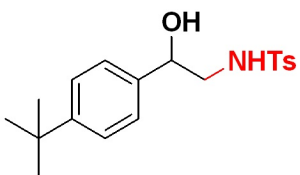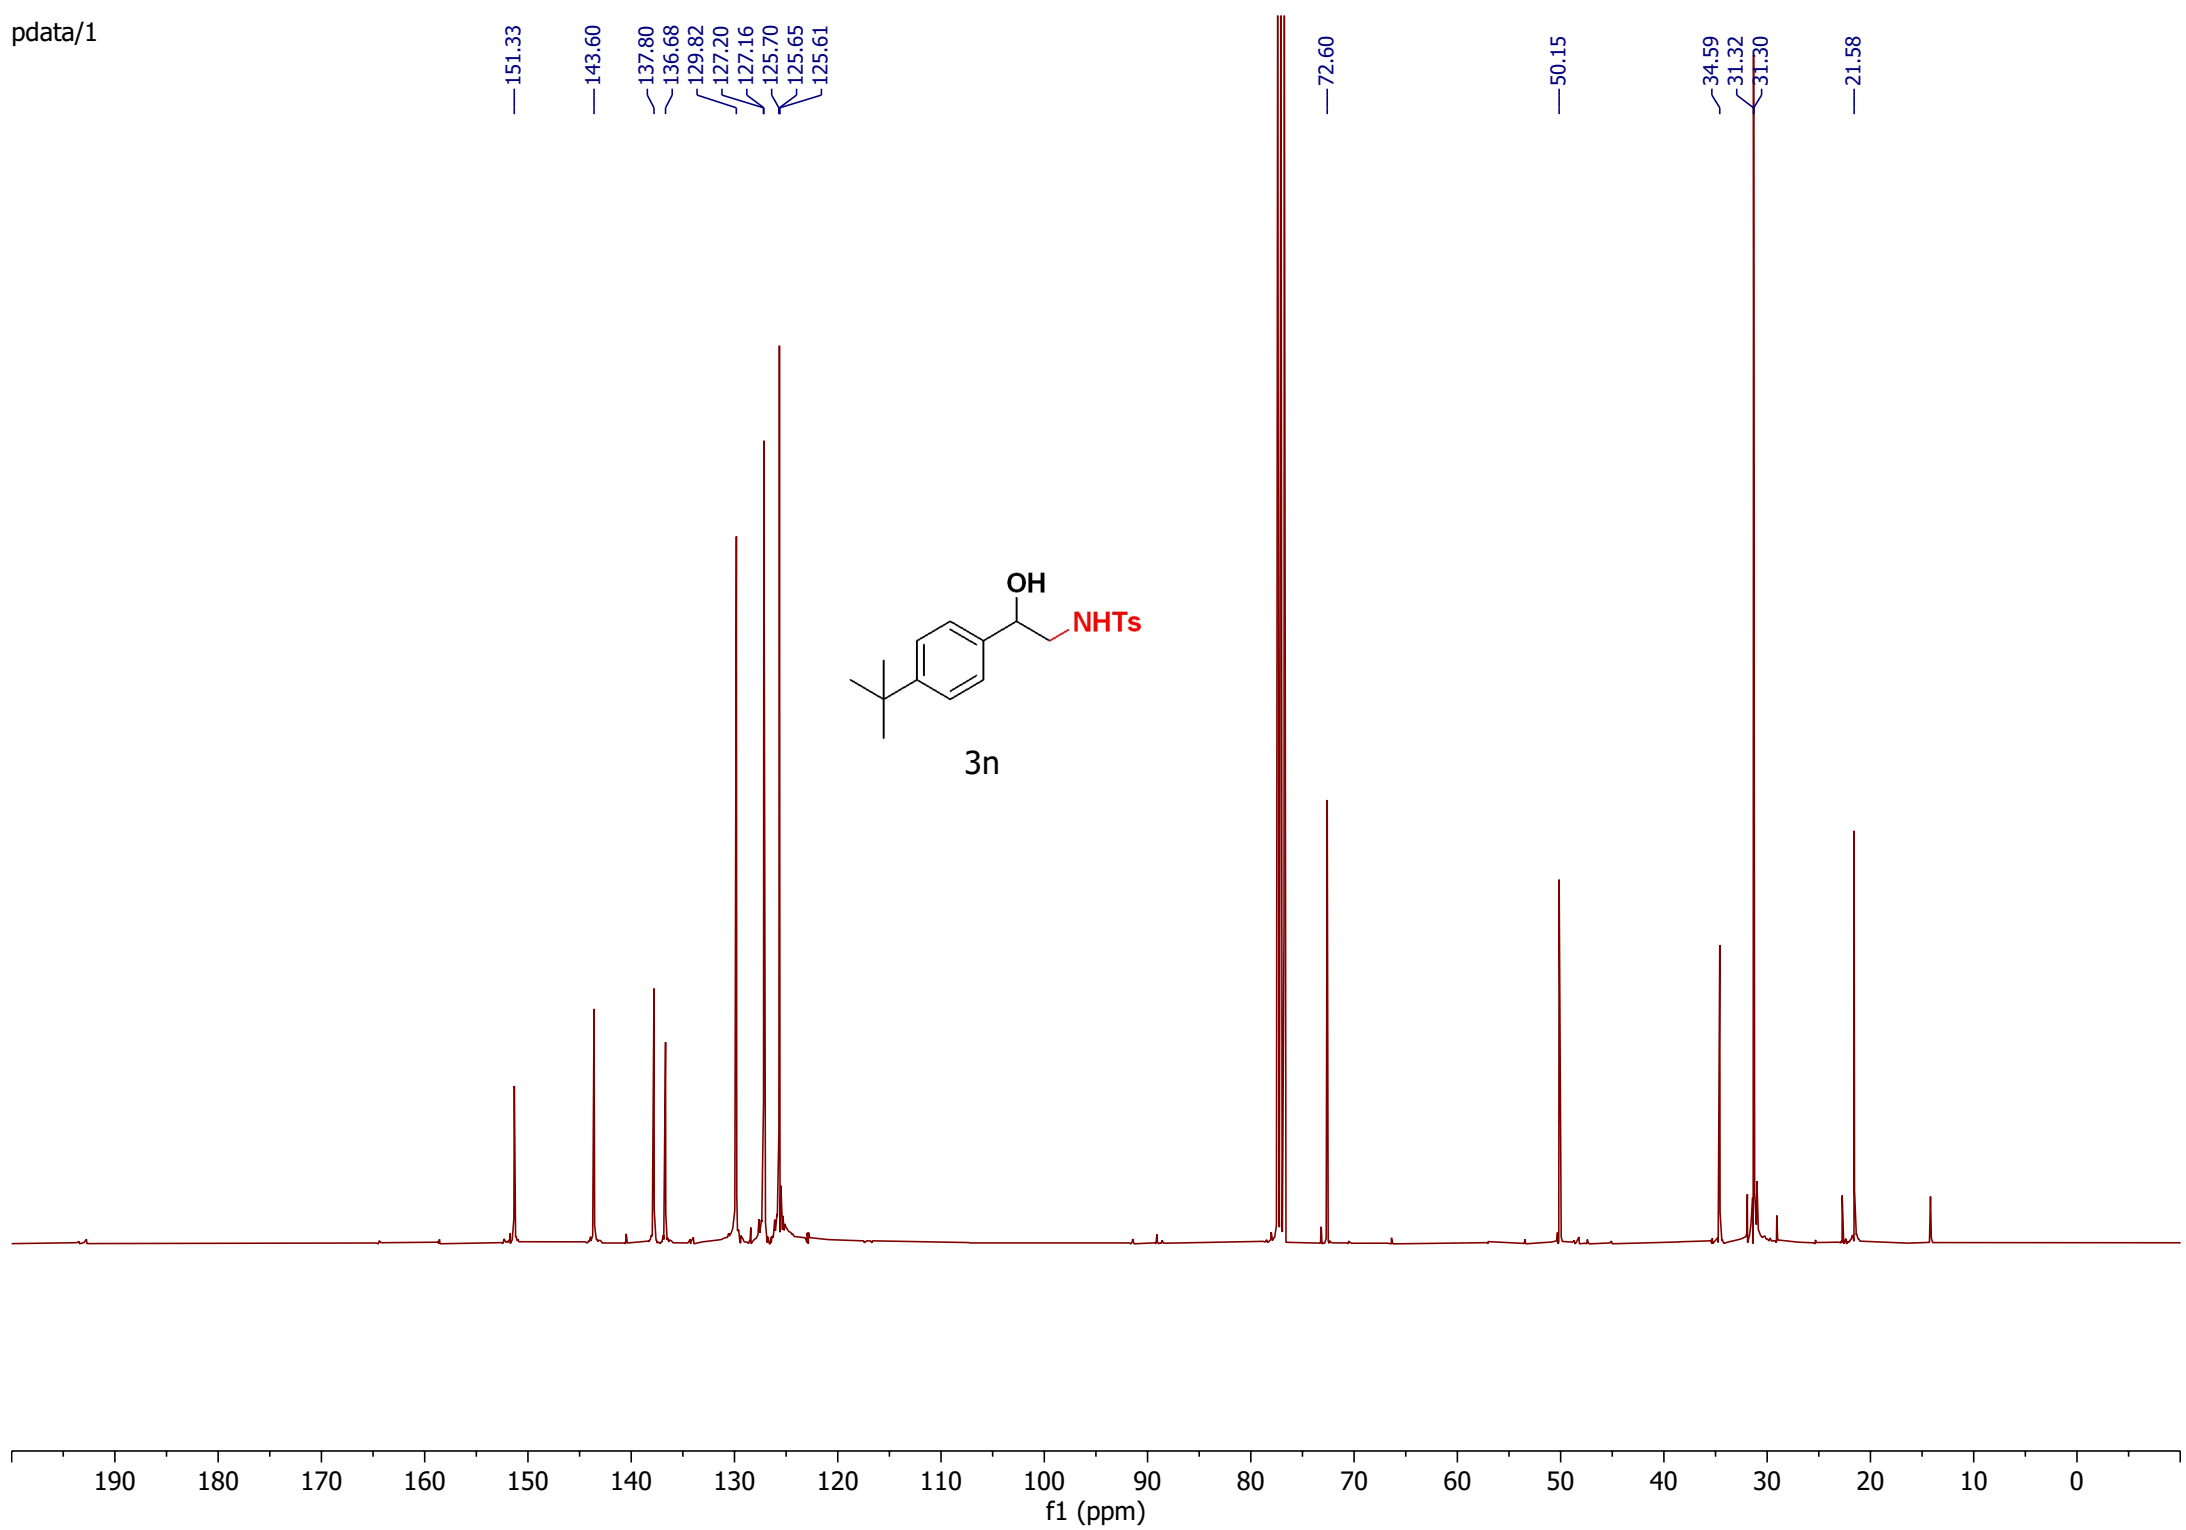

pdata/1  
AAP-III-8219-1

7.636  
7.515  
7.403  
7.521  
7.1659  
7.1461

6.6868

5.2106  
5.2038  
5.1911  
5.1773  
4.9077  
4.8963  
4.8887  
4.8765

3.9496  
3.9450  
3.9292  
3.9221  
3.9002  
3.8955  
3.7541  
3.7499  
3.7360  
3.7257  
3.7079  
3.7034

2.3805  
2.2189  
2.1992

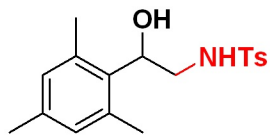

3o

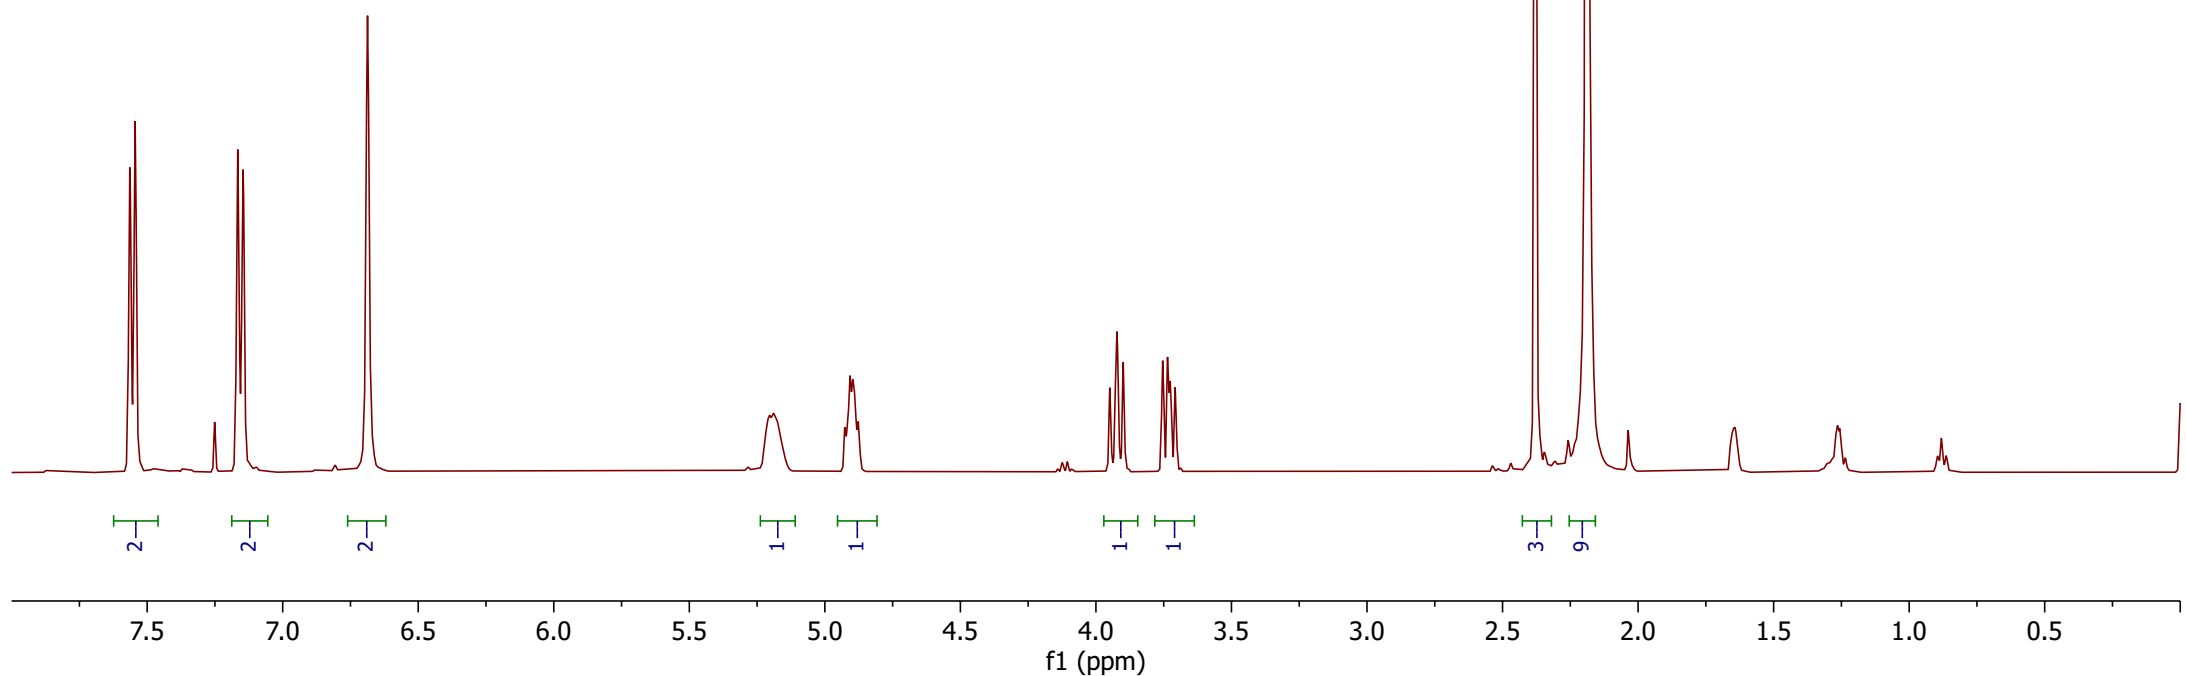

pdata/1  
AAP-III-82E-t19-C13

143.4969  
137.9223  
136.4050  
129.9015  
129.3436  
127.2710  
77.3733  
77.0555  
76.7378  
55.2474  
44.9555  
21.5054  
20.7171  
20.6910

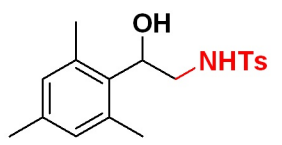

30

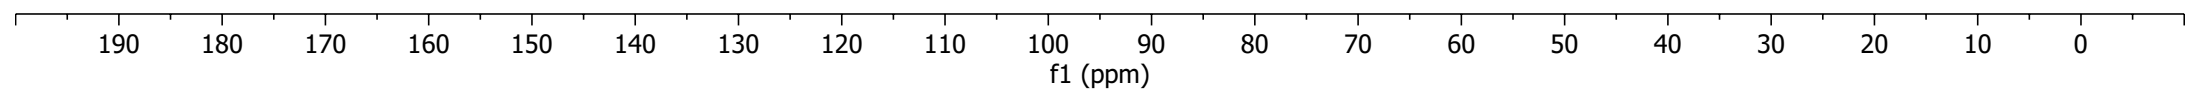

pdata/1

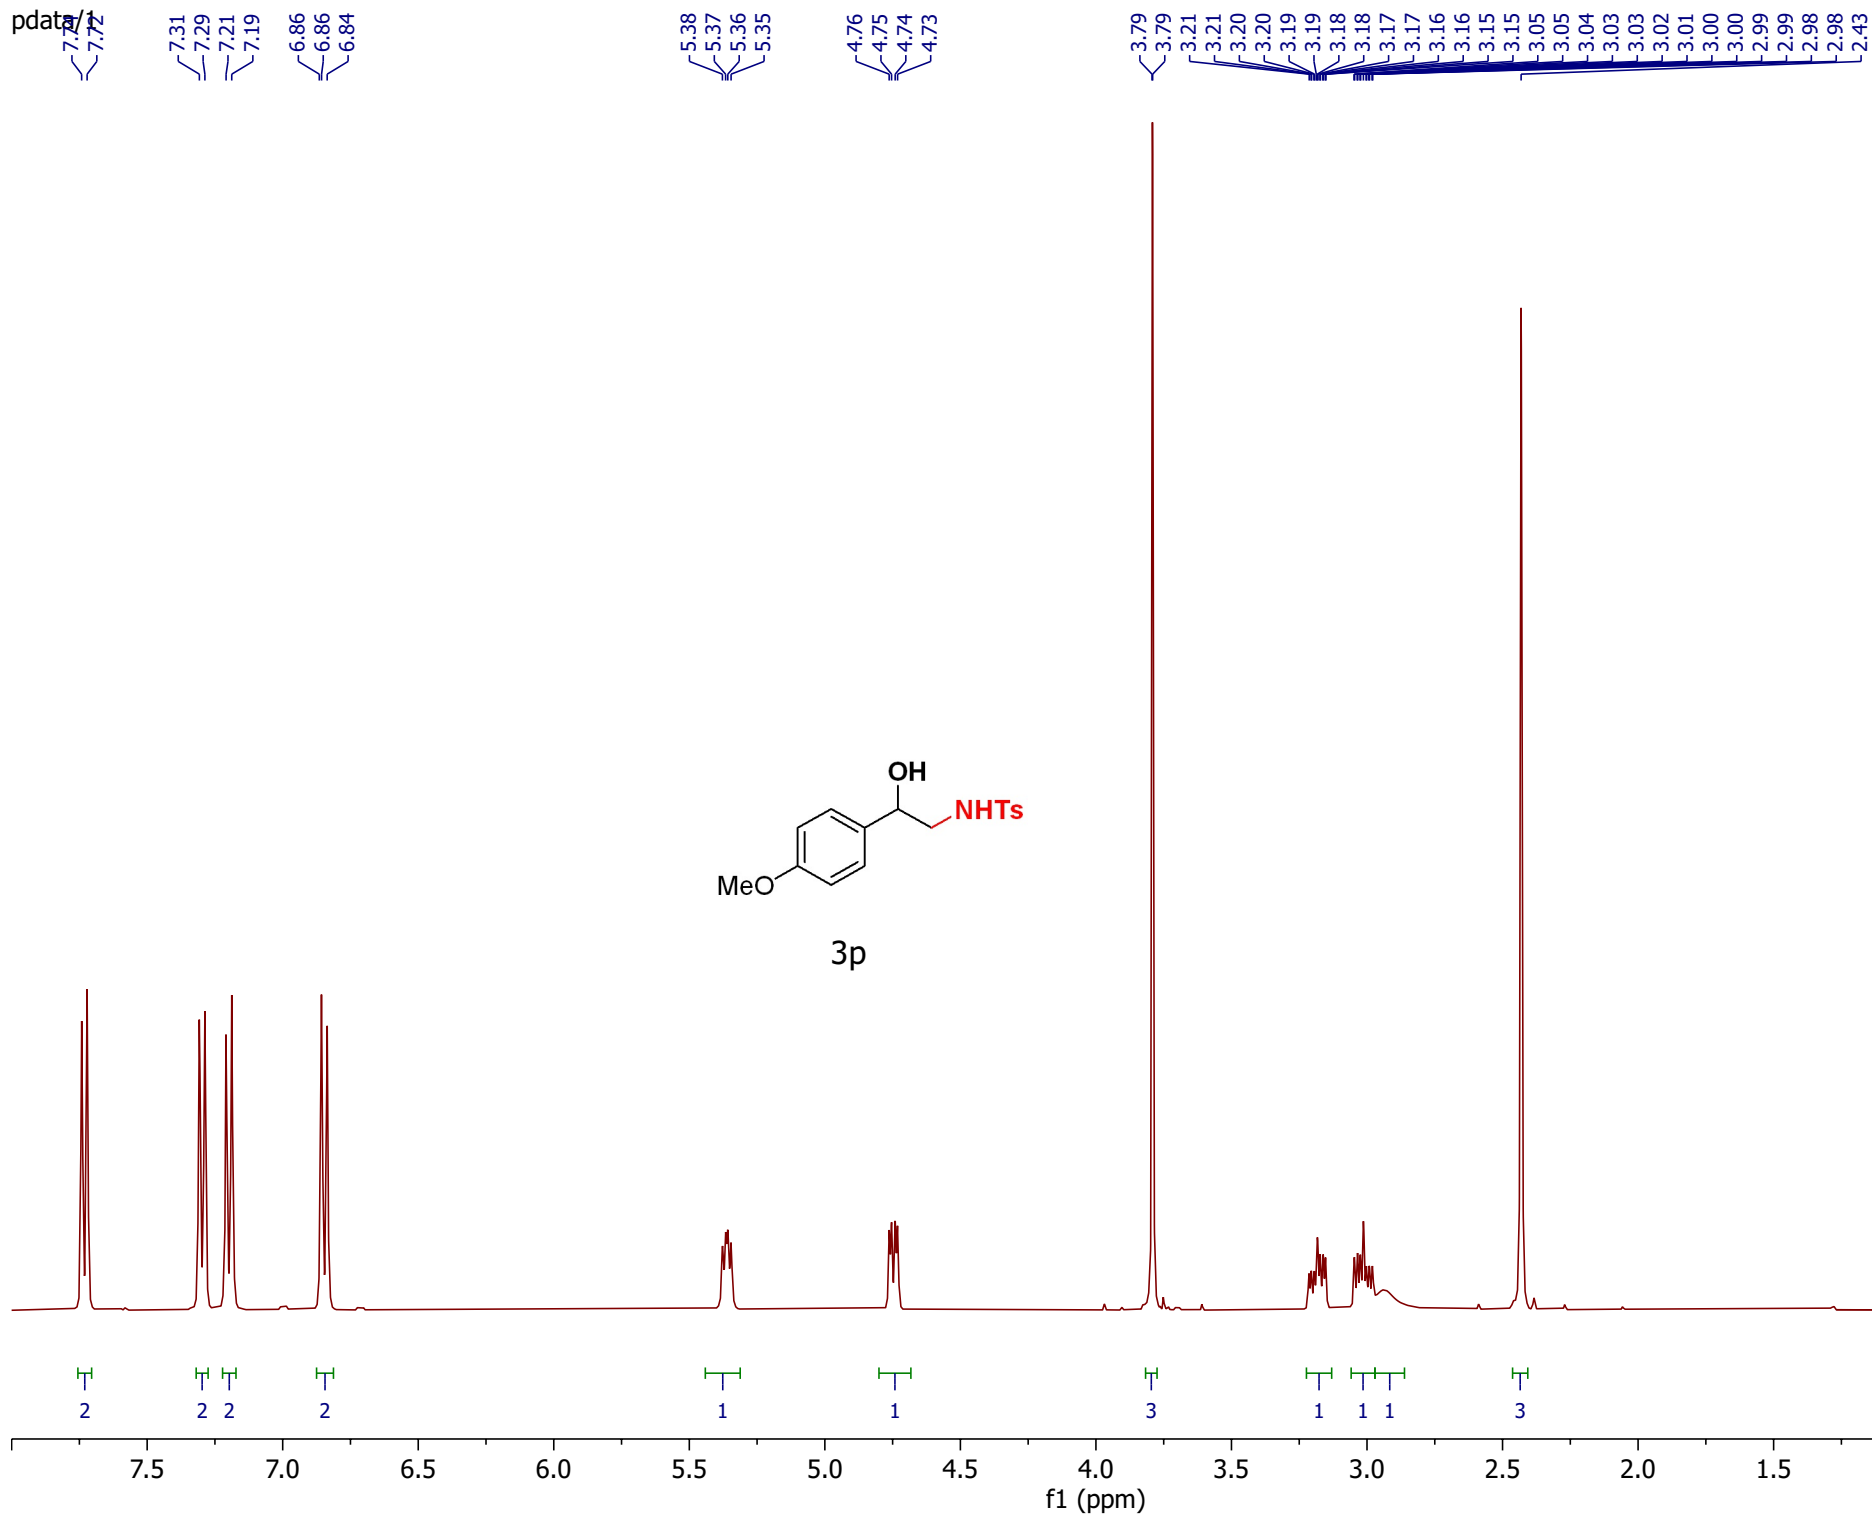

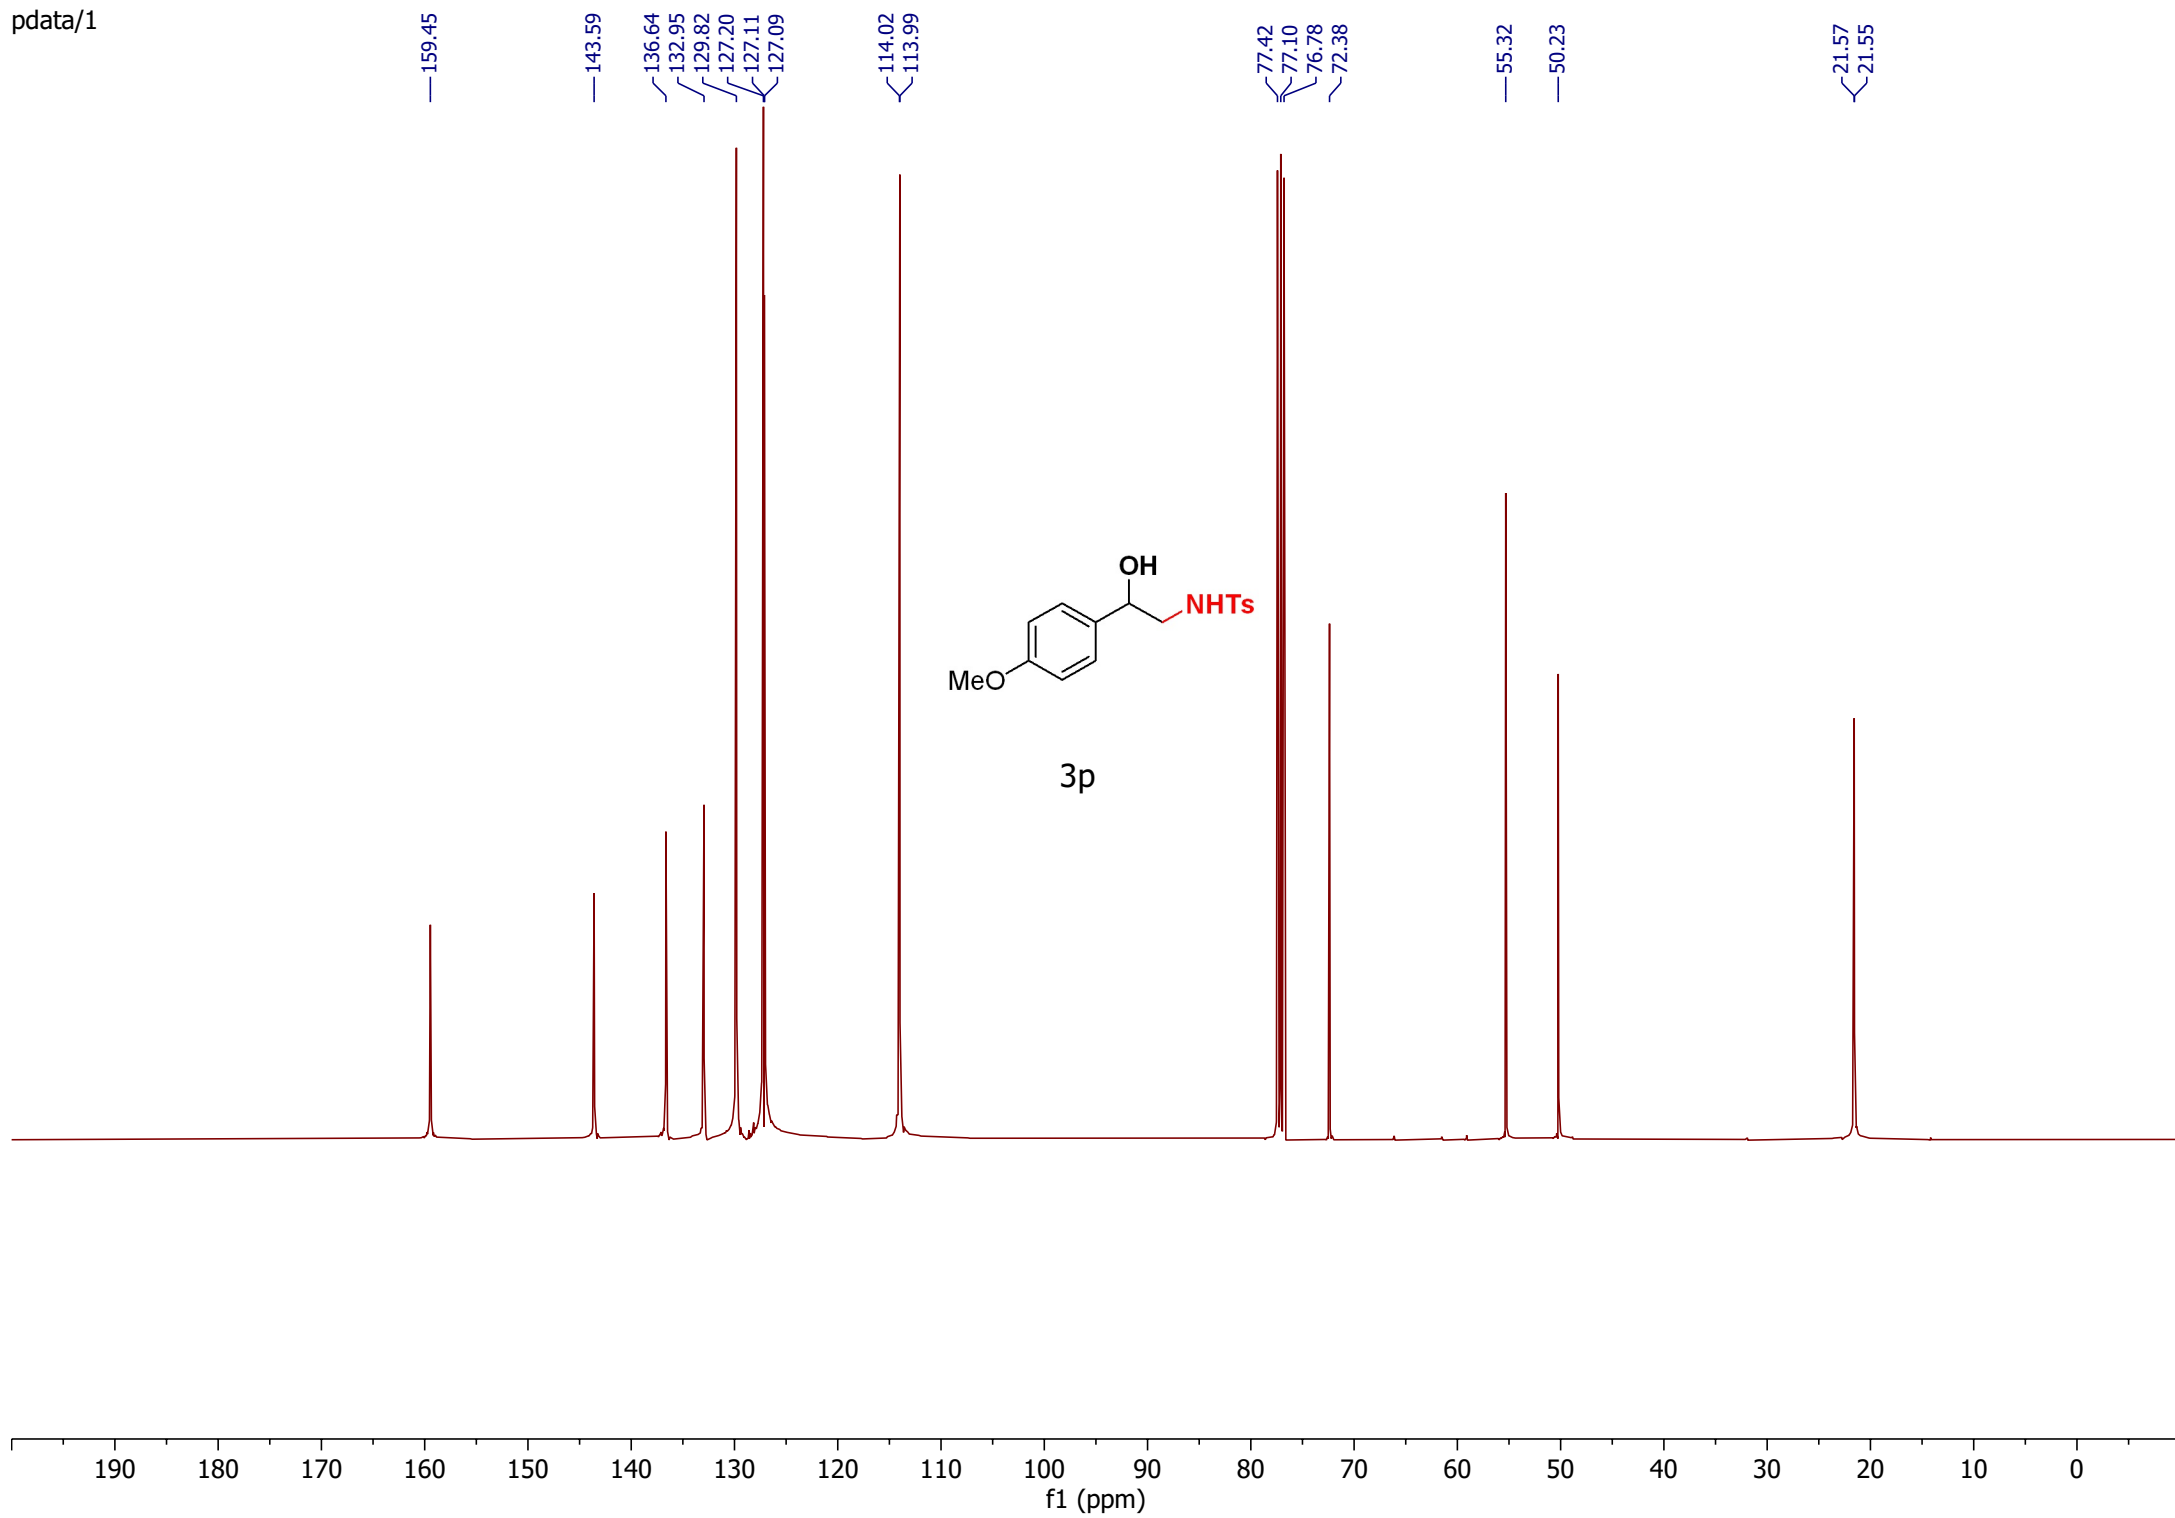

ppm  
7.4381  
7.4374  
7.4311  
7.4222  
7.3924  
7.3839  
7.3772  
7.4325  
7.4151  
7.3714  
7.3534  
7.2596  
7.2552  
7.2046  
7.1849

5.2214  
5.2051

4.6427  
4.6275

3.7738  
3.7593

2.3727

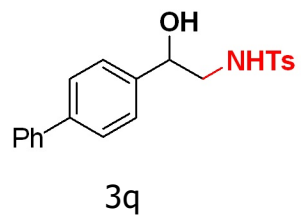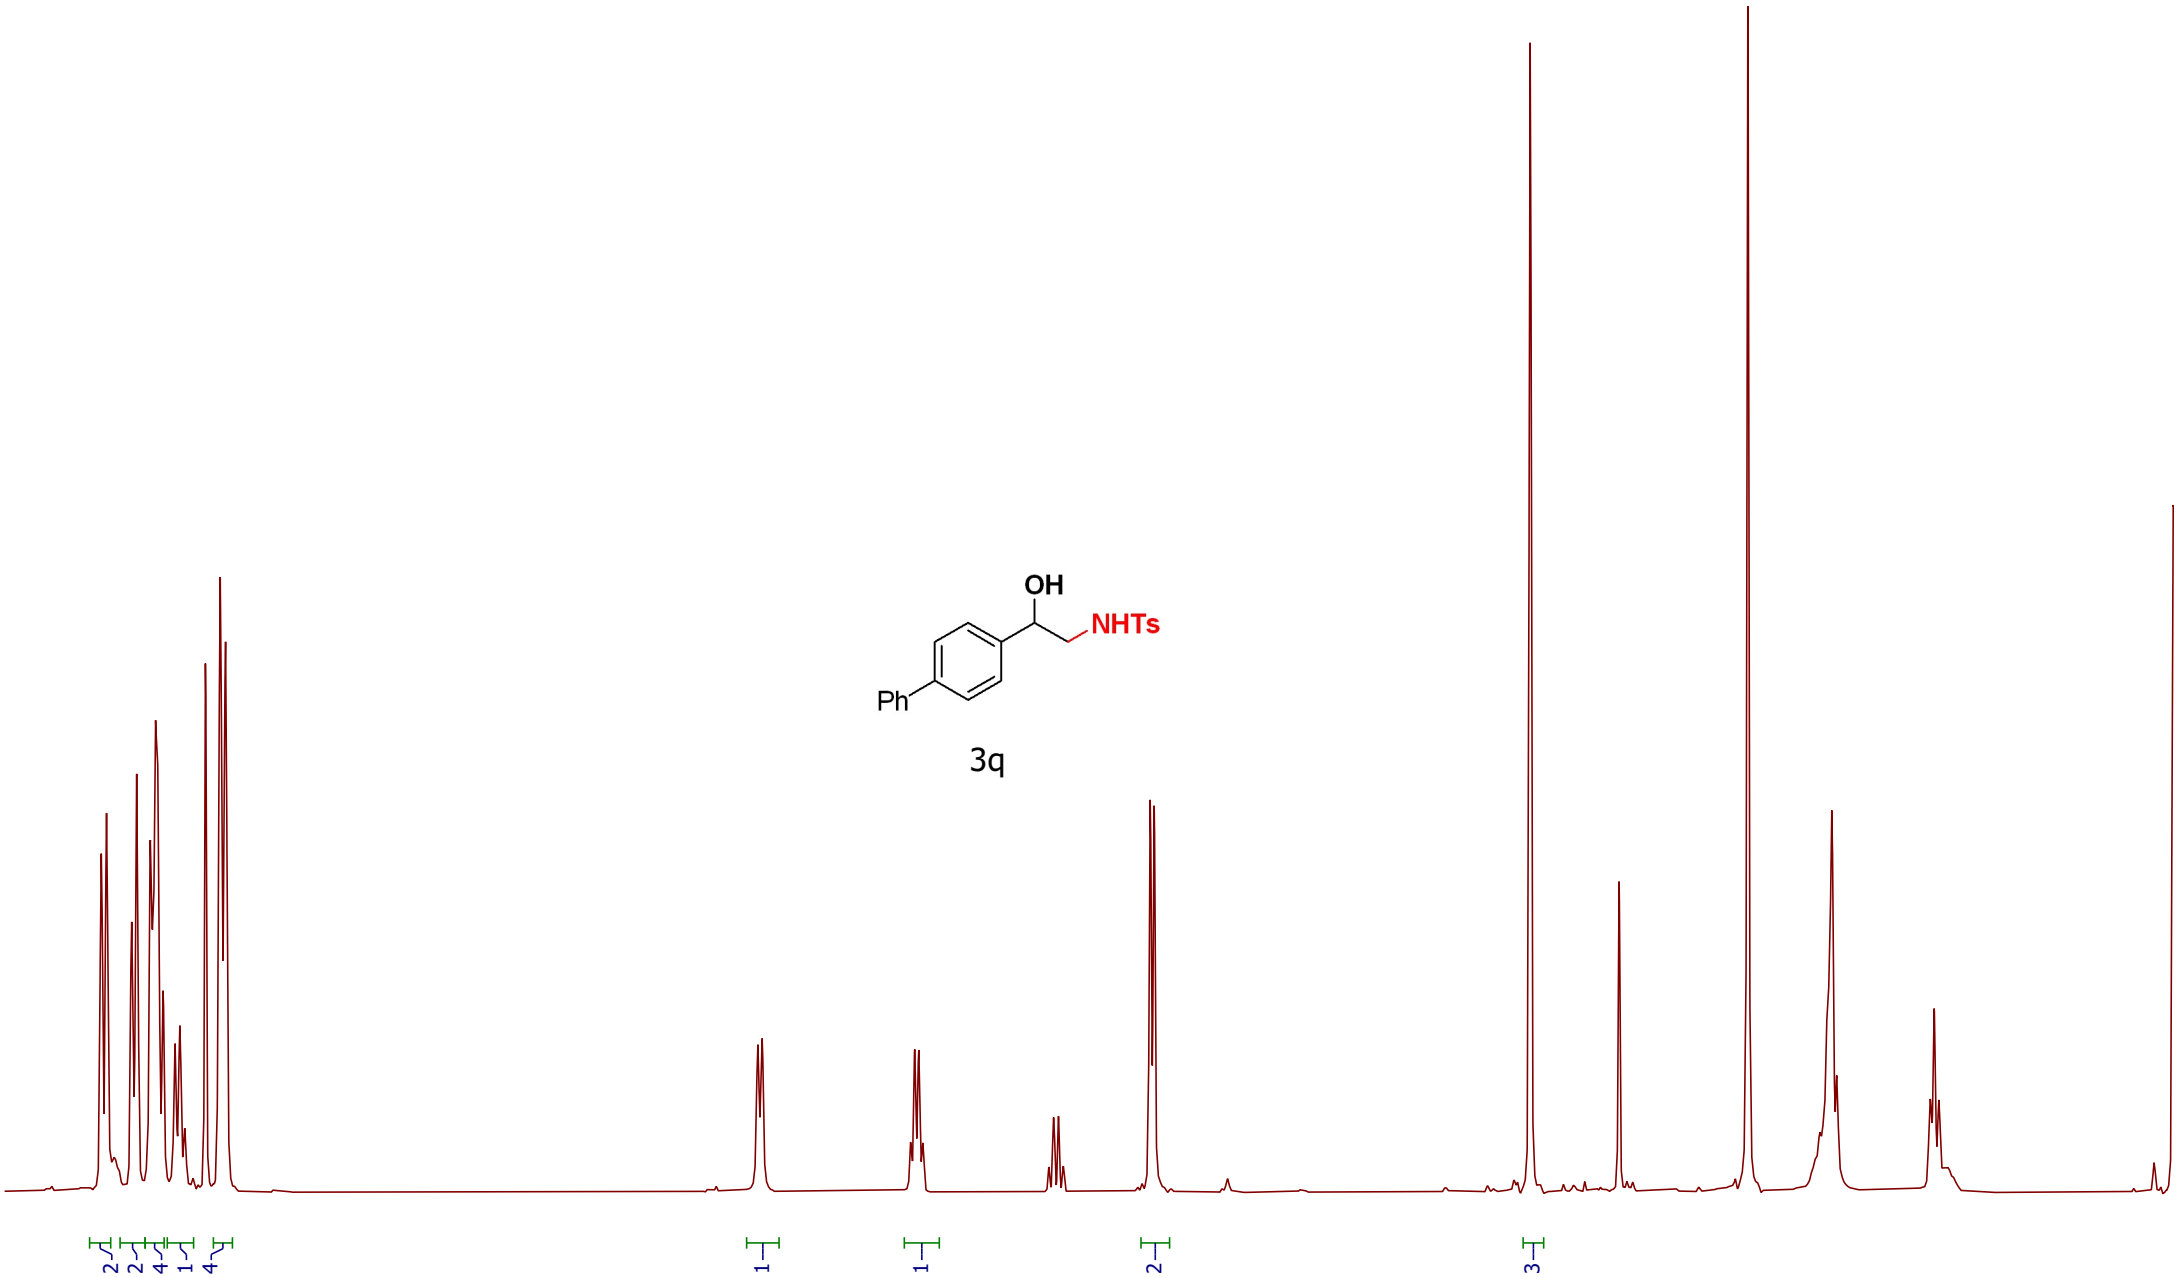

2  
2  
4  
1  
4

1

1

2

3

f1 (ppm)

7.74  
7.74  
7.72  
7.72  
7.68  
7.64  
7.62  
7.43  
7.41  
7.41  
7.40  
7.30  
7.28  
7.28  
7.19  
7.17

4.92  
4.91  
4.90  
4.89

3.30  
3.29  
3.27  
3.26  
3.25  
3.08  
3.07  
3.06  
3.05  
3.04  
3.02

2.33

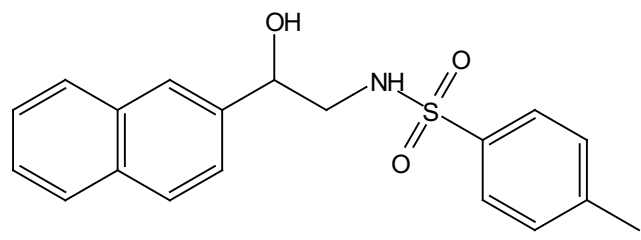

3r

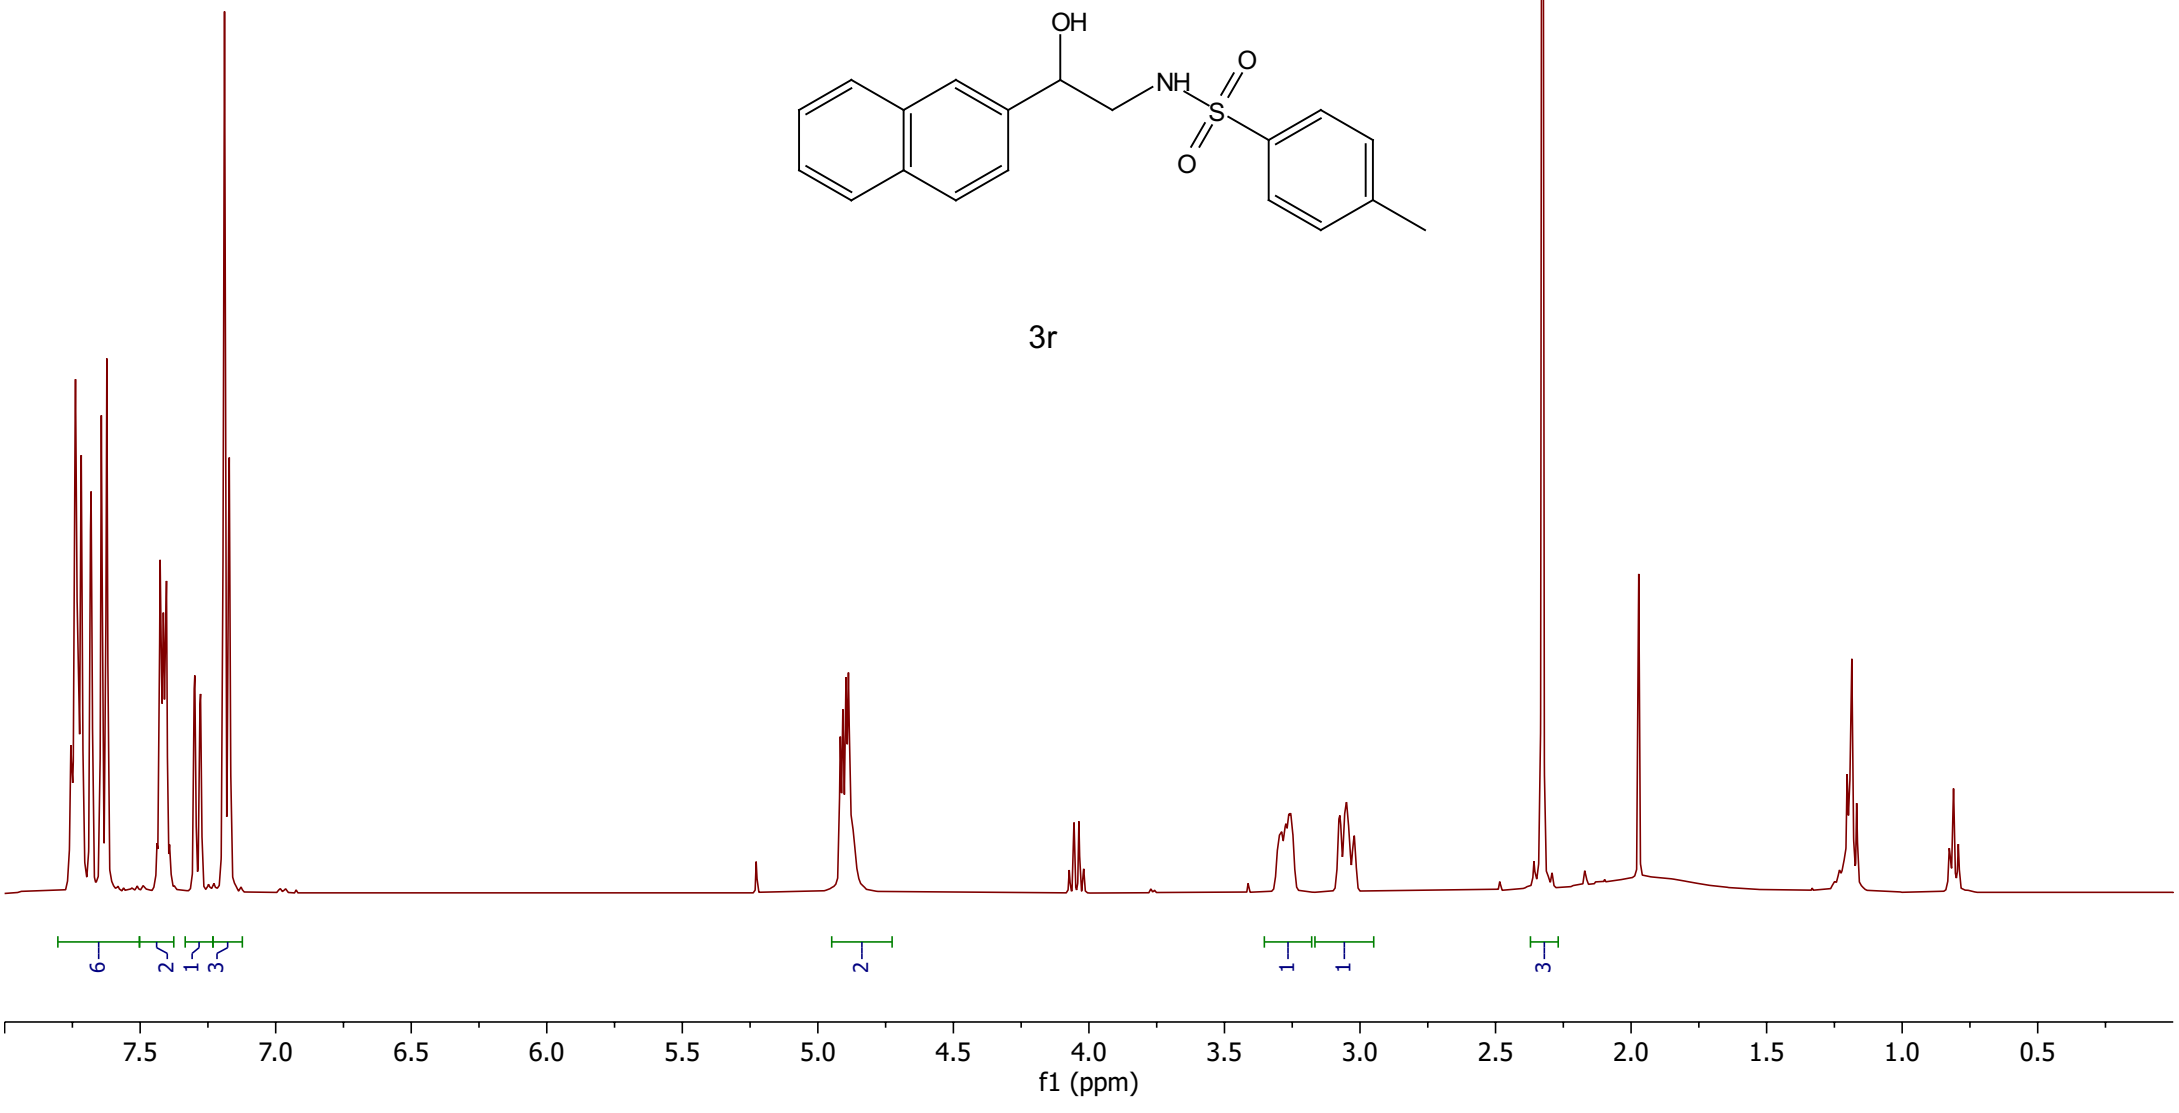

6

2

1 1

3



143.61  
133.15  
133.14  
129.79  
129.73  
128.47  
128.02  
127.71  
127.07  
126.44  
126.21  
124.93  
123.65

77.40  
77.06  
76.76  
72.86

50.19

21.54

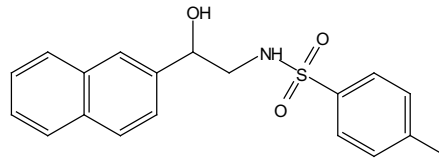

3r

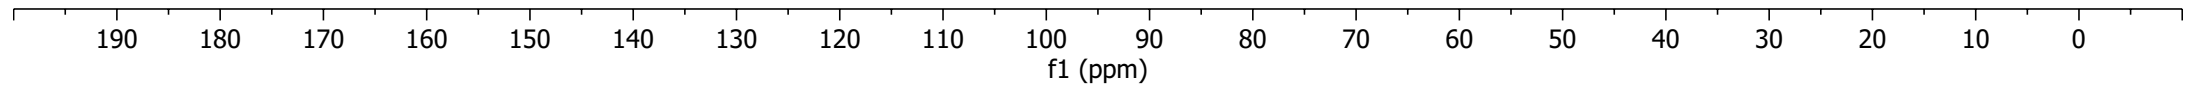

pd data 1  
7.66  
7.24  
7.22  
7.21  
7.19  
7.19  
7.17  
6.96  
6.94  
6.92

4.97  
4.97  
4.95  
4.75  
4.74  
4.72  
4.72  
3.17  
3.17  
3.16  
3.15  
3.15  
3.14  
3.14  
3.13  
3.13  
3.12  
3.11  
3.11  
2.96  
2.96  
2.95  
2.94  
2.94  
2.93  
2.92  
2.92  
2.91  
2.91  
2.90  
2.90  
2.89  
2.89  
2.36  
2.36

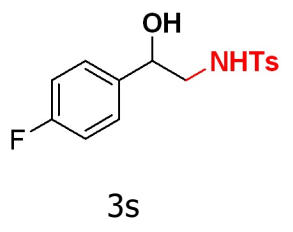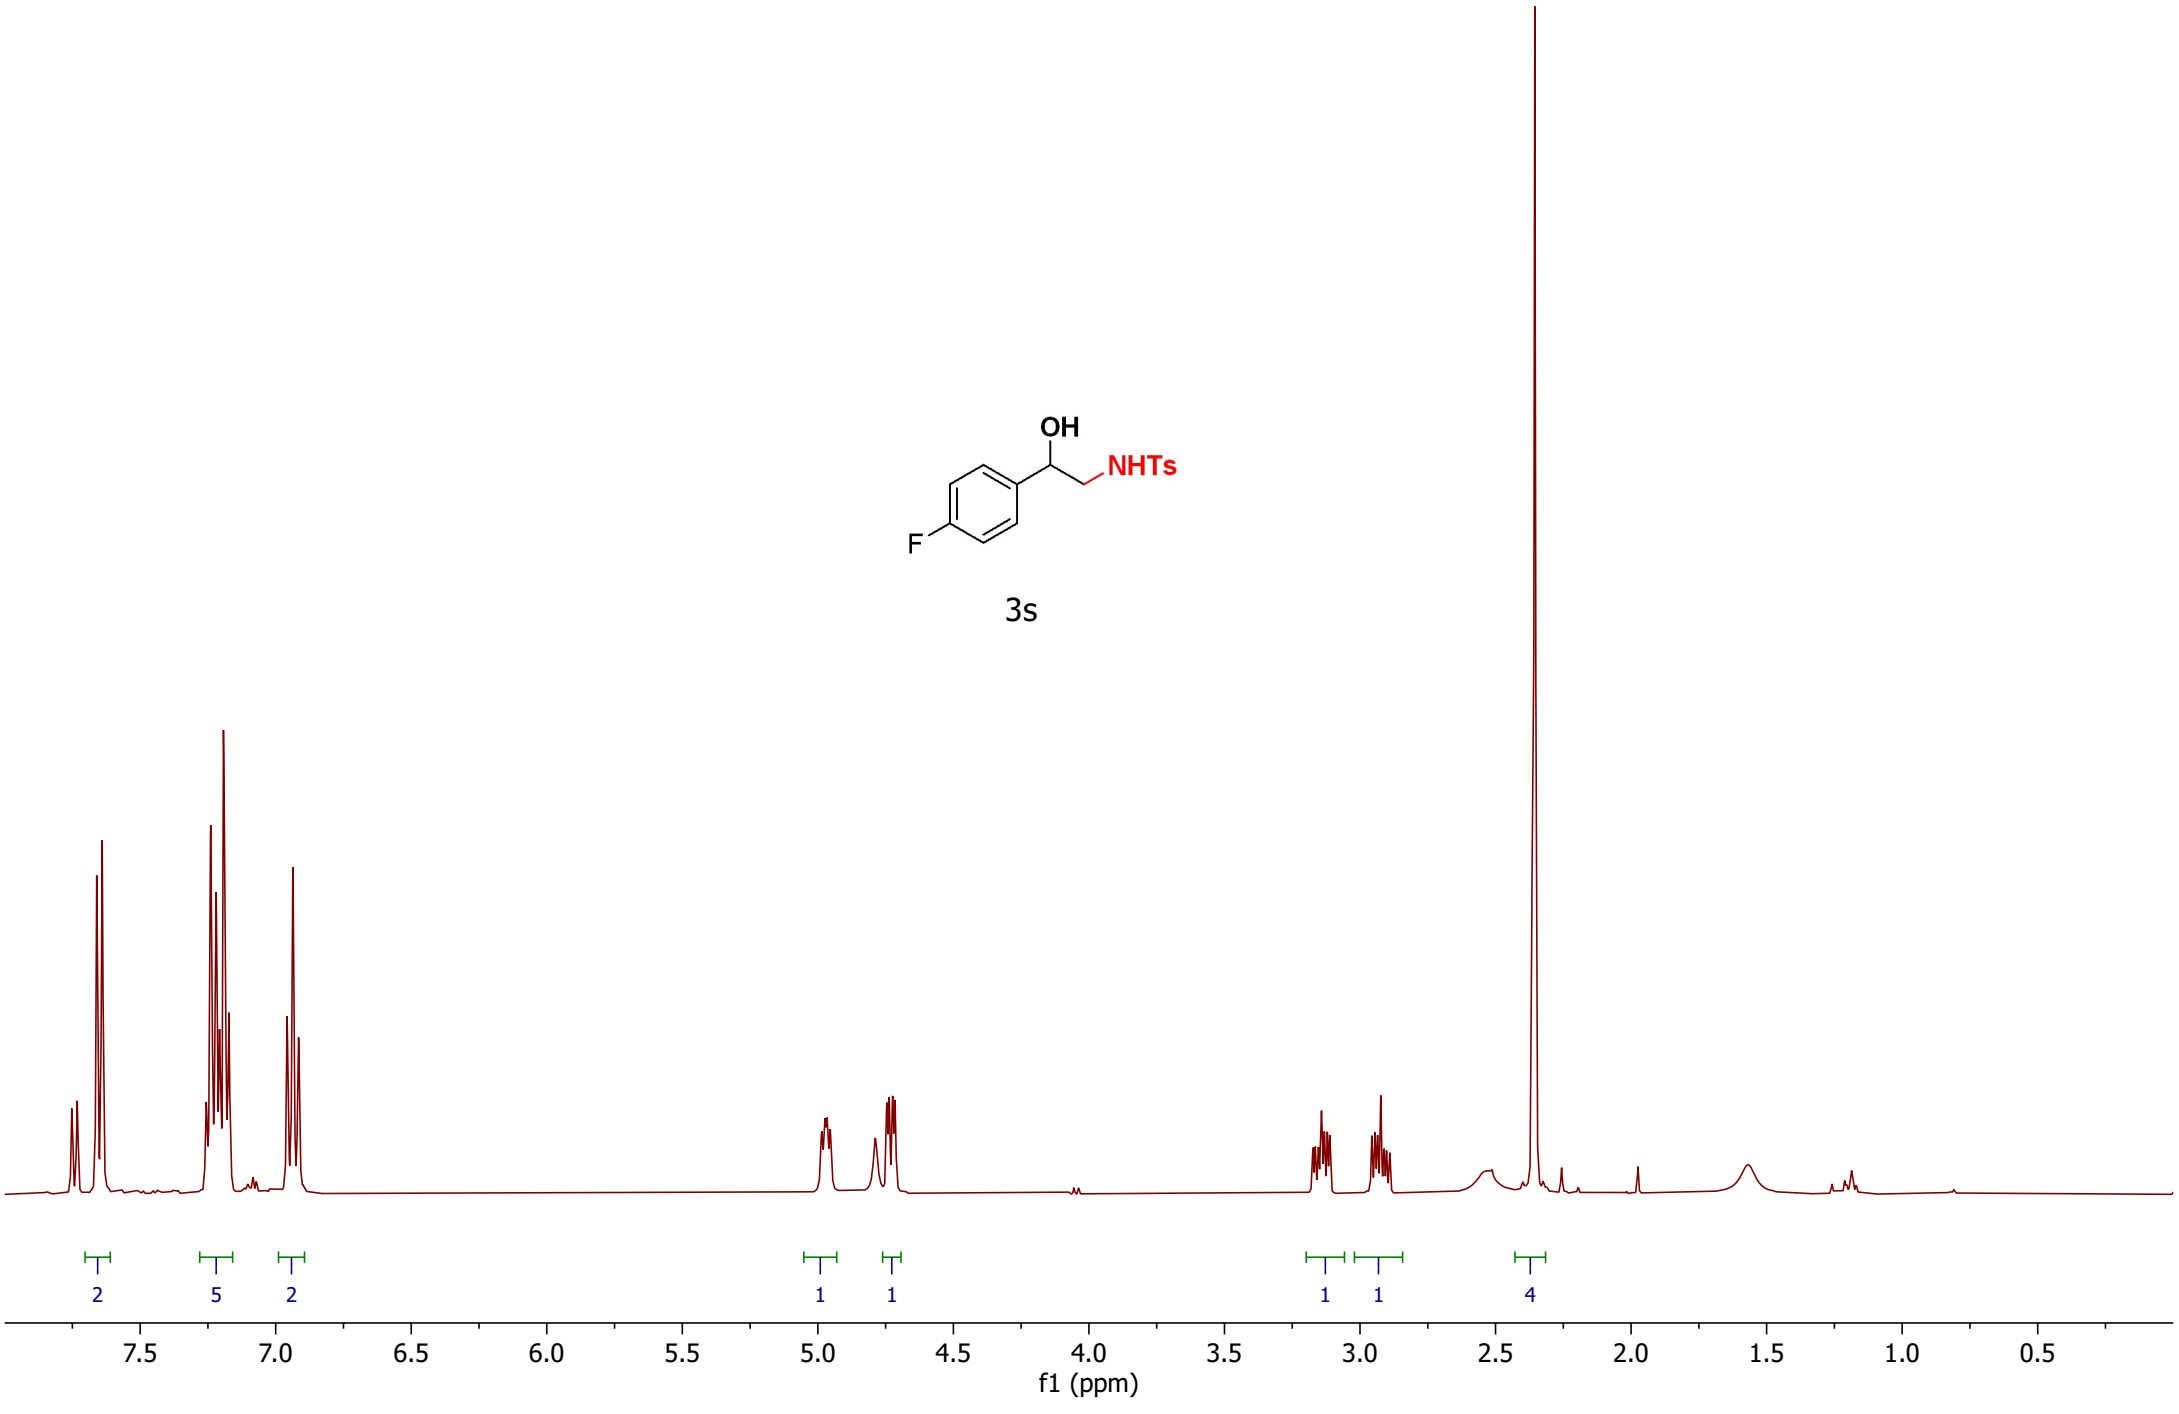

163.77  
163.75  
161.31

143.77  
143.73  
139.00  
136.59  
136.53  
130.12  
129.87  
129.76  
127.85  
127.70  
127.65  
127.57  
127.55  
127.27  
127.19  
127.09  
127.03  
126.74  
126.49  
126.47  
115.68  
115.47  
115.45

72.22

50.24  
50.21

21.57

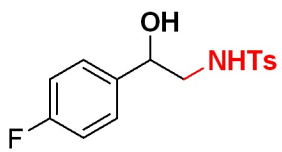

3s

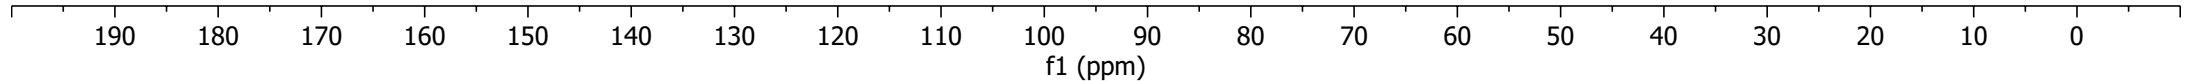

pdata/1

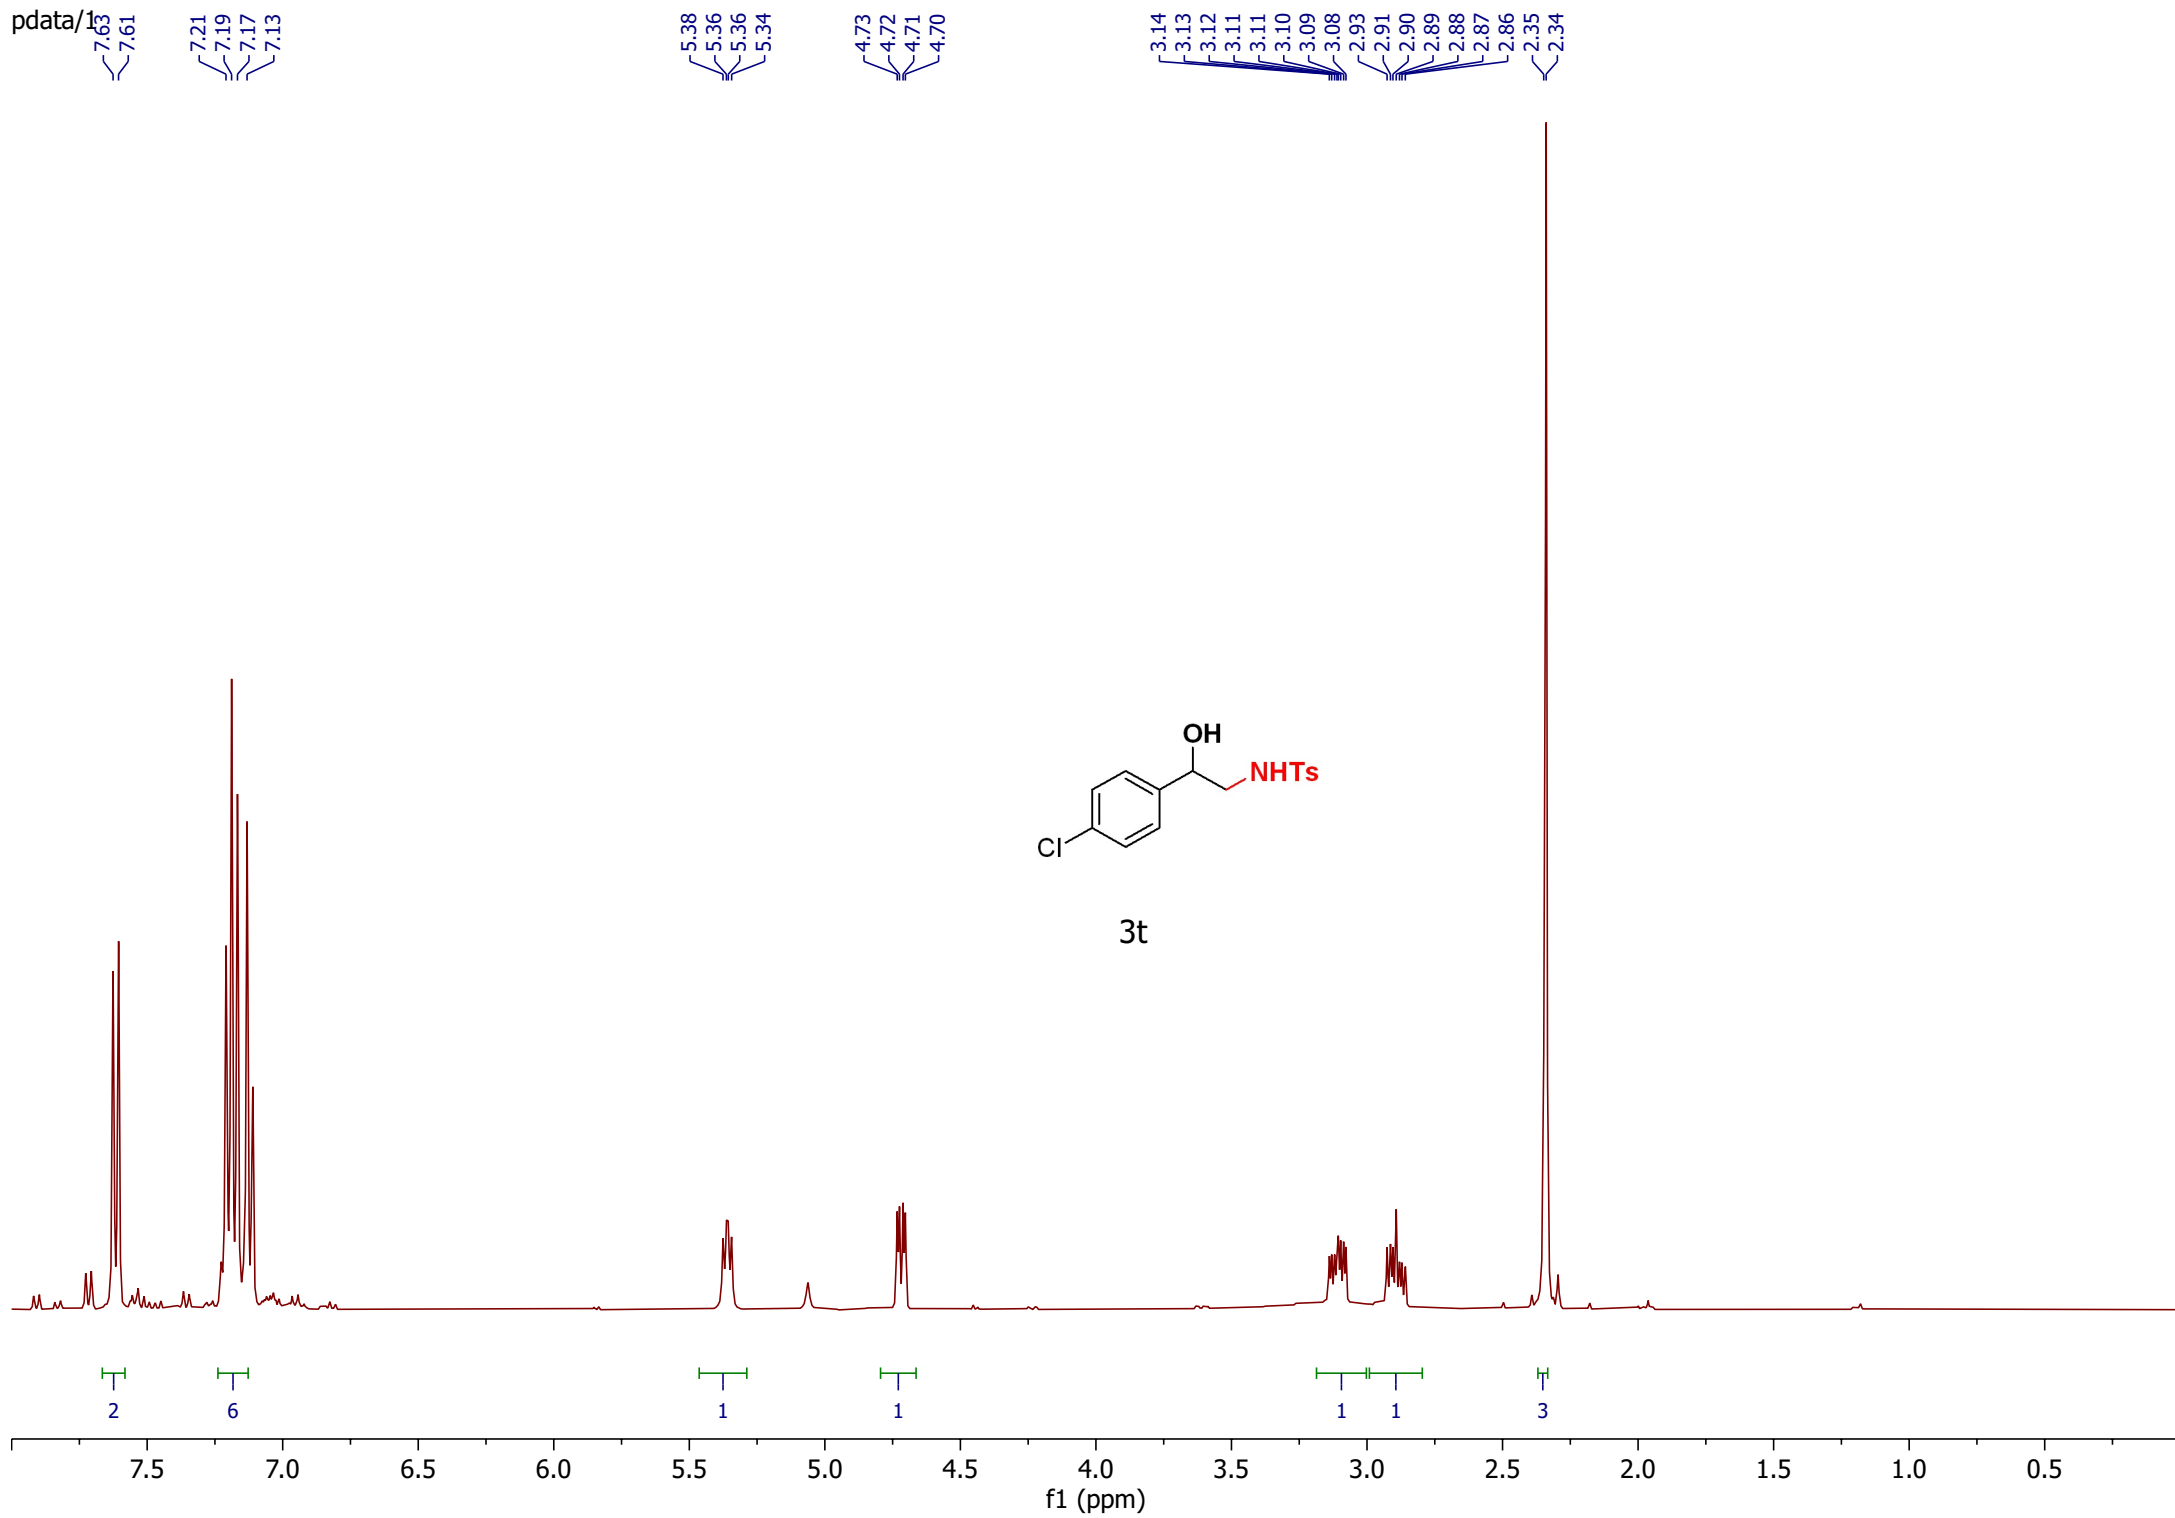

143.79  
139.30  
136.43  
133.86  
129.92  
129.88  
129.85  
128.74  
128.70  
127.31  
127.06  
127.01  
127.00

72.15

50.18

21.58

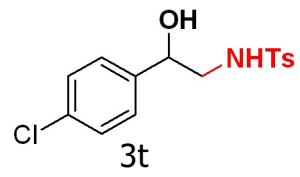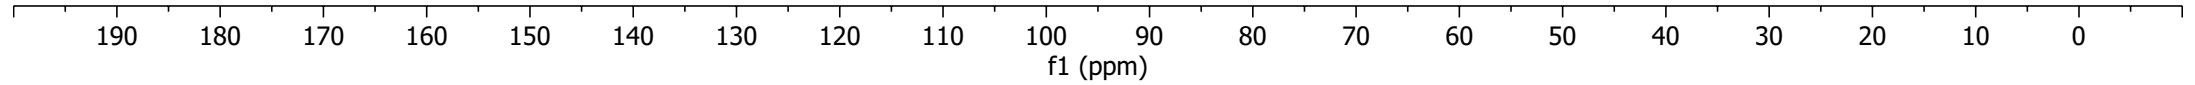

pdata/1

7.65  
7.61  
7.35  
7.33  
7.22  
7.20  
7.19  
7.08  
7.06

5.30  
5.29  
5.28  
5.27

4.72  
4.71  
4.70  
4.69

3.14  
3.14  
3.12  
3.12  
3.11  
3.10  
3.09  
3.08  
2.92  
2.91  
2.90  
2.89  
2.88  
2.87  
2.86  
2.35  
2.35

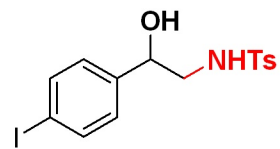

3u

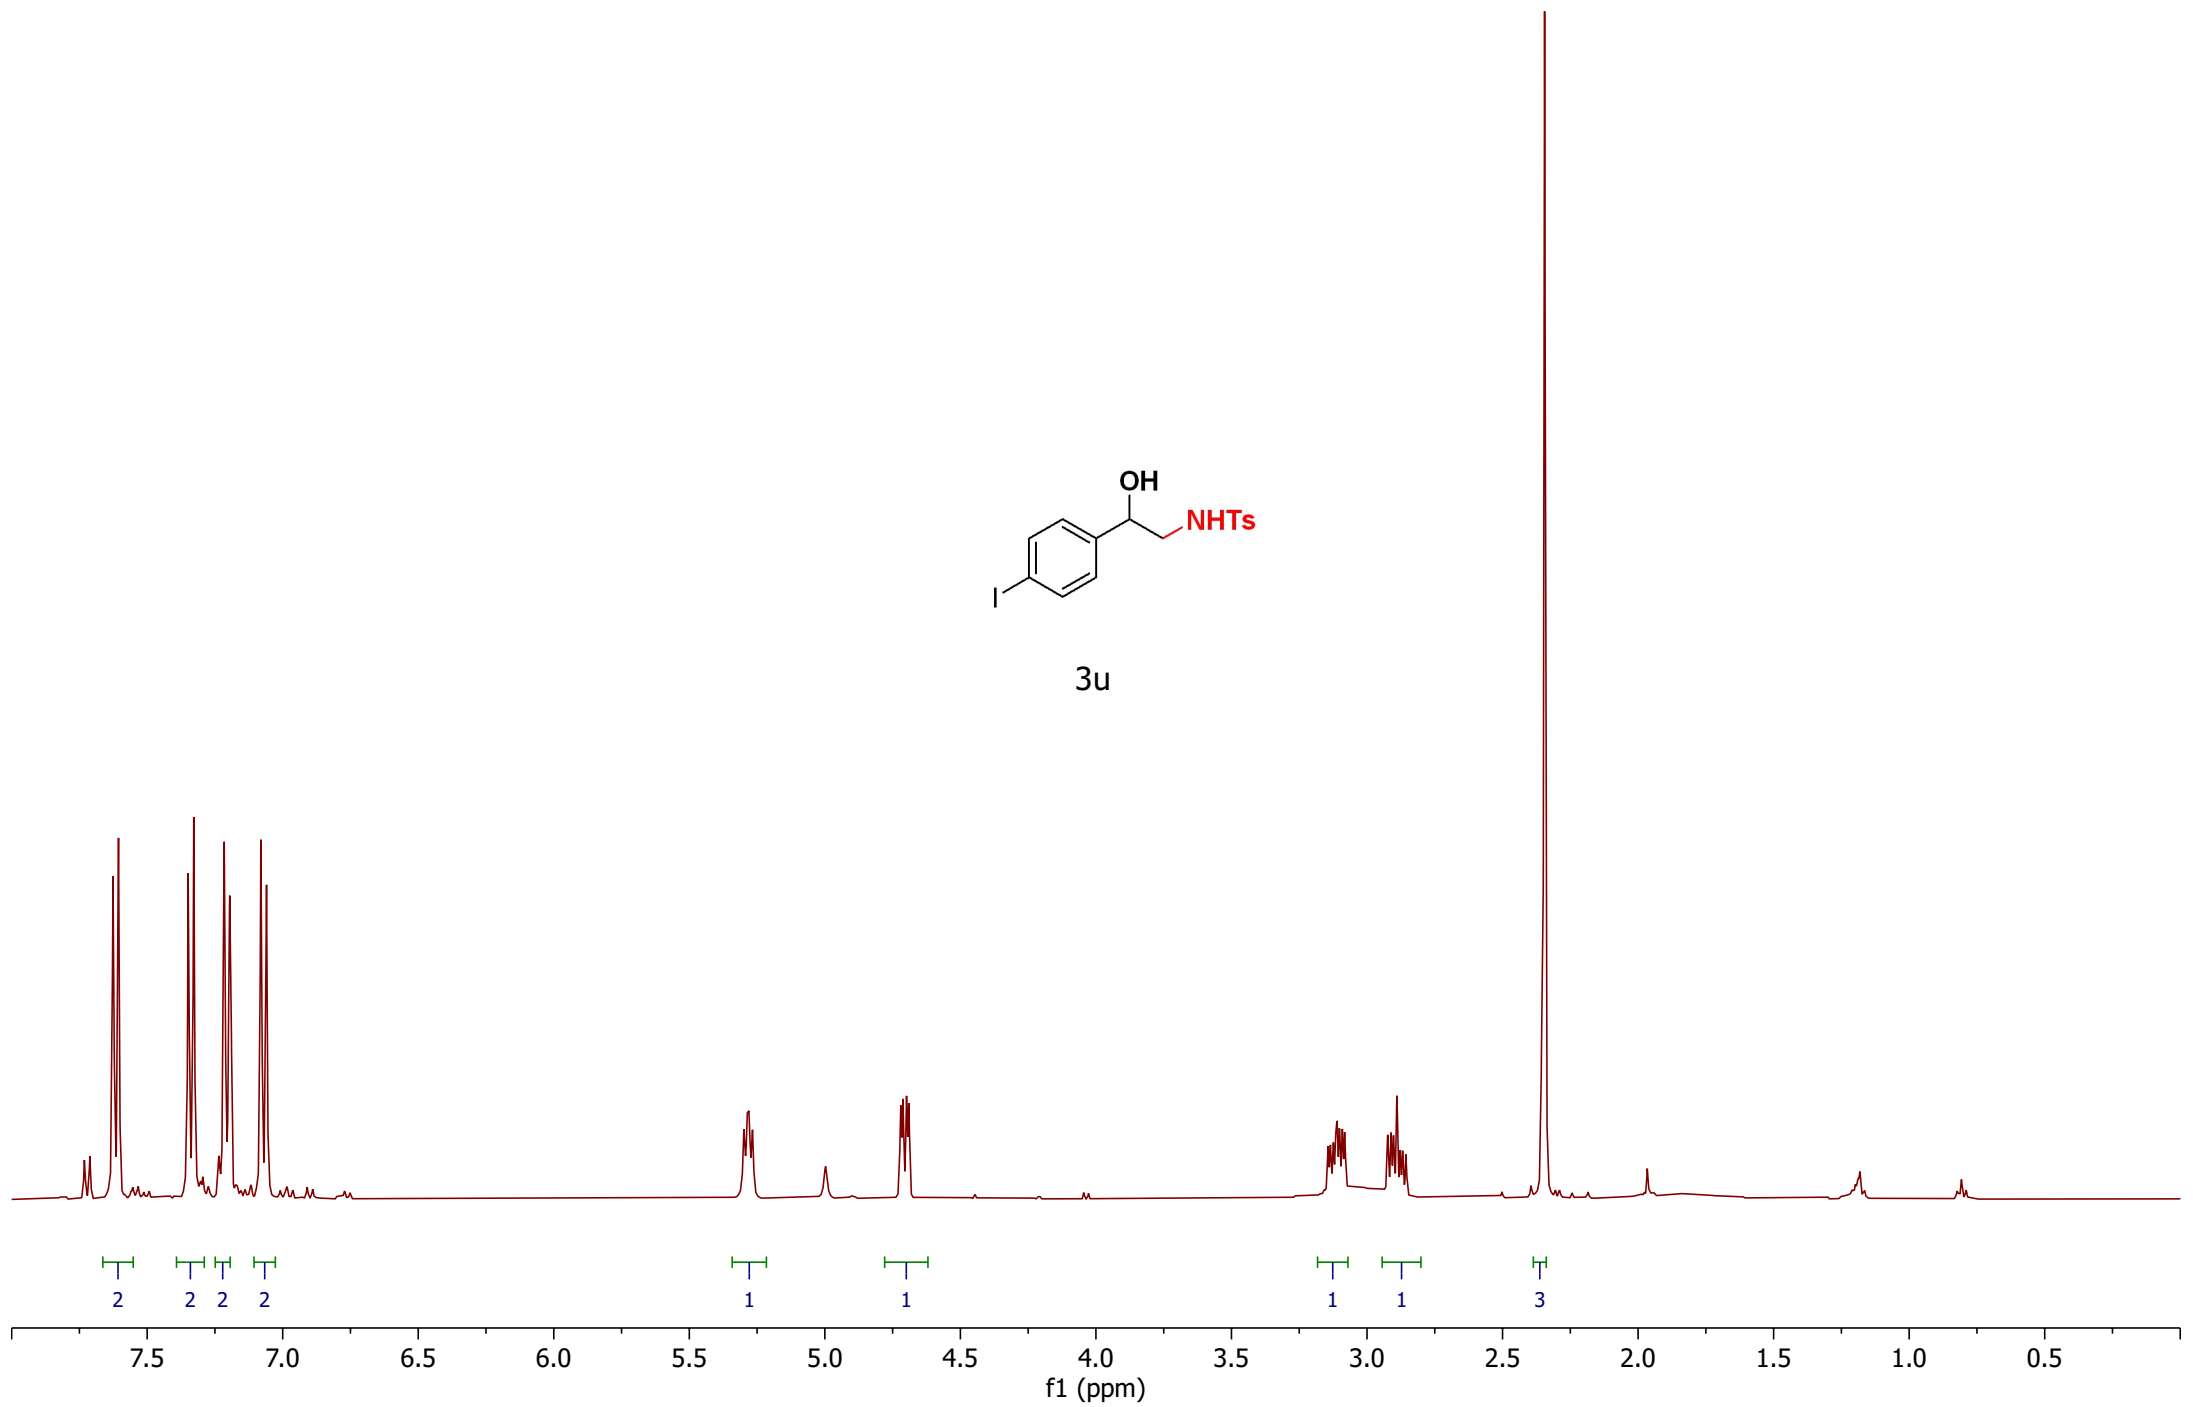

f1 (ppm)

143.80  
139.81  
136.46  
131.72  
131.70  
129.92  
129.87  
127.61  
127.60  
127.06  
127.01  
126.46  
122.05

72.19

50.10

21.59

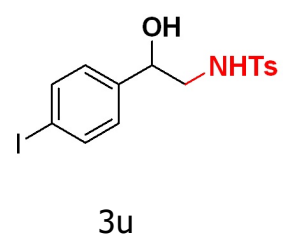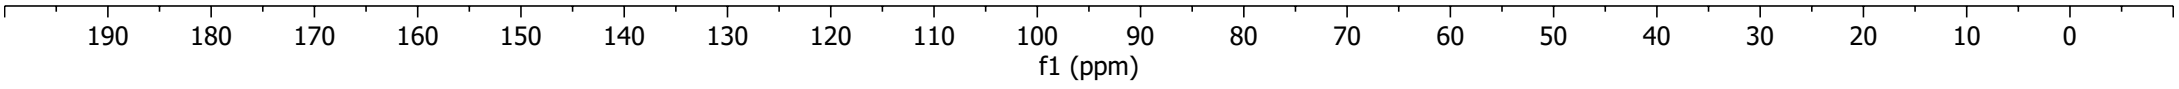

GML\_Ox\_3Cl\_1219\_910\_1r

7.61  
7.58  
7.17  
7.14  
7.13  
7.08  
7.04  
7.01

5.85

4.70  
4.69  
4.67  
4.67

3.44  
3.08  
3.07  
3.04  
3.04  
3.03  
2.88  
2.86  
2.85  
2.83

2.29

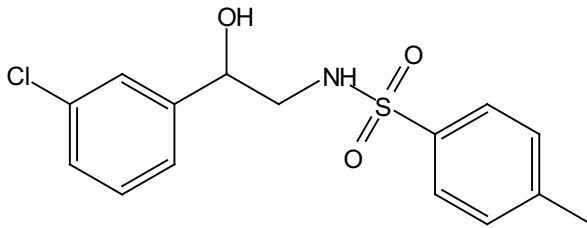

3v

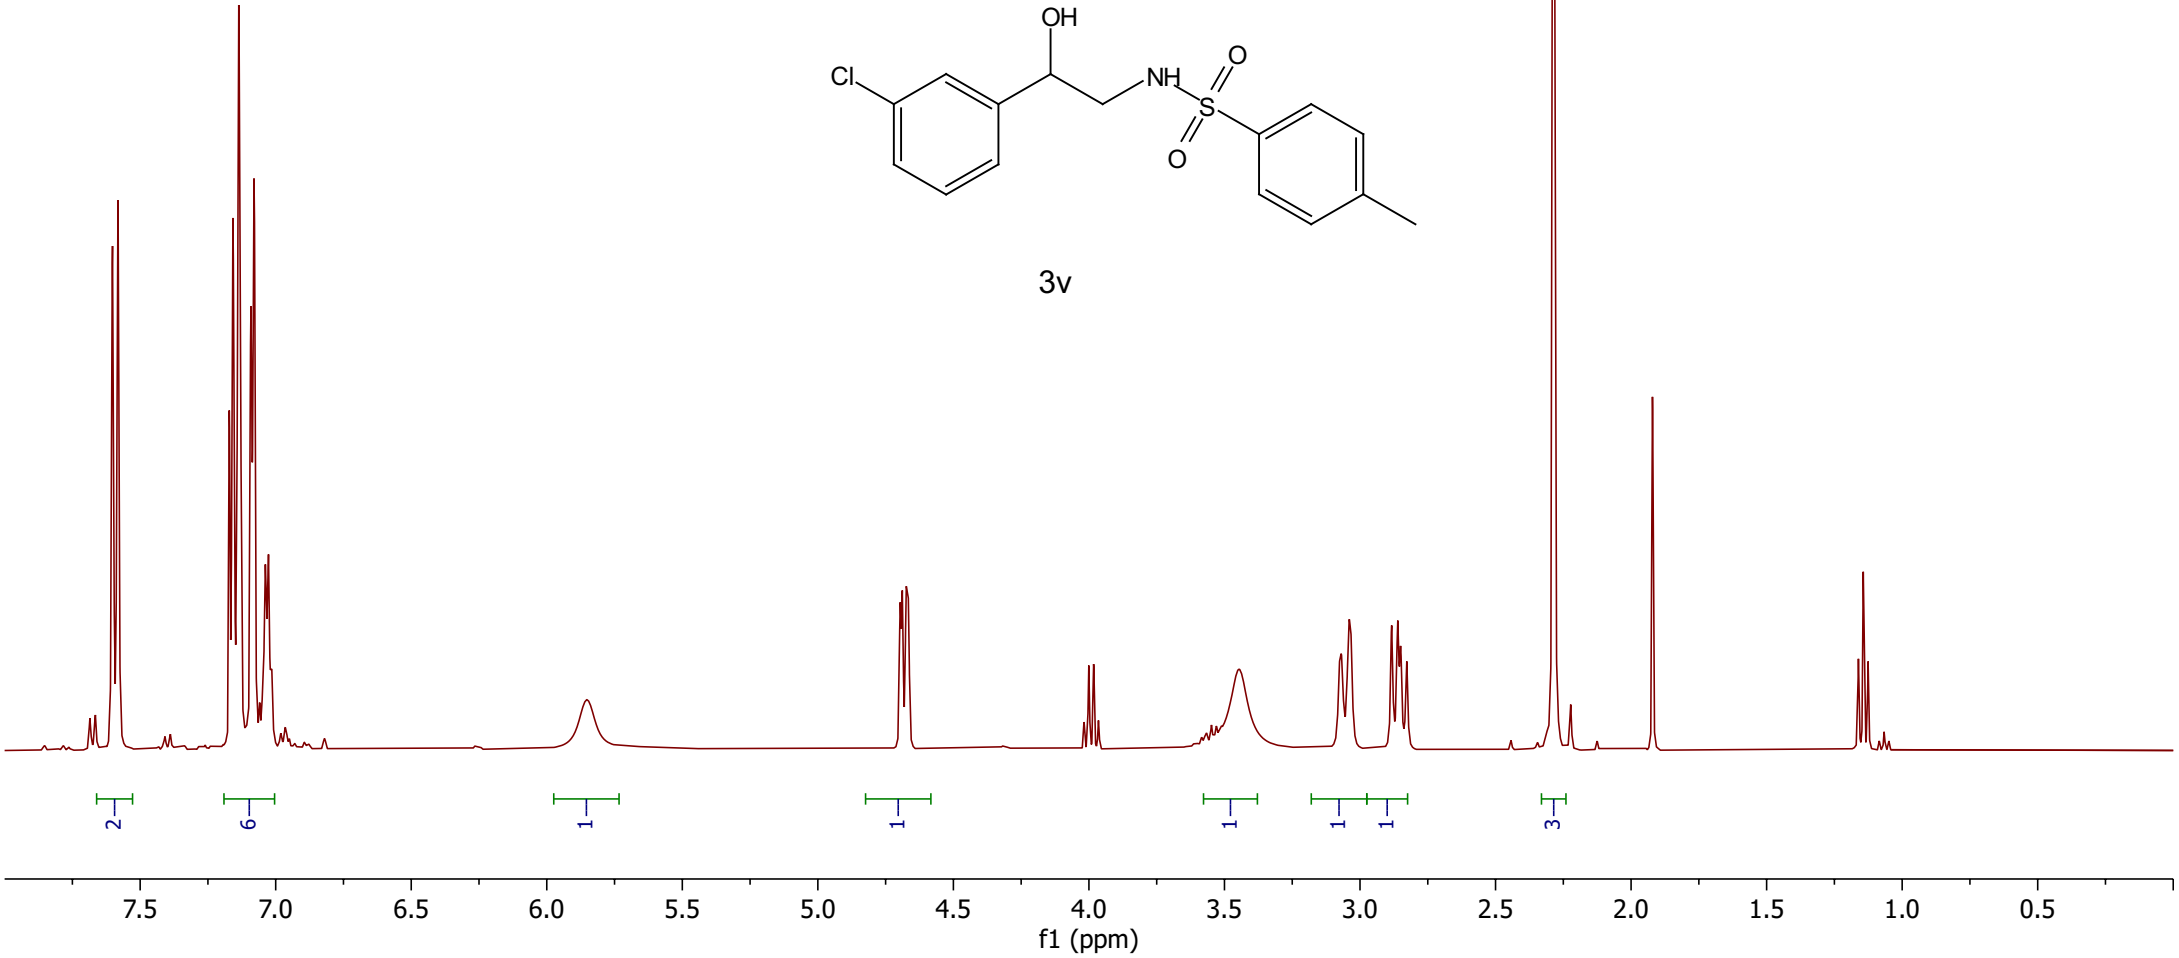



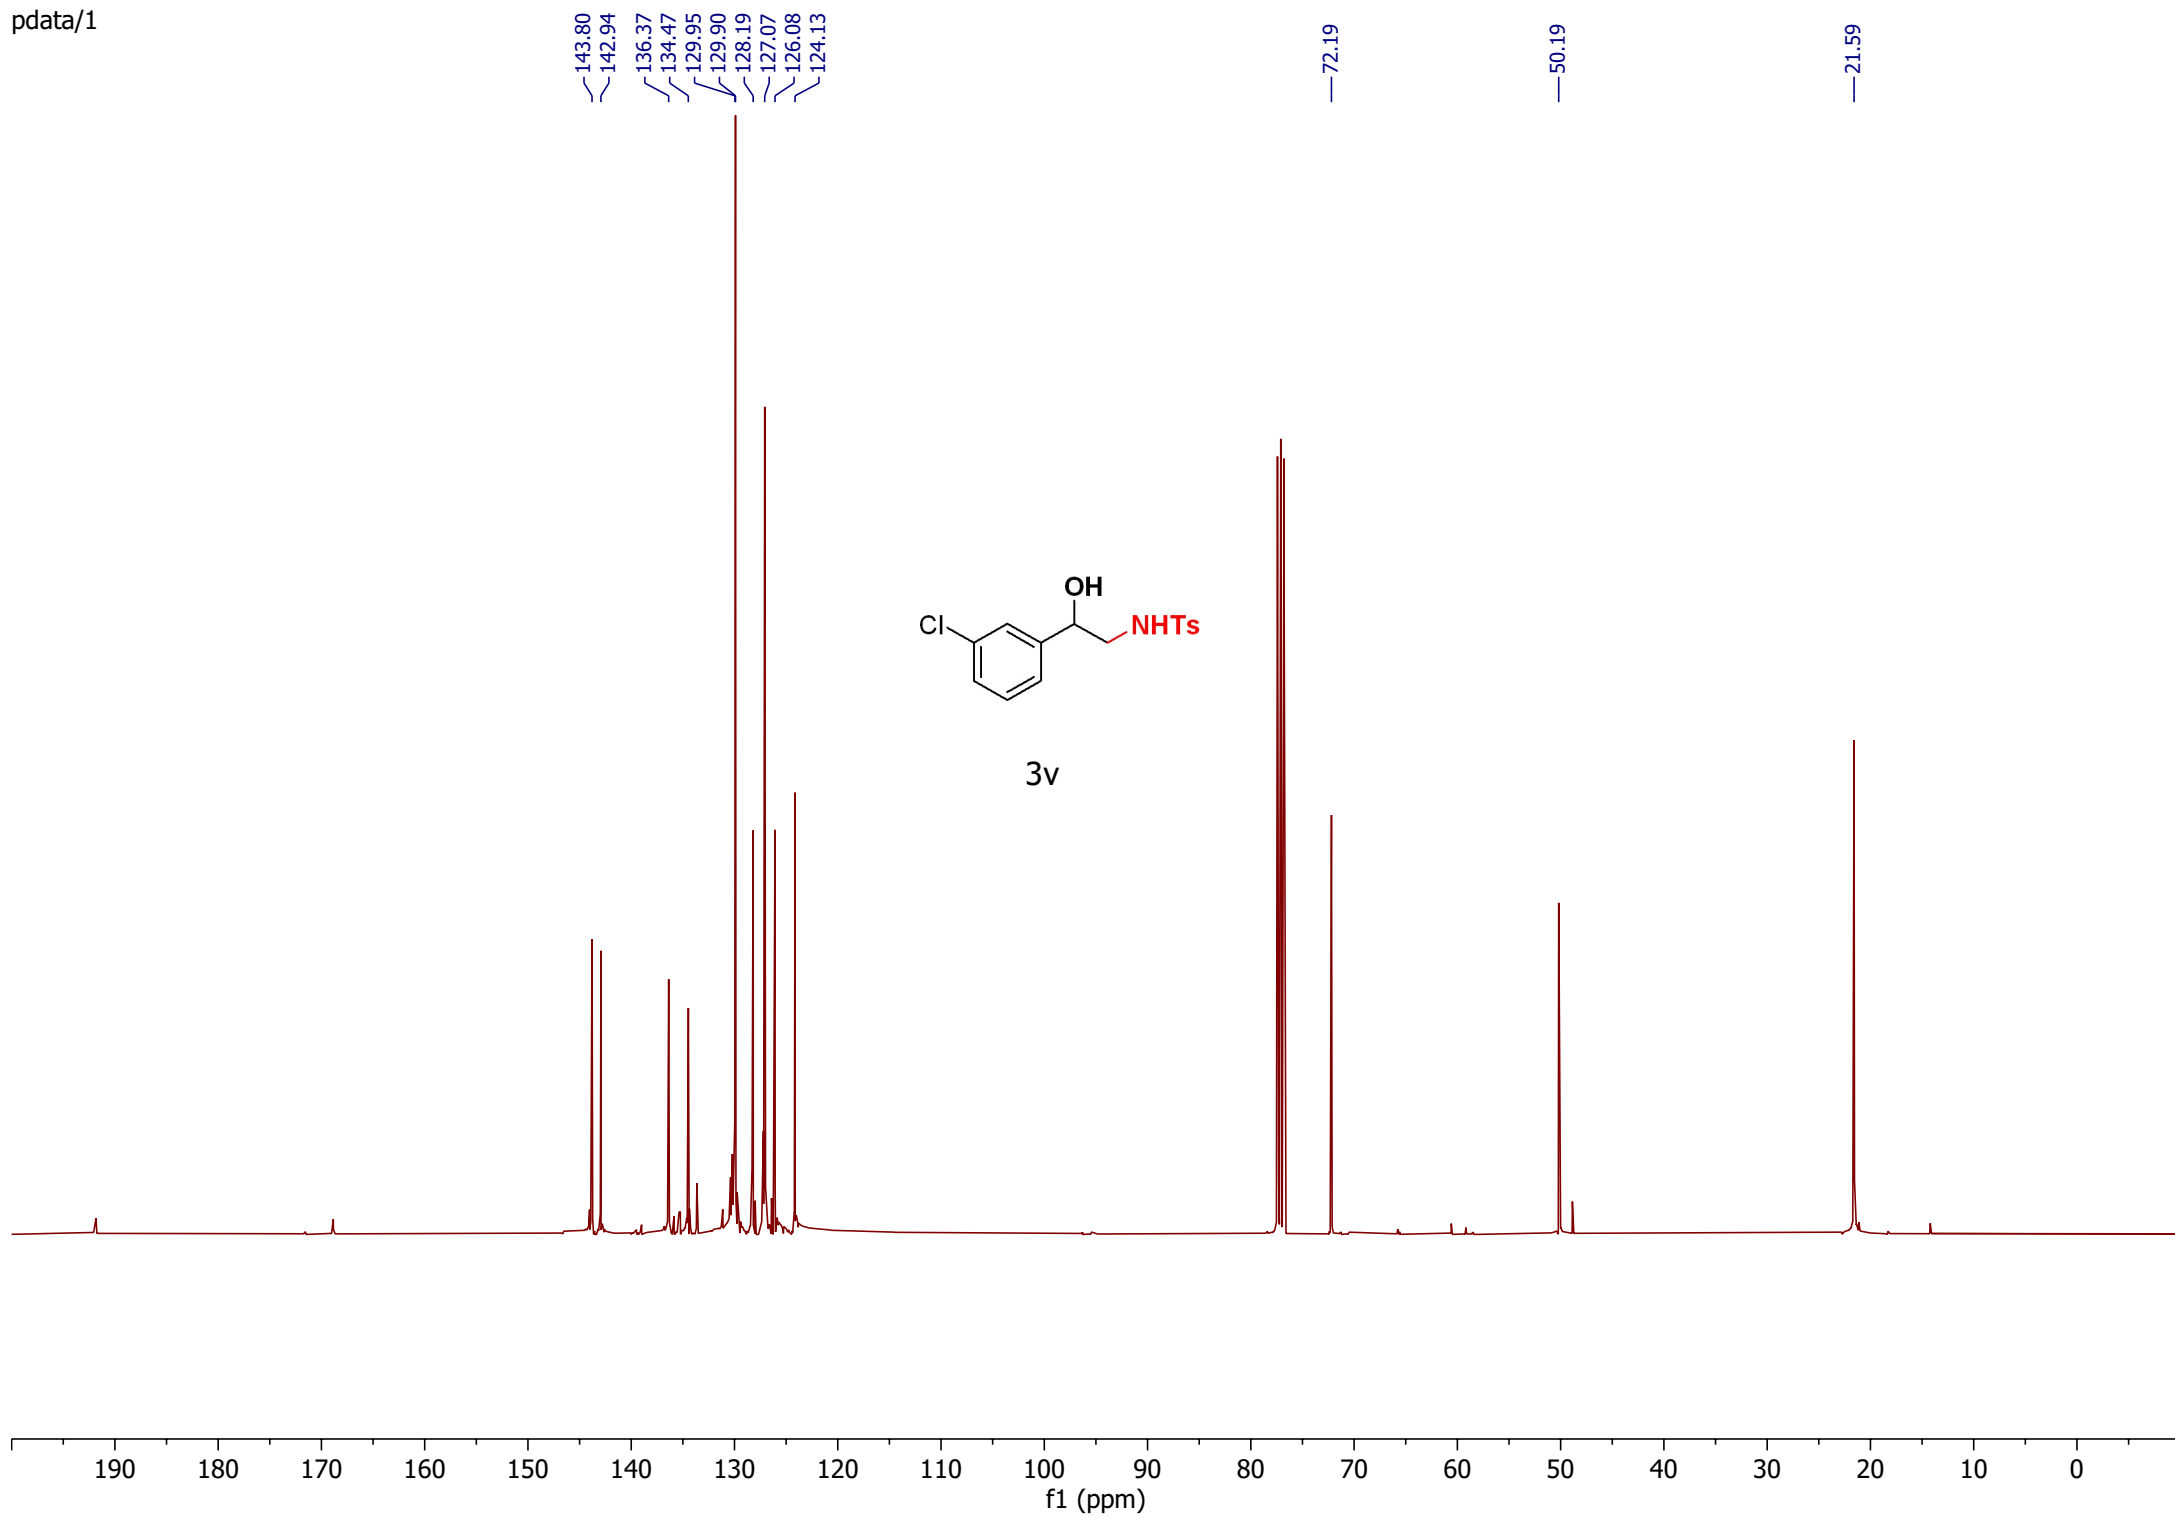

GMI-02  
7.17  
7.16  
7.15  
7.14  
7.13  
7.12  
7.11  
7.10  
7.09  
7.08  
7.07  
7.06  
7.05  
7.04  
7.03  
7.02  
7.01  
7.00  
6.99  
6.98  
6.97  
6.96  
6.95  
6.94  
6.93  
6.92  
6.91  
6.90  
6.89  
6.88  
6.87  
6.86  
6.85  
6.84  
6.83  
6.82  
6.81  
6.80  
6.79  
6.78  
6.77  
6.76  
6.75  
6.74  
6.73  
6.72  
6.71  
6.70  
6.69  
6.68  
6.67  
6.66  
6.65  
6.64  
6.63  
6.62  
6.61  
6.60  
6.59  
6.58  
6.57  
6.56  
6.55  
6.54  
6.53  
6.52  
6.51  
6.50  
6.49  
6.48  
6.47  
6.46  
6.45  
6.44  
6.43  
6.42  
6.41  
6.40  
6.39  
6.38  
6.37  
6.36  
6.35  
6.34  
6.33  
6.32  
6.31  
6.30  
6.29  
6.28  
6.27  
6.26  
6.25  
6.24  
6.23  
6.22  
6.21  
6.20  
6.19  
6.18  
6.17  
6.16  
6.15  
6.14  
6.13  
6.12  
6.11  
6.10  
6.09  
6.08  
6.07  
6.06  
6.05  
6.04  
6.03  
6.02  
6.01  
6.00  
5.99  
5.98  
5.97  
5.96  
5.95  
5.94  
5.93  
5.92  
5.91  
5.90  
5.89  
5.88  
5.87  
5.86  
5.85  
5.84  
5.83  
5.82  
5.81  
5.80  
5.79  
5.78  
5.77  
5.76  
5.75  
5.74  
5.73  
5.72  
5.71  
5.70  
5.69  
5.68  
5.67  
5.66  
5.65  
5.64  
5.63  
5.62  
5.61  
5.60  
5.59  
5.58  
5.57  
5.56  
5.55  
5.54  
5.53  
5.52  
5.51  
5.50  
5.49  
5.48  
5.47  
5.46  
5.45  
5.44  
5.43  
5.42  
5.41  
5.40  
5.39  
5.38  
5.37  
5.36  
5.35  
5.34  
5.33  
5.32  
5.31  
5.30  
5.29  
5.28  
5.27  
5.26  
5.25  
5.24  
5.23  
5.22  
5.21  
5.20  
5.19  
5.18  
5.17  
5.16  
5.15  
5.14  
5.13  
5.12  
5.11  
5.10  
5.09  
5.08  
5.07  
5.06  
5.05  
5.04  
5.03  
5.02  
5.01  
5.00  
4.99  
4.98  
4.97  
4.96  
4.95  
4.94  
4.93  
4.92  
4.91  
4.90  
4.89  
4.88  
4.87  
4.86  
4.85  
4.84  
4.83  
4.82  
4.81  
4.80  
4.79  
4.78  
4.77  
4.76  
4.75  
4.74  
4.73  
4.72  
4.71  
4.70  
4.69  
4.68  
4.67  
4.66  
4.65  
4.64  
4.63  
4.62  
4.61  
4.60  
4.59  
4.58  
4.57  
4.56  
4.55  
4.54  
4.53  
4.52  
4.51  
4.50  
4.49  
4.48  
4.47  
4.46  
4.45  
4.44  
4.43  
4.42  
4.41  
4.40  
4.39  
4.38  
4.37  
4.36  
4.35  
4.34  
4.33  
4.32  
4.31  
4.30  
4.29  
4.28  
4.27  
4.26  
4.25  
4.24  
4.23  
4.22  
4.21  
4.20  
4.19  
4.18  
4.17  
4.16  
4.15  
4.14  
4.13  
4.12  
4.11  
4.10  
4.09  
4.08  
4.07  
4.06  
4.05  
4.04  
4.03  
4.02  
4.01  
4.00  
3.99  
3.98  
3.97  
3.96  
3.95  
3.94  
3.93  
3.92  
3.91  
3.90  
3.89  
3.88  
3.87  
3.86  
3.85  
3.84  
3.83  
3.82  
3.81  
3.80  
3.79  
3.78  
3.77  
3.76  
3.75  
3.74  
3.73  
3.72  
3.71  
3.70  
3.69  
3.68  
3.67  
3.66  
3.65  
3.64  
3.63  
3.62  
3.61  
3.60  
3.59  
3.58  
3.57  
3.56  
3.55  
3.54  
3.53  
3.52  
3.51  
3.50  
3.49  
3.48  
3.47  
3.46  
3.45  
3.44  
3.43  
3.42  
3.41  
3.40  
3.39  
3.38  
3.37  
3.36  
3.35  
3.34  
3.33  
3.32  
3.31  
3.30  
3.29  
3.28  
3.27  
3.26  
3.25  
3.24  
3.23  
3.22  
3.21  
3.20  
3.19  
3.18  
3.17  
3.16  
3.15  
3.14  
3.13  
3.12  
3.11  
3.10  
3.09  
3.08  
3.07  
3.06  
3.05  
3.04  
3.03  
3.02  
3.01  
3.00  
2.99  
2.98  
2.97  
2.96  
2.95  
2.94  
2.93  
2.92  
2.91  
2.90  
2.89  
2.88  
2.87  
2.86  
2.85  
2.84  
2.83  
2.82  
2.81  
2.80  
2.79  
2.78  
2.77  
2.76  
2.75  
2.74  
2.73  
2.72  
2.71  
2.70  
2.69  
2.68  
2.67  
2.66  
2.65  
2.64  
2.63  
2.62  
2.61  
2.60  
2.59  
2.58  
2.57  
2.56  
2.55  
2.54  
2.53  
2.52  
2.51  
2.50  
2.49  
2.48  
2.47  
2.46  
2.45  
2.44  
2.43  
2.42  
2.41  
2.40  
2.39  
2.38  
2.37  
2.36  
2.35  
2.34  
2.33  
2.32  
2.31  
2.30  
2.29  
2.28  
2.27  
2.26  
2.25  
2.24  
2.23  
2.22  
2.21  
2.20  
2.19  
2.18  
2.17  
2.16  
2.15  
2.14  
2.13  
2.12  
2.11  
2.10  
2.09  
2.08  
2.07  
2.06  
2.05  
2.04  
2.03  
2.02  
2.01  
2.00  
1.99  
1.98  
1.97  
1.96  
1.95  
1.94  
1.93  
1.92  
1.91  
1.90  
1.89  
1.88  
1.87  
1.86  
1.85  
1.84  
1.83  
1.82  
1.81  
1.80  
1.79  
1.78  
1.77  
1.76  
1.75  
1.74  
1.73  
1.72  
1.71  
1.70  
1.69  
1.68  
1.67  
1.66  
1.65  
1.64  
1.63  
1.62  
1.61  
1.60  
1.59  
1.58  
1.57  
1.56  
1.55  
1.54  
1.53  
1.52  
1.51  
1.50  
1.49  
1.48  
1.47  
1.46  
1.45  
1.44  
1.43  
1.42  
1.41  
1.40  
1.39  
1.38  
1.37  
1.36  
1.35  
1.34  
1.33  
1.32  
1.31  
1.30  
1.29  
1.28  
1.27  
1.26  
1.25  
1.24  
1.23  
1.22  
1.21  
1.20  
1.19  
1.18  
1.17  
1.16  
1.15  
1.14  
1.13  
1.12  
1.11  
1.10  
1.09  
1.08  
1.07  
1.06  
1.05  
1.04  
1.03  
1.02  
1.01  
1.00  
0.99  
0.98  
0.97  
0.96  
0.95  
0.94  
0.93  
0.92  
0.91  
0.90  
0.89  
0.88  
0.87  
0.86  
0.85  
0.84  
0.83  
0.82  
0.81  
0.80  
0.79  
0.78  
0.77  
0.76  
0.75  
0.74  
0.73  
0.72  
0.71  
0.70  
0.69  
0.68  
0.67  
0.66  
0.65  
0.64  
0.63  
0.62  
0.61  
0.60  
0.59  
0.58  
0.57  
0.56  
0.55  
0.54  
0.53  
0.52  
0.51  
0.50  
0.49  
0.48  
0.47  
0.46  
0.45  
0.44  
0.43  
0.42  
0.41  
0.40  
0.39  
0.38  
0.37  
0.36  
0.35  
0.34  
0.33  
0.32  
0.31  
0.30  
0.29  
0.28  
0.27  
0.26  
0.25  
0.24  
0.23  
0.22  
0.21  
0.20  
0.19  
0.18  
0.17  
0.16  
0.15  
0.14  
0.13  
0.12  
0.11  
0.10  
0.09  
0.08  
0.07  
0.06  
0.05  
0.04  
0.03  
0.02  
0.01  
0.00

5.19  
5.19  
5.17  
5.17

3.40  
3.39  
3.36  
3.36

3.00  
2.98  
2.96  
2.94

2.44  
2.42

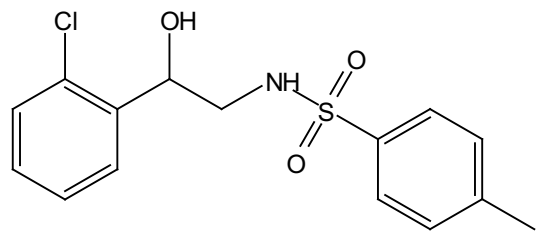

3w

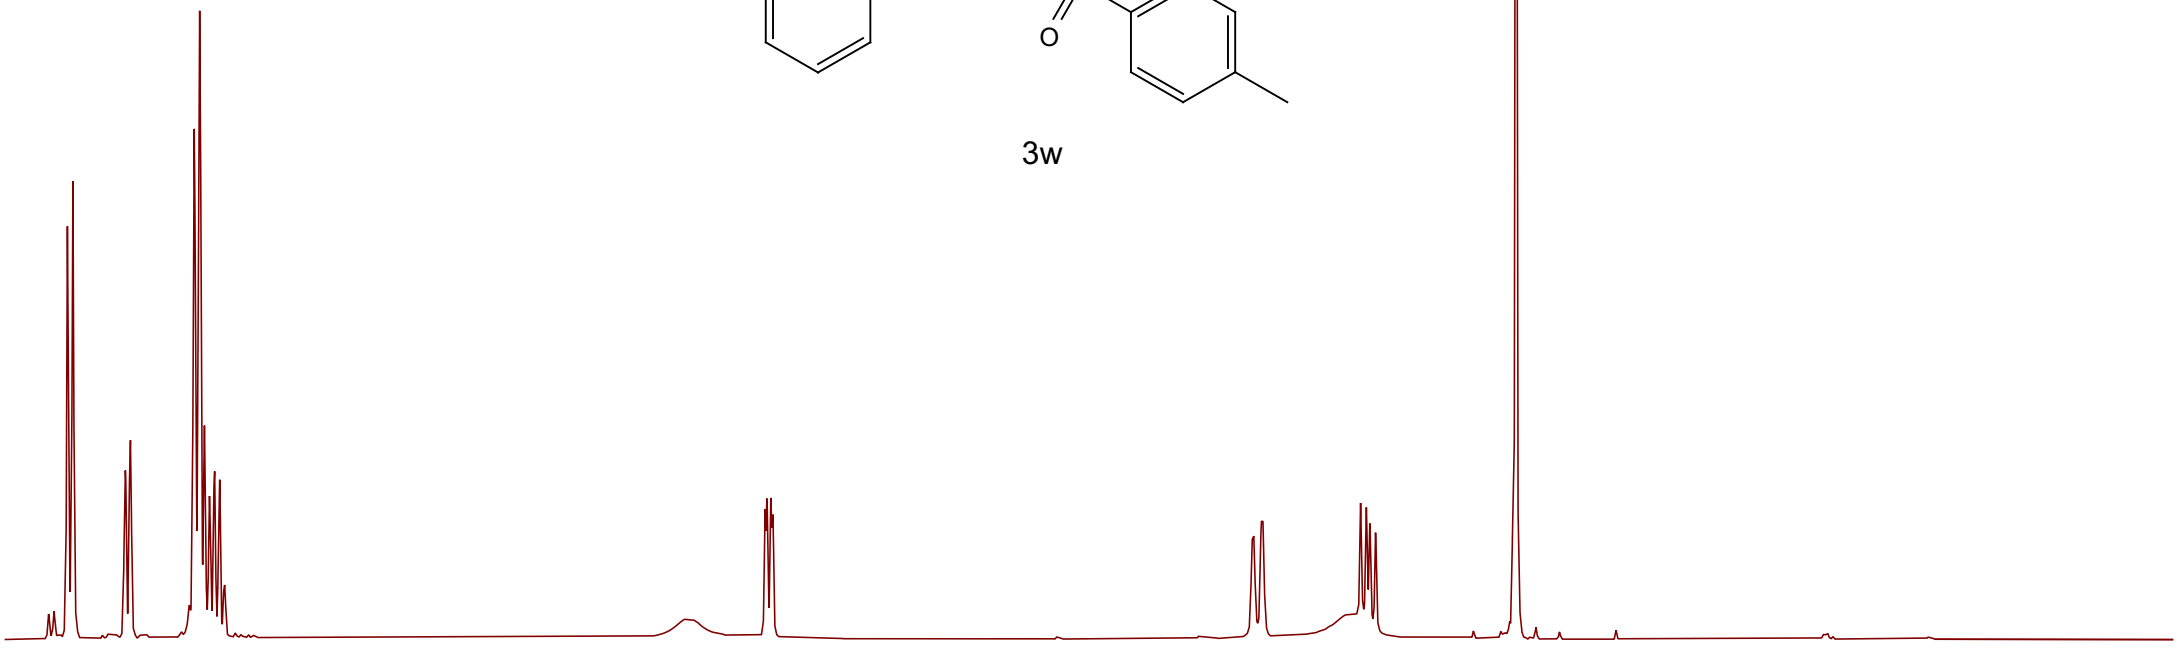

2  
1  
5

1

1

2

3

f1 (ppm)

143.67  
143.66  
138.19  
136.58  
131.64  
129.82  
129.40  
129.09  
127.48  
127.46  
127.19

77.41  
77.09  
76.77  
69.48

48.35

21.56

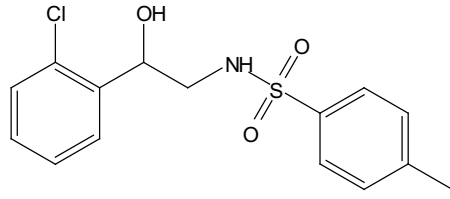

3w



pdata/1  
RAM-99B-TT-20-REDO

5.79  
5.77  
5.76  
5.75

5.16  
5.15  
5.14  
5.13

3.89  
3.88  
3.87  
3.86  
3.82  
3.80  
3.80  
3.79

2.42

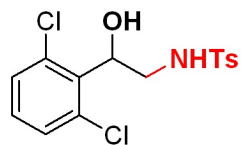

3x

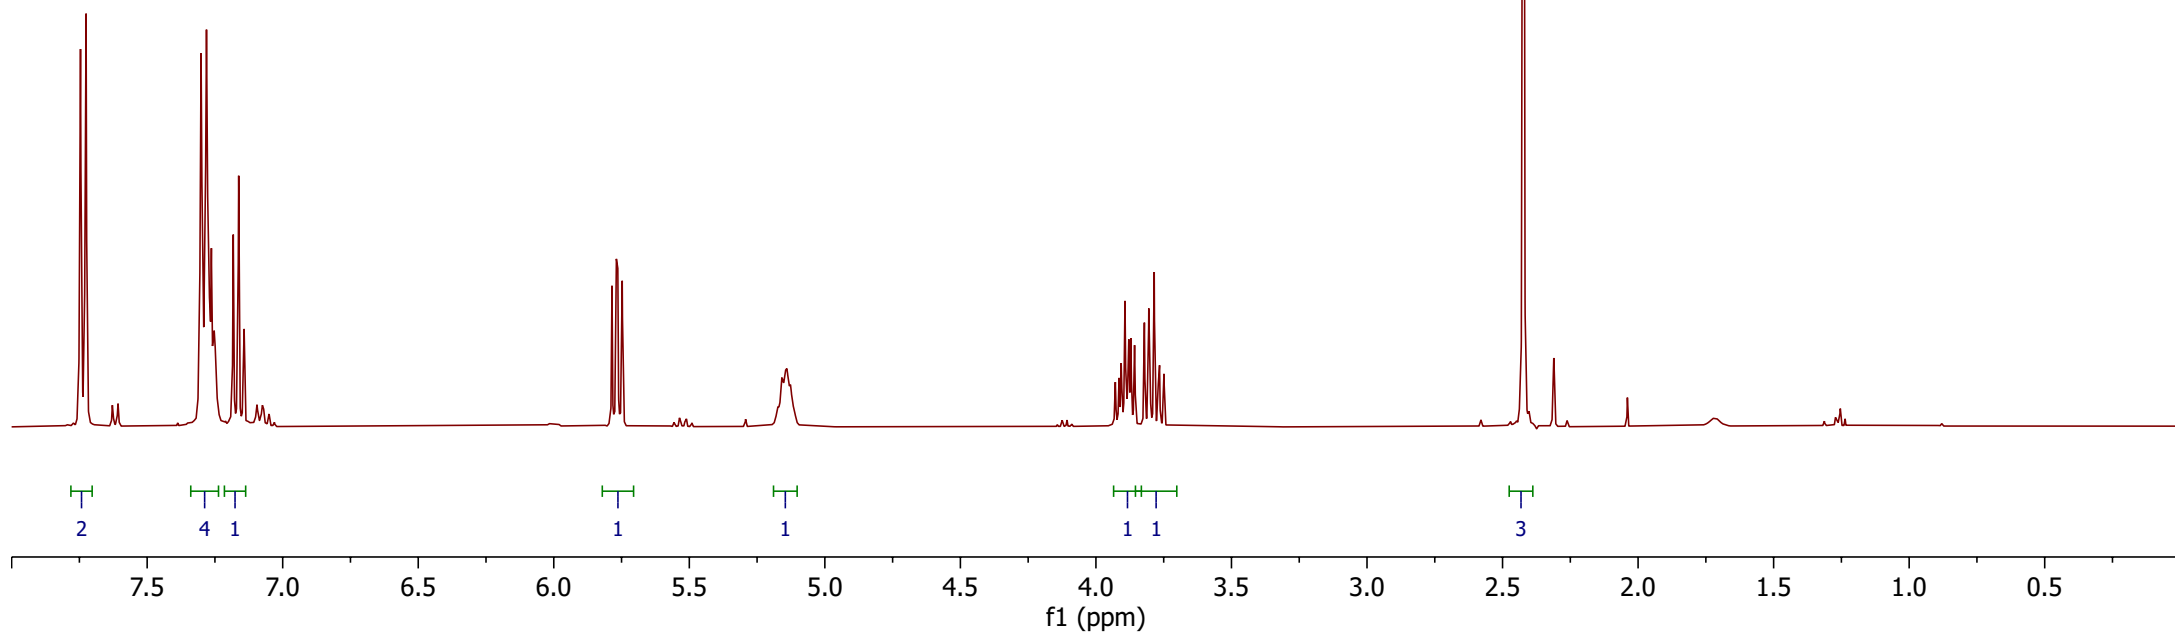

pdata/1  
RAM-99B-TT20-REDO

143.67  
143.66  
136.93  
136.92  
132.04  
130.58  
130.34  
129.78  
129.77  
126.98

77.32  
77.00  
76.68

56.27

46.07

21.48

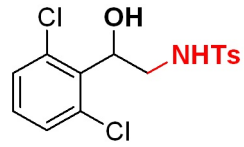

3x

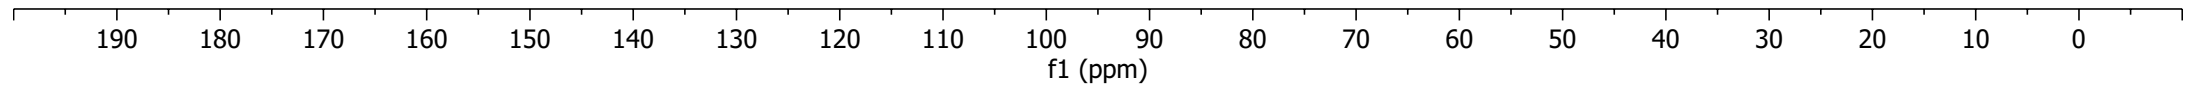

pdata/1  
RAM-99D-88

5.09  
5.07  
4.97  
4.95  
4.94

3.47  
3.46  
3.45  
3.44  
3.44  
3.43  
3.41

2.43

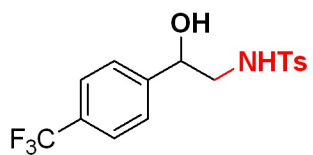

3y

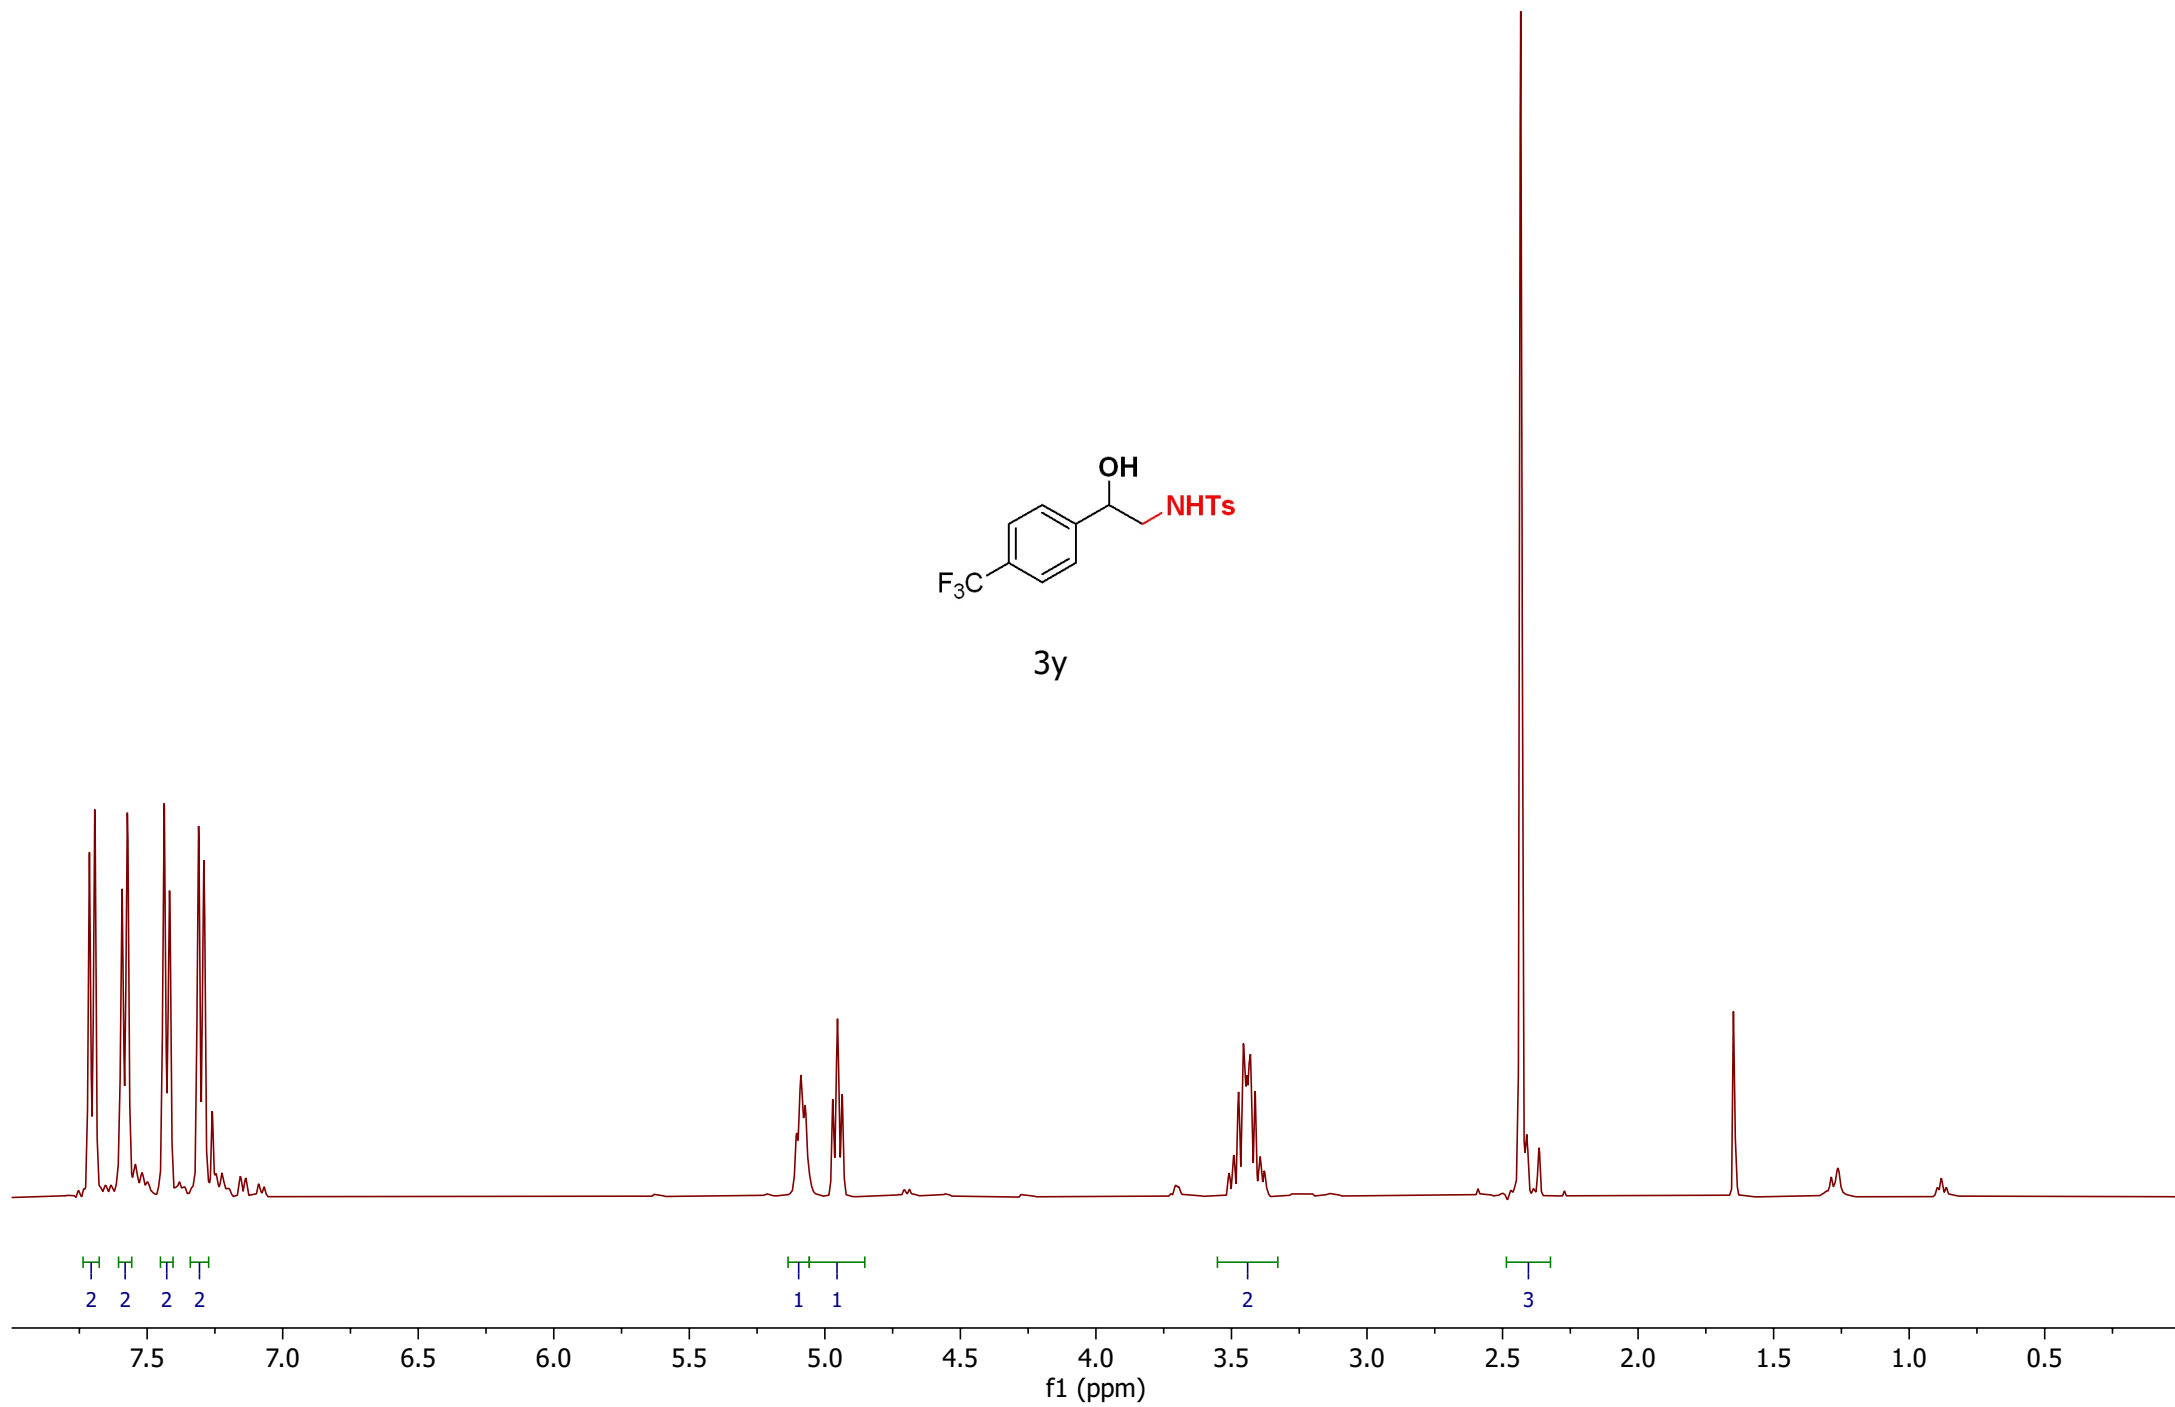

pdata/1  
RAM-99D-88

144.03  
144.00  
141.76  
136.74  
131.31  
130.99  
130.66  
130.25  
129.93  
129.93  
129.79  
128.19  
127.78  
127.20  
127.16  
127.13  
127.06  
127.05  
127.02  
126.95  
126.90  
125.93  
125.89  
125.85  
125.78

77.37  
77.25  
77.05  
76.73

60.64

50.25

21.54  
21.51  
21.48

190 180 170 160 150 140 130 120 110 100 90 80 70 60 50 40 30 20 10 0

f1 (ppm)

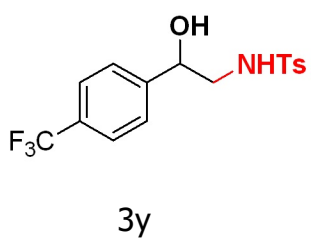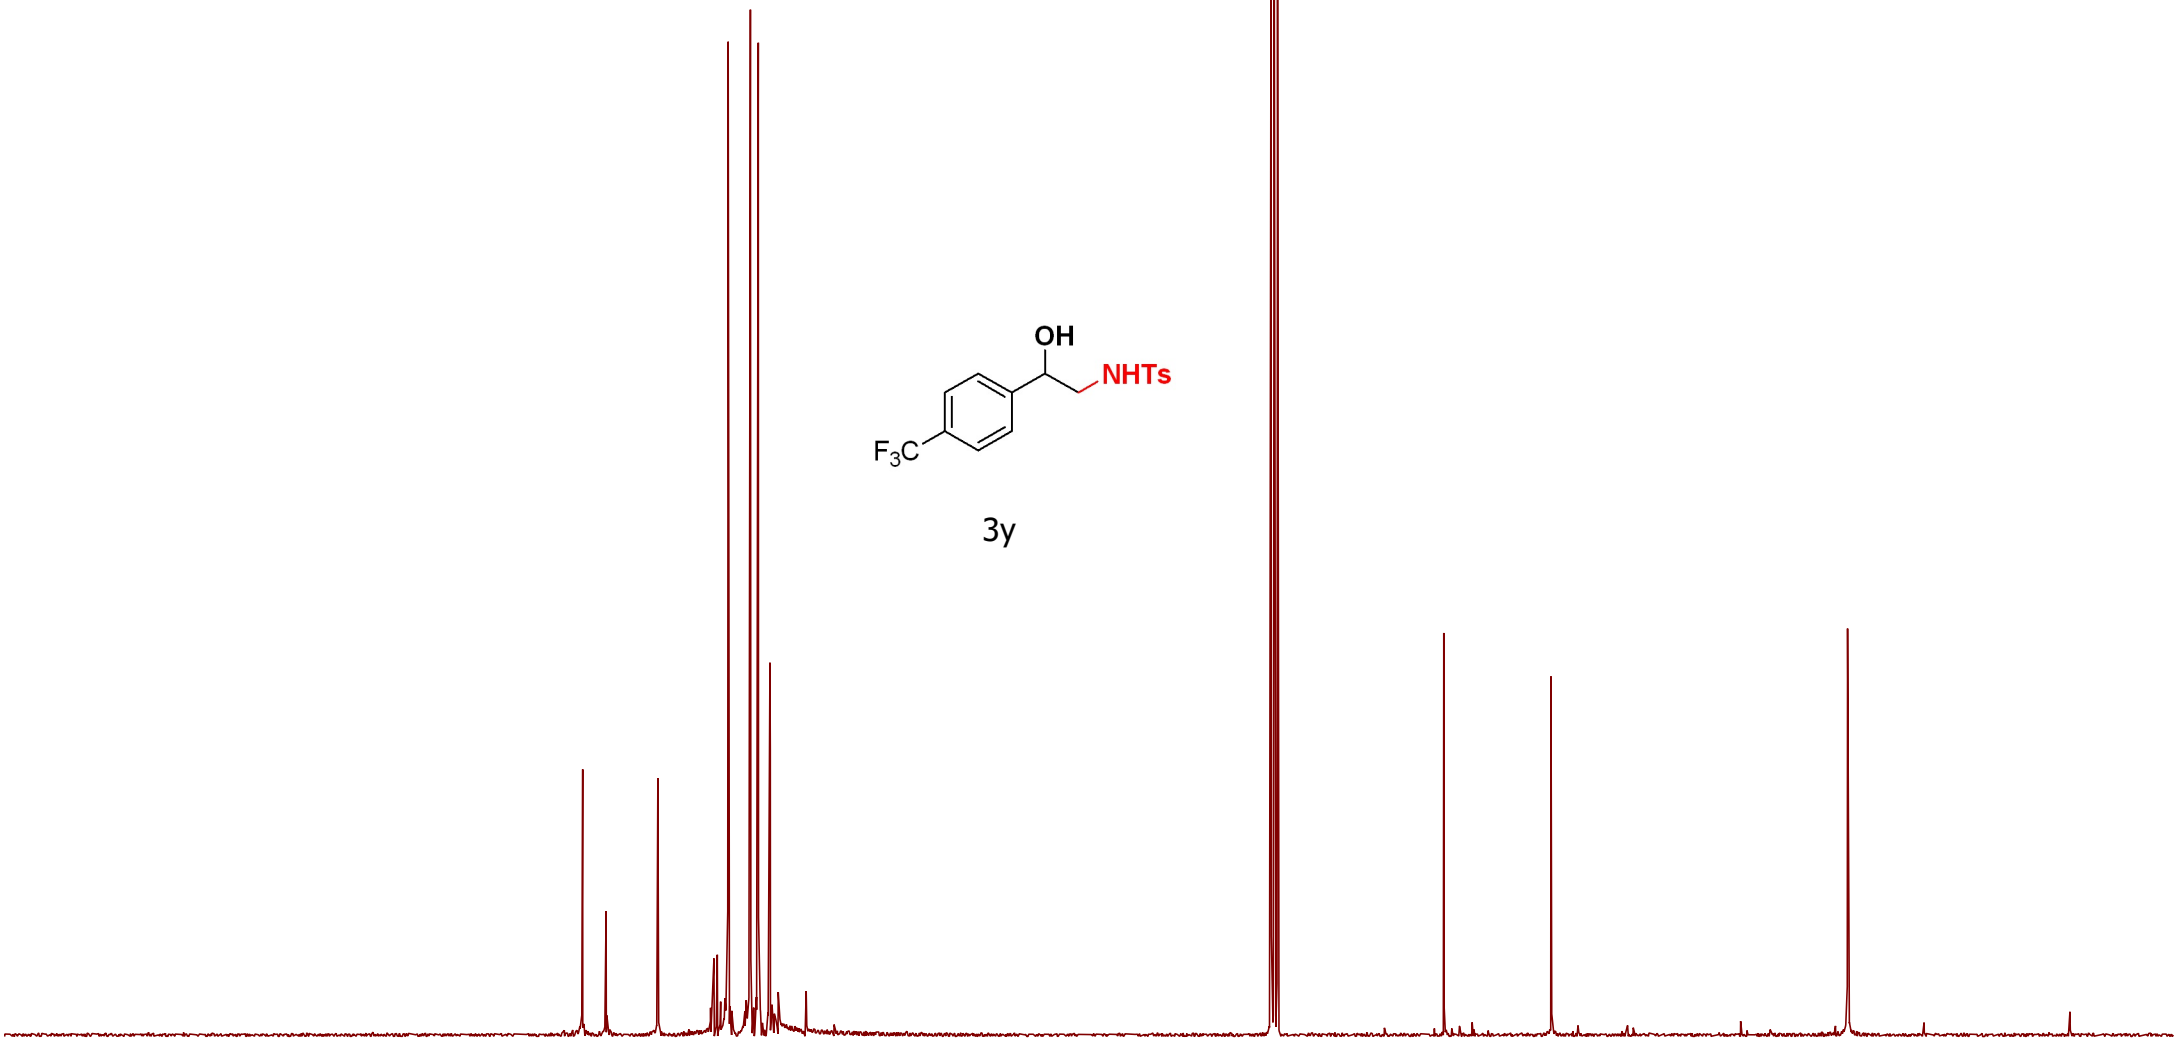

pdata1

5.27  
5.26  
5.25  
5.24  
4.86  
4.85  
4.84  
4.83  
4.82

3.20  
3.19  
3.18  
3.17  
3.17  
3.16  
3.15  
3.14  
2.95  
2.93  
2.92  
2.91  
2.90  
2.89  
2.88  
2.36

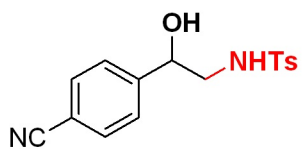

3z

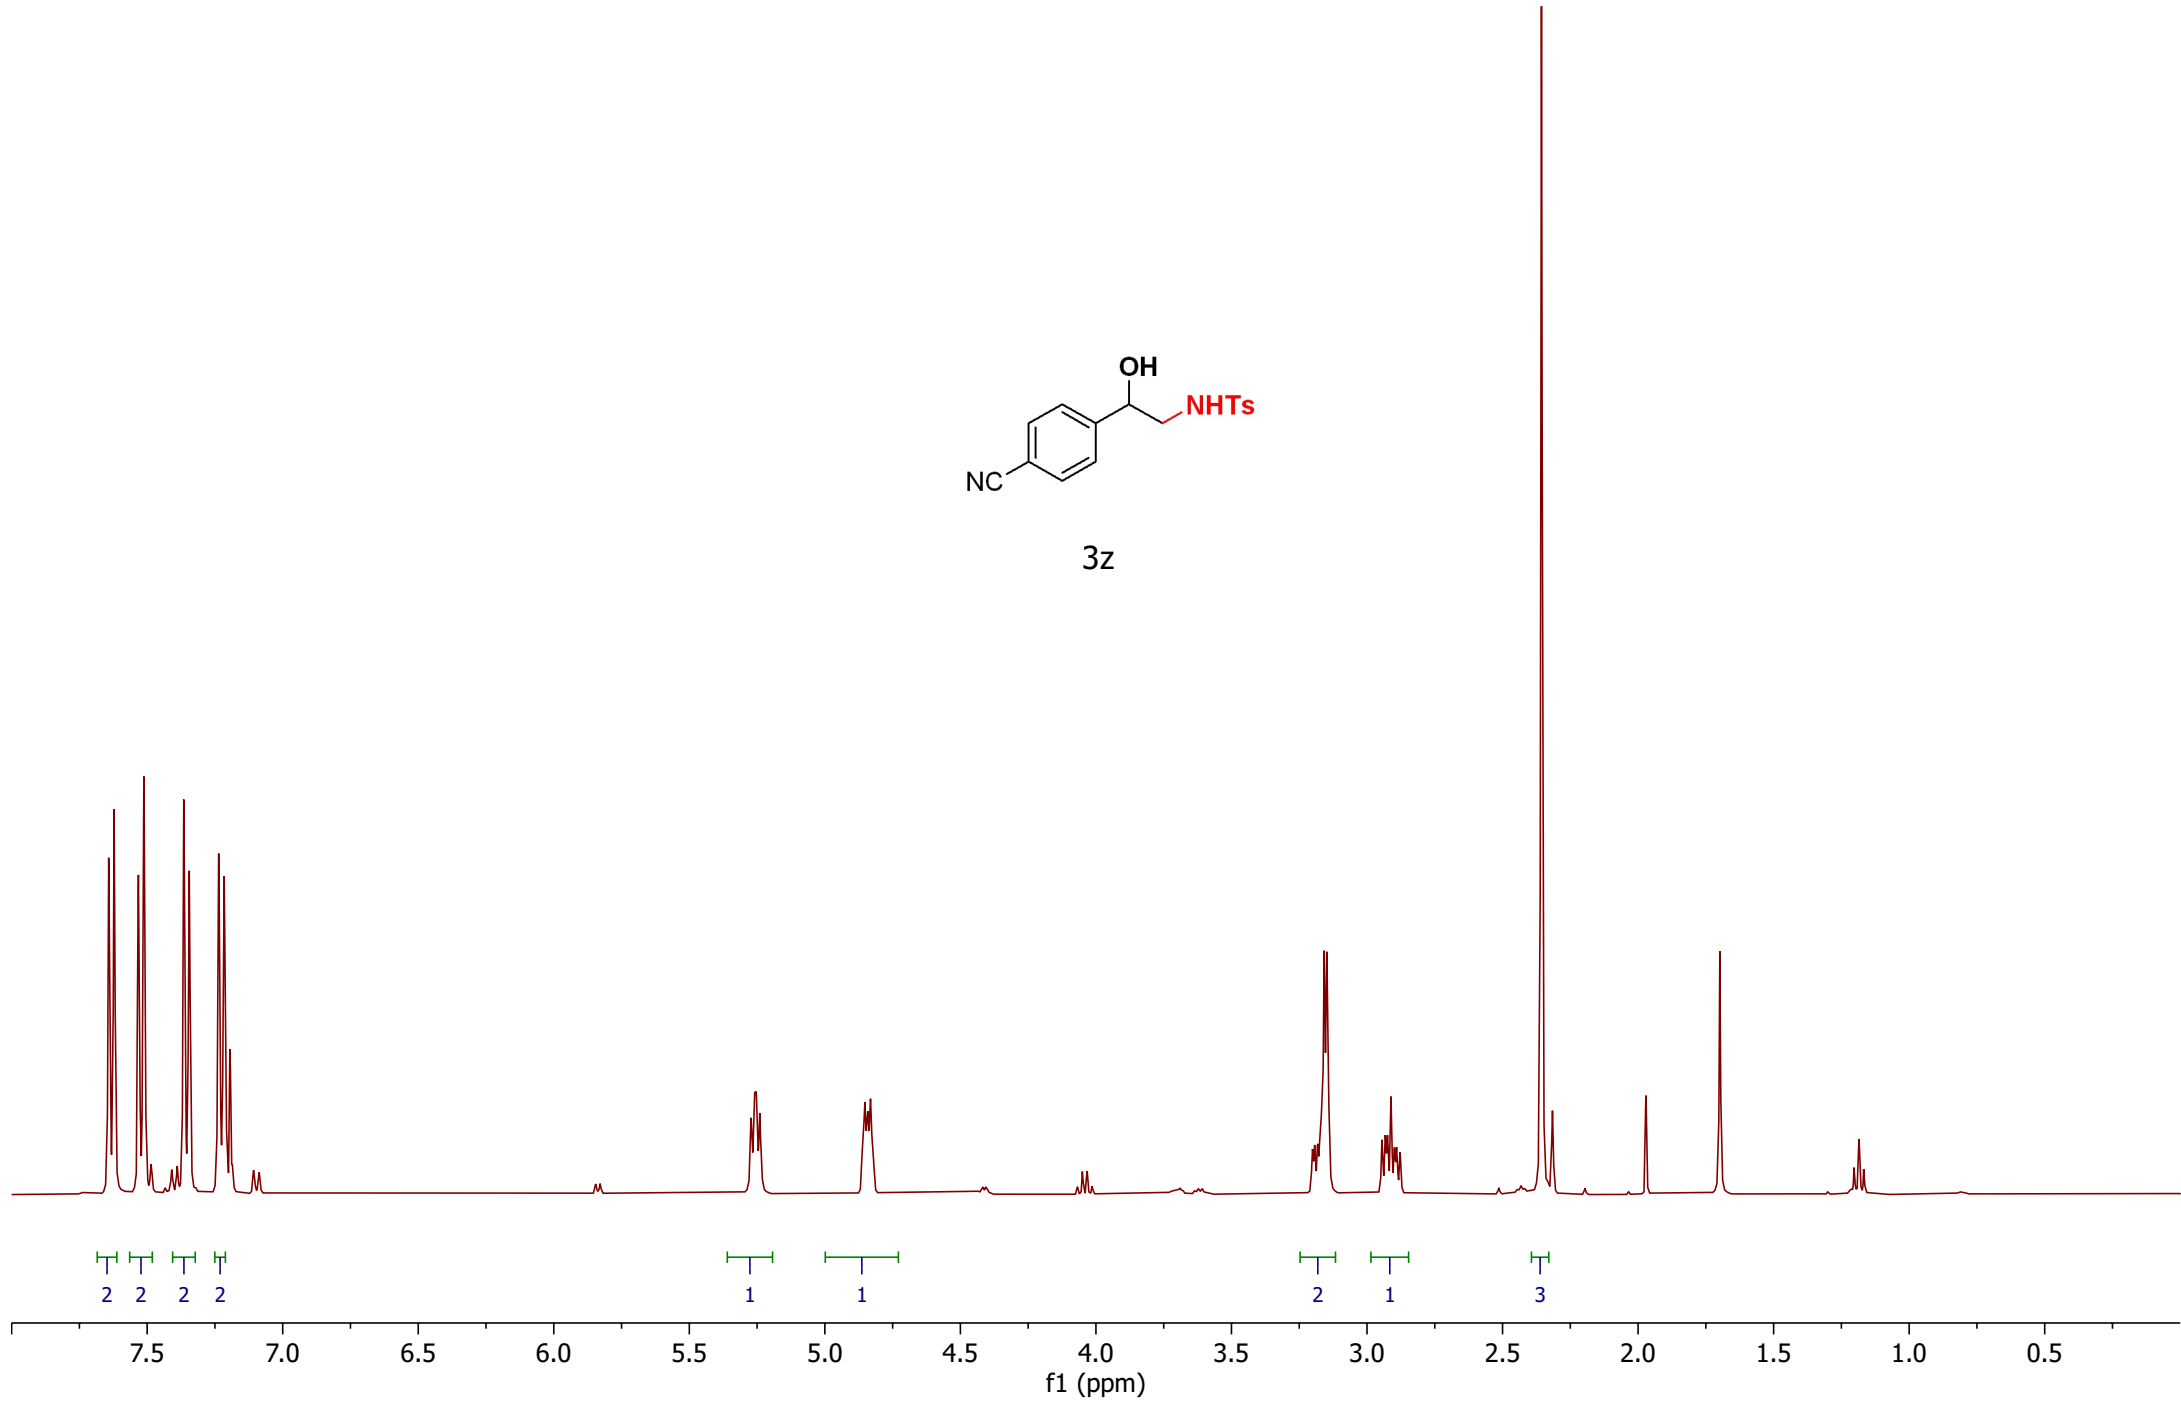



pdata/1

146.12  
144.02  
144.02  
136.31  
132.41  
132.38  
129.94  
129.93  
127.12  
127.04  
127.00  
126.67  
126.66  
118.63

111.81

72.18

50.03

21.60

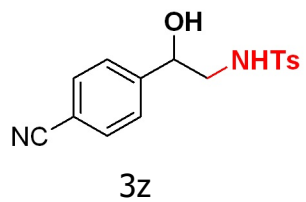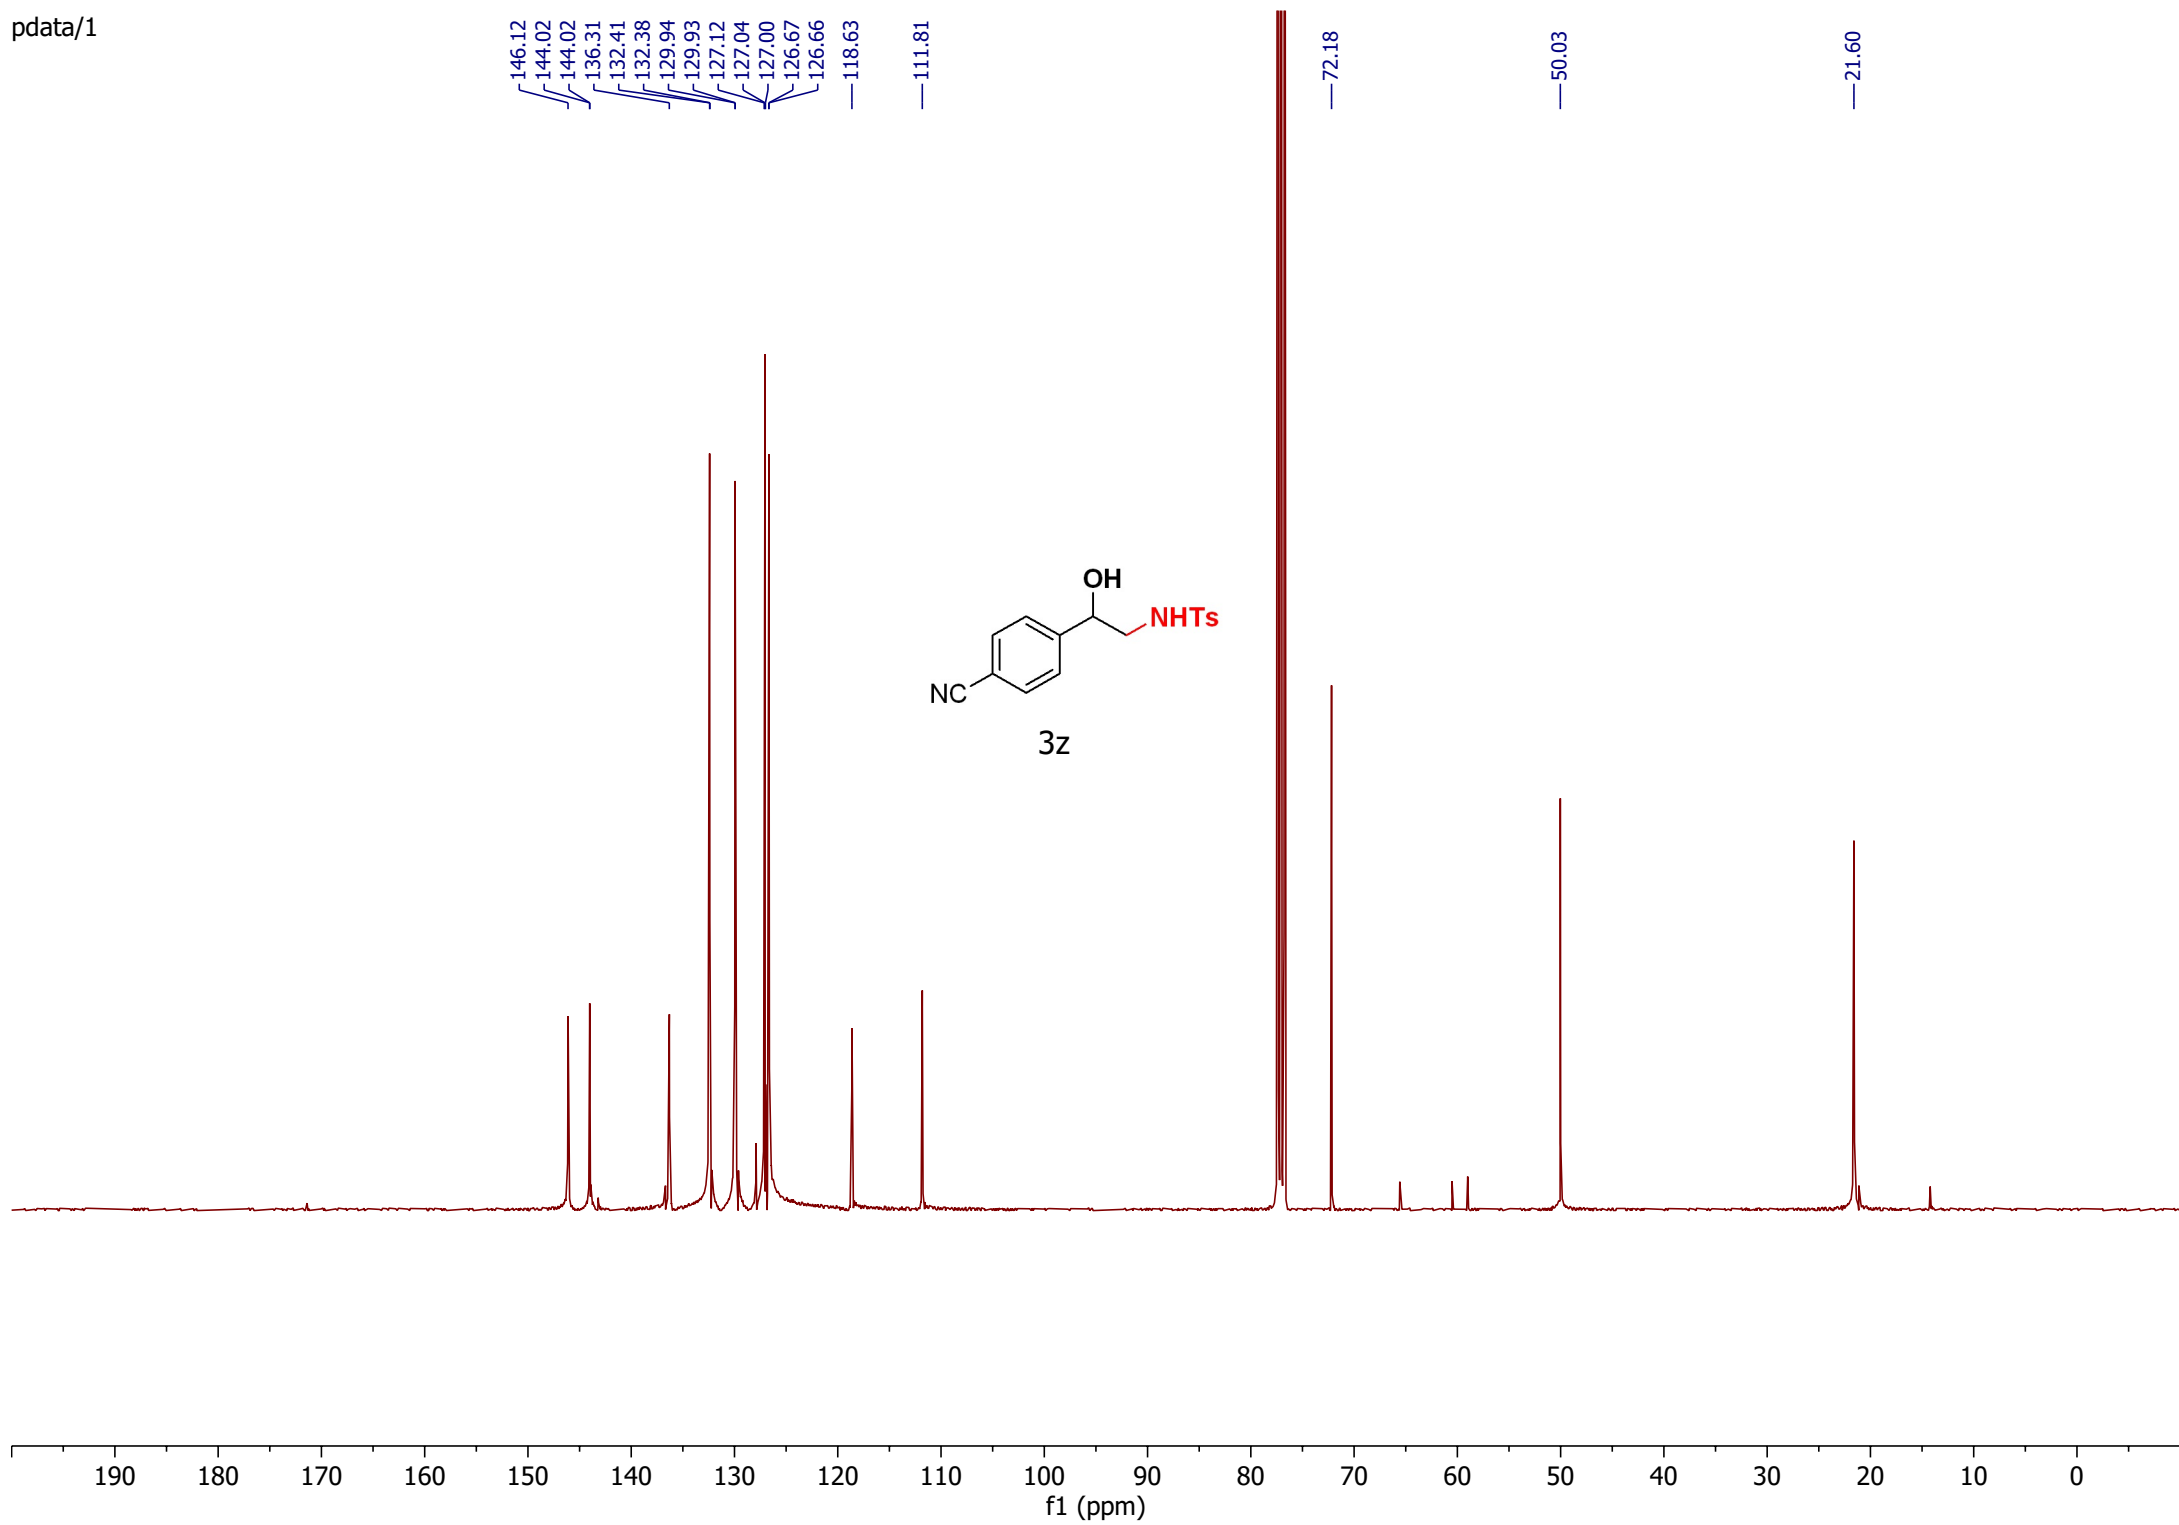

pdata/

7.67  
7.67  
7.47  
7.45  
7.28  
7.26  
7.23  
7.23

4.99  
4.97  
4.96  
4.95  
4.94  
4.93

3.29  
3.28  
3.27  
3.26  
3.25  
3.24  
3.23  
3.02  
3.01  
3.00  
2.99  
2.98  
2.97  
2.96  
2.39

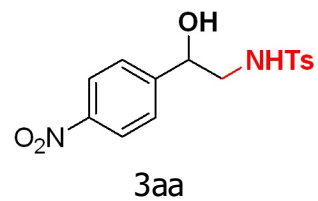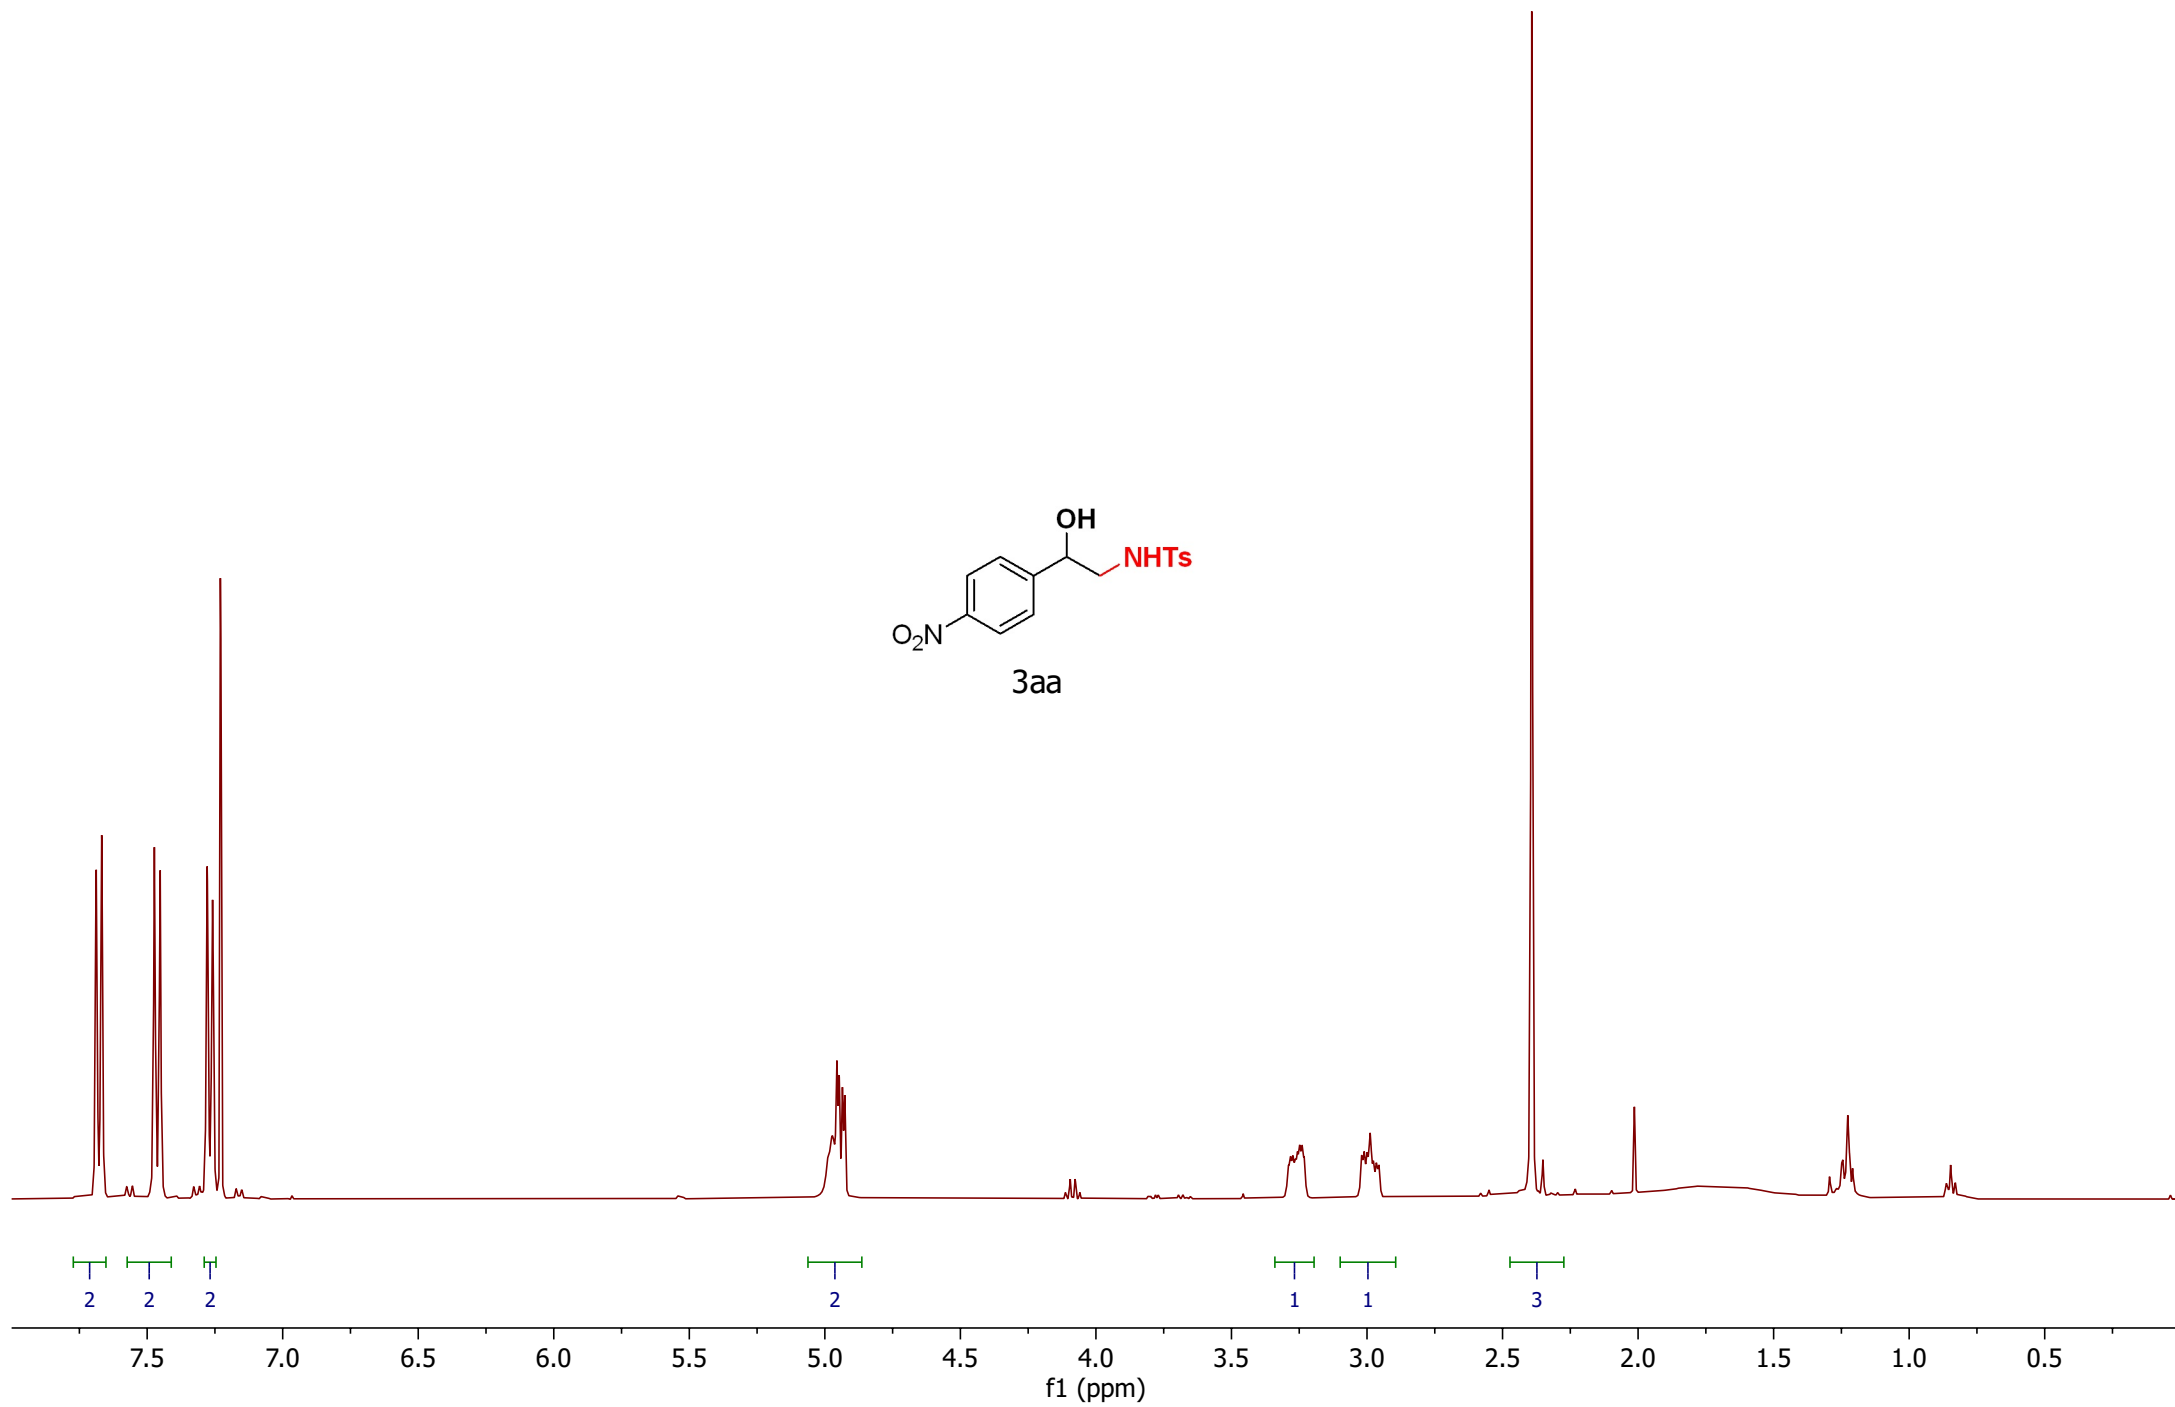

147.91  
147.68  
144.05  
144.03  
136.39  
136.36  
129.94  
129.93  
129.88  
127.08  
127.06  
126.79  
123.86  
123.84  
123.65

72.13

50.03

21.59  
21.58

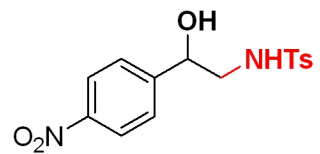

3aa

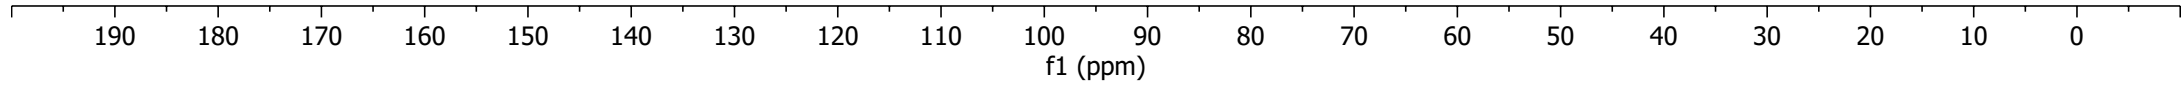

pdata/1

7.58  
7.56  
7.28  
7.26  
7.24  
7.22  
7.21  
7.20  
7.18  
7.17  
7.16  
7.15

5.03  
5.02  
5.01  
5.00

3.13  
3.11  
3.10  
3.08  
3.03  
3.02  
3.00  
2.98

2.54  
2.33  
2.32

1.45

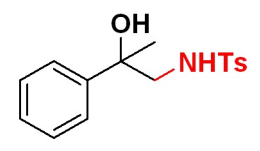

3ab

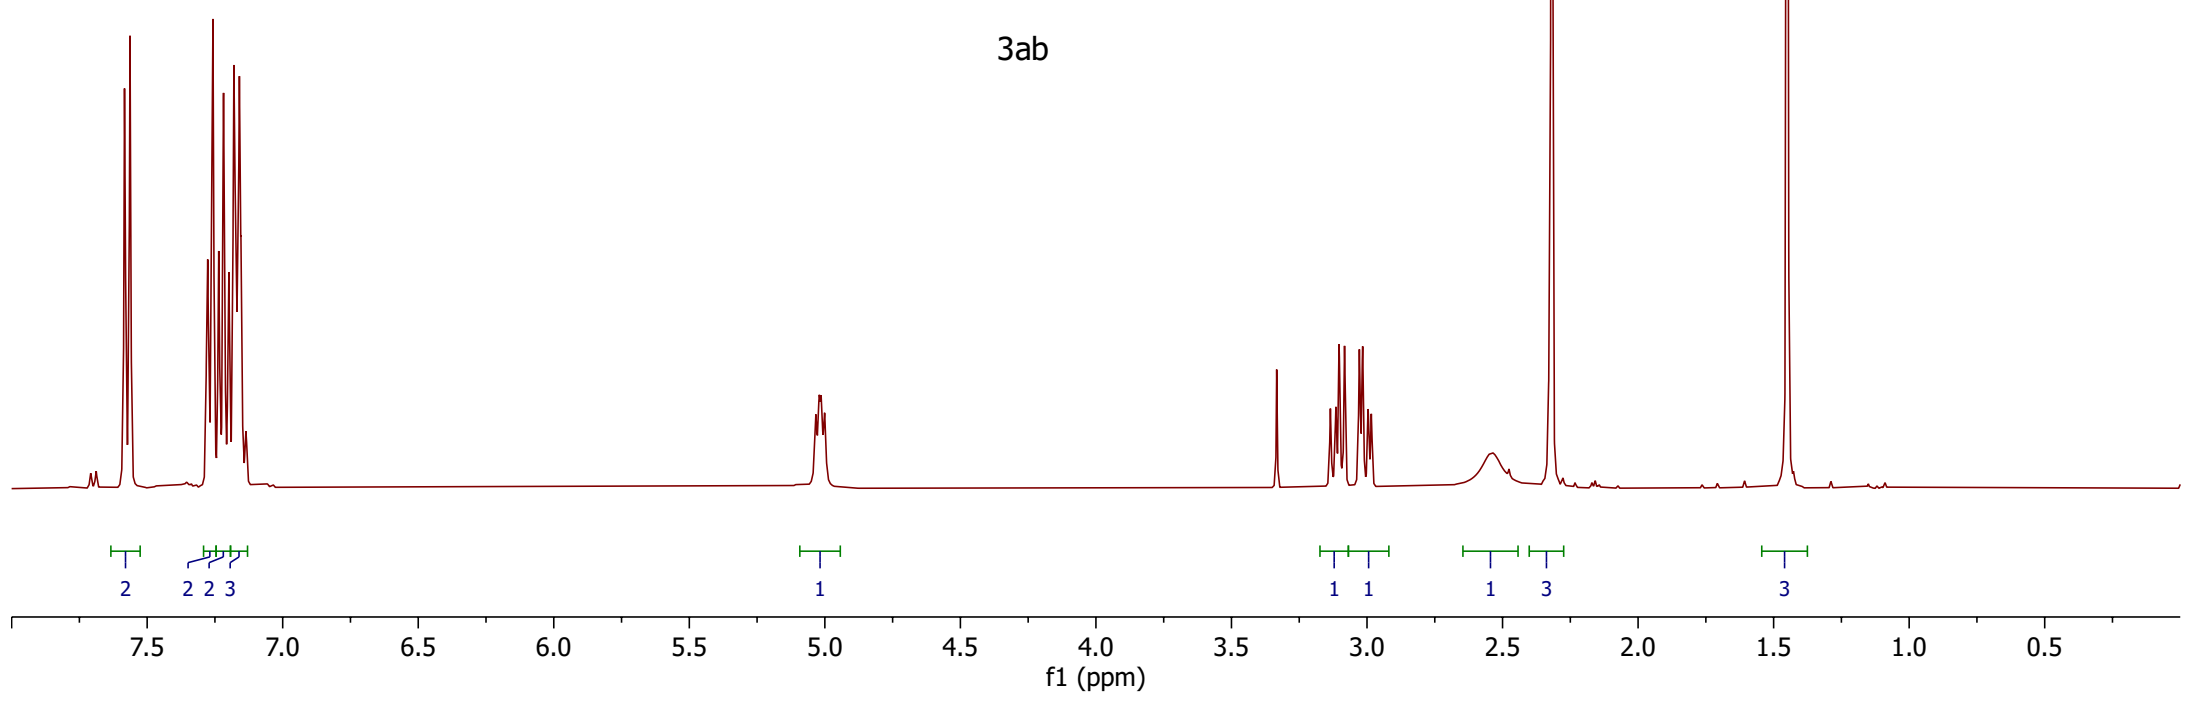

144.92  
143.58  
136.52  
129.81  
128.53  
127.35  
127.06  
124.88  
73.74  
53.81  
27.38  
21.57

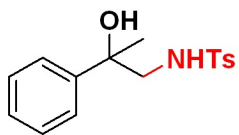

3ab

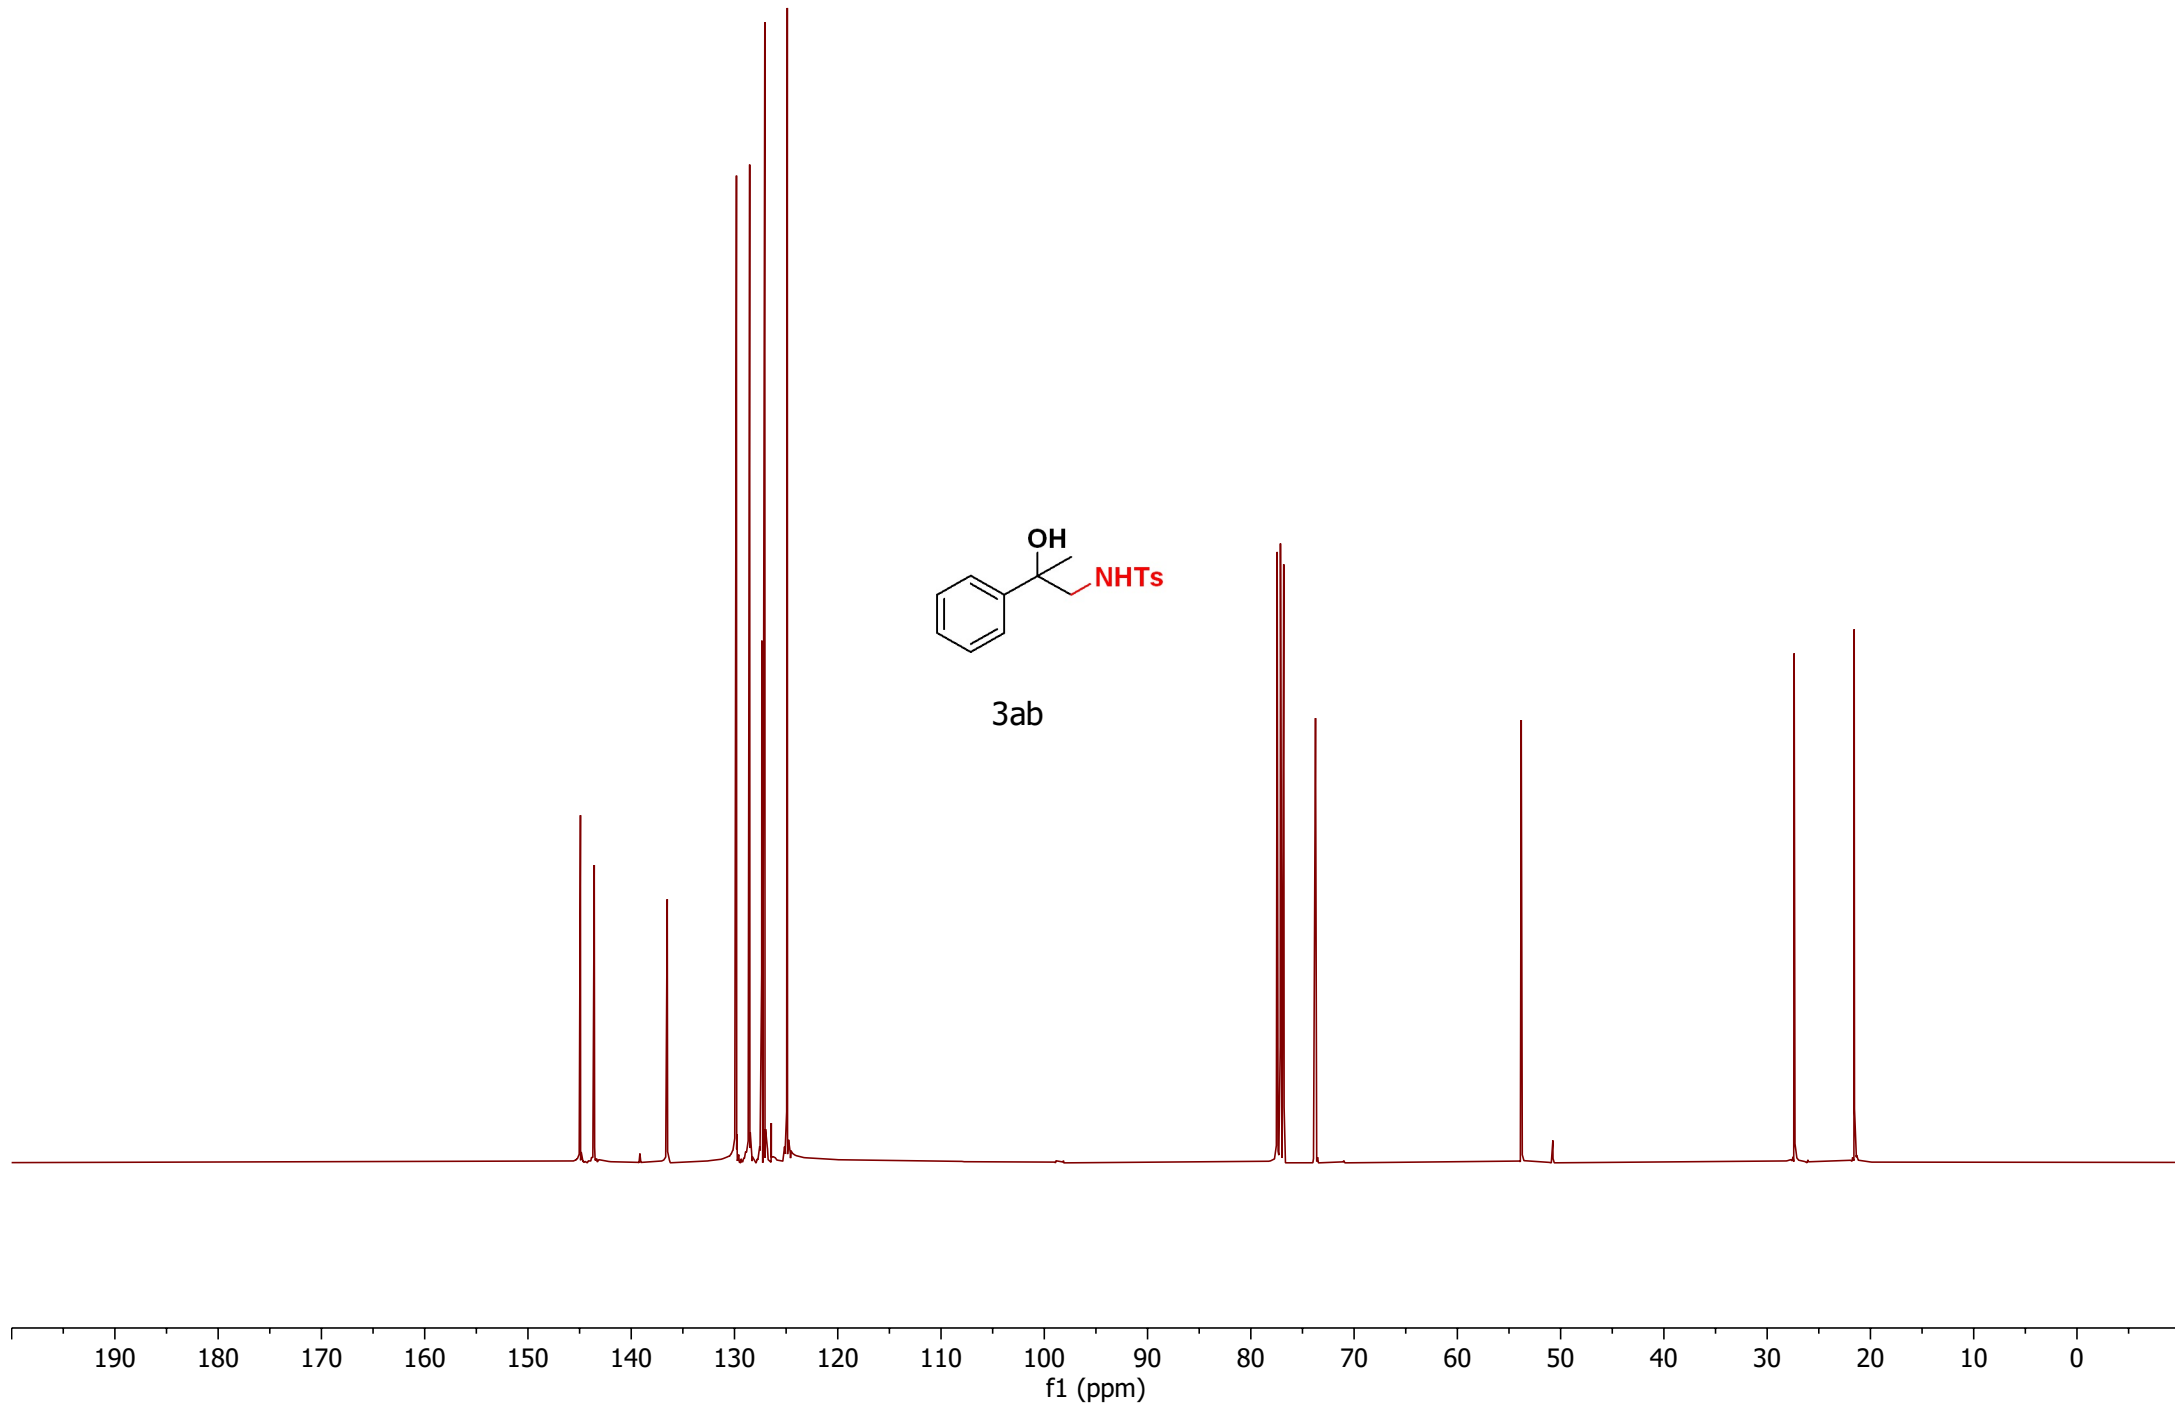

GMF\_Ox\_A4DM6\_170513.r

4.91  
4.90  
4.89  
4.87

3.24  
3.22  
3.20  
3.18  
3.13  
3.12  
3.10  
3.08

2.44  
2.34

1.55

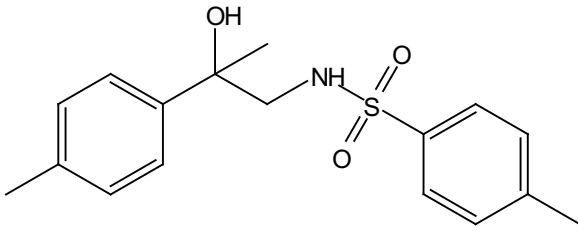

3ac

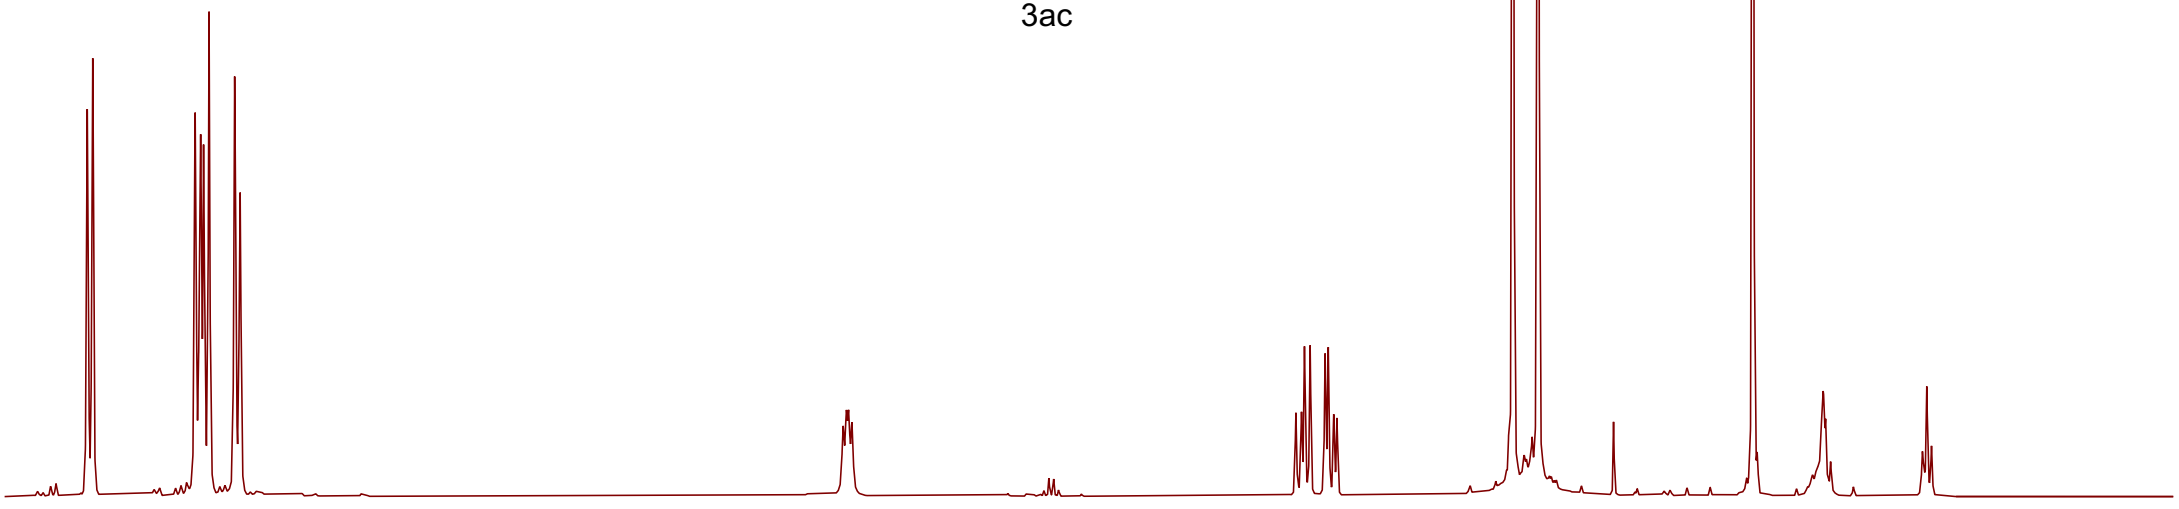

2  
4  
2  
1  
1  
1  
4  
4  
3

7.5 7.0 6.5 6.0 5.5 5.0 4.5 4.0 3.5 3.0 2.5 2.0 1.5 1.0 0.5

f1 (ppm)

143.53  
141.88  
137.09  
136.60  
129.77  
129.24  
127.07  
127.06  
124.77

77.40  
77.08  
76.76  
73.61

53.87

27.43

21.55  
20.98

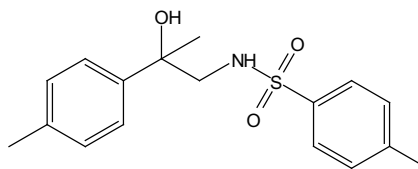

3ac

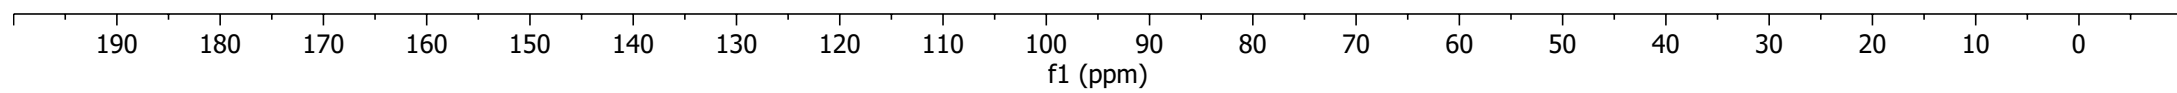

pdata/1

7.59  
7.57  
7.18  
7.18  
7.17  
7.15  
7.13

5.13  
5.11

4.39  
4.38  
4.37  
4.37  
4.36

3.35  
3.33  
3.31  
3.30

2.93  
2.92

2.32

0.85  
0.83

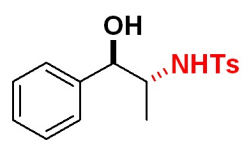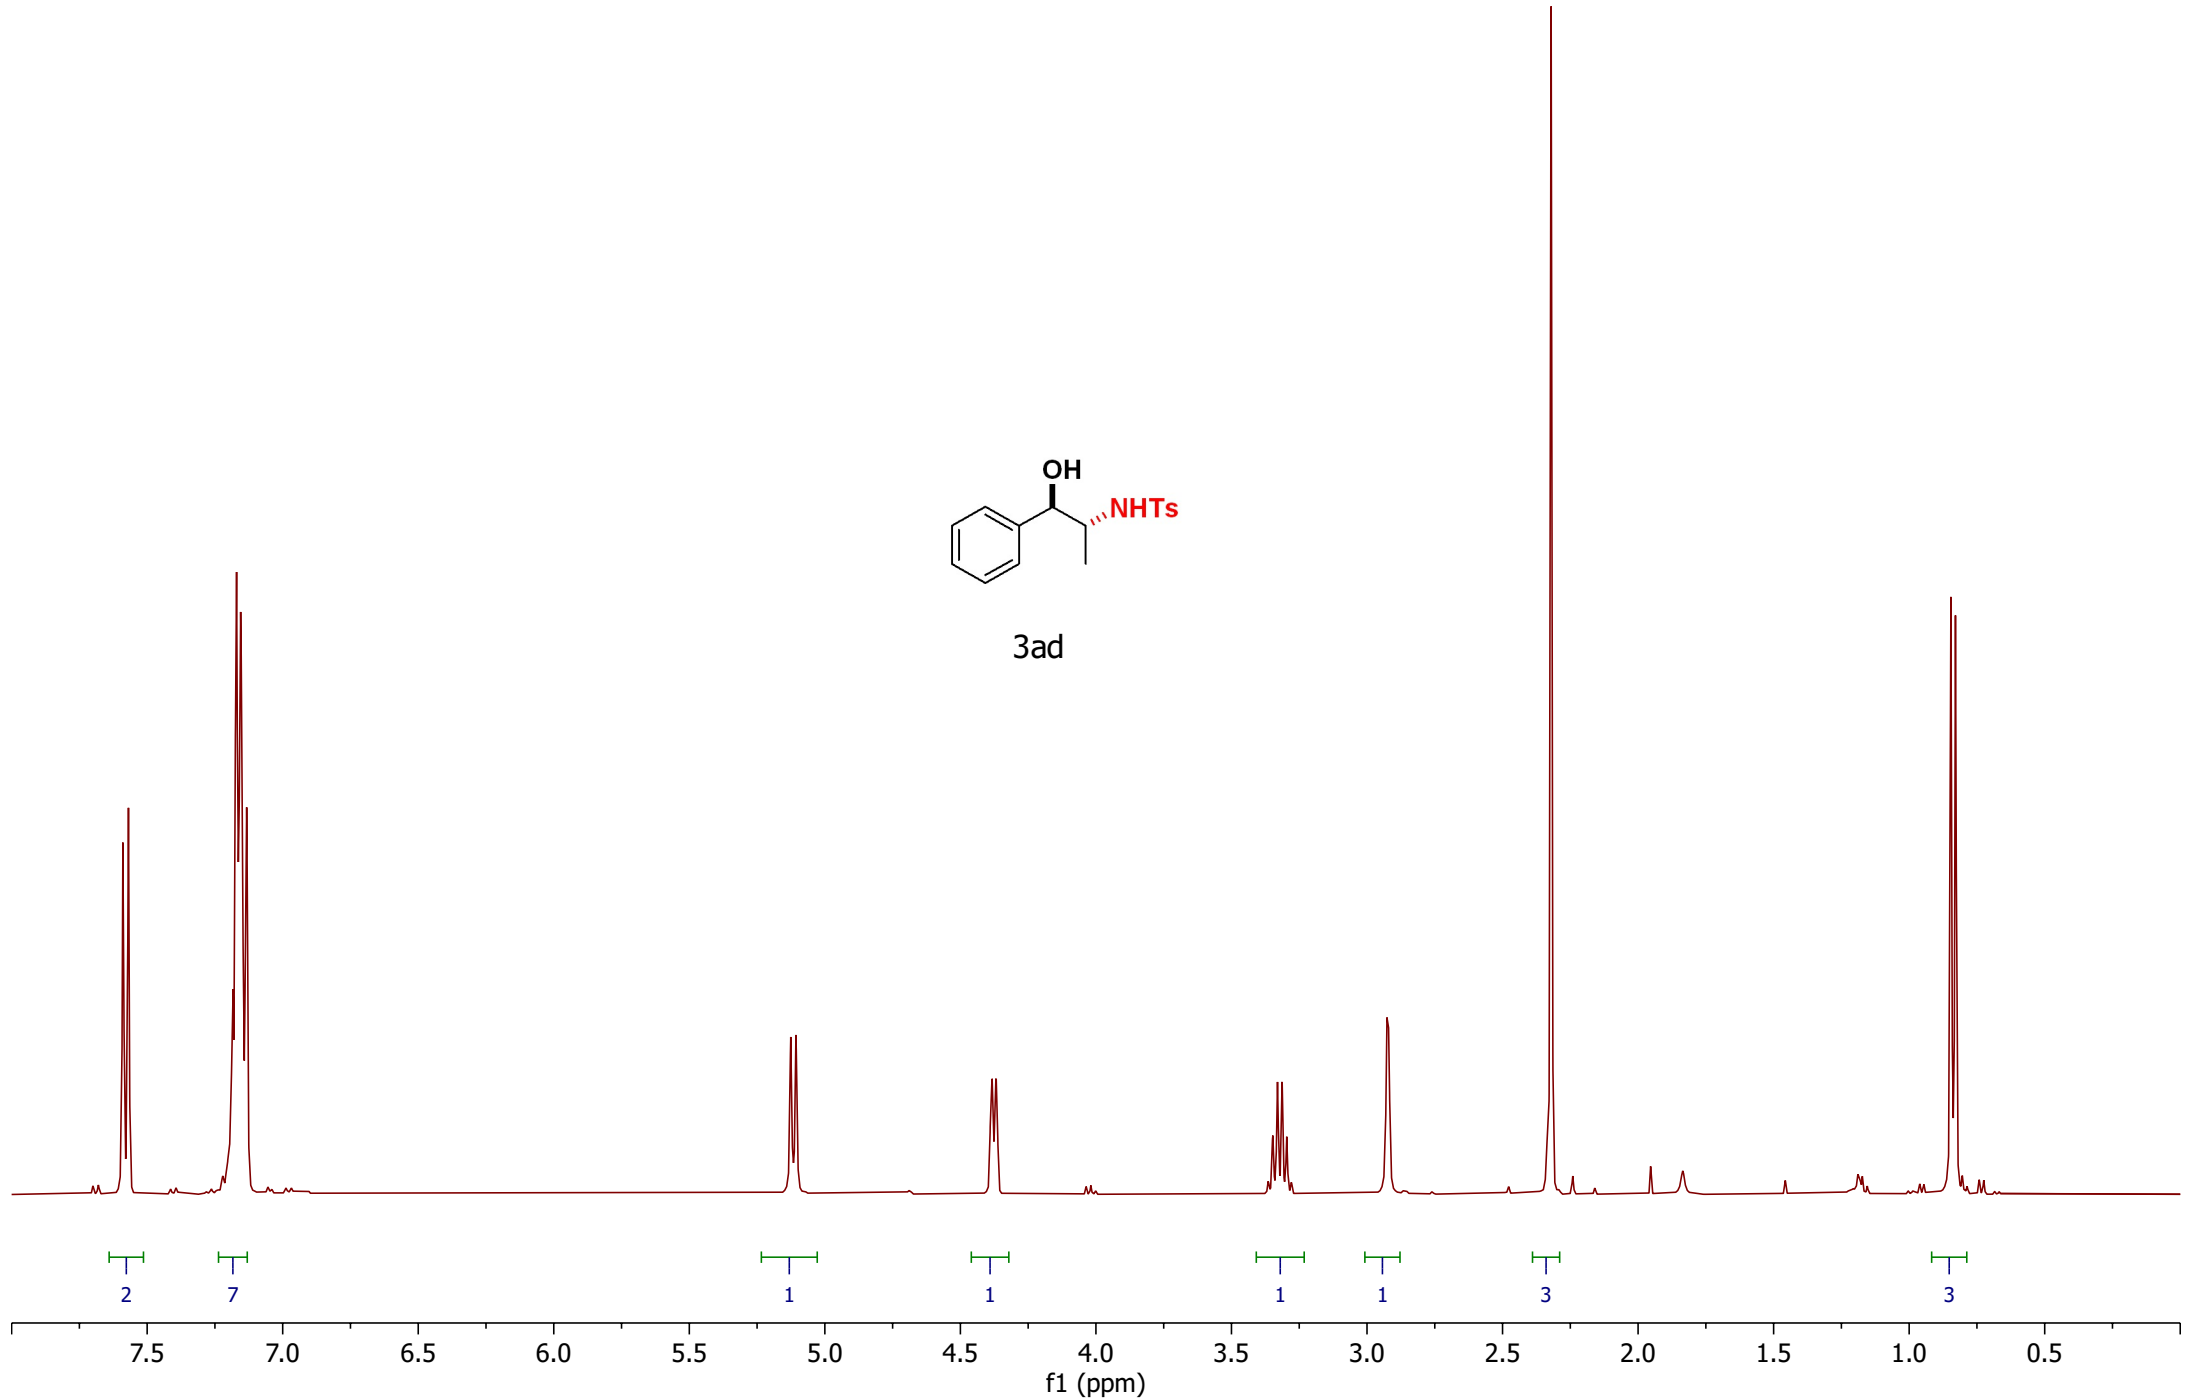

2

7

1

1

1

1

3

3

f1 (ppm)



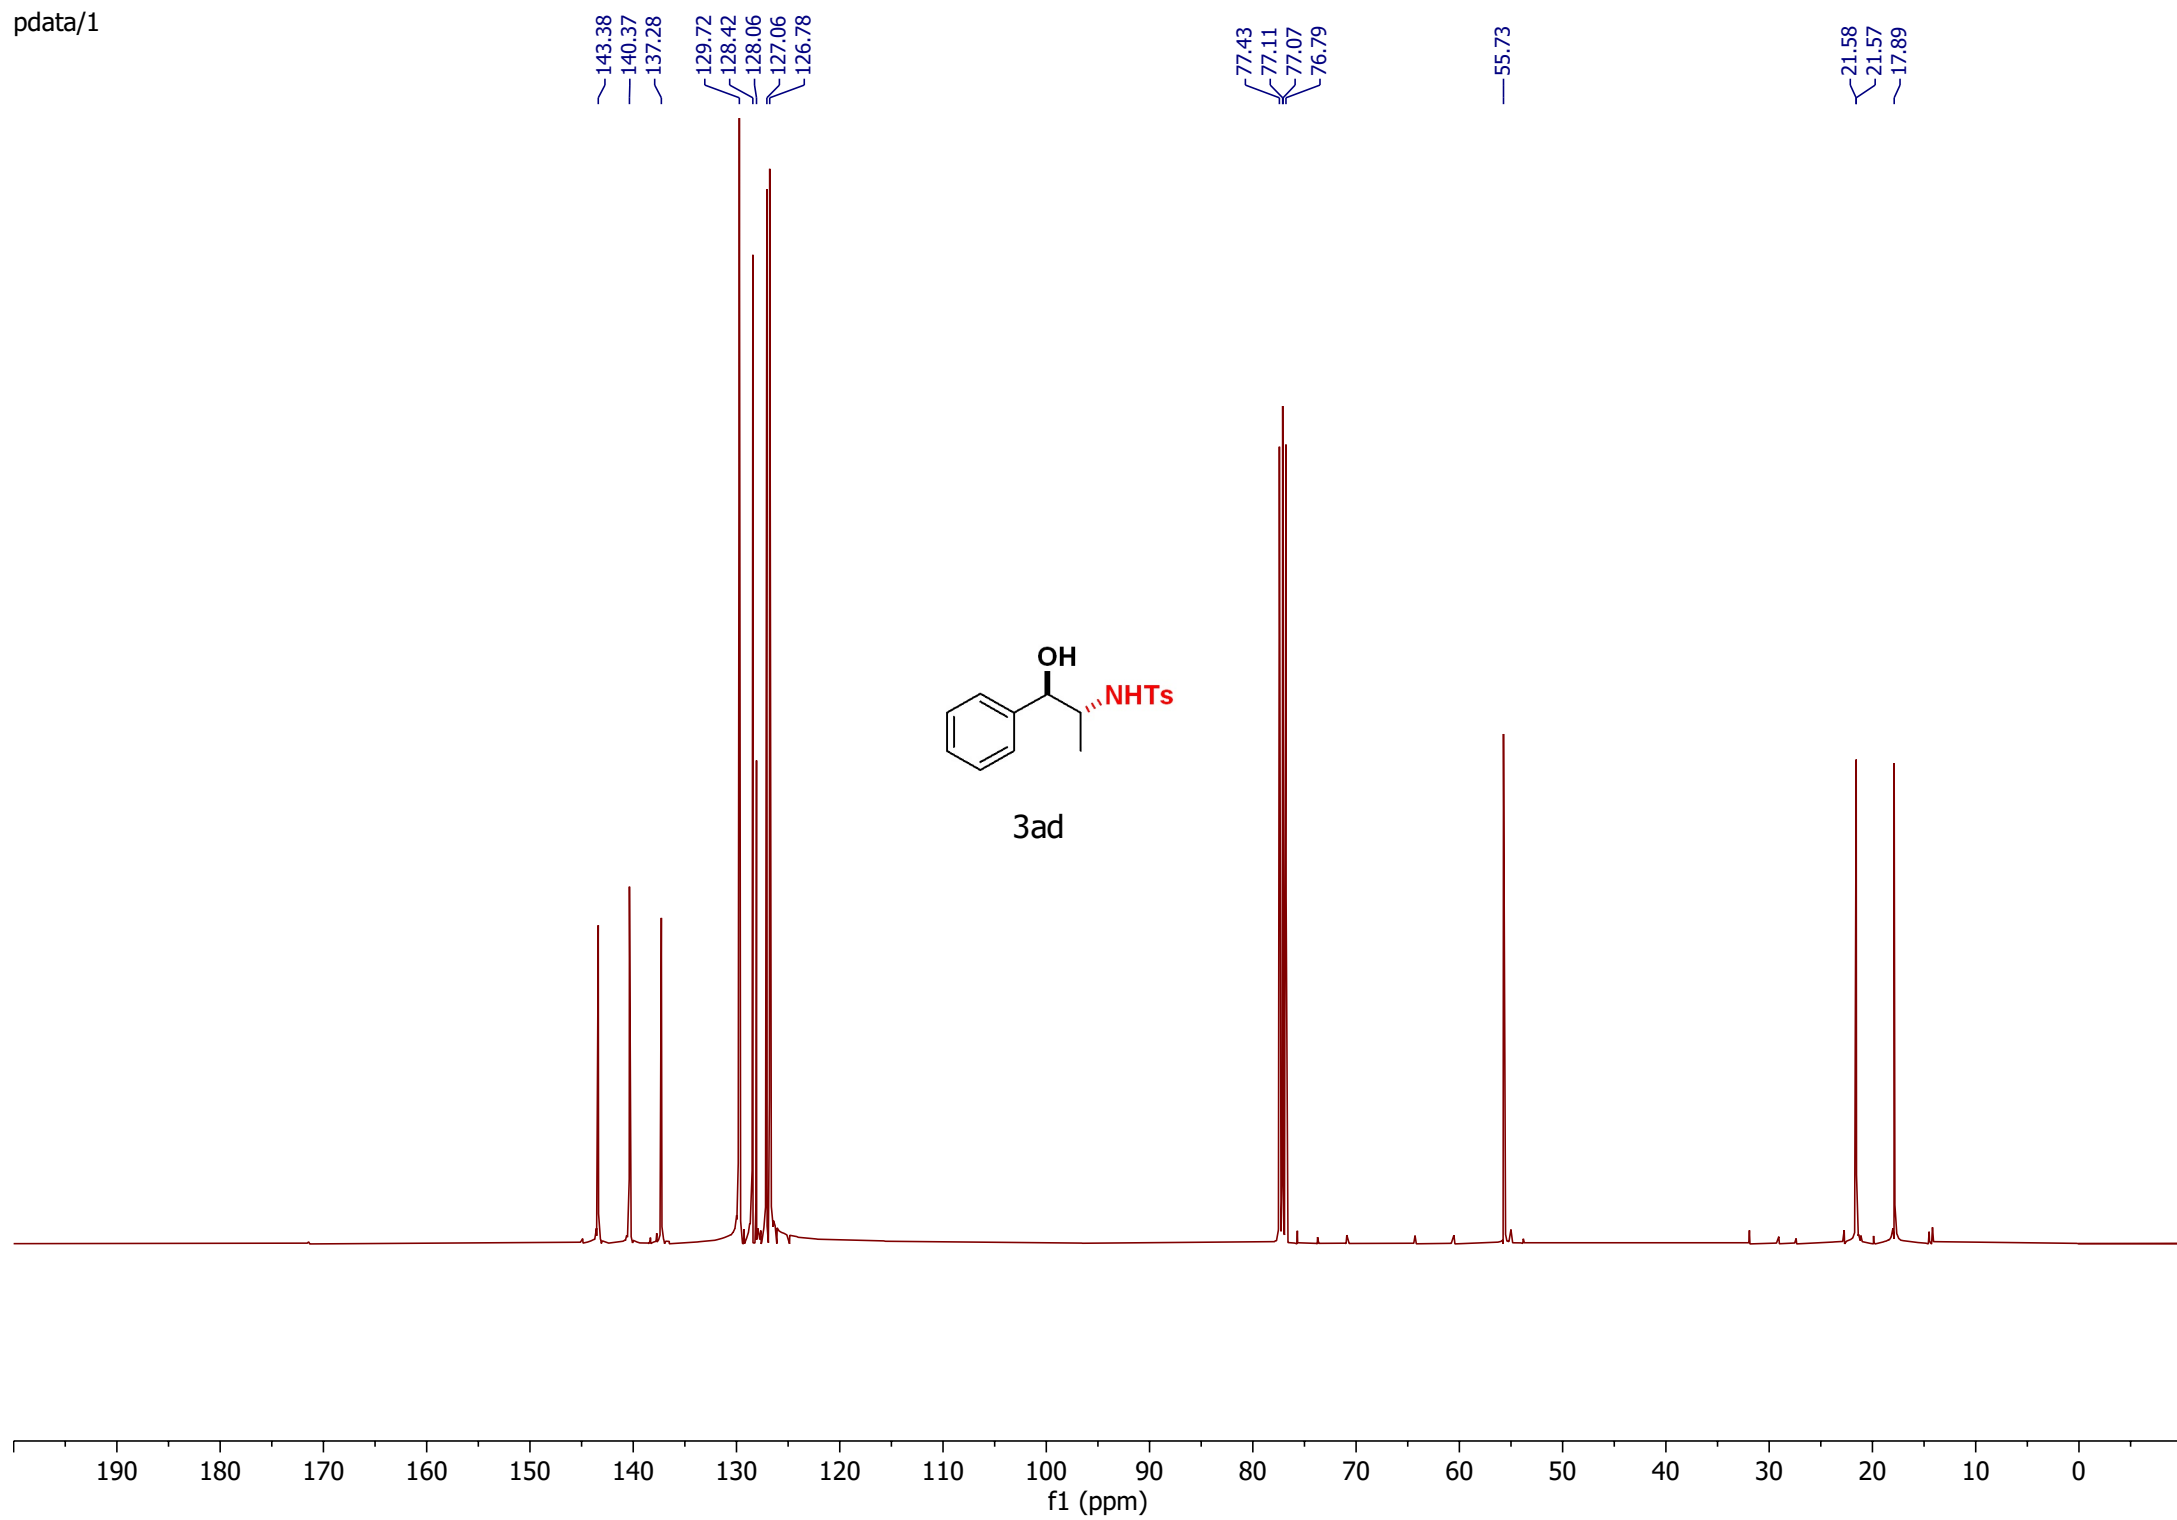

pdata/1  
RAM-NITRO-2

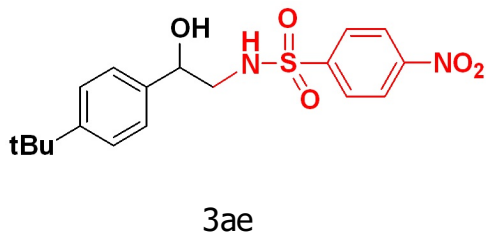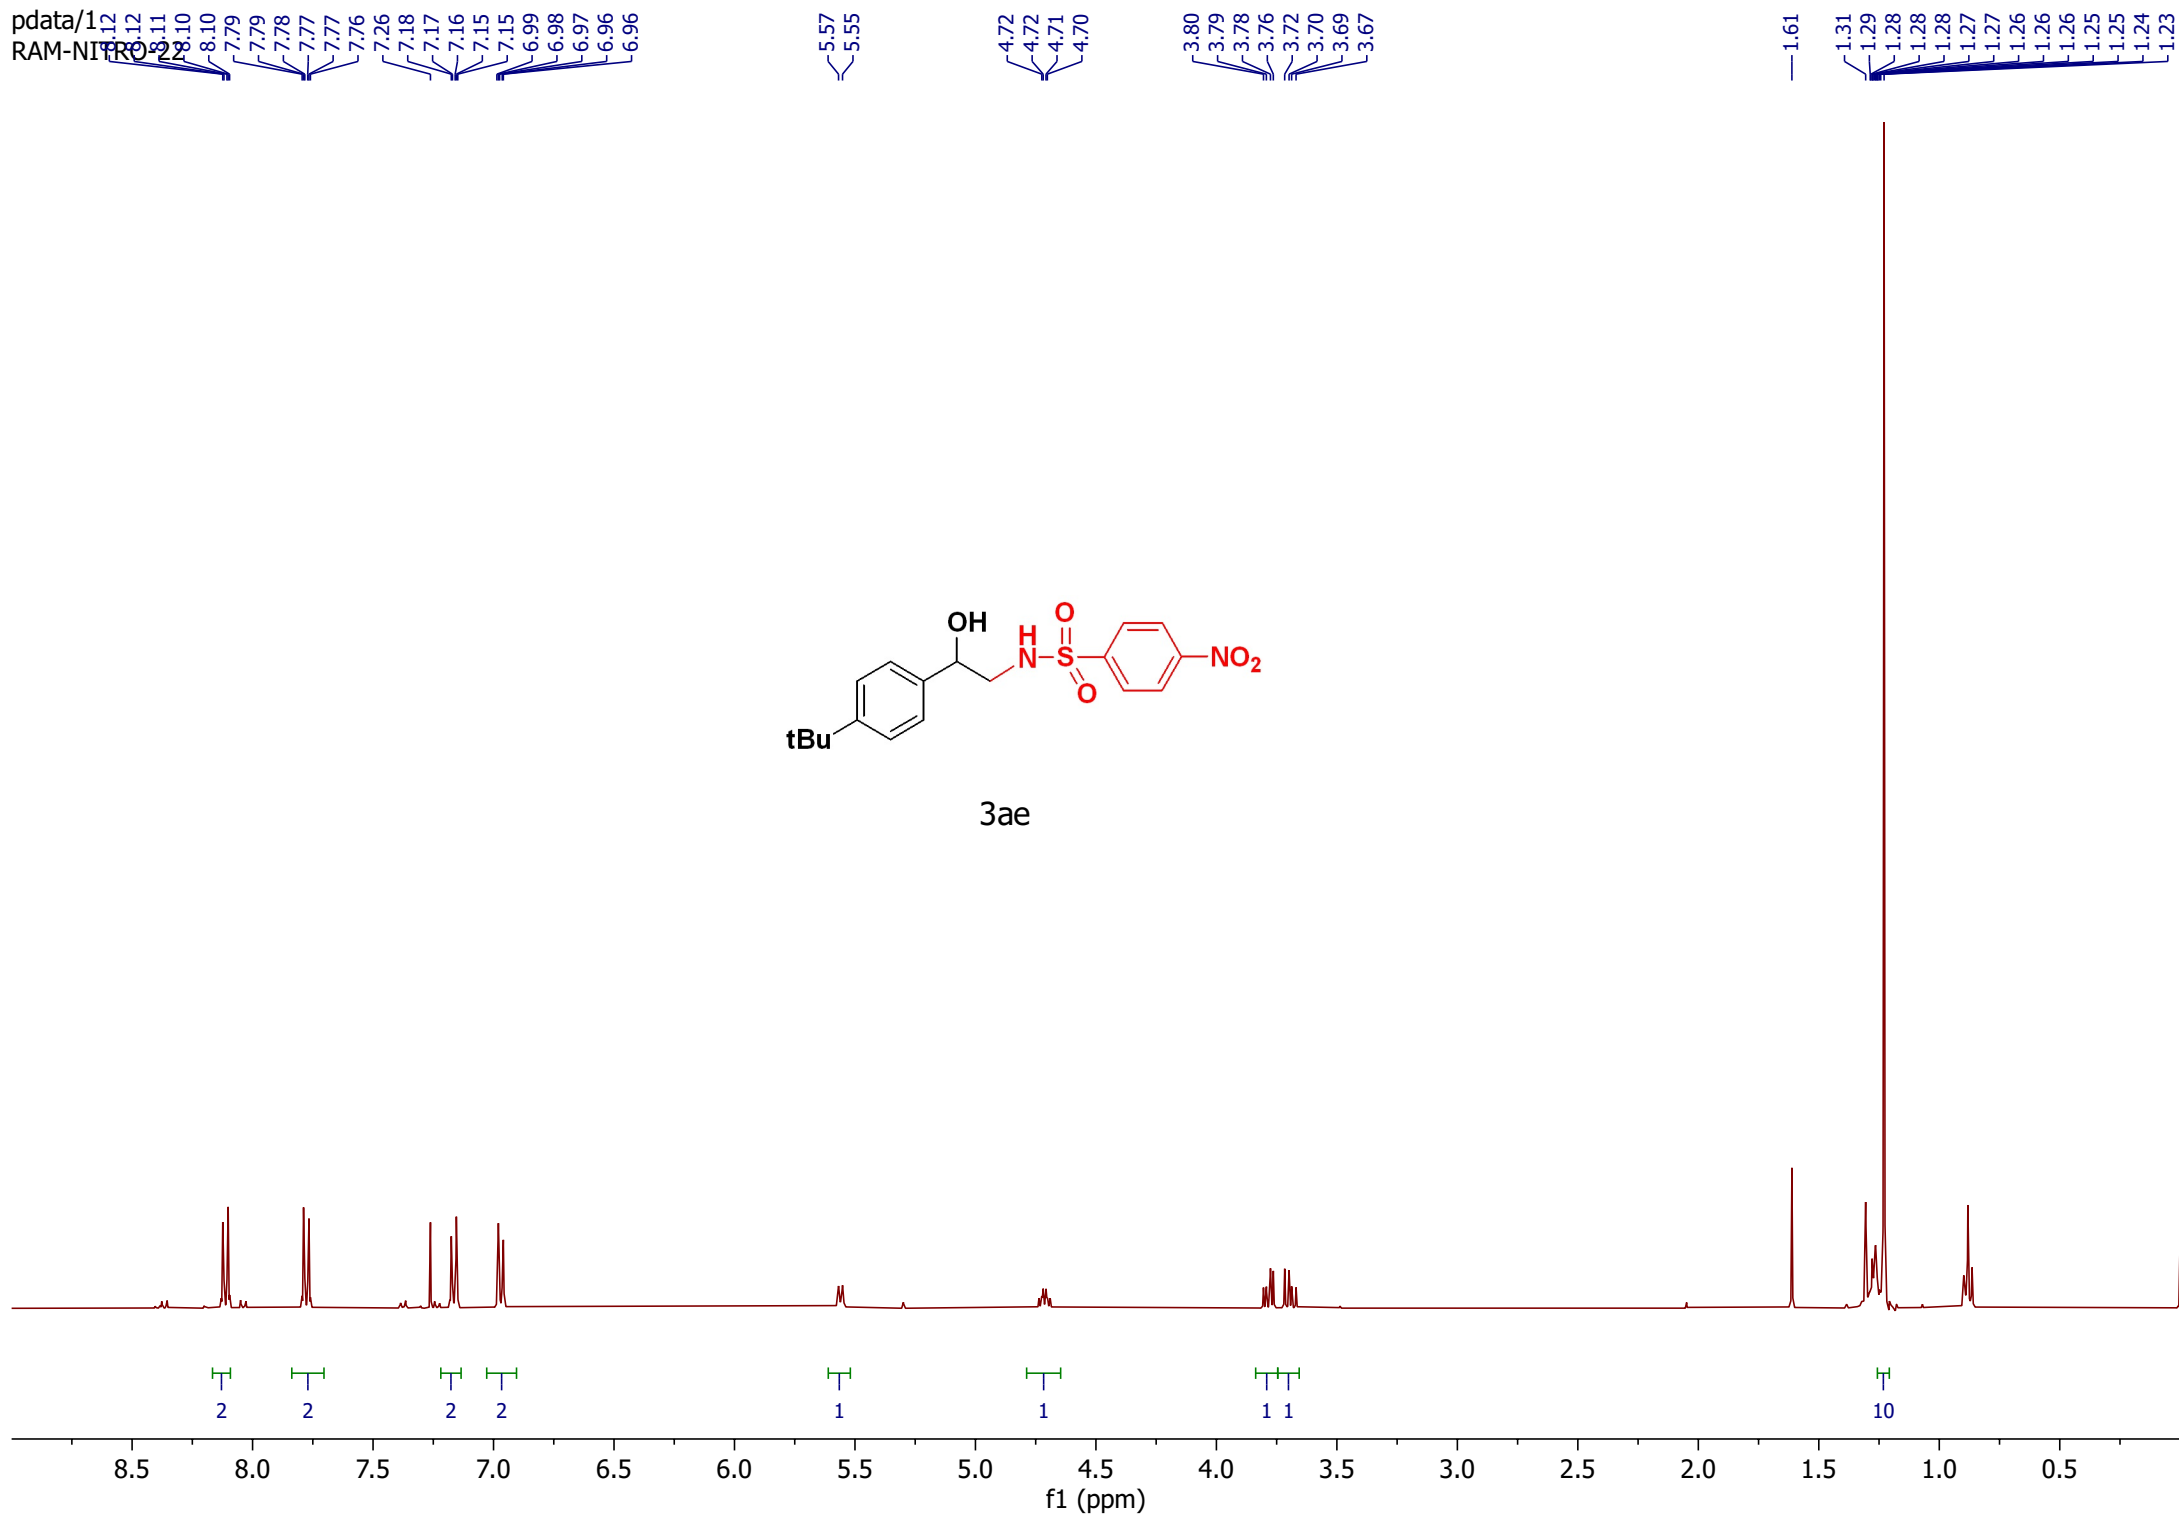

pdata/1  
RAM-NITRO-22 Carbon

152.15  
149.76  
145.97  
133.10  
133.07  
128.46  
128.27  
126.86  
126.75  
126.72  
125.64  
125.58  
123.81  
77.34  
77.23  
77.02  
76.71  
58.61  
47.88  
34.55  
31.20  
31.19

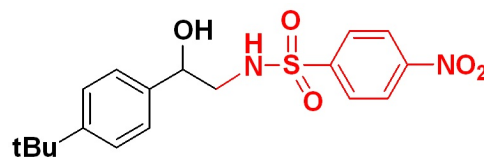

3ae



pd data 1  
RAM-NITRO-2

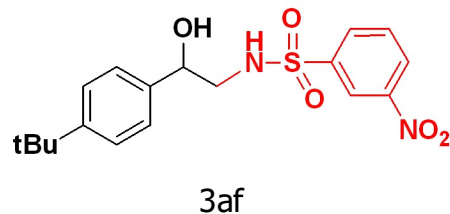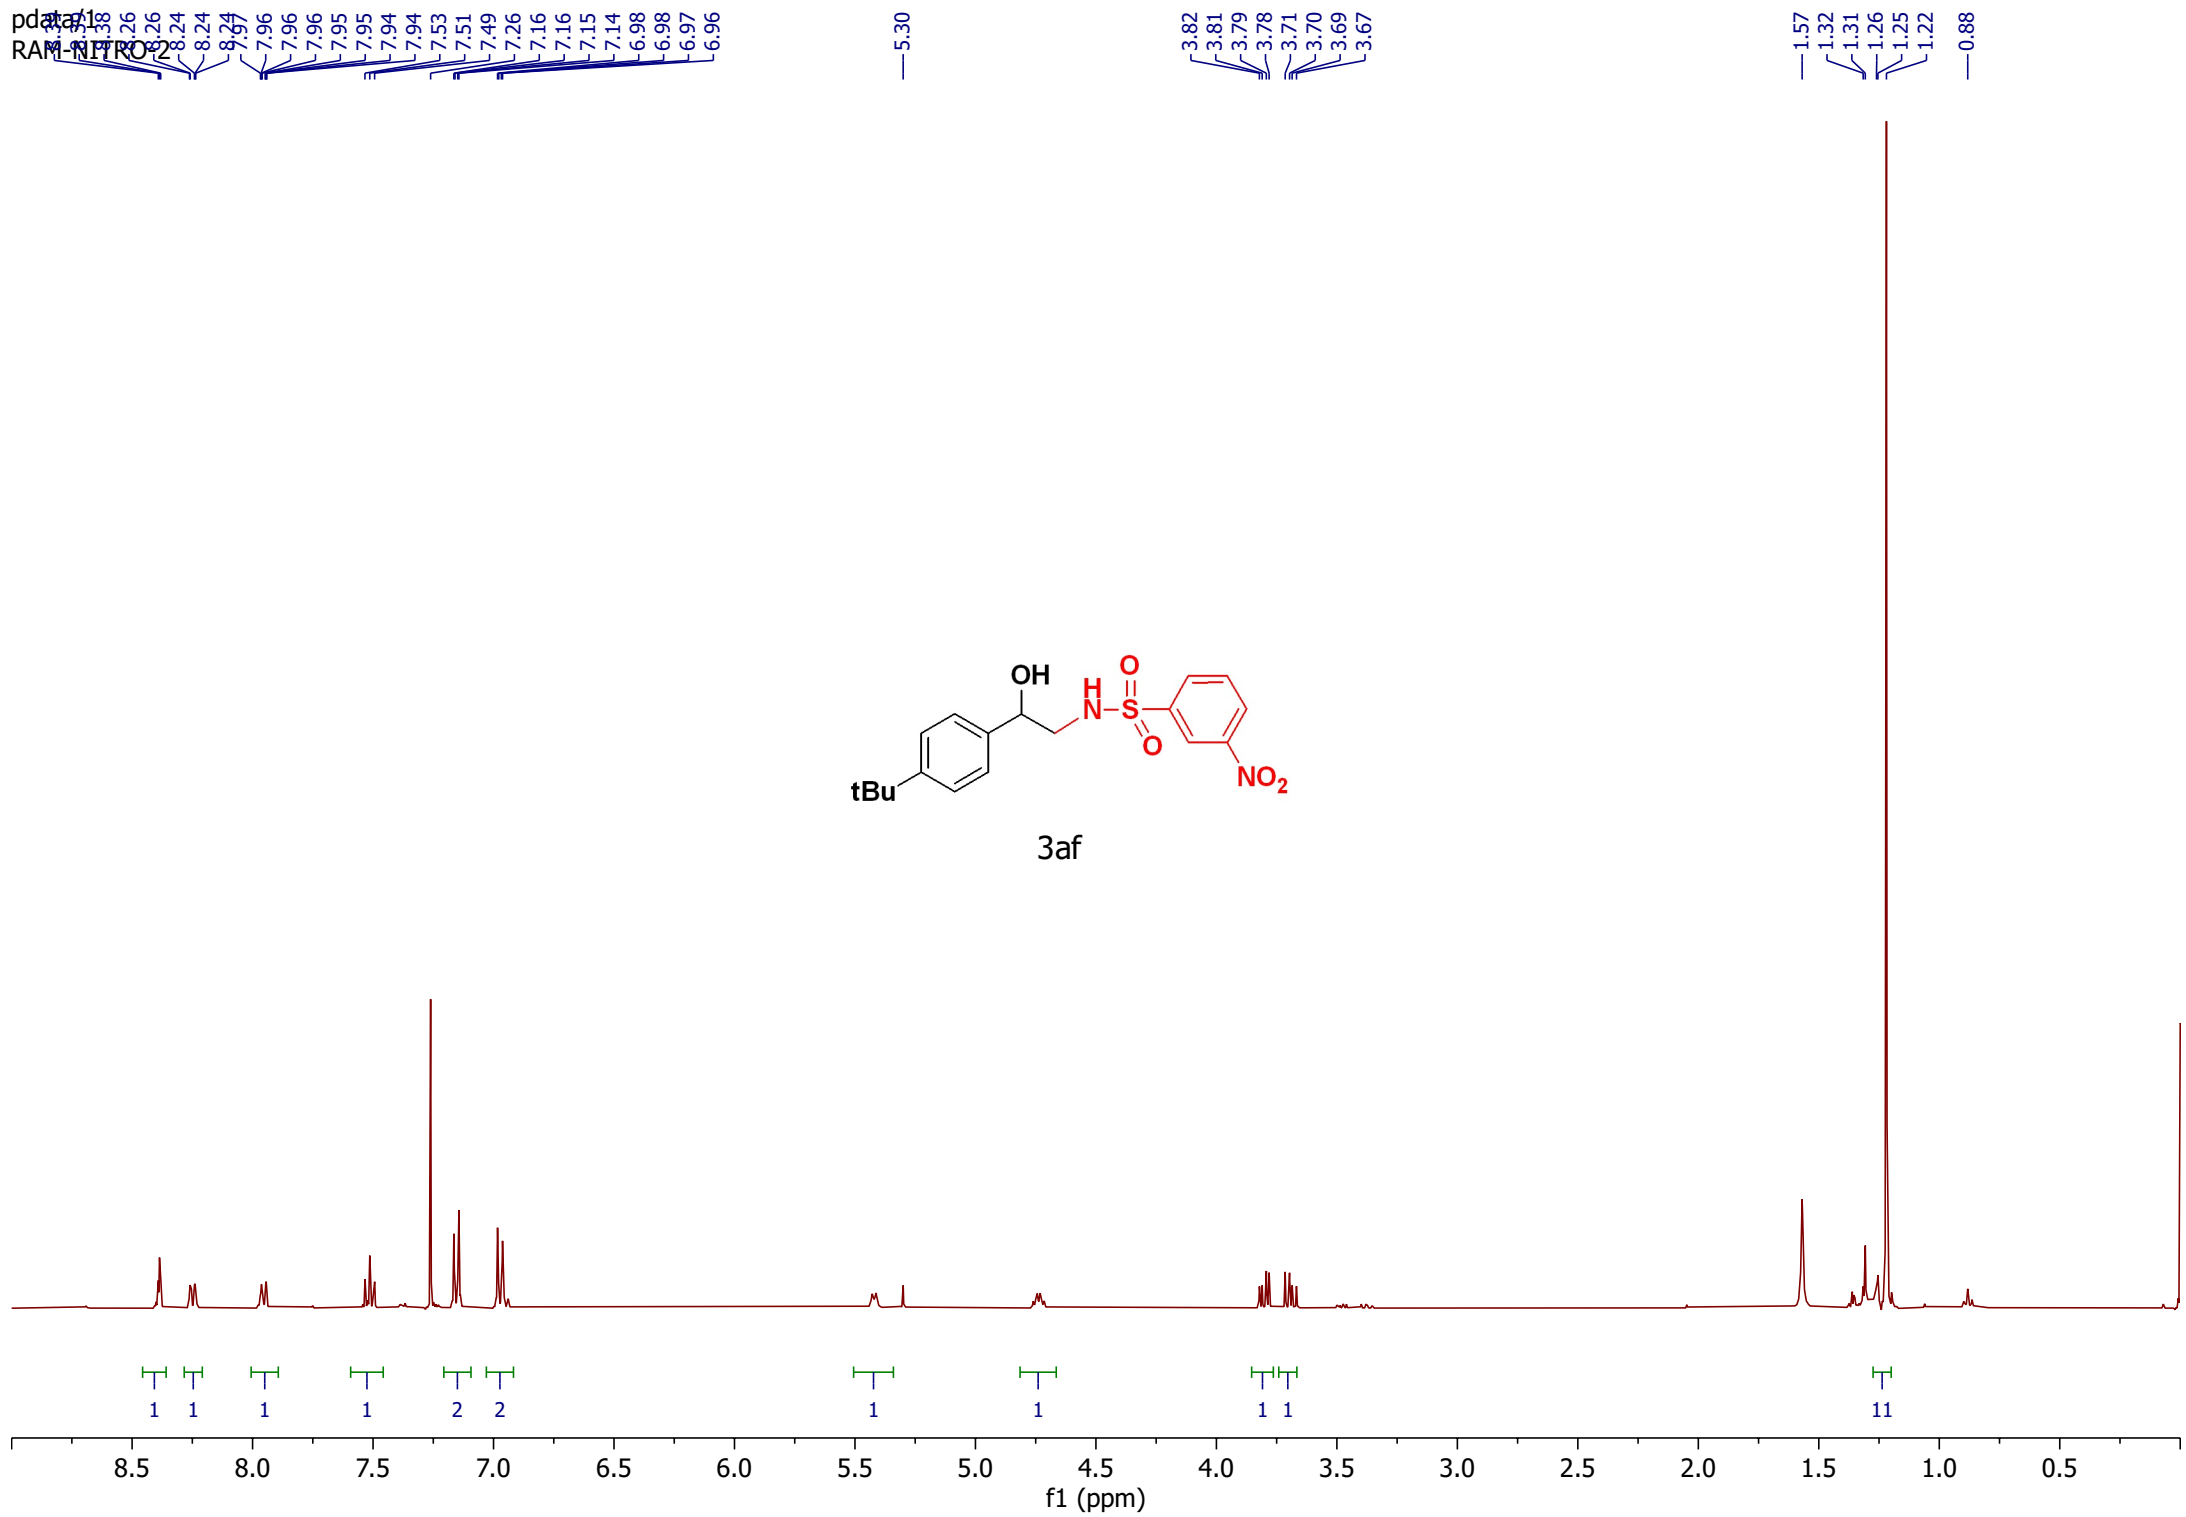

pdata/1  
RAM-NITRO-2

151.94  
142.40  
132.92  
132.61  
132.57  
130.01  
129.98  
126.88  
126.82  
126.80  
126.75  
126.72  
125.70  
125.66  
125.63  
122.72

77.34  
77.23  
77.03  
76.71

58.62

47.97

34.53

31.12

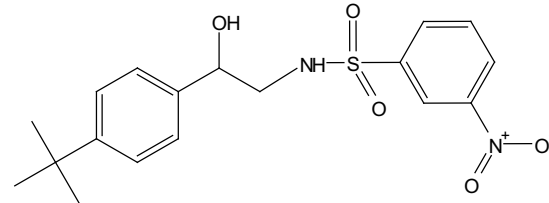

3af



pcdata\1  
RAM-106A-TT20

4.84  
4.83  
4.82

3.84  
3.83  
3.78  
3.77

1.58

1.22  
1.22

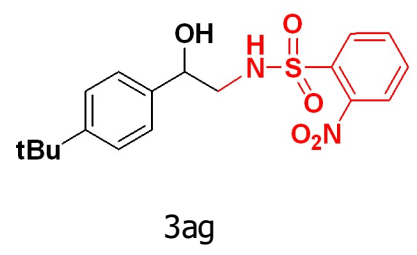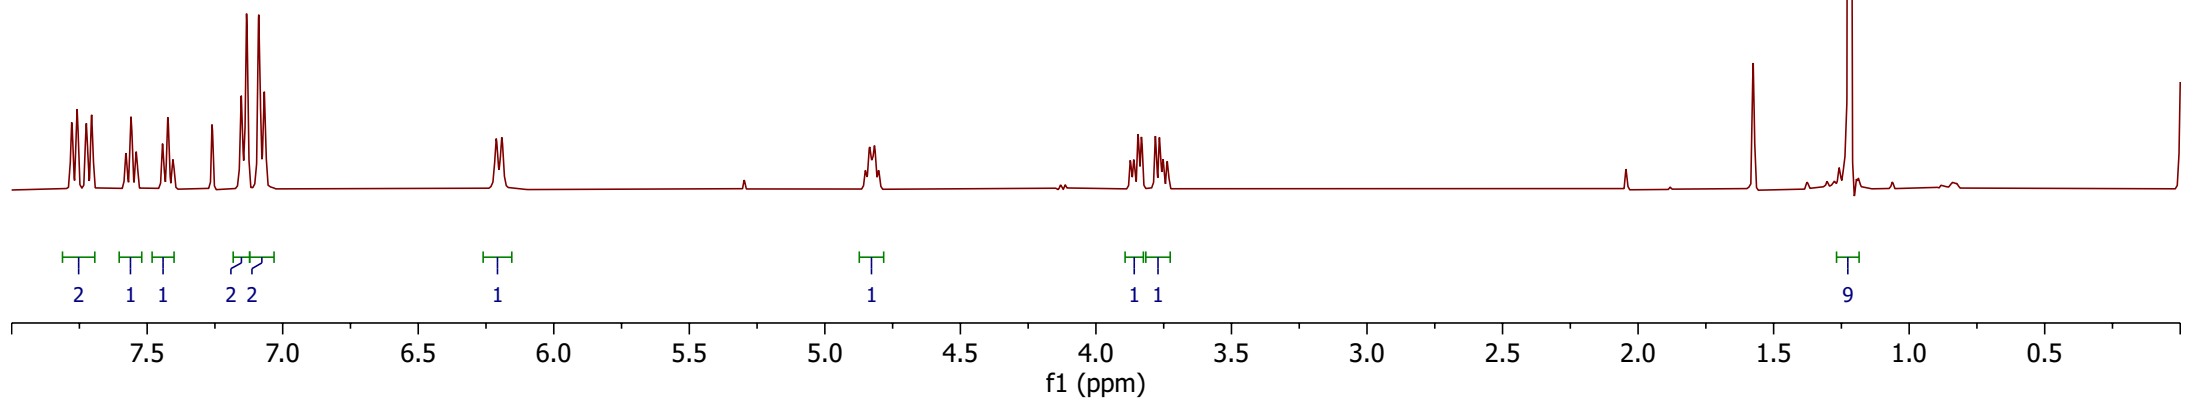

pdata/1  
RAM-106A-TT20

151.57  
147.39  
134.26  
133.66  
133.12  
133.11  
132.51  
132.49  
130.76  
126.59  
126.58  
125.45  
125.09  
125.04

77.35  
77.24  
77.03  
76.93  
76.71

59.25

48.01

34.49

31.21

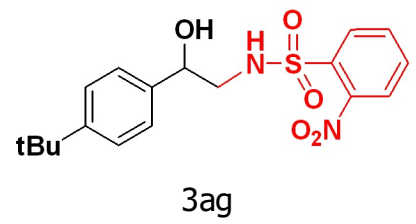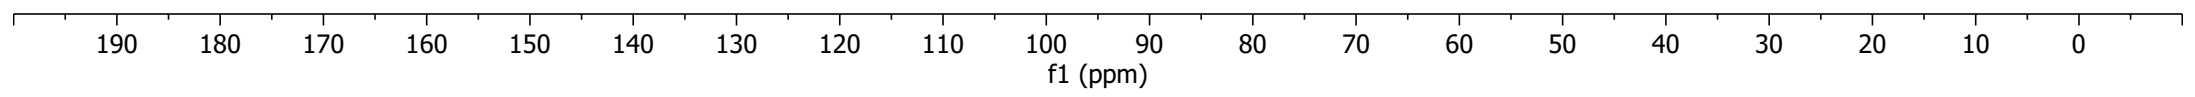

pcdata/1  
RAM-106C-TT-20

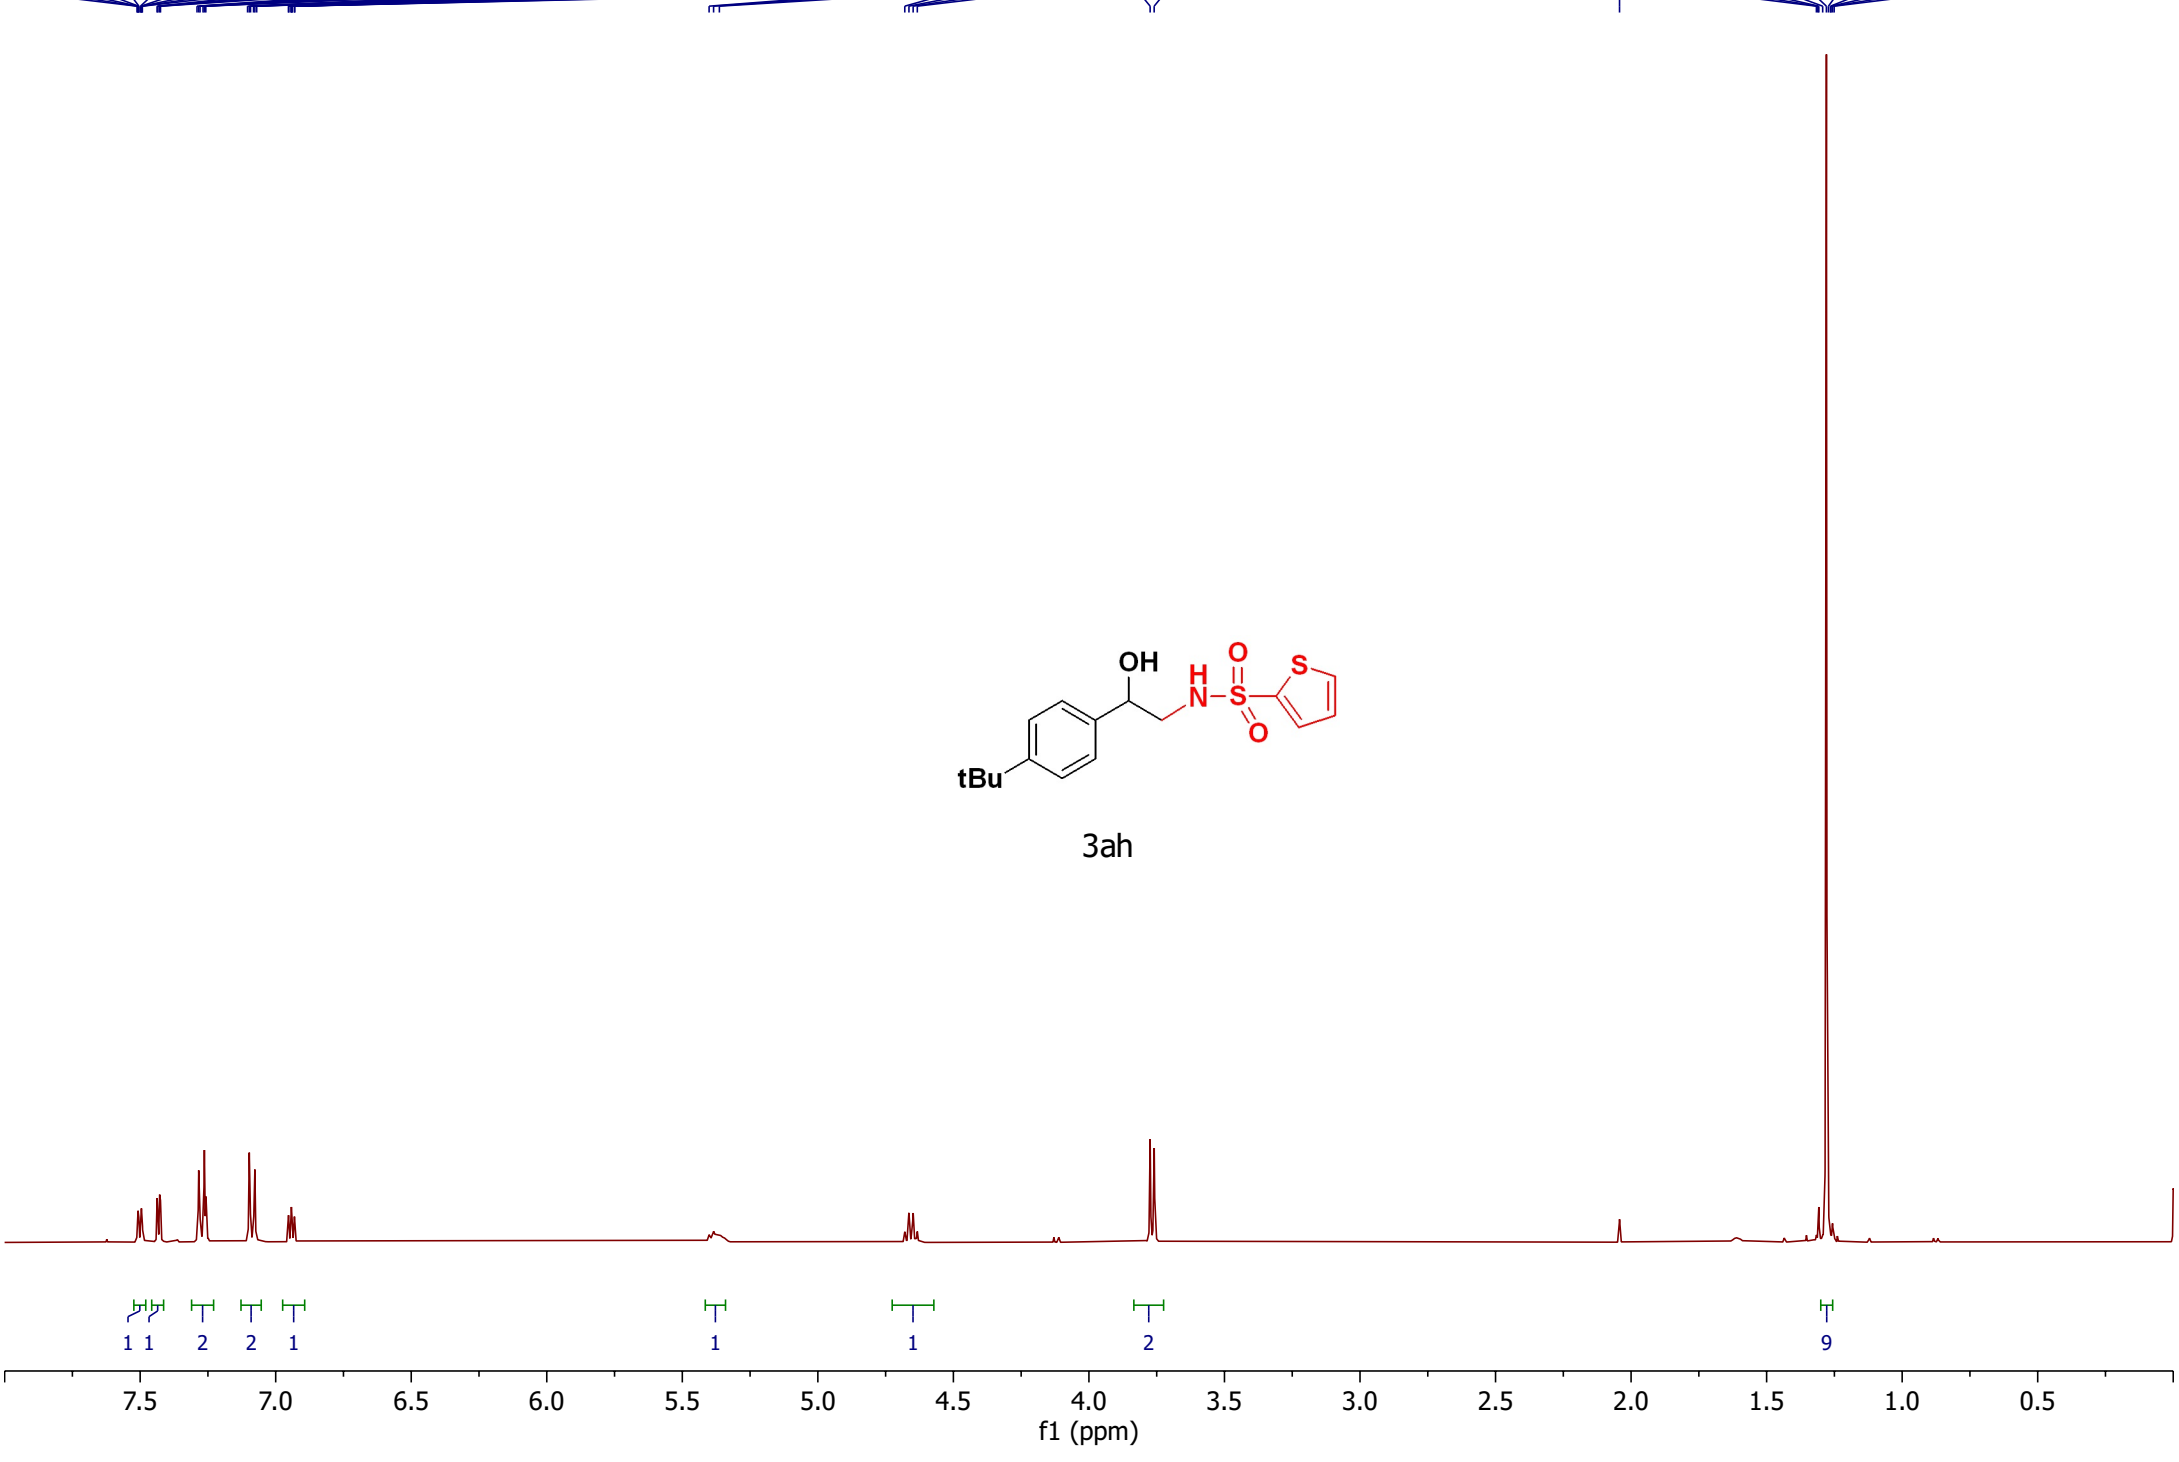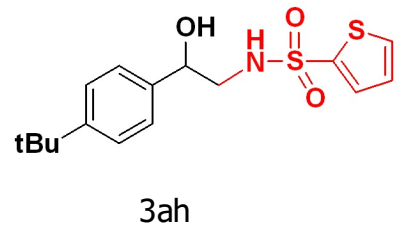

3.77  
3.76  
2.04  
1.32  
1.31  
1.31  
1.29  
1.28  
1.27  
1.26  
1.26  
1.25

1.1  
1.1  
2  
2  
1

1

1

2

9

f1 (ppm)



pdata/1  
RAM-106C-TT-20

— 151.52  
— 140.92  
— 133.87  
— 132.69  
— 132.15  
— 127.19  
— 126.51  
— 125.66  
— 125.61  
— 77.35  
— 77.03  
— 76.72  
— 58.45  
— 47.75  
— 34.55  
— 31.28  
— 31.24

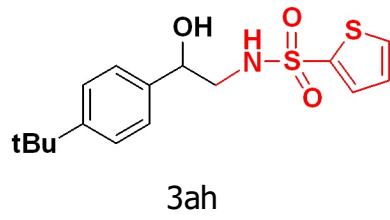

pd data 1  
7.27  
7.27  
7.27  
7.26  
7.15  
7.14  
7.14  
7.10  
7.09  
7.08  
7.07  
6.91  
6.70  
6.69

5.49  
5.48

4.67  
4.66

3.79  
3.77  
3.77  
3.76  
3.75  
3.74  
3.74

2.04  
2.04

1.33  
1.32  
1.32  
1.31  
1.29  
1.29  
1.27  
1.26  
1.24

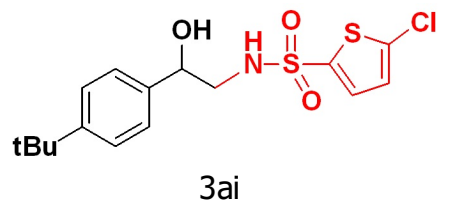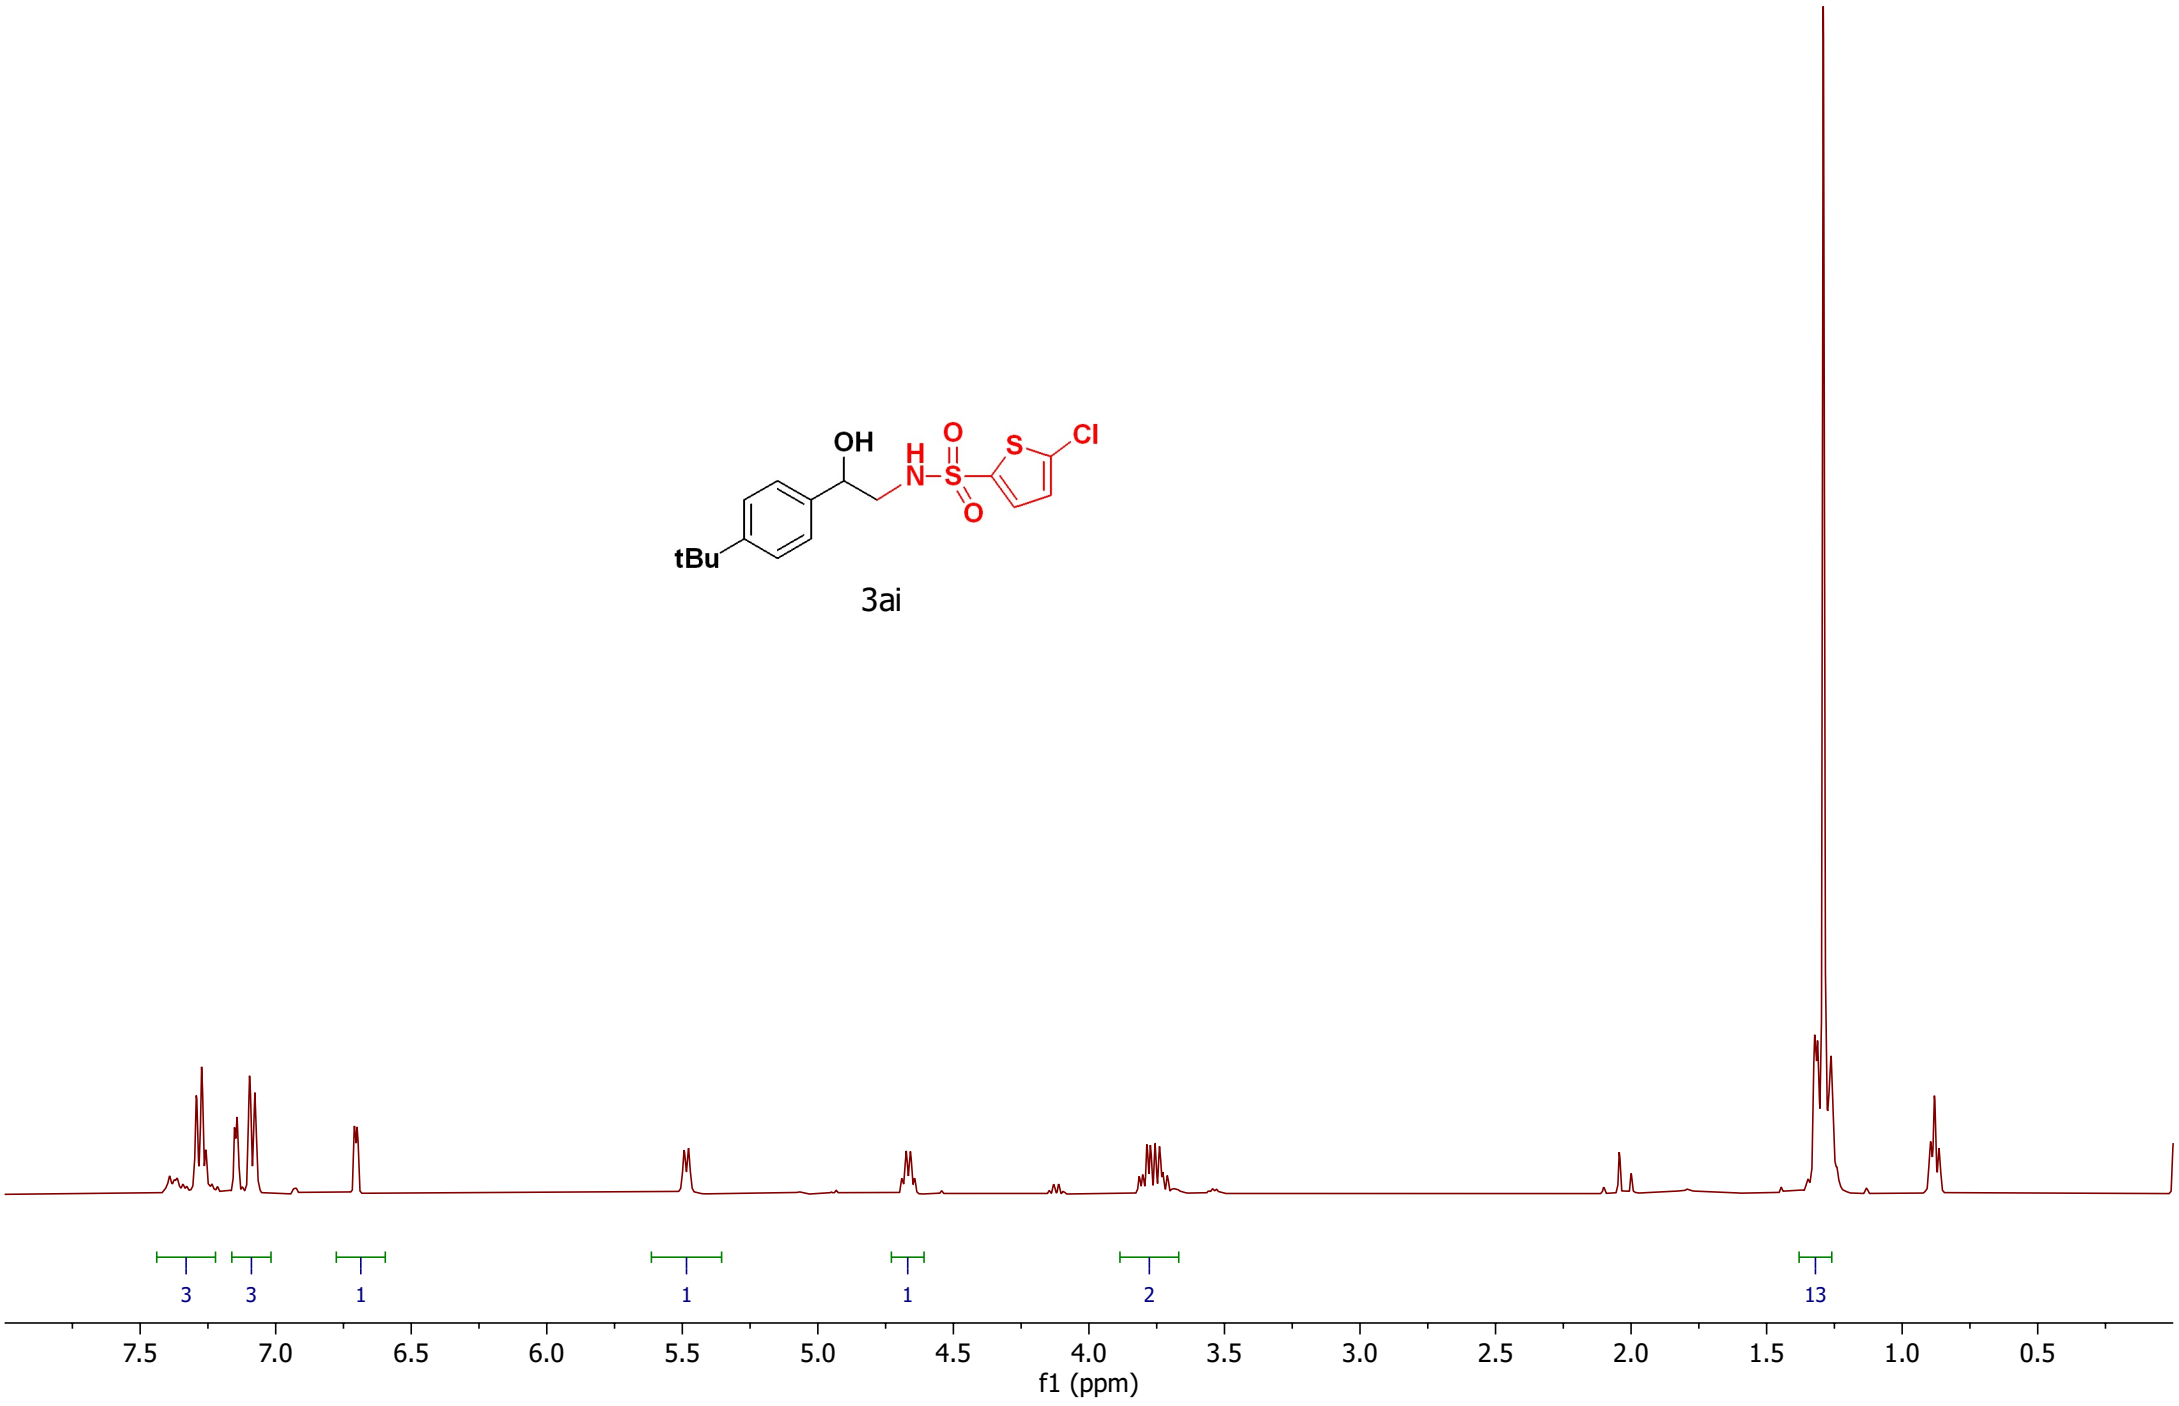

138.89  
137.61  
133.54  
132.14  
126.85  
126.59  
126.41  
126.38  
126.34  
125.70  
125.64  
125.50

77.34  
77.23  
77.02  
76.91  
76.71

58.51  
58.43

47.88

31.40  
31.30  
31.26  
31.23

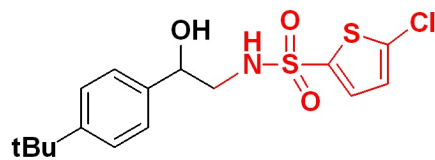

3ai

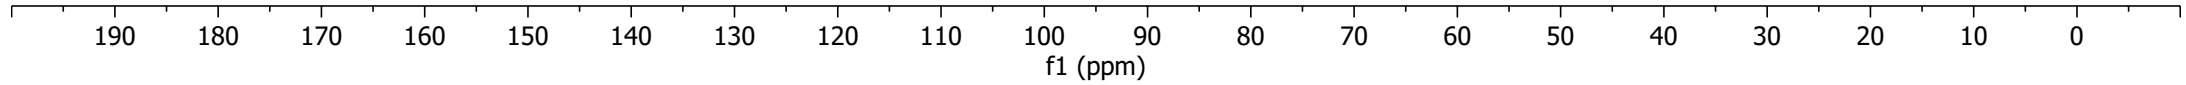

pdata/1  
AAP-0155A

5.6422  
5.6248

4.6754  
4.6595

3.7806  
3.7678  
3.7522  
3.7327  
3.7289

1.7264  
1.7027  
1.6927  
1.3166  
1.3116  
1.2975  
1.2924  
1.2888

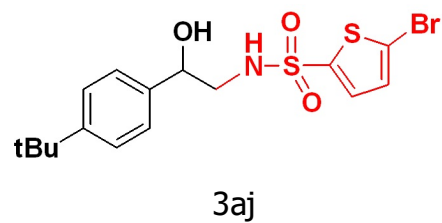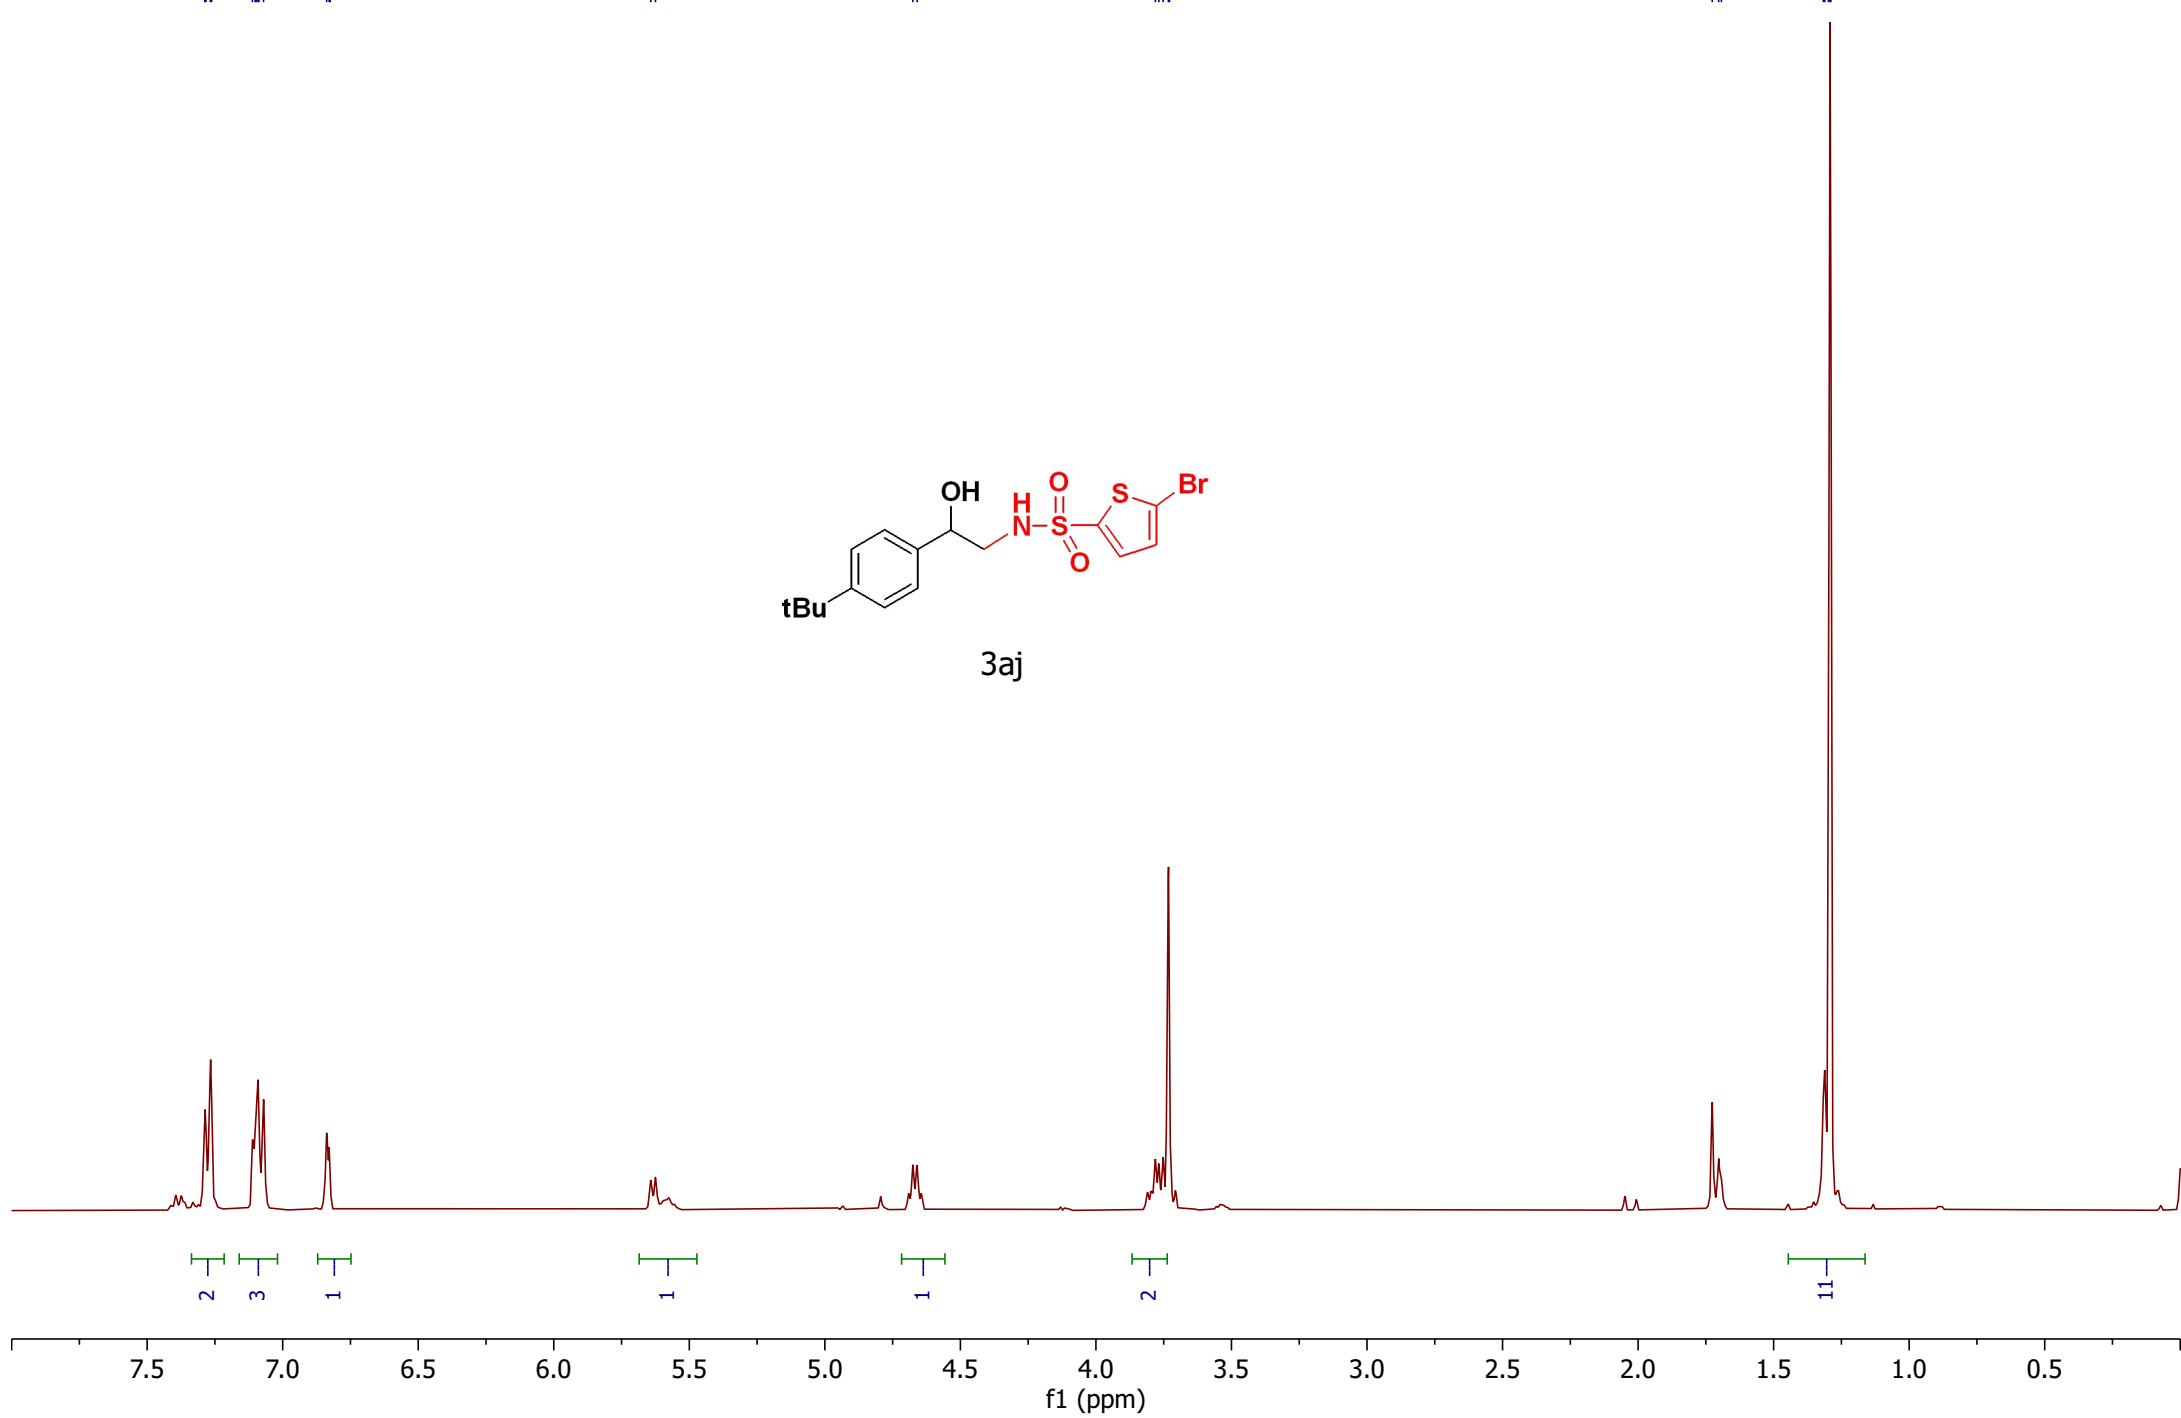

151.73  
141.76  
133.57  
132.81  
130.04  
130.03  
126.90  
126.55  
126.54  
125.68  
125.64  
125.56  
120.12

77.35  
77.04  
76.72

58.63

47.83

34.56  
31.27  
31.22

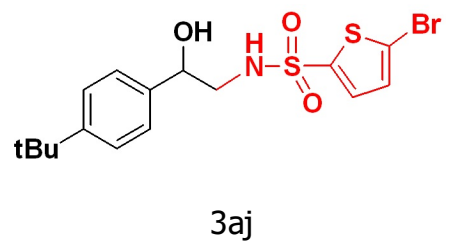

pdata/4  
RAM-B-TT-17

5.61  
5.59

4.63  
4.62

3.73  
3.72  
3.71  
3.71  
3.69

1.67

1.32  
1.30  
1.27  
1.27

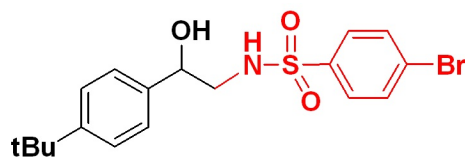

3ak

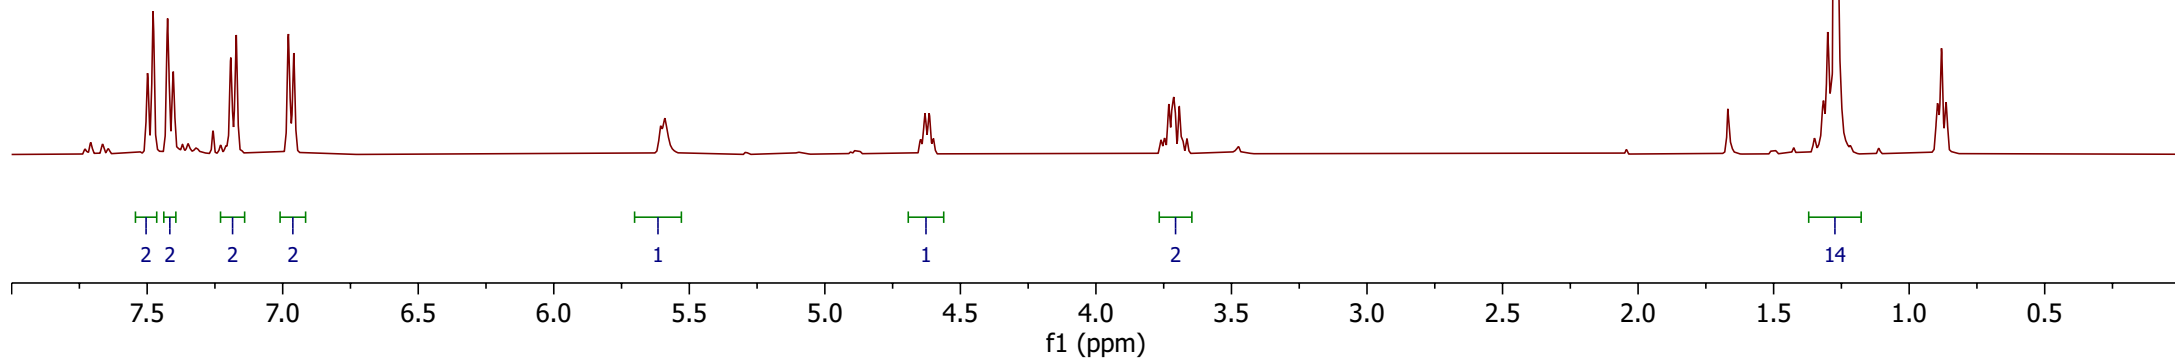

pdata/1  
RAM-B-TT-17

139.18  
133.48  
131.90  
128.70  
127.38  
126.63  
125.55

77.35  
77.04  
76.72

58.53

47.87

34.53  
31.88  
31.28  
31.21

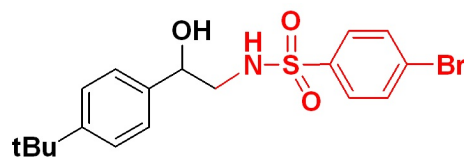

3ak

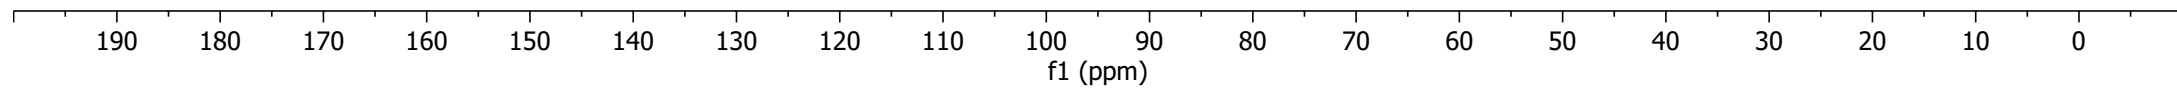

ppm  
7.880  
7.808  
7.772  
7.691  
7.627  
7.574  
7.496  
7.451  
7.260  
7.198  
7.179  
7.174  
6.995  
6.990  
6.974  
6.969  
6.964  
6.945  
6.941

5.627  
5.620  
5.609  
5.603

4.624  
4.608

3.733  
3.717  
3.698

1.695  
1.325  
1.299  
1.286  
1.266  
1.257  
1.254

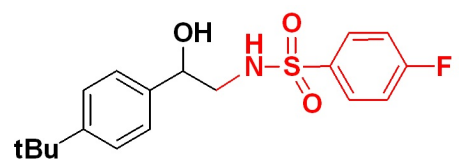

3al

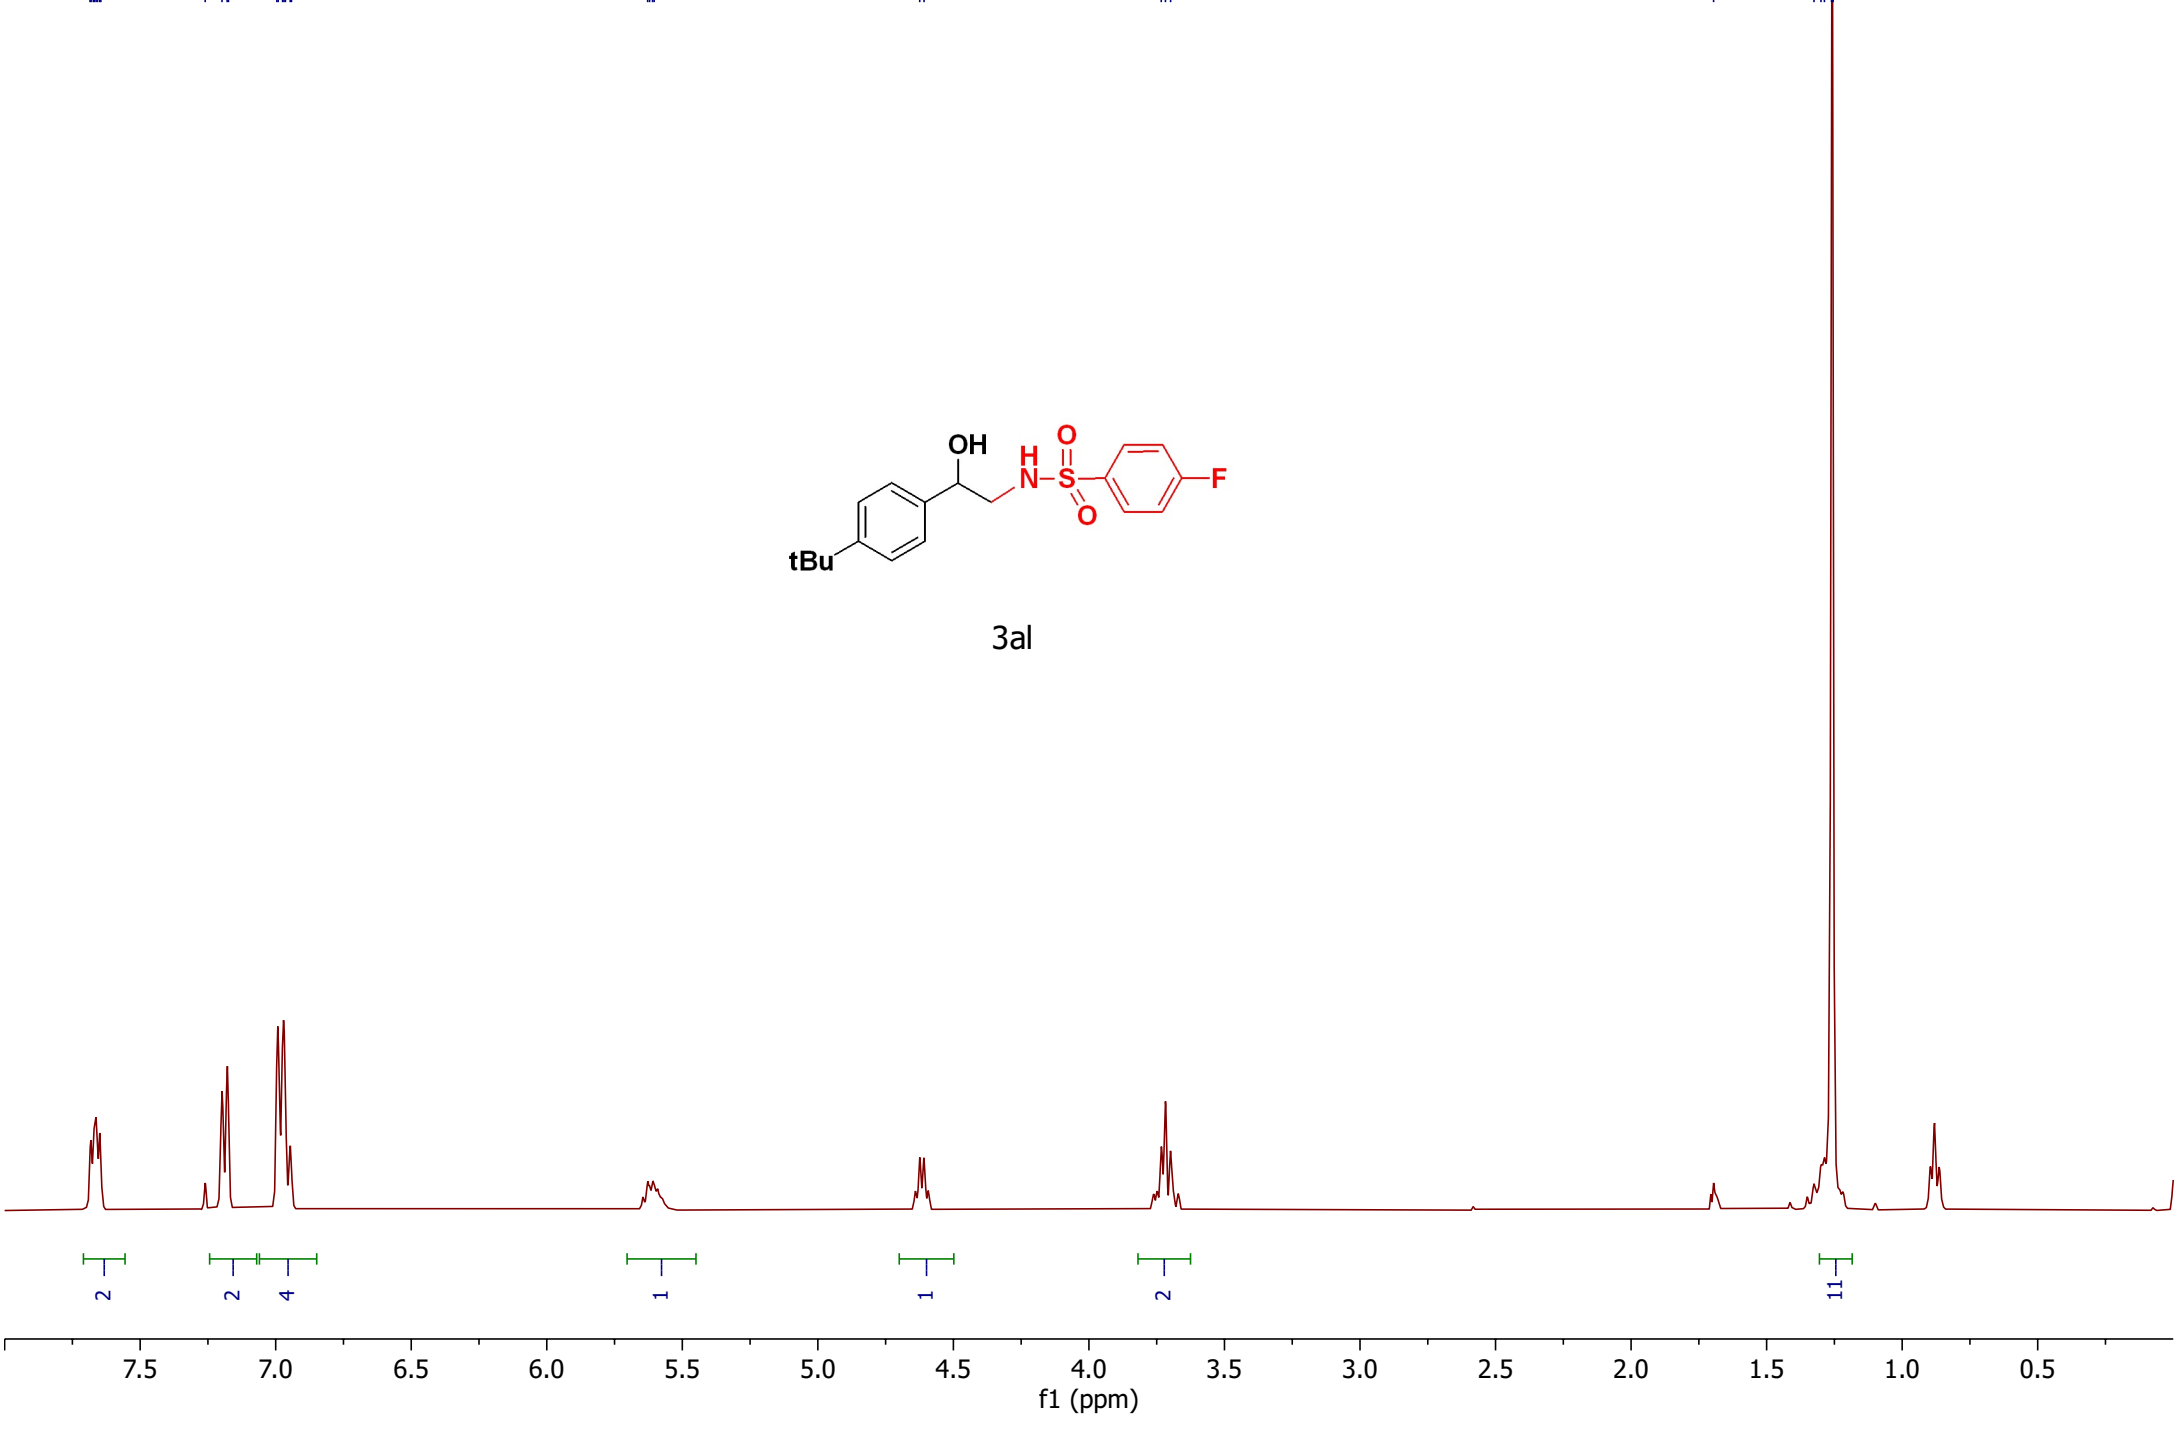



pdata/1  
AAP-III-55B

166.13  
163.60  
151.55  
151.53  
136.19  
136.15  
133.64  
130.02  
129.98  
129.89  
129.88  
129.84  
129.81  
126.73  
126.63  
126.56  
125.62  
125.58  
125.55  
116.07  
116.00  
115.77  
77.36  
77.25  
77.05  
76.73  
58.53  
47.86  
47.81  
34.51  
31.27  
31.22  
31.04

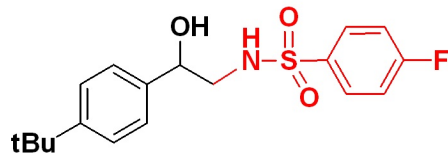

3al



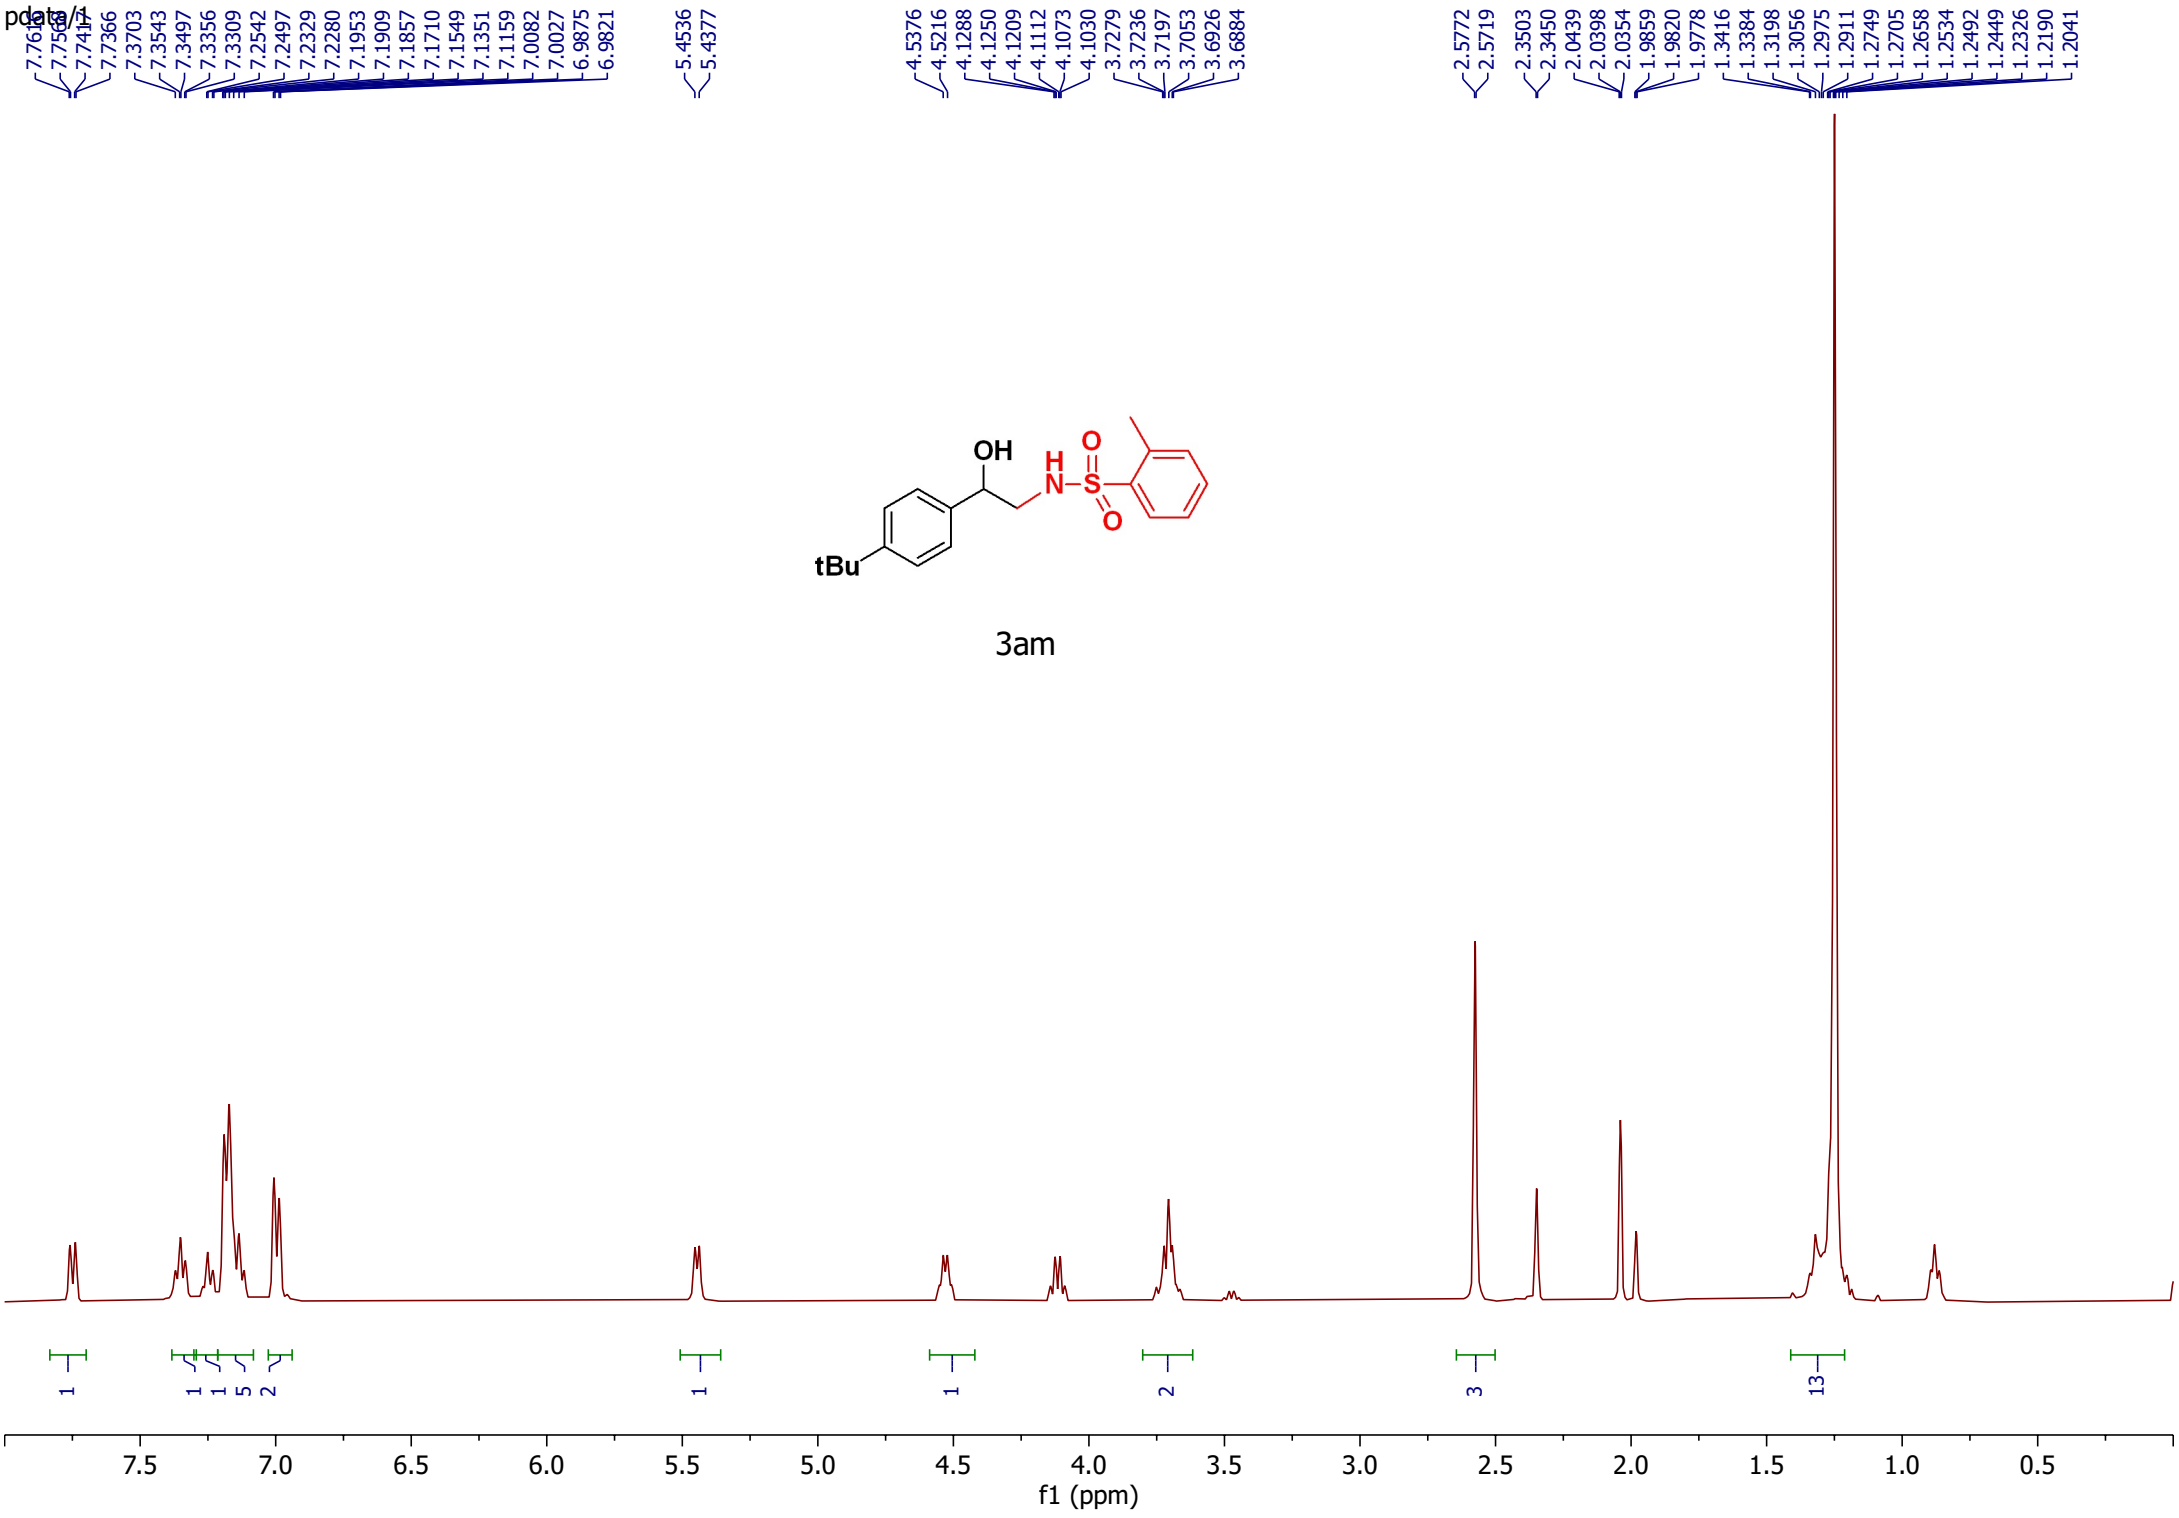

pdata/1  
RAM-106D-TT-21-REDO

7.42  
7.41  
7.40  
7.29  
7.29  
7.28  
7.27  
7.27  
7.26

5.27  
5.26

4.80  
4.79  
4.78  
4.77  
4.76  
4.75

3.87  
3.87  
3.86  
3.85  
3.84  
3.84  
3.83  
3.83  
3.77  
3.77  
3.75  
3.75  
3.74  
3.74  
3.72  
3.72

2.79  
2.79

1.34  
1.33  
1.32  
1.32  
1.31  
1.31  
1.30

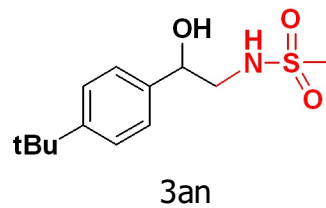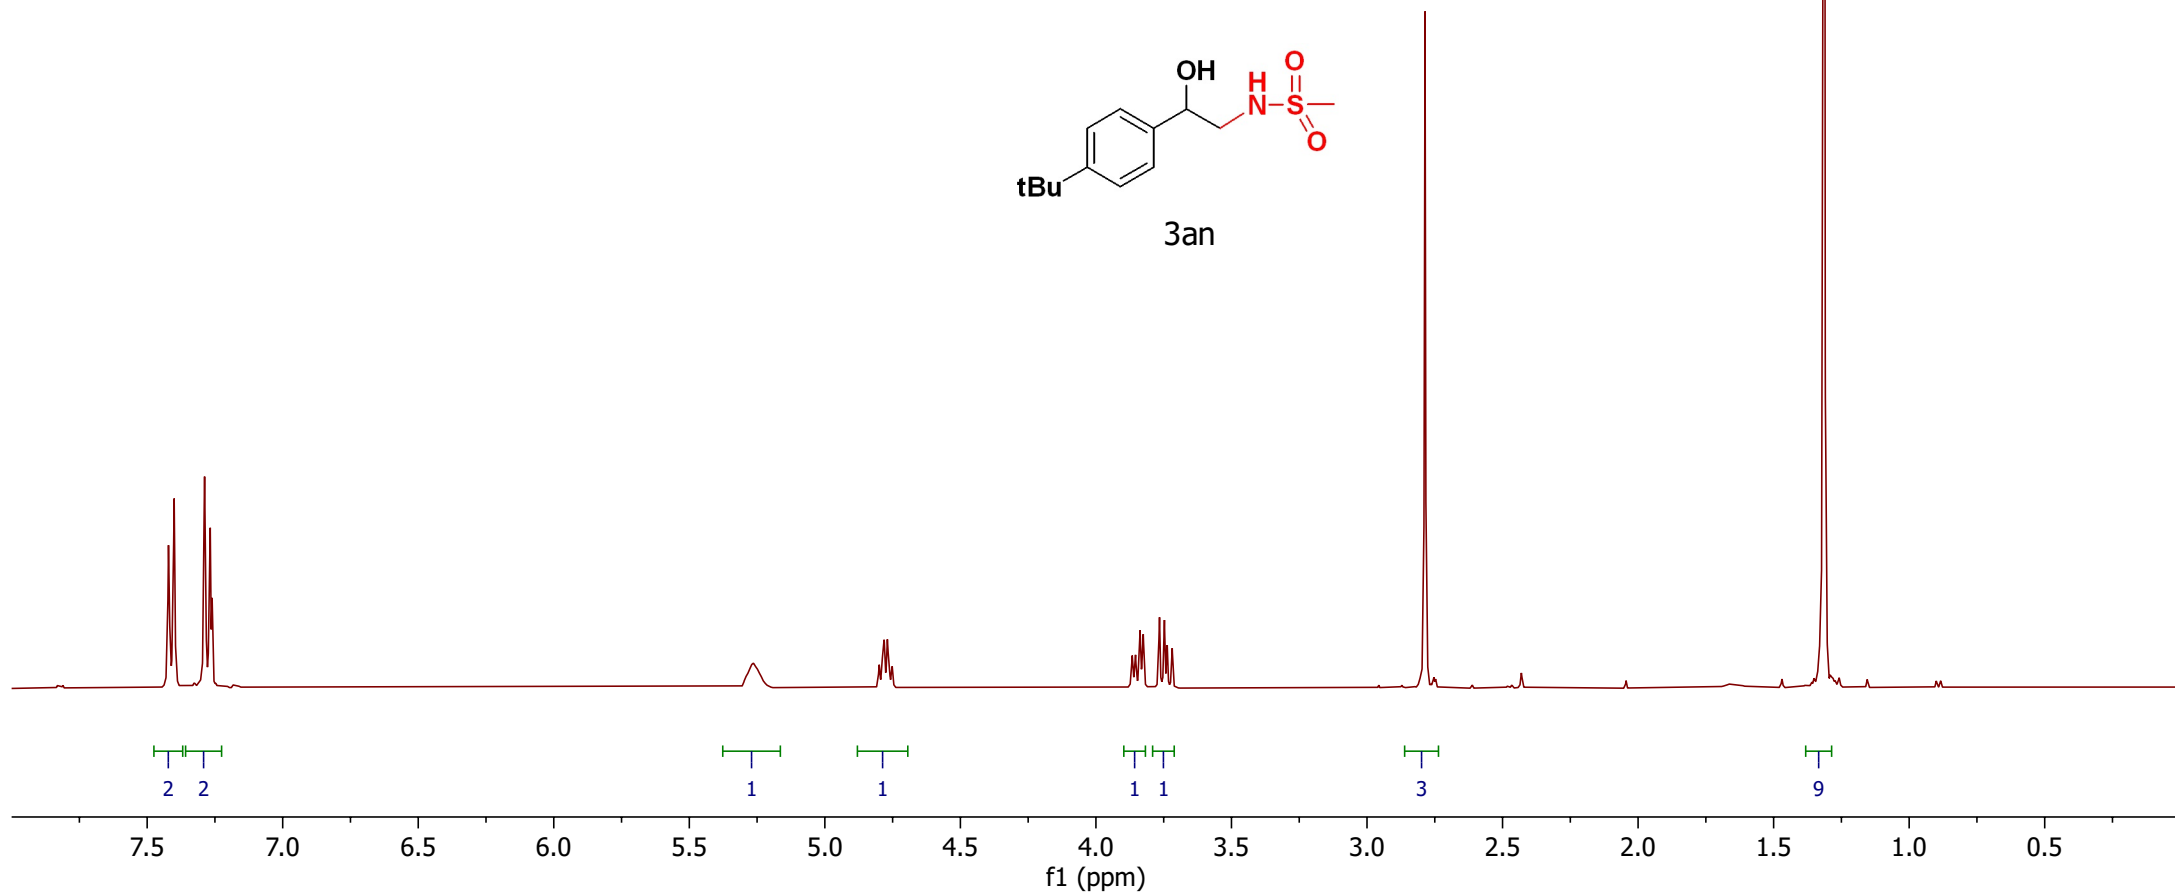

pdata/1  
RAM-106D-TT-21-REDO

— 151.94

— 134.69

— 126.55  
— 126.01

— 77.35  
— 77.04  
— 76.72

— 58.43

— 48.41  
— 48.39

— 42.01

— 34.64

— 31.26

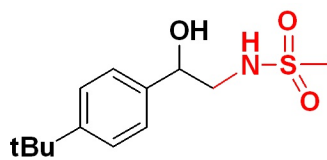

3an



Supplement: d4ob00022f1.pdf [file d4ob00022f1.pdf]
